# Supplementary material for: Evolutionary History of Oxysterol-Binding Proteins Reveals Complex History of Duplication and Loss in Animals and Fungi
Source: Contact (Thousand Oaks). 2023 Jan 11;6:25152564221150428. doi: 10.1177/25152564221150428 (PMC10243569; doi:10.1177/25152564221150428)
Supplement: sj-fa-1-ctc-10.1177_25152564221150428 - Supplemental material for Evolutionary History of Oxysterol-Binding Proteins Reveals Complex History of Duplication and Loss in Animals and Fungi [file sj-fa-1-ctc-10.1177_25152564221150428.fa]

>XP_013759480.1_oxysterolbinding_protein_[Thecamonas_trahens_ATCC_50062]
MPDGHGLPGGGGGGGGGGSKIKVKTKTKAKAKAKTNANGKPGAGGGGGGGGGGAGGPGGGPAGGIVGGGGVGGELGGGLDDGGGVGGGGGGGGGRDEVEVVEISGGEIGWRGVGRVGGGTGDVIMSGWVKLRGTFQRWKNKWMVLKPGKLLFFRRPTSRKHSVYVYIHGCKVVEKPSRRRGFSFKIYHPQGRRIMSKKIATDHCVLRVPLRKEMEAWLAALRSAVAYADAHLPLPYHPKHNQFTLRHGNLALLDNSRRVSNGSGVGAATLGTSGGLANGESRGGAGAGVGTGGGEPGGGSGAGSAASERLSLEQSQGAESAAAAWRALANTVTPKRGETRLQAWIRVLHAGYVRAPLGLGRALPQVEVALSAEQLELVRLAIGHLRNGASLDSVSLPAFVYQDRSLLQRLGDLGLSSPYLASIKQIDSAPRRMVAVVQWVLHVLNINAMDGALLRLPLTPLPGEVHRELFALPRPTDDDTSLPGSPPLVTHFVAEHLGSSPHATGFYMTNRDAGFVANGSLVFDSVYKGWCVEGGPSSASVIDLMFLAHSEVYTVTLPLMRATGLPLGSVAVDYVGEASVVCPSSGLAATLNFESRGLFGGSFHNVSGRVVEVVSSEAEREREREREGDGERGDDELPVTPGGERTGPDSPPRGKTLFTLSGKWNDSVRVERDVGEGGGDSEAWELDVSNATILAMAANMERYGAADDNCAEFESAKVWRETVTALRNGNAVGAQAARERVQAHKRAPGAGRAPSLFVSLADDDVWEYAYANTVVSHRGVCDRDRGGGVIRPFALTGSFAGTGSGDGMGDGSEADNGGDMHGDEDDDDDDEVEDSELSLDSSVSSDEGAGGLMLRAYSNGGHRGRALAQVQRRMAKQYKEKARSGTVTPLESAVTHDVLRRLGELEQTNRELVQGMRAAEAAARRRSPRQWLADAGVVAQLVQVCVLVMVAMMLARREA

>XP_001750540.1_uncharacterized_protein_MONBRDRAFT_34615_[Monosiga_brevicollis_MX1]
MVEPNPGICSLTVASLLSSASTSSLLLLGLTATRRSGQYRRTVAMSDKAEGLAAPSGGASADTTPVPAPAAATPKAPEGNHSPGSDRGIAVPKSRLAPPAFGGSAPTSLSHTLSSYDDEDGISFISALEHEMPNSPTNDSNHLKYSSSRDSRKQYKLNRSRYEEEKQRMTDMSGYDMDERPYKTGIMKIRNTLRSWTKFYCELRHGMLLLYKEDRHDVWMGTVLLAGGMVMERPSRKEGHTFKFSHPLRAAIHAPRGPKGEIWFNLVRIPSDHCMFRVSTAQECEEWITAFRRSIFGPHPKYESRMAEPVISNFDTLRADVQSDDGLCASQHDLHHAHEASPRSNRRPMQAGENGLSSATRQQLEAQGQAAALAAESDLDHGEDLIPNWRADARDFTEPAPPIEVEENAWELHLSSLQHSPGQRIQEQQFTEEEVATVFERMGKVPVTEAVTLPAFMLEPRSELERLGDAFHHADILTDAAKHAMPRGRFVSVLRWYLSSFYAKASGALRPIPPCKGEVCRLMFEHPIHGSTPSSRVFFVAEAVEHGCAALHGSSRVAGWAVDGVINCSHHFTGDKLVSIERGQMEVHLARVAETFVMTRPAQVTSGLSTGHTLTTYNGSIELRCDMSGYRFKGSFDPNNQLSNVIEGTLFHNEEKIATLHGEWDGQVHIKTLDNDMHLLLDTADEEIEARRLTRRAIVAEELWGLPAVEDQPFTDSQALWSSCAELSGEDFENYIASLRTRMLAAHAPTLFHITNGQYRYTEDVGRPWDYLRDLYDYQSEGHLKCLTIQDTVTGTPRSSTLTPVQTLRNRKRPNSLSGLASVSTMDSDVFVASPRVGKSGGGRTNLASVVEEAGSGTPQGETNASEAPAATRRTPSVTVKSSPSANAATPAGAAGKTPSAEGLAQVTKRVARLESAFMMERALLVVVLAILLGISVYF

>XP_003079833.2_Oxysterolbinding_protein_[Ostreococcus_tauri]
MGRRSKGTGAVARKTSVWSCALSTAEDGSDDENDADDVERAAVERAARELRGKLLEEIVRGARKRGEGEAKAKAKYEDVLDDERVDGFGEAVLKLHDGDAAGDDDEAAIARMRAAASFVLGFCAEILQPANCESAAMMPPLGTHVIRRKKFDDEKSVYFQEQCSYDYDETRTADHFMDYGVQKVHASAKVQIVPRVSMSGSIITVNLERPKRLNVSESFSIREGCFVEFRGCSGHPDYLSKRVETSAADDGEIFEFTLPSIQISGLARGYPIAELVGEVMISSKASGLKTSLKFREFDVETSPSFRNIVSGSIVRSSDDVEVKRLLLGTWDTRVLLGNIFSRENGAPDEALFTAHDFGLPPLTTATGVRSLLSSLQKPGSMSNRRLWQTIVEALRFAPLREPENSVMSEALSLPSMATIEMRDEDKSMGYELALMVADSPLPDAEPPLPRYWFPRTKKSGKQLKKECE

>NP_194316.2_OSBP(oxysterol_binding_protein)related_protein_4A_[Arabidopsis_thaliana]
MAEEEKMRRQLVLAKPFSLEDEKDSELTASSVIRKILSLIKTVRPGSDLTNFQLPPQLILPRSRLQCYGEMIYSFGGQDLLGECSRRNIPIERLKSVVTWNISTLRPVVVGMSPYNPILGETHHVSNGYINVLTEQVMHHPPVSALHATHEQENIDVTWCQYFTPKFRGAYVDVEVNGKRIMKLLHHKETYEMDQPRLIMKFLPAPGAHWAGKVKIKCPETDLEAELHLISDSFIERFRGNNNRSIKGKIFESSSGNQLYNIFGHWDRTVMAKNLKTGGLEVIYNANENITGLKPPTVKNLQEVMESESTIVWSEVSEGILKKDWERAREAKILVEEKQREALKQREASGESWVPKHFSVVKDGKDWHCSPLQPTVPRAPLVITEK

>Cvel_23276
EMCPDGGGENGQAALPPARAAVAGGAAGKWPPQAFSEGMLHLRLAALHEEIRLRDLEADLNAGHQGFETMTDGALKVTDKSVMERQKGIMSDVMKEASKSLLEGKMPRISLPIRIFEPKSTFHRLSDLFSFAPLFLGKAARVKGGMSFEARLERFKFVVCFVVAGLHYGAGQLKPFNPLLGETFEAEWEDGTAIRMEQTSDHPPVTSYVICSPLGKARRRIRRRVEKRSVISGGGGGSMEEGEGAGKGNGGADGMVIGGRKEREGAAVPLPSETSSLFGPLEDGGSGSVESPDFGLGPDVSSGSGDVPPHIVDLDGRFVSDLLSAEAQQHPAPPATSGEKGEPAKGEAEGLPRAFSAAAASSRAAGGSGVGWVDWILYGSAGVKPSLGHLGNQTTFMQEGSNCVRFVSASGESQEVTFCLPSVRLSGMMMGTRSVALVGDCIFHDEETGLHLDLRVGGPDPRKAAGMFGRRPSLLAGSFAARIMRRHAETSKTSAAGHGGASEHSKQRHSSREGRTSSRTTAKPKRYSYPPTPSLFSDWPAAEQEKWSHATSSASAPPAANGNEKEKADASSPQSLVGWVEGSWVGSLLIDGRERWRLGQYRSIRYKDRGTATRSPAKQRGFPSPAPASGGPPAAVRSSLAVTVAVEPLQTPTVRGPGGEGGDLQVPPSPVSPHCEEATLQLPSDCCFRPDLLWLSAGNEEKAQKWKWEIEAMMRRDRHLRKEKRGHAHGHGSSHGHGSSSAPHASSGSGAAGS

>XP_003058953.1_predicted_protein_[Micromonas_pusilla_CCMP1545]
MGNCVCRPPRSSSEPVVASAIAAAAAEGAARLVRAPSSLERKATTTTTPLEVDRARVDGDDDDDDDASSYRSGRSSFASDDDDDDDDDDDDDGGDRVPSLARSPRNATTTTTTTKTTLAFAQPAPPPDTPPAMDARVAQLLASASEHLEDDAIERLCDDGDDGDAGAAAATTTTTTTTTKKKTKRKGALARVARVASGMRMMRSMTKAARAAGGSLDLTAFAGTPIRWHARTSVLRTHAVGESSLKPPAAAGAGGPASTRPPPRGSPGEQERRRPRATRLFTQLQRDFGARSRSRALREAARARGIAGEADRSRDDGDGGDGDGGDERKSKFSSPFFAVERQHSIEALEDFADLEDDHAAWDNVSVDYGDDGEVHGEVEVEVDVDADEARDVDVATTVPPPASTPEGRILRVVRALLADAEPPAHLQKPFNPVLGETARHELHLSNGVEIRSVVGDGWSVHGHFRARPRLVGLRVEIDMIGKRVFRVRVPPARAHAAAAMDDPVYETYDTTMVGFEWHFVPRMYVQMESKAPFVVRCRESGLRAEVRHKPRKFAEGASGGFRVIGRVFREADPERTLFAIAGRYDARVTATDLRGVISEETAALTAAKKKGRDRPEVGVLYDASEAARKEVAGFVKEHNWAHESDGVKATEAVWGEVIRAMEQRRWDDAKRAKKKVERDERGERARRARAGEAWTPRWFRWSEEEETWVLKEGAWKMERAEESAGGASAAR

>PPA1273456
MFGFGSKSTTTAAPTVTVSPVMTKEGSPLTEDTISDLSSDGIEGEGIESNDGGATDNTIIVDDNSSSDGVMKQAFSFIKNHLKVGSDMTKMPIPATFVAPMSFLVAIQQHSAIFTNVLMAANSIKDPEQRFLQVLRYHMTWPKMFFPKNPLNPILGEIYECEVNHIDEKTNLPAEGDKTKFIAEQISHHPPISAFHFSNEKHGITMESRQQITPVFKGKHIRAHMDVKTCTTLKNHNETYINDKFPDGFLRLLRWKFEFTGKYTFQCPESGYNAVINFKDKPILGGKWHDLHILVSKGSDALYEITGTHIDILNMTNLKDKSTSVFLNYNTVRQDTISEEPLEQLKENNSLKVWKGVADAFAKRDGRRAGLEKQKIEEAQRRKAKAALAQNPNYQWTPVHFETYTPENPLKPEHRYIGCPVKN

>XP_643140.1_oxysterol_binding_family_protein,_member_6_[Dictyostelium_discoideum_AX4]
MSAKVASNKEAPLTEDSVSDLSSDGVEAEGVDQTENSGADAMIDSEPATEAGVMKQAFGFIKNHLKVGADMTKLPIPATFVQPISFLTAIQQQSAIFSHLLTSAPYIKEDDQRFLQVLKYHLTWPKMYFPKNPLNPILGEVYECQVQHTDEKTNEVIQGDITHFTAEQISHHPPISCFNFYNDKHKIKFDSKQQITPVFKGKCIRVNMDVKTCITLEREGGVTETYFNDKFTEGYLRLLRWKFEFTGKYNFVCPETGYSAVINFKDKPIIGGKWHDLQIIVSKGTEPIYDIHGTHVDILTITNLKDKTSGVFINYNTMRSEPVIEEPMEQLKENASQKVWKGVAEGFAKKDSRKAGLEKQRIEDLQRKKAKVNLAKDPNFIHKPHYFIHNPNLPADCVKPDYIFKKPVESSTPNLSKVDSSAKIENSIPVDNSIPQTTN

>XP_644084.1_oxysterol_binding_family_protein,_member_5_[Dictyostelium_discoideum_AX4]
MEKDSKVIEKEGNKGFTKSIISTVKNIKLGYGMDIYQMSTPASLIAPYSSLTYISDSFSKNFEILIKANSIENDLDRLLEIFKYITTIFIINNNACGKPIVPIVGETQRFKFSNKDEDGNEFNDSFHCAEHVQNSPFPLSVSSTVNEKEGIELCYNYAAKILFMATYFRINIDEAETFIKFNKFNETYNIILPTLYTRIFRGFSEYSGKLKIEPTKSNYYIDANFQSKPLIGGKYNYFEAYVSKKDTDEKIYKIFGQWDKEQQILDFENYQTDFFFKRPQQFYEKQLPNEILPTDSSVVWKGLIDAHNCGNNKLKLKEKTKVDEDQKLIENQRKKENINFKPKFFIKNKETDKWELDKFNKY

>PPA1417400
MGKSKNLEDVGETLPHETVAHTTTTTTNATSAAAEDGEEGGTLIGSIIKNIKVGGDLTSINIAGSLVLPKSSVCYFSENSSPFFNILIKCNDIEDDYQRMLEVFKYLMTTRWLPKELTKKPLNPVLGETFEANVKYSDSDAEITAFAEQISHHPPCTSSEIYCRKAGIKVNYFTPVKVNFMGTYIKLTLDGAVQIHFEKFGETFSCTSPPVAIRLFRGFSEYAGESVLTSSKSKYRIKATYYPKPLLVGHYNCLEATVYNGEEKIQRIKGQWDEELKIAPYKDKKAEYKTFYNKKEYTPGEVVQVSADKQLPTNSNVVWGALFDAIKTGQPGKAINKEKTKVEEEQRRKAAERKEKNEQWKPAHFTQDRDGFWSLNPELHK

>PPA1411810
MAKEENFEDVGEEIPEEFKKVDGATTTVEEIDEQVDKGGATAGNSAITSMLKSMKVGTDMSNMVMPGSFILPRSTLGYFAENCSGYFDQLIQCNAIDDPMERMLQVYRYLMSTRYIPKDVSKKPLNPVLGETSELKTNFPNINATAHSLCEQISHHPPISSSIVYGSGVSVAYYSPIKGAFMGTYIKLNLDGHLVIKVDKFNEEYHCTLPSMAIRMFRGFGEFIGNSTLTCTSNNFSIQTKFLPKPLLIGNYNVIEGKVFKGKDKVFKLKGQWDGEVKISPYKKDDYKHFFEKSKLTPGVAEPIPEIQLLPTDSTKIWGGLFAAAKSSASSRDITREKTLVEEDQRKKAQERKTKGEEWKPNHFTQDKEGRWILNSFKN

>PPA1405392
MGKKSKKVEVEDVGEDIPEELKKELTTPKTENALNIDEIDDQMENQSRFTVLTSVIKKIGFGADLTSMTVPGAFILPKSALSYFAEYYSSYFDILLKANEIEDKQERFIQVVKYLFTACRLPEDNMRKPLNPVLSETYEGDIIFEHEQQSDNNNKTSGEDDIDDDSPDSKGASNSCTFFCEQISHHPPISCSTVYNKEAGIYVSYHDQVKSTFMGTYAKLSFEGTVRIRFDKYNEVYTGTCPSMAVRIFRSFSEYVGKSKLTVNTSSLKCKSVFHPKPLLYGSYNTFDTTIYNGKDKIFKIKGQWDEIAKISEYKKDDYKILWDRRTMKQGAMRGPEVLLPTDSSIVWKGVFEADKLDSGTSAKTITKEKTKVEEAQRKITAERKQKGEVWKPVYFEQDKNGFYFLKNYKSQN

>XP_641237.1_oxysterol_binding_family_protein,_member_1_[Dictyostelium_discoideum_AX4]
MGKKDKNVSVEEEVDEAEIEKLAAENANKPAPQLTKEDLDAMDDAEPGTSRLALIGKMIKKVSIGTDISNISMPGSFILAKSTLSYFSDNFSSFFGELLKANKIDNELERMLQVQRYLFTTLKETEDTTRKPLNPILGETWQANIHVKDGDGNDVTDNYFFAEQISHHPPISSSTVYNKKEGVNCTFCLPVRSQFMGTYVKISFEGESHITFEKYDEKFTFVAPPMAIRIFRSFSEYVGKGILKSDKNDYLIKSTYTSKPLFGGVYNGFESKVYKGKEKLYKIKGTWSGDMKITNLKTNETTPFFTRPTESAKVVFPDDGNTLPTDSSVVWKGVFDASKKDDVKGMSQEKVKVEEEQRKLAHHRKNADEWKPVHFNKIDGRWQLVNLKD

>XP_646418.1_oxysterol_binding_family_protein,_member_2_[Dictyostelium_discoideum_AX4]
MAKTKILNKNNKKEEIIDQEENEVDVKTTCKELSPPTDLEIENLEKLENSGASRLHIVLSFIKKNGIGIGTDLTHFEFASSFLLPHSTHEYYSDNMAREFDILLKSNIDNEIERLLGVFKYILSIKPIIEDSTRSPLRSVNGETKSSNFHVTIIDEQDKSEKIIKDNYYMVETLDQEKAFVGSCIYNKREGVKVHFNTETKTIFNGTNIKLPIIGNIIIRFEKFNEEYTITNPTLYGRYLRGFVEYCGETTITSKNSKYYIKKTNLAKPLIGGNVNMVEAKLLYGDDPNPLFKINGSWSNEMEIINCKTKETKLLYKRPFNYFTKIIPDILPTDSSIVWKDIIVPISKGEKINISKERSKILEYQKKLNWKISQFHLNTDNNIWEPIIYKD

>XP_646419.1_oxysterol_binding_family_protein,_member_3_[Dictyostelium_discoideum_AX4]
MGKSDRKLTEENSIENGVKPGKLTEEEMDAIDNSSQSKIVAIASMAKRLGLGLGSDLSQVEYPSSFIAPFSTLNFFSNNFANHFNILLRANKIENEMDRLIEVFKYSTTIHKIPEDCMKVPLNAVIGETQSLNFQTPDLNSPNDLISDNYLITEQVSELPPNTATCIYNKKEGVKALFNHESKIVFQITNVKTPTTGRKYVRFDKFDEEYDIEFPVLHSRFMRGFVEYCGEGSIKSNKSKCFVSTNYIAKPLIGGNYHAYEAKVYNGIDSKPIYKISGQWDGESKITNLKTNETKPFFKNITTTTNFTPTILNTDSSVVWGKIIQSVAQGKPINLAREKSKIIENQKTLNWAPSQFFLNLEMGVWEPKLLND

>XP_639892.1_oxysterol_binding_family_protein,_member_10_[Dictyostelium_discoideum_AX4]
MTDISDESNIGYEEEVEEEIMEDDLDINNDGCDGEDKKKNSGFLKQFASKQPFYKMSLPISYSEPRSFLEKLSDQGSFLDILLKVKNIENEDDRFLEILKFYLSGWIQQKIAKSPFNPVIGETYQCKWVHKDGSTTEYIAEQISHHPPSSSFCMHNQQNGVIFHSHLSPTSKFWGNSLENSMEGKLVYEIPSLQEEYIVEAPKIIVKGVLVGSLSTETVGSTNLTCKKTGYSAEIEFKGKGLFKSKHSLLVKVKHPSSKKALYTLEGKFDGTVSITSTKTGKTTAFFDINSDQIQPITSPLHELEENNSRVVWKHVIENLLNNNEDEASKQKTIVEENQRNLAKTREGKPWIPKNFIKVDNDDNEDSANQNNVYYYSKLIEIRKEIMKNN

>PPA1275952MSNSVEISSEESQKWNEEENIEEDGVSDENVNDTPKDKKMKGAMASLMKQMVSSKQPFYKMSLPICFSEPRSLLEKFTDMGKYFELFINASQQETEEARFLEILKFYLSSWLVQQDVRNPFNPVIGEVFSCHMEHKDGSTTHYHSEQISHHPPSSAFCYTNKKNNAIFHSYLQPTSKFWGNSFESCMDGKLIFELPKYSEEYLVDVPKIAVKGVVLGTLTTEVSGSTVLTCKKTNHTAEIEFKGKGLFKNKNFMIAKVRHPSSKKSLYTLEADWDGKINILNSKTNKTTTFFDINSFKTLDMVVPPVAEQPENFSRRVWGAVIKNINADNEEEAQAQKHLVEEAQRTQAKERIEQNNLDWTPKHFIKSDNTYIHSQLSNFKNRNFITSNFFKLLKNTIHNIRMYTSSLLRNVNKTVATFNSIRGFASKSGEIKVKFPRKYETYLCDGPANECTTTKEELITHFTDMTRMRRIEMVADSLYKKKLIRGFCHLYNGQEAVCTGMEAAITKNDHVITAYRDHTFMLARGATPESVLAELLMKSTGCSKGKGGSMHMFTHNFYGGNGIVGAQCPVGAGIAFTQKYNNTGNICLTYYGDGAANQGQLFEAFNMAKLWDLPCVFICENNKFGMGTSQARAAAGSDFYSRAHFIAGMKVDGMNVLAVKQAGKFVADWCRSGKGPFVLEMDTYRYVGHSMSDPGTSYRTRDEVNEVRSIRDPIEYVRGLLLEHKLATEDDLTAIEEAAREEMDKAAEFAINSPMPDMRELYTNVYKEEVPIRAVELDQSFRP

>XP_635285.1_oxysterol_binding_family_protein,_member_12_[Dictyostelium_discoideum_AX4]
MSTETETHLGESKRVILSSLIKQLSPNKEIKHMVLPCFLLQPRSTLESFTDMFTYIDELYKINEIDDEGERFLQFVKFYLTGWHTRPKGICKPFNPVIGEEFECFWSNNKNEDLPHIDELIEDNNSDVGVFKAEQISHHPPLSAYVFYNKFQKILVNGNICPSYVKFMGNSAESHLQGILEFNFFKWNECFECTLPTVGVKGIILGKLSPFTCGDIEIKSKNSKYSCKLEFLFKGLFGSSKNINGIKGTILYDNKPIYKVRGNWDKQIFIKKINEIAGTHGGSSSGSHTNSTERCLMDVSLLKNSKEKYTKPIEQQPPNSSYHLWELVTKNINNNNDKETAEEKAKIEEKQRKEESERREKGILWEPKEFHFKENPNNEYKTTFYYNDIPKLFDNLQSKPIQ

>PPA1371520MSKLFKRFGSSSESNIQTVPEKVTSTEDEETLTESKKDILMHLIKQIKVGSEIKHIALPCFLLQPRSLLESLTDNFNCLEELFKIQTIENEQERFIQFIKFSLSAWNTRPKGIKKPFNPIIGETYDCFWDSGDSNGDSHFISEQISHHPPHSAFCFYNKKEGIIVNANLSTNYVKFYGNFAESSLKGTIVYHFLRTNDTYEMTMPTIGVRGILLGKLGSYVNGKTVIRKMGTSYTANIEFLSKSIVGSSKHHNGVKGTIDFENKHLYKIKGNWDNQVIISPISHGSDIVLLNVHNVKLYPHKSIPFDQRPETDSSHIWKIVEEGILSNNDQVTSKEKQRIEENQRKDEQYRKDNGIKWVPKNFVLKGNPLDFPPNYVYKELENIFPEVYASKPTS

>KXN73481.1_oxysterolbinding_proteinlike_protein_[Conidiobolus_coronatus_NRRL_28638]
MMAQKSPNPSENSEFIKTENLGFDENDNSDKGRLGFIMTLLKKLIGVSDIANLRISLPAQMLDPIPNLEHYTWLDRPDYFACLSQPEDPLERMIGVVRYCFSKELKFAKENIKKPYNSVLGEKFLCHWNVPLPNATDEKTVKVTMVSEQTSHHPPISAFWYECKETGVVACGMDQVKAKFSGTSFKVEPGSTAKGIYITLQNHGEEYHISHPSGQIQGILTGSPNLAYQESYVISCPQTKLRAFIEFKPERWIGKSRYLIEGKVFNFEPTYESSKTEPDMPPSSFKLSQVKDEHTLVNFWGSWRSKVFYNHGHTTKEEKLLIDIEEHDIVPKIVKPMEEMEEFESRKIWNEVTVNIKSREFSKATKAKQAIEDAQRKRTALRKEKGEIHEPEYFIISEEQPHKPILKDNLDLKF

>PIA16692.1_hypothetical_protein_COEREDRAFT_81057_[Coemansia_reversa_NRRL_1564]
MMGKDKGIDTTPRNSMSADSEIQRQKIVGDAVEHTEEVHIDGDQSKFSAILGILRKLIGVADVINLRVSLPSQLLDPIPNLEYWNYMDSPEHFVAITEPDDEVERMLAMLAWWFSKLLKHTGKVHKPFNSVLGEQFFCKWEVGGSGLTPTATQTTTGNANANSSDAKREDTAASSITNVSAGNSSSGGGKLNVEYITEQVSHHPPVSAFVYRCKERGIEAVGMDHIAAKFTGLSATVATGSECHGIFVTLKQRNDEMYKSTHPVGSIVGWMRGTLKVQLIESSYIVCAKTGLAAIIEFKEERWFGKNKGNVTGKVFRYDDKAHGDKIAGWRLKDIPKTCTTVATFGGNWDQKVMVQRVDGASKDDAERLLIDMTVLQAAEKQVKPVEEQGEMESRRIWGPVASKMLEGKFSEATRIKRGIEDKQRALAAARKERGEAVVPALFKPDYASNGKPELLDNAPINI

>XP_011389363.1_hypothetical_protein_UMAG_02962_[Ustilago_maydis_521]
MSAATDTPAVATSDKDASADEIAAAPEAVQMTDEEELGAASDKDQSDSGKLKTLMGILKRMVGVKDIAAIRISLPANLLEPVPNLEYWNYLDRGDLFTLVADLDDPLDRMLAVLRFTFTKELKYVKGKICKPYNSILGEHFRCHWDFEPVKFIDSQVLPVQALSTDKPEPLPLVANQARTPTLTAKKGSAPPSPLVQAQDNKSRPTSIKGVSLDTSNSASIPKKGLSKLLGRKKSTVKEASETQTSAASATSADASDDLDNTPTSDNASVFGTISQPASKQRLCFLTEQVSHHPPVSSFFCEAKDAGVQLYGVDQLGAKFTGTSVKVFPGEQNQGIFLRLTDKAKCGASGEEYQITHPSASINGLLRGSLWVAICDNLYVTCRGGKRDKPEGDDGTRLRAVIEYKDESWITKAKYALEGVIYAYGPNDDPDEYTSVKQVPQDKVLFTIEGCWKGRITYKKKGDKEPRLLLNVNDVDPISKSVRPLSAQEDMESRRIWEPVTQAILAKKYSEATKHKQDIEQKQRNAAAERKRKNETFIPRFFDADISDGRPKLTEEGRKALNGEYGLVGYEGASTEKVDDVAHNDVDEDEFQDAEN

>XP_012048511.1_hypothetical_protein_CNAG_05117_[Cryptococcus_neoformans_var._grubii_H99]
MSTTSLDKVPDVPTDDDATVKQFTDETGAPASLPEIGSGGEESKLKVLMGLMRKLMGVKDVANLRLSLPASLLEPIPNLEYWQYADRADILAAVGDSDDELERMLAVLRFSFSKELKFIRSRLGKPYNSALGEHFRCSWRLPSLLIDNETKEPVVRTHIHVPLPGEPFYGGQGGSGWTTPVLRPEDGGKPNSEASSIISTSSKASKKQPVKTLDPTSVDRVIPGPGKEVEADPDAGVLESEKVTVVFLCEQVSHHPPISAAYYYCPEKGIEAYCMDQIAAKVSGMSVRLGPGSSNKGIFVRIVRDGPGQNEEYQITHPAAAVNGILKGSYYGTISDVVQITCRGGAKTTTKLKALLDYKEESWLGKPKFLVDGIIYRYTVGNEEEEGWTKAKQVPADKVVGYLEGCWMKQIRYKLKGQKEWKVLLDLDQLALIPKDVRPLHEQDEHESRKLWESVTENLISKNWGEATKSKQTIEQRQRDKAAERKAKGETHQARYFQPDYEDGRPKLTDEGQKALEDEIQRCRGQ

>XP_011395314.1_oxysterol_binding_protein,_variant_[Neurospora_crassa_OR74A]
MFSAFTGRSPAPAAVPADGSAPAAEEHPSDGNKLSTFLSILRKFIGVADLASVRFSLPSQLLEPTPNLEYWNYLDAPNAFVAIGTADEPVDRMLEVLRFWFTKDLKYAKGKPCKPYNSCLGEFFRCNWETDDDAPRINTKAAEDTISRPSSVKSGSSRAASTVSVPATNPKPSKPVRISYLTEQTSHHPPVSAFYIDCPEKGLHAKGFDQITAKFTGTSIKVMPGEHNLGIFITLEKRNHETYQLTHPPAHLGGILRGALSVTVGDMAYITCPETKLKAILRYYDDGWLGRTTNKVEGIIFKYDPENDDKMQIKDVPQEDILVRLGGPWKEKVVFTVGPKPLESHPPDQQTTIIDIAPLSVAPKVLPPTEQQLPNESLTLWGKVTEAILAKQFSRATTLKQELEEAQREKAREREQKGESWQPVFFVTATDKAGKPALTEKGREVLKRAQAGDWSLDGIFEKDAKAADAAK

>NP_595366.1_putative_oxysterol_binding_protein_[Schizosaccharomyces_pombe]
MPNPNQAIKKENEPIQVENPTELVRDDGEVEGYQKEEGKFKLVLSILKQCIGVKDIASLRFSLPAQLLEPVGNLEYWNYVDRPDYFAVMGDSDDELERMLGVLRWWFTKDLRFVRGRVVKPYNSVLGEFFRCKWVVTDPTVREDHTLDPDSSQLPTYKTEYSETTKFPLGKSYRPKASRTTSSQSVASTMTKSSTKTSKKKSSKKNSKSESNQDSSNDRSSTAPSTAESNNEHLSSSQKSKHSIVFMAEQTSHHPAVSAFYVTCPSKGIEVYGQDQIAVGFTGTSFKVCAGDLNKGVYVRFNKRDNEEYLCTHPSASVGGILRGNLHINLLDSTVILCPKTRIKTIITYIEERWLGKPRSLVEGVCYRYDPSNDTIDSIKAVPKENILATFKGNWRNCIFYSYAGESESRMLVDLNELDLVHKRCPPLDKQFPFESRKIWFPVTHNILAKHYTQATKAKQEIEDQQRQASAAREESHTEWKPRFFVPDEKEGRPTLTEEGKKVLEQSLSDEYIHGS

>XP_006678036.1_uncharacterized_protein_BATDEDRAFT_34908_[Batrachochytrium_dendrobatidis_JAM81]
MSTVNTPKNTTTPIATNVPEHVEFNGNGSKFQFIASLLSRFVGAKDLVSMRISLPANLMEPQSNLEFWNYVDRPDIFVSIPDGVDPLERMLRVIRFWYSKDTKWKDHQLRKPYNPILGERYICHWKVPCDPNIAHESLTKVSSAADLDQSDKAQPPSKETTLFCINEQVSHYPPISAFTYTTADARIVASGLDHVVARFTGTAFKVGPGEYNSGVYITLKDHDEVYNITHAWATVHGLLTSSPYIVVSEQTVIICPKSGIKAILQYVEESYFGRPKFAINGKIFKYDFQKNSNLTPKQRKDSEKLSLVPKEDLLCTLSGQWNGQIFYRLAGSNEDILLFDMKTSDVEPKIVQDLANQHELESQRVWQKVTEALLKKDFTTATKEKRIVEDRQRHAITERHKLASPAYTPVHFDFNYDFMQANGVAGPPVNFDKGHPRLKPGVLEQLVSQTKTTNIIKKIKTENIEVNSQESIASPASIPSARMQTETIPL

>XP_025179623.1_oxysterolbinding_protein_[Rhizophagus_irregularis_DAOM_181602=DAOM_197198]
MDLDSTEINDKTLDHLISERHRRITTSLHLEENDYDEHQSKFKTLSGLLKNFIGVKDIVSLRISLPAQLLEPIGNLEYWNYNDRPDYFVCIGDSDDPLERMLASIRWWFSKDLKYVKGKLVKPYNSILGEQFSCHWDVTSPNFDNKGNFIDDRESNLSGISNGNQKYRVTCINEQISHHPPVSAFYYQCEEKGVSAYGIDQIYAKFTGTSVKIGPGEQNKGIYINLDKRDNEEYLLTHPVALVQGWLKASLYIAVGESCIVTCPKTKLKAIIEYKEEKWLGKPKFAFEGKIFKYDPKNDDINKLKNVNDHNVVAEITGSWRGQVHVTRCDTKVSRLLLDMEKLEAVPKQVKPLSQQGPLESRKVWQPVSSALFSKDYAKATKEKQIIEERQRQKASERKTNKQEFVSVFFKLPVINGKPELKSAGINALK

>XP_016604902.1_hypothetical_protein_SPPG_07694_[Spizellomyces_punctatus_DAOM_BR117]
MSGKDKMDDKTAATVAMETENLDHAEGTSKVKFVFGMLKKLVGVKDLSSMRLSLPASLMEPESNLEFWNYMDRPDYFVTIPDGEDPLERMLRVIRWWYSKDTKWKDQRIRKPYNSILGERFLCWWDVPLNDVSPSAEPRSSTSTDQTNTDQESEKTLVDDTPLKVTCITEQISHHPPVSAYYYECKEKGIIGRGVDHISARFTGTNIKVGPGAQNHGIYITLTSLDDEEYNIQHPWASVTGWLSGSPYVVVGESAIITCPKTGLKAVLEYKEESMFGKAKFAIEGKIFKYDYEADKSYTDKERKEKEKLSKIKDKDVVCRLYGQWNGQIFCVKTTQDSDAKPRLLFDMHTSTPAKKQTLPLEDQHPLESRRIWEPVTSALLAKDFTLATNEKRRIEDAQRKLAAERAARDEDFVSEYFEFKGDRAGRPGPPVDMNRAKPFLKEGKQFVCK

>XP_959584.1_oxysterol_binding_protein_[Neurospora_crassa_OR74A]
MDHKSVSSRVRDLAKFLSTVKGDLSNITGPPHLLAPSSVVEVGHCWAQRPSVFAAPSLESDPEKRMLLVLRWFLIALRSQLYIGSTGSKSSSIRKPLNAFLGELFLASWTDAEKKCTTTLVSEQVSHHPPITAMHVSDAEHGIRSTGYARVEMTFNGTVNIRQVGNAVLHIDRFDEDYLIPLLDAKVRGILSGCMYPEVLGTYSIIGSSGYQAEVKFTGEGMIRGKRNSFEARVFHRDDPSKQTLYEVKGCWSEGGWTVRDPRMGETVEVYDIDAPENQPVPIVVDSLAEQDPWESRRAWDGVFRGMAEGDMRMVLNEKTRIEQAQRRMRVEEKERGIVWEPLFFKSVQPEEHEVFHRLTEGTGLKLLSERTKGVWKPDLERIKKAQRPFRLGVTPLGYC

>EPZ31007.1_Ribosephosphate_diphosphokinase_domaincontaining_protein_[Rozella_allomycis_CSF55]
MFHGIYCVVRGELYSACVDPLNYKLVLAPLILYILERIHREISARRSTFVTKIILHPSQVMEIQMRKVAFKSFAGQYVFLNCPDISKFQWHPFTLTSCPKEDFISVHMKIGGDWTFALANKLGMKTLTQSPEEFVSIPPHLTPKILIDGPYGAASDKICNYKVVLCVGAEERHRFDSKEKISLKKVYFVAISRDTKAIEDEDHDNLIEIYQYLTGKLLLDQIHGYLAHGGAIDGADPITGLHSPTYFGRPNFDQIFQKIKARHTDMILATMGPSLFLIKKIFDHTLNPCNLNDRSFIKQIASATGDLSSMSCPSILLSGQSLTEYSAHWMDHPDLFILISSYENSLDRMIAVVRWFVSQLYGAYASRWTKGKNEKKPYNPILGELFFGSWETKNDGEIKMCCEQVSHHPPVTAFYFENKESGTFLVGNCGQKTKFTGTAIKVEQTGSLTLYLEKWKEEYTVSFPELHLRGIMNVSMFLELTGNSRIVSSSGLSAFVDFIPKPWFSGEYHTLQGYIFTTNNEAEKLVYLNGKWTEKVFHSRNTETFECLLFDAESSSIEQPKVKPIEEQSENETFKVWSKVTEALKAGDYNKATKEKNEIEEKQRSIRRSRQEKGEVWVPSNFHFVEEESLKNLSPGGLFSIKPKENNEFSSKSEGRCSPINDNLMELLLMIAACKESSAKKIIAVMPYFPYSKHSKKKTSRETIAAKLVADMLEVADLHTPQIRSFFNIPVDNLLVDPILSKFIVENIPDYKNAVVVAKNTVTSFADMLCIPFAIIHDDHLKAENDHHIYICTQILNFIFKDDIIDCADTFILSANLLKQRGATDIYIIATHGVLSGDSLSKINSCGDILKLLITNSLPVNEESAKLVVIDMSHIISEAIRRVNNGESISFLFHNSI

>XP_009495546.1_hypothetical_protein_H696_03405_[Fonticula_alba]
MSEDNVVPTSQKGSFTTFLKTIASTTADLSTLSCPAFLLEGISVLEHTTSYMMVPELLFNINKESDPVARMRAVVAWWITNVYQSYGAPFAGGSSVKKPYNPVLGEQFHCTWPKGGPVESEVHLEAEQVSHHPPVSAFYLECPEQRLCVNGSIFSGARFRGTSVRVRIYGHVVLRLQDHDDEYRLTYPEADLRGLFTGQLFAELSGMATITSKSGYSATINYLPKPWFHGSYHMINGFVSPSSSHNVDNALFHISGKWVGRVMWNEAGSKTQNLLLDVDTLVNTNPTVPPLEEQGELESQKIWAPVTAALRVQDYSTALAEKNTIEEHQRALRRQREADGTPFQAVHFDNITDMSQLIPENDICEETGTVISYYWQHKRMLQ

>ORZ30340.1_hypothetical_protein_BCR44DRAFT_95178_[Catenaria_anguillulae_PL171]
MSTPKLNDTSAAADSPVDPDAANVVPASHRSQFTQFLKTLTSFTGDLSQLTCPAFLLSGVSLLEYSAHWADHPDLFYAIAAHTDPVDRMVAVARWFISTLYGSFHSRCKTGTEKKPFNPVLGEQFYCWWPADDKEGVPETRMVCEQVSHHPPVGAFAIENDKKNIFLNGHCGQKTKFKTTYIKVEQTGRAVVTVFPPDGSVDEYFVTLPEMALRGLLSGQLFVELLGKSSITSASGYQTVFEYVPKGWFTGEYHSIKGTISKLDLPGGPLLAEAAATLIGTDASGEDAGGSPTSTTSASSASSTTSSKKASKKARKMAEATMQSAISEGEVLFEVSGKWTTTCVATRLEDGAEEILFDADEHEMQVPQVKPLEHQTDLESRKLWHKVATALNAQDYQQATAIKTTIEDEQRALRKARVERGESWAPKNFVFVSDGASAASKSSETGGGSDAGSMHSLASSKMDLAGPGLQARAALRGLSVIAVGGSGGTEALVDEGLWTFVPERPASSMS

>PIA16851.1_Oxysterolbinding_protein_[Coemansia_reversa_NRRL_1564]
MMSDTKSVGSGASSSSNNKNGASPNEPAGNIVPTSYSTDFMSFLKGVLSFTGDLSSLTCPSFLLNGISLLEYGAHWSDYPHVLAEITKATDSVERMKLVARWFVSTLYGSYNKRVAESNTGEKKPFNPILGEQFLAAWDDPTYGETKFTCEQVSHHPPVSAIYFENVKAGIYGSGHFSQKSKFKGTTMKVVQDGRVTLRMKNSDEVYCLSLPNLNICSILSGKPFLEMSNTTFIRSSKGYTAEFHWHTKPWLYGEYHKFDGKILKDNAAKFVQDGPGQEYLFAMKGKWVGDSYVVNQKTGEEQILFDVGAQPAAGIIIKPVEQQSELESRRVWQKVSKALTSGNYDVASKEKTDIEENQRKMRRERVEANKEWKPTLFTWVDDADAEENVKSSYAYLNSAVSSVGTGSWVFNNSLQSSAKSKSVSEVSGTQTPSDAFSTAQSSVL

>XP_025176226.1_hypothetical_protein_GLOIN_2v1627868_[Rhizophagus_irregularis_DAOM_181602=DAOM_197198]
MDNSGEKDDIQVPESKKNEFSGFLKTLSTFTGDIYSLTCPSFLLSGVSTLEYGQYWADYPEYFAAISQPADELERAVAVLRWYISTLYGSFASRKDKDKIEKKPFNPILGEQFLARWEDRNGSGETILSSEQVSHHPPISAVYLENQKAGVSANGHTGQKSSFKATAARIDVIQVGHVIVRMRDHPEKYLITLPSLQILGLWRGAPYVELSGTSVIQSNNYNILIEFSGKGWLSGDKHTFNGVVRKNGSKEQLYVATGTWSGKSNLENCRTNEKTIFLDIQSSQRAVPIIAPEEDQNALESRKLWKYVSQAIDSGDFATASKLKGEIEQRQRDKVKNGEETILQYFDWVEDDQVFLNLNNLINNKYQIEEKYREKGSWVFKKLSFEQ

>NP_595231.3_putative_oxysterol_binding_protein_[Schizosaccharomyces_pombe]
MSETSEQMEETVQSGNEPISKSTWMGFIKNLATFTGDLSTLSAPSFILSGTSLLEYMSYWFEFPELFVTIVDFPTPKERMLAVLKWYITGLSREYASRNKNYGTEKKPLNPILGELFYGSWDSSKGKVELTAEQVSHHGPESAAHVVCKEAGITVDTHNKYRSGFSGRTVYVNQLGQLRVHLEKYNETYYITLPNISLEGLWFMAPYIELYGSTYIVSNTNYITKIDYSGRGYFRGTKNSFKATIFEKNEDPDYIVEGVWTGESKLTIPSLKSTIFFLSIPSLEATPITVKPESEMGDWESRNVWKEVSAALASGNYDIVSSKKSTIEQSQRDMRKKEEAEGAVWARRYFKWEEHDSDARNALAQAVLEVIEPGFWIYIGDTHPSLPAGEQPVKRME

>NP_015180.1_oxysterolbinding_protein_KES1_[Saccharomyces_cerevisiae_S288C]
MSQYASSSSWTSFLKSIASFNGDLSSLSAPPFILSPISLTEFSQYWAEHPELFLEPSFINDDNYKEHCLIDPEVESPELARMLAVTKWFISTLKSQYCSRNESLGSEKKPLNPFLGELFVGKWENKEHPEFGETVLLSEQVSHHPPVTAFSIFNDKNKVKLQGYNQIKASFTKSLMLTVKQFGHTMLDIKDESYLVTPPPLHIEGILVASPFVELEGKSYIQSSTGLLCVIEFSGRGYFSGKKNSFKARIYKDSKDSKDKEKALYTISGQWSGSSKIIKANKKEESRLFYDAARIPAEHLNVKPLEEQHPLESRKAWYDVAGAIKLGDFNLIAKTKTELEETQRELRKEEEAKGISWQRRWFKDFDYSVTPEEGALVPEKDDTFLKLASALNLSTKNAPSGTLVGDKEDRKEDLSSIHWRFQRELWDEEKEIVL

>NP_014880.3_oxysterolbinding_protein_related_protein_HES1_[Saccharomyces_cerevisiae_S288C]
MSQHASSSSWTSFLKSISSFNGDLSSLSAPPFILSPTSLTEFSQYWAEHPALFLEPSLIDGENYKDHCPFDPNVESKEVAQMLAVVRWFISTLRSQYCSRSESMGSEKKPLNPFLGEVFVGKWKNDEHPEFGETVLLSEQVSHHPPMTAFSIFNEKNDVSVQGYNQIKTGFTKTLTLTVKPYGHVILKIKDETYLITTPPLHIEGILVASPFVELGGRSFIQSSNGMLCVIEFSGRGYFTGKKNSFKARIYRSPQEHSHKENALYLISGQWSGVSTIIKKDSQVSHQFYDSSETPTEHLLVKPIEEQHPLESRRAWKDVAEAIRQGNISMIKKTKEELENKQRALREQERVKGVEWQRRWFKQVDYMNENTSNDVEKASEDDAFRKLASKLQLSVKNVPSGTLIGGKDDKKDVSTALHWRFDKNLWMRENEITI

>XP_957875.2_oxysterol_binding_protein_[Neurospora_crassa_OR74A]
MDSAQQNSSAAAGGGSSWGAFLKSIASFNGDLASLTAPPFILSGTSLTEFSSYWCEHPPVFAAPAKESDPAKRALLVLKWFLTTLKQQYASRSEQYGNEKKPLNPFLGELFLGKWEDEAGVTELISEQVSHHPPATAYNITNLPTGVRLEGYNAQKASFSKTINIKQIGHAVLTVPSPTSDQPDTFLITLPSLHIEGLIFGSPFIELDGASYITSSTGYTAKIDYSGKGWLSGKKNSFVASLYPTGKEKEVLYNVSGQWTKSFEIHSGAAKHNSKSTLVDSWDPEKQHHTPLTVAPIEKQHPLESRRAWSKVANAILKGDLEAVGQEKSRIEVAQREARAREKAEGRMWQRRYFSVHTDAPDRVLALLGPAIGLAEHGDADKTGGLWRFDATKAEKEREQPQLSDEEASKIAKELLGQ

>NP_001342777.1_putative_oxysterol_binding_protein_[Schizosaccharomyces_pombe]
MSKTTSSDDSRDGEGDKRLRSTTKSTWLSFLKSIATFSGDLSSLTAPSFILSSTSLIEYSAYWAEHPELFISLPRGETPLERQLLVTKWFASTLKNQYAARNERYGSEKKPLNPILGELFTGKWNTDIGEDTELTSEQVSHHPPITAYHIYNKKAGVRLEGYNGHKSGFSGPQIHVKQIGHARLILEPHNEVYYITFPLVTLEGLWYGSPYIELGKKSYIISTSGYLTTIEYSGKGYFTGKKNTFKATIVNAKTKSEPIYRIEGSWTGMLKYCTFEDQKRSAWEDFLDCGNYKPVNISVAPIEEQGEYESRRVWKNFAVALDAGDYAAASQEKSKIEEGQRELRRQEEEHNEVWHRKYFEWKDKDEGFEEATKCLRQPVKEGFWYYLR

>XP_011390093.1_hypothetical_protein_UMAG_11086_[Ustilago_maydis_521]
MGEEDIGEAVPKEQRQGWGQFLKQIATFSGDLSSLTAPSFILSPVSLVEFPAYWGEHPDEFAKISTGKDEIERMNLVLKWFIGTLKGQFTARNTSMGSEKKPLNPILGELFLGKWPDKNDRGETTLTAEQVSHHPPVTAYHIENRKAGVTLEGHCAQKTSFSGRTIQVKQVGHAILRVKLAGSDKEELYLITLPNLLIEGLWYGAPYVELTGNSYIQSTTCLLTTLSYTGKGYFSGKAHSFKATIGAGGNALYTVEGEWAGVSKYKGKSVSGGSNELFWDASTQREEVSVEAVEQQGEMESRKVWKTVAHGIRSGDFETASKDKARIENAQRQKRKDEAAAGTPHQLERFVHLDNDQEYSQLAAMFKGQPATEDGYRSKPRVH

>XP_012050719.1_oxysterol_binding_protein_[Cryptococcus_neoformans_var._grubii_H99]
MSARPSAHPSRRPSSTSIRSALEENKPEGADVPEEQKAGWASFIKSLARMTGDLSSMTAPPFILSPTSLTEFPAYWCEHPTAFASISEGKDEFERAERVLRWFIGTLKAQYTTRNEKMGSEKKPLNPVLGELFYGVWPDENGRGETKLIVEQVSHHPPITAYYIENAKAGVKLQGHSGQKTSFTGTAINVKQSGHAILTVKPKNGHPEEKYLITLPKLRIEGIIWGSPYIELTETNAIQSSTGYTTQIDYKGKGYFSGKAHSFKATIAKSGKTLQSYEGQWTGNSYIGKKNGHLFLDTNEAKEEVTVKPIEEQGEWETRKLWEKVAKGIRGQNYDEAGREKSRIENEQRQRRKDEVAAGITWQHVHFTHVDSDEEYRSLAELLHDKLTPVHEDAYVFKENI

>XP_005838399.1_hypothetical_protein_GUITHDRAFT_102687_[Guillardia_theta_CCMP2712]
MPQVDFGLELLEAAGQGRQVIEEKVREVLNQYPHLLMYSDPYGHTAAHIAAFYGHLDILSYLSSLNNECLFSESFDLFTPAHSAAANGQREILEFLSKKSLSHLFAKDCDGWTVAHIAAFYGHENVLRFMAEVAPSVFGINAELLRMIARTASCKNEIEKVQKLDFQYYKPHQVLEQLECLASIKSDPDQESLGEGIVISTSSSILSSESVDSHHLLKGRKIPFGGAANRDEDESSTSSMDARKCHKQSLTNGKKNHSPPHERKLTRSPSWVQDVTTREQQSSWKTLLGGLRKGSDITSMLIPAEFLRPESTLERIQDVMQHGRHLESIVLPNSSALDRIKSVVRFHVAQAGKVLLLTHGTGQVSGVIRAIFDGKKPYNPILGETCVWAYKHGDSSCVTKVVSHHPPISAFFLNNERLGINITASAEINPTFTGNCVLVPFKGKRVLKIMHLNEEYTMTVPSLQYRGLFVGSRGAEWVGKVVVKCEQTGLSAKLNFKPLGWLGMWGSWHRVEGKVKSKVKGVKKLIGSIYGHWDTQLIYRDEESKEEEVMYDFDQSAKFFGVEQVKMKKASLPTDSLVVWSRLSAALTRRDMKDANRIKNEIEEEQRRIRKERAKRNQAYQPRFFRFKEGRWVPRDEMYQFQATCMVGTDV

>XP_005818672.1_hypothetical_protein_GUITHDRAFT_122119_[Guillardia_theta_CCMP2712]
MDDIVFDRPGALTECTEMEEDGSNRSIDEVARSSDPNRFVVEETPDQKSDAKASWQMDTTTKEQERSWRDLLKGLARGCDVTRISLGAHFLRPKSTLECLAATLQHGKLMSELNKGQSEIDRMIAVTKFHVSGLIKEVFDGKKPYNPILGETSAWAFDNGSTTSGISHMICEQARACDNLYSTTDLHLQKVSHHPPISAFYIRNKSLAVSMEGYMHTGAQFNGNSIAIPFGQRTLRLEQFGEDYMMTMPTMQFRGLFFGARGVEWTGPVIVWCKKTGLVCEMEFKPLGFLGMWGEWHAGKLRRDTNESEEVLYDVSGHWDTKLILRDKSTGAEQVLYDYDECHAKEAPQRLQLSNQLPTDSTVCMPLMVWGKVTEALLAGDLNVANREKLKVEDEQRALRVKEAEQKVQWTPKWFKKKKNGEWTTKLDEAEKYIEENMRASSSIDA

>XP_005536768.1_similar_to_oxysterol_binding_protein_[Cyanidioschyzon_merolae_strain_10D]
MDSTVRVPVDDVRTRGHSRSLERFLTASDWREVLAALEADGNLLDSSDSGEELTAETLETEDLSQTLTEFLDAADEPLSDSDLANLSGAGAFIASPFPRPGSCSPDADADASVSDADRLPLVTQTPETPAEVSESWSATERALYERGFRRDERITTSLSATVEQTPISIVQIAKQVLRNLKAGELLPSISLPAWLLEPLSATEKVALAMRYGELLAAWATEPDPFERFLKGMQYFLSGLPNQCSLRKPFNPVLGETFMCAFPHREASHGITSLFCEQVSHHPPRTAMHMRNSRLGVRIHTVMEPRPSFGGNSLKIEMAGHALMELTHAQDVEQYILTRPAMVFSGILGVGKQQLECIGKCIFHCPKLGFLAKFDFSGVSLAGLRGSEHAVEGKLYVHEQKRYRFYGRWDDCIYLKDLTNGETRLLYNAGDVYERCRIQVWIPPEPQQPPKFARTVWRATADALLRNDFERATVEKRRVEACERELRSLREQTGETWQPQFFELDPLTGIYIFNDKHRHFVEMDPEDLDAI

>XP_005715712.1_unnamed_protein_product_[Chondrus_crispus]
MAATAAATARRAAAPPPAVASESDDDEFVDARESLTSPSTSLAGLPAQIPHNYSRIEPLPSPIPPLDNELSIFRLAREVISSVKPGADVTNINLPAYILDPVSALEKTKKSMQRGELLQDISAAQDAHTRFLNVLRFNFSGLAKERFGKKPYNPVLGEVYRCCFPHRGAAGETLLVSEQVSHHPPITALHLRNDTLGFRMNSFTAPEPRFWGNTLEVKLRGEIRIVLTKFDNEEYIITRPYVYMSGLFAGKQRLEFNGSSSFSCPKSGLGAEIHYKTRGPLALRGDINGVTGRIFKLANNETLHTMDGHWDKKIMLMDVRTNTQKTLFDYEAIIAEKSMVAVLPPPHEEENSFSTRVWAKCSEAIKTGDTAAANAEKRRIEDHQRKLRKERKEAAVPWQWHYFVKREDVQEGYDLRPDLAPNGLLKLSLTAQEIAGLRSGNIVRDMQIEMLAENDNPEPRKLGGGRLKVFGRGRGKV

>XP_005709265.1_oxysterolbinding_proteinlike_protein_[Galdieria_sulphuraria]
MIRGNNAQHENSDGGKSPTKRSHSGKFLKQVNEVANAAIAPIKSAFEFLTNTAVSGLICDDQLAREWQQRNQQSSASQVRHSDDGLQRRKSVPLNSSSNKVITQTLGRKSTGAIHKDRQLDSLLSPHATSPKTTLLSTSNLEETDEEDDNISYYTCADTPGIDSKTEARTSFATDLDIFEEISEVPIEPSVQLSSEQDTKTNAQRETTSEGEYKKSSKKSTSTESIGTEKRRFHRYASFSAAHDDFRRGSGDHEALAEAASEPGFEMASASTLRKQALRNNEPNYSELSHVASEEHLSSVSVANQSADTSSSLPMLSGHSQERRLASYPNDAEPVTPDGYRVKDEFLDEVGPPQNMSFFRIVREVFKDVRKGGDLTSISVPASLLEPVSACEKVTRIMQRGELLQEIIHCQEPLERFLQVVRFILSGLPKEKFSKKPYNPILGETFQCAFEHRNGGGRTFLISEQVSHHPPITAVHLRNDTLGIRMTSYTEPEAKFWGNSIEIKLKGKIRFYLVNFDEEYVSNRTSLILSGILGIGKFRAEWRGPLHIYCEKTGYEAKLEFKGTALMGFLGEANAVDGKIVRRQKEGTSSEVSEQKLFSVEGSWDHQIRIKDVIKKENRILFDYDDISKHYRMKLLLPPPEALEETNSLYVWEGCTRAILEGNSRLAAEEKHKVEEEQRRLRRERMQRRIEWEPKYFRLSSEGEGYVFREETAENLFHDARNMCAAPPSPR

>Contig14224.0.g55|Oxysterolbinding_protein
MTSQTSKHNNSAQIKEQNSSEFQQQSFEQSNRSTDTFHYVRGMLIFSESNVRNMFILDQTNGVLYLFKQSNQSRPFKKLFLPGGQMLEQQRLISDQITGDLIPSFDYKLCRVRSQKSQIITVFSENNLDIERLKENFTSCSLLSPVLDIEQPGSNKLSRGLLSVAKAPIKATQLLIISLERLGDGARVTPFYLSGQNYKDSQQKLLDRVDVSHLIDGLAKGAQSMIKEIVGAVAGIVMEPIKGAKLKGIKGGAKGLGKGMLGLICKPVAGSIDLVTYTSRGIGRTPKTIQQRIKTIIRKRRMHKKLLNLSKQQQLRQSMGSVAEIKPYIPSNEEVSTQEILKKQRADKQLKSRRQQQQNKNLENFIIGQSNKYEYSINSKHLIKLLQQDFAQNHDMNADLFDDISNTDKIIDLVKIELSKFLQRNTEEITASTLINKLVKIIKTSLNQYSPNQLDKGIVSLLQIDEDDEYSSESQSDQKEYKIDKNLVQGYECLIQDMVRLLNEDNLQLSKKRIHGLQEEEFDQIHEIEKSESGDGNESDLKTYLLQEKLKNQNYDIYMIEAQPVVDDSDEEEEKQSQSNIDKQQRLPQSQRSSFSQLSNKHPYELDNSLEDDDFYSARESLDKSKASSIFDFLTYHQLKKDNHKENLIQYLLMRCLIKNFPALHKIQDLQKLTINELIQMEEDLCEIVYQQIEQQAQVRVQMQQIASSMIKSQNQSFSNKMKNSDEIIQGKQIHSKVNFGQDVDDQKLKRQKKIIDIAKTLKKINRSDEYRSSDAHKNGGFALNDQKVIQKYRNAGKELIKQIGKQLITGNFNLTNTSFPIKCMSHKSILEVIATVSCVGPAYLNAAAFATDPVERLKYVMTASIAWMYPTHHWDKPLNPVLGETYQAELPDGSQVYLEQSCHKPPISHVLLEGPEEIYQFSGYSGFSAKAYLNSIALNVFGSKVVKFKDGTVIKYNNPCDAFNNTFFGILNHQICGKVEFIDEKNGLRAFYDIGNVKKKTQDYFVGEIYQNERKVSDIKGNYMGFMDFDGIRYWDLRDQIIYESQGKPLVLCLPTDSRIRIDSQALLGGDVEQAQRNKESLEHLQRSDRTNRENAEKRRAKGGPKYIYKQ

>Contig921.0.g44|Oxysterolbinding_protein
MERTGQNIASSLQLNEKYLRGYILPQKTSQKAYFVLDIENEILHIFKNLDQGSNGPIESVQLSVGSIQEKMRVVVDIETGKILDSFDYQIKERSNLRFTVLAEQQNFQNIRKSFEELGQTKNVQQQMKQSDMQEVLQLFSQKWKEINYLVLSLEKIGEDYEANLGNVLNNQQKDSQVQQPSPQSSSQDSIISNLFSAVAGIVAEPILGAKEGGVRGGVAGLGRGLLGLIWSPILGTFQLVTQSTKAVSDTPQTMYVGFNKILKRISKDESSNNPNEPLSQSFNPENHILIGEDNGHQILLNRKRLREAITNSRVLSDLLFECDRCLSEEEKFKMKSVIMRQRELLKRKDSNLQDKVIKKDQIKTITEELLTKLNEDSQVQKPISQQNDDQDGGRDSETSSMADEREIHDKLQLILQIIREREQNLKTNDQSNQPVSVEELAEQSILMEQRFIQDIFEEAQNDDIQLYMIQASQLQGLETQDEKYEFENFFADIKRMNRKSIFEEEQKVTCALTQSREIAEQKLKERQDEFFNKAKSFRGFTQYRPGKDDYRHPTEASPNGGIQLTDSELIHRLRSSGKEMLKTIGRKLLSGSFNLTTVSFPIKCMCAKSTLESIGELAGVNPIFINAAALSKDPIERVMMAMTSAISYFYPTHMFEKPLNPILGETFQALGQDGTQIFVEQTEHRPPVTHFLFEGPQNLYRMYGWSSFVAKAWINSISLKVEGRKCLEFQDGTKIEWNVPGDQFNNIFMGTIVHQVTSKIEFHYKAHNIYGFIDIGNVKKKPQDQFVGEIHWNGKKLIEITGNYMGYIDIGGVRYMDLRELENFYFPIERFEPSQLLPSDSLRRSDSVSLKLGDVKKAQKNKEEMEIEQRHDRKLRETVESRRKKKNGKKFANVY

>Contig9764.0.g11|Oxysterolbinding_protein
MESTASQQANLDNNLNAQYKRGILIPAKTIQKAYFVLDTQTGVIHVFKTLDQDKPSESFSLSRGTFPDKLRIVSDPESGKVLDSFEFRTANNLQFTVLAEDPISVQGLREEFQLSSQKAHIKNSMAKQFGKGVFGAIKVPWKIGKVMVLSLEKIGDGLEATQDYVFKQKPKQKVEAPSNVASGLAYGTKSMLTNMFSAVAGVIVEPVKGAKQGGIRGGAVGIGKGILGFVCKPVKGTIDLVTQTTRGIGNTPRTMYVGFNRMVKKVPAKKHSQNPNEPLEESKQNDDNIDPVNDILIGEENSEHIYINKKALKESIRSSQVLSALLYESEKHLSVEEQAKMKQVIMRQRELLRRREQVMKTEVVAKDQIKTITEELLKQLNESYNMQNRVPAEDDQLSQISGNGSETSSVADEREIQQKLQQILSILNAQKSLEQVHQEDIEEQKQNLSQFNETFAQDIFDEASTEDLQLFVIQAKELDQDIDVNDNEYEKFFEDARRTITNDEEEKQSLMPVTRAKTIQETMFDQDKQTIIIEKARNFRGYKQYKDDYRAPDAGYYGGFDLKDPELSSRLRSAGKEILKSVGKKILSGKFNLTTISFPIKCMCPETILEVMATIAGVNPIFITAAALSNDPIERLILVIAASIALIYPTHQFEKPLNPILGETYQALGQDGTMIYMEQTCHRPPITNFLFEGPQNLYKMHGWNSFSAKAWLNSCTLYVDGHKTIEFPDGTVITWNNQGDQLNNLFMGTLGHQLTGKIEFHDKKNNLYGWYELGNIKKKTQDYYTGEIHQFGKKILEIKGNYMGYMDVGSHRYFDVREFRDYYYPIVSMGENSLQSDATKRLDSVTLRTKNDNEAQKMKEKLEEDQRHDRKLRETAEARREKGGRKYAHIF

>Contig12466.0.g59|Oxysterolbinding_protein
MMSSTQTQENDQNGQHQETTVELRDLAEVQEQKPRHRFAHPKGGMNLYDEGNIIPAAFKDYMGKIANKIIKAQLTDLLKISSPSFIHSPITYVQGAANDVLLCQRFLTPAAATDNPFERLKLIICMYVGGSHINPSFAQCRAPLNPILGETVQRVLPDGTKFYGEQTSHHPPITNFMLEGPNNLYRFSGYFEYKAWLSGLSSIGGSRIGKQIISFKDGGLISIKDPQIEISGLTIGDRVHNIQGSMIITDHINKLEATVTYNPPKQEGGGVLKGLKNKLFKSKDRELSDHLSIQICQKAQNSSKKVKEKVVVFEGSGSWLEYIEFDGKVYWTVNDEIPNWLLPDCDSVPCNLKEVLLPSDSGNRADIKNMLEKNFDIAERHKNEYEELQRKDKQLRTQALKLRNKK

>Contig22728.0.g23|Oxysterolbinding_protein
MQGSDTQSPLTDEAQAQMNKLNINRGEEQKQNNGAVSQDPSQQYQRHKLAHANGGLILLDEGNIIPQAFKEILSKLGKKMMKGEFQDMMKTPAPAYMHYPRTYLEGSAVDLSLAPKYFKQASESIGALERLKWVVATYIGGHHINVSQMQCRAPLNPILGETIQRVLPTGEKYYAEQTSHHPPITNFLLEGPDNAYKFYGHFEYKAWPSGLSSISGSRVGKQIIEFHDGGRISITDPTIQISGLTYGDRIHNYIGNAIYRDEVNKIEAEIIYNPTESTGYLSSLKSKWWSSKKQPLTDIIEVRISQVSDSGQKVLLETGTGSWLSHLEFNGETYWQLSDVYNEWLLPQPIDGSEEAVKVLPSDSQNRGDMKNLIDRNFDQAEKNKIDMEELQRHDKKLRVAVKKRRAQVAKAAAKQ

>Cvel_14514
MESGKEFPSFVSPAVTPALDRPCDGYLWKLGDGFFNNYWSERYVVVFAGFLFYFDSIHDENAKVTINLQQAEIEWIGAHRGRGNVFLLKSPHHSREVHLAAETEDSSRQWIDLMQRASAAAAEPEASPSPQMSQSALSSPHRPLSTLGPPSLSLDWLSQKASLRDTQPLRRWSTQKTSGSSLSLASSALSVVEAAPASTAVTPPNQADDPVAPAVARAARDVVSRAQRLMETKTRGWMERRNSFRGTGPGLTDPWPPPCISREIGEEAGVLHCVASGYLVNPSLVGKPLGGKPPEEGLSLVGRMMSCLGGLVISLVSFLLPCVAGVVLFFLVDAWMEEHPDRDWAALWQKYKRVATQSGDWAGPQGGRWPRWRSICGIRLHTAWGALIEHFVSWRFSFSDLGTLLGLGLLVLLVAVGLWGLLQILCPCRRRGRRGESALPRERGDLMSSGASGAEVLFAATDVQVSVAHLASVVASLQRRKELLLGLLSVDKASLARDSRDESEERSGVTRERKRSLSGEDGEAKTGVGVSKRVWSRDFAVVDVVERHERRPHGGGTSFASPHRFTRAYRRLTIRDRESVDGGGCFFIVSLPMEMDTGGMRGAPGRGSGHGGSLGSSPRRRRNRGVHGGPGGSVFSLEGVCPLPLTKIATPSDDNPVEVFVCQSSRSDRTASELCYMATGTFRGRGGLGGSGLFVGGAGSGEMGGVGASLPASLAASFVAIRAFAENSEGSPYYVSSLEREHRPPHSVLRPSLSRKDSPRKLLVAQPSNSPALGSQLWILPGTDRGSAPPSESLTAPSPAAHAAACAAAPSVEVNEGGESSRSDPSGRGGRASVLRIEKRRGSTGRSPSMLGVDHHLTSQGPSRERSRGLLSSSQALAEGGDLEWPLHGFERVSHYGGLKLIDQDLLDKQKGVASDMLRQAASLIAQARPLTQISLPVRVFEGRSLLQRVADLWGFGPAFLPLAARYTDTDPLERAKLCLCFLLAGLHKGTQQLKPFNPLLGETFQGTWSDGTKVCLEHTRHHPPVCHFQVDSPRGGYQMDGHYKLLMKLGTNAGLGFQEGPTKIRFRDGATVTLTWPAMRLSGILYGSRIFEWVGEATVTDEKNGIFGSVRFGETTADGKGGGSVFSPPALPSEEIRGKVEDSKNGTSSQLTGSWLDLVEFDGQKYWGIYDSGFEEAVPVSAAESLPSDCRWRPDIFFLRNGDLDLSQKWKHWVEDRQREDRSLRATNAKLEGSG

>CEM22671.1_unnamed_protein_product_[Vitrella_brassicaformis_CCMP3155]
MKAGLLARLLALLGVAFMASAHGGNGAVSATSAPHRALGDAGVSEGFWRFVTDEIDGIALVLGILAFLGLLNALADVTQSKYPLAHSDWVYLFFVIRRDSTWGPPVSDRPTTAAPENPAANTNTNPAAAADAGRERVRSSLDSQASVMSDEAADDDGPSPSPPRPLAAGVRDCIRQFFLWVYTSLVLWWHPPEDDSPISIEVEIQRGEVAYTTNVTLVGLMKEQLADWARRWCLTVAIFLDLERGKWRTWATRPQPPPLCLSDSGPSLPHRQRDSSIGSPFLSAAESARSVDMWGEGRPAGGARRFCQVFGWVASRKMSAVRLCSGLRTASAQLHPADDSLICTVAMVLTLTIWALAIAIGPACCRQRPAWRGLAEGTASWPYVVAAVALVAGWGMERLLMAAFFRPYLPQPRPGRDAQEIVRLWIRLATLTKRRFTCPLVSVCVLVVAFFLLKSSSQAVSNWVLLSGSTLVYQLFLWPFTQSLVIASLQTCCAPATAHTHTHRHTPVDLTSSSEQYYTAVESTPSSPSHRAGGGEGEPGAASDRRRPCVDGSWVLGGWPEWAVWDGDLLVQREGVRSVEGVREYLIWRVAAEKAHIVSWWRSLSASAAAEEAQAPTTTATAPAGGTELAPLPSSPPPIPEQAADIEMRIPLLPPAPASASTQADSPPPFMHRQTDEGRKLQQPAPENKARRPSPDPARQRQHLDVPAHPFTLPQTRSSDTDALVPTGDNDAAVELRSLPVSRRSSARKASHDSPRFFDAVSDISDADNADVCGGNDPERPESEPDRPMRTERTEMESGALAMAGQRGLGDKARNQAHLETDRSDNPPPGNPPVPRLPPCHSPVPPMRGDSFPPEHGDVSVKAADKKGAGAGEAAAVLDEVRKVLAALVRKHRMSEKEAALLWETWPLKGLVRLAEGGVKCTDSEQLEKQKGVVLDLIKSAGSGLLQGKGLGIISLPVRIFECKSAFHRLAEMWSFLPIFLTKAASLPQDPAHDLERFKLTVTGIIAGLYCGISQLKPFNPMLGETLQGCWPDGSELWFEQTSFHPPASNYQILTPHGGWWMAGFAEFHANMKGNAVIGKQEGKNVVCFPHTHSRQRVEFNVPYVRLSGLYFGARLVHYIESGRFFDPINGYHLELHFGKESHRRGLFTRRASGHALDHFKGYITKRKVAVDHPPTPLHTHSHTPTPHADPHPHLHGHAPHRSLAHRRSSTHEMLREGEDIVCEVFGSWLEGFWCDNKPYWLIQDYRPVELCVPEPSQVLPSDSTNRPDLAYLKAGDTETSQEWKLKSEARQRKDRHKRDACRRALQLPELQFK

>XP_005831236.1_hypothetical_protein_GUITHDRAFT_153002_[Guillardia_theta_CCMP2712]
MLQFRSASDADDICKAVEAVSDDMAAAALQDLPQEDFYGDEGNSDDEEDSGTPTGKGEKKKRSWLGKVGKGLYRRSVNLAKSSGLVDTPASKEDQDLLAAVLSCRSPFAVKAGGVGIQNPEHAKACRSVLSLMISQMGRNLLSGGNVMNVSFPIQCCQPRTVLEIGAQMGQFTHIYLPRAAATKDPVERMKNVVACFVAAMPLTSGNFLKPLNPILGETLQVDYGDGSKLYMEQTCHHPPVSSFCLVPPSQSYTVSGYQTFNVGWGYNKMFLTNQGVRTVTFSDGSSISLDFPQDRWINVFWGDMVHQTIGTQTFTDEKNGIRCRLEFGNPSNRKGIPNDFFEGVIEQFDSKNPDAPGTALHQVQGSWLGFVDFDKTRYWDIRTTEKTPMSVPADMLKSDSRHRTDRKFLEAKDFKKAQAEKIRLEENQRHERRLREAVHGKH

>XP_005711769.1_unnamed_protein_product_[Chondrus_crispus]
MASSDDDYRIEEASPTGGKVFNDPKEGEMLRRSLQYLAQRVGGAVLSGNVNFTRMSMPVHLNEPRSLLERITDDWAYAPHFLMAAARSKDPVERLKLVAAFVVSGLHCMKTLGKPFNPILGSTYQTTLDDGTPCYVEQTSHHPPVTHYYIKPESGEYLLAGFSGIDGRVAWGLDTGLSTRRIGINVVQFADGTRIVYNLPRMLVRGLGAERKAEFLGPFNVLYEAHNLVFDFLLDPPQPFCWSPFGATTPSDYMDGVLYRLSQNASPENDSIVFTGAFQDRKGAFFGNPDEARKIANEENYTAVELRTDEQVSLSVTSATQERSSSKPSAEQNEATDREIICFARGSFLGYFDVDGTRLWDIRHTPKSELTPSNMENAIGSDCRYREDVDMLRKALDEVNDEATRERLTVEAQALKEKLETIQRADRKWRKEGLINETEKKTLSDGGKIGSVQDECSFDVSGGQMLRDGIGGTVEETPFFPTSLQA

>XP_005703477.1_ubiquinone/menaquinone_biosynthesis_methyltransferase_[Galdieria_sulphuraria]
MFDHMAHYYDEMNRLISLGLDMSWRRSAVRHLTLLPPHSKILDVAMGTGDLSLALLQQRPDYHIVGIDPSVEMLRRAEKKLSRYASSVTFQQGVAEELPFSDDTFAAVMVAFGVRNFEDRKKGIAEMSRVMSRDAKLVILELGYPDSDPHGWRRWLNRIAESFIRYGVPYLGMILTGSRDEYHYLQQSMYSFPNATTFQHFLQTECVILDWIPLILHDDSLCCEMDKPTFREHEYIENHSRHTSFESPKQRHGNFISKVLDLRKSQQRDREKEQDDNLSDNRHSEYKRHPNAHSSVGGITCHDENIIKAQRSVVFELIKQVGKNVIMGRDLLYVTFPIQCCAPESALQRFAYAASYAPSFLGKAARQTHDPLERFKWVLAFYIAGMHCTCVFMKPLNPILGETYQAQLDSETMIYVEQSSHHPPVTQVLVTGPGYRFYSWVTYSAHFRYNHIKLVHTGFRAVYFDDGTKIIWDNPYDIFNGVFWGSYHQETLGQLHFQDDKNGLYLELQLGNVTNHPSDYFQGTIFSFESTHQKKKKKDSLPVAKVKGSWLGFLEVDGECYWSLAHDEKAYPTSVDKRYLLASDSTFREDLLYLEKGDLETSQQKKIELEEQQRNERKWRTKKTRTFSFLHPFQKNG

>Contig18515.0.g31|Oxysterolbinding_protein
METTSDTTDQTQEQLEQLKLSDSTNFTGEAIQMQGQLEVDEKDIDGNQYVFSKSISVQKNSFVDSRQNIDKLCPPPVYFSDELLLKELPVEKEEILKGLQETPQGGLVCVDKEAMEKQKGVLVDVLKQLTVNILKGLTITHISLPVKIFEPRSTLQRIVDLFSFSPIFLTRASQTPDHLERFKLVIANAVSSIYLCCAQNKPFNPILGETLQAQFSDGTEVYCEHTSHHPPISNFYVHPKDRKGYEFWGFYEFVGSMSGNSLRAGQKGPNNIKFEDGQHIRYSLVDSKLGGTIMGDRTVEGVGNMVFEDLTNNFKCVLFFNTYQKSGFWTVTETGKKDEFFGVIYKTKQPIDPVASFKSYYIKGAKDIPDISKIEPEIEEKLATVTGSWLRELKIDDQVYWNIDQDKPLRQIPMLDKSQFVLPSDWRYRDDLIWLKYENIPIAHNWKVRMEVQQRYDRKLRQLNQKGKGSH

>Contig7282.0.g43|Oxysterolbinding_protein
MEQIERDSQNQRILKDDDVDQDQDGGLISTDAYAEQPDQPITQTDPIDIGSPEEPDDQELTDNPYILTKGTAVGPNSFVDFRQQYAKKAPPPKYFTEEQLLAQLPTSKVDILRGMEEQKHGGLVCTDQEAMDRQRGVLMNVVKQLTVNLFKGLTITHISLPIKIFEARSSIQRIVDMWSFAPKYLKMAADTSDQLERFKLVIAFAMSGLYICTSQYKPFNPILGETLQGEFTDGTKIYCEHTCHHPPITNFYMHPEDKAYEFFGHYEFTANMGANNLKSGLRGPNNLKFADGQHIRFRTPDFKLGGTVMGDRTIEASGNIYFEDLTNNFKAVIILSTYKKSGFFKKSESGKRDEYVGVIYQCDPIRDPDESAKQLYGKHAIEISEMKQIKDMSRQICDIQGSWLRSLRIDGKKYWDIDEEVPERFKPCMQNIAPSDWRYREDLIWLKYNYMKIAAQWKVRMEEQQRHDRRLRLKQKEGKK

>Contig22089.0.g106|Oxysterolbinding_protein
MSCALGQTNVKDNVAEWSKAPASGAGPKGRGFKSHHYHFFFKNKYYDNKRLSDCCFLNKGDIDGDVDWEDFVLIQDQITTSFNERKLRSNFYLTRTKRQASNDVAKQKLQNDYSIQSLKLVKQLNSVTPAASNDAKQNRQFFPITYQPTLQLITPSNQTSSVFPNDLSQYHSNQKACEDIDDETTNYQSNPIPQSSGDQQGRHPRLNWAWRSSNPKSTFGNKRDSNSNNDSNPFSKSVNNKRADNNRILIIDETIKVKNNSNNLSNNSQVSQQKKSGQKVQNLDIQNDNNRSSIGNKLAAPTAQDVSLILNECPLDLYTTPEIDGLDPKILSENKLIAPFSFMNEKVFLDNRIGNAPTPTYLTYETLKPVFSGKKEDIMEGLLIQPKNGLKCVNERILEKQKGVVKSVISQAASNVFSGQSIIGISLPVRIFEPRSLLERICDWYGFAPIFLKKAAQEQDHLERFKLSISYALSSLYCSLKQQKPFNPLLGETYQASFTDNTRVYCEHTSHHPPISNYLIEDSSELYQVSGYYEFKAKISGNNLIMRNEGPNNIRFSDGQTITYEYPVTKLGGMLWGDRVLNIEGHMVFEDKQNELKAVVIFHHHRYDKFIGQIYHKDVNVKPSKKDPSKLSDLKDVAKVICEINGSIFENLTIGGQEYWNIDTMEPMKALPIPNALPSDPRYREDLIWLKRDNENYSQIWKTRLEIQQRYERKLRQDANQQKESKSKNKKK

>Contig22745.0.g71|Oxysterolbinding_protein
MEKIDKKQSLNPVIGGDHDDSVDWEDFIIISEEITTSFNERKLKTQFYLSRRGGGALEKIEFDQDVNIDYEKACLIASQAGDPYANKTKNSLDLSDRPNRNLSKSNNNLQGILDQQQPQKKLLWSWKDQKQKQNSMRGKSMLLSSNQKEAAEEEAKDYERFQAEQRFEREQMMQQQQYSQQPNGPANLSDSKIDSLNITHQNNNNIYMEEEIQNQKISPLEEVPEDKFITPEDDGEDEQIWSKSKLMTPYSFMNLKVLQQNLQPEAPPPTYESYEQIKLSTEKSQASNNNTNQTQNVEKQKGIVKDVLSKAAANVFSGQSIIGISLPVRIFEPRSLLERICDWYGFAPVFLKQAGLIEDKIERFKLTMAFALSCLYCSLKQQKPFNPLLGETFQAYFEDGTRIFCEHTSHHPPIANFLMQDPEQLYEFWGFYEFKAKIANNNLIMRNEGPNNIKFQDGQTITYCYPTNKLGGMLWGERTLNIDGNMIFEDKENGLKAVIIFKHQKNDGYIGKFYHYKPELNLQKKEPTKLSEIKDIQKEICEIQGSWLESLTIDHKEYWNMKTMEPMKPIPLPNPLQSDPRFREDLLWLKRKNEGYAQTWKTRLEIQQRYERKLRQDIQKLKEKQEKANDRSSVKKKSFFS

>XP_005827974.1_hypothetical_protein_GUITHDRAFT_96169_[Guillardia_theta_CCMP2712]
MATTVMPQRNQVKDDEIVLDGVFNGEENEDEVEEALRGMCVEANPEEEENSNDYVDISDDIGIEDKHHEKLSAERSGFRKMAGKSLRGLWNSAKKLAGRSKDRMKDSDVERLLEKVMKCRHKLAHPNGGLINTDYEGIKVSRSVVAEVVKQMGRKLLSGQNLLSVTFPVRCCQPRTILECAAYQFCFCPHYLSRAAMETDPVERLKHVTACFIACIHTTSQFVKPFNPTLGETLQASFDGGVRLYLEQTSHHPPVTSWQVVGPNNSFQYIGWSTYEASFGYNKLYVKQSGIRMCQFPDGTTIEVGFTMDRYNNVYWGDVIQEVLGGYTFLDTKNSISCTIELNPCKGLPSDTFIGSINRLDAQGEIINSICNVEGSFLGFLDFNGHRYWDISSNTGRDPVFDPLEKCLPSDSRFREDRNALVNGEVERAQVEKVRIEERQRRERRLRAAAAKGGPWIPADVK

>XP_001699233.1_predicted_protein_[Chlamydomonas_reinhardtii]
MVFKLGSKKKKPSDAPATSSNGSSVAAAAVEEEIAYHADADENGGMLCTNDELLKQQREAIMQWVKSMGKRLLTGNVNLINTPFPVNIFEPRSYLEKLADVWVHPRYLTAAAQATDPVERMKLVTTWFIAGLHHAFTNWRKPFNPILGETWQAALSDGTSMFMEQISHHPPVSAFHMEGPGGSYRFRGLSQPTVSIQVKYYGFKTVAKGFRYVEFRDGTRIELHYPQYYIKNVVYGSSRPRAEVDGQAILVDVRNKLKTVISFGALKGARSKVLRRVDAVHGFIYDCRHNQSGDGAGLGPSSSSGLPKLDGSAHGGGKAQSGGSFFSMSALNSMGKLLRISQTPSPSNIDPTPSDKEGVAVAAIEGSWLSHINIDGARYWSITKEVPDAWRPVPDPLPSDSRYRQDLVVLAAGDMKGAQAAKEALENRQRNDKKLREVALASNSRGGYRH

>XP_004363796.1_hypothetical_protein_CAOG_02957_[Capsaspora_owczarzaki_ATCC_30864]
MANYRSQSGWFDIQFVQESVNLSHERQPKQGGLKFTDLEYLQLQRNGAWEVLSQWGNSILEGKEIVNLEFPIEFFEPRTVLERLVLGFCYAPAFLSTIARPVPPSGAQSADELALQRFKSVIAFAFSGLHLSPTQRMPFNPVLGETFQATLEDNTAVFVEQVSHHPPISRWEVSGPAGDYIFRGQVGWSVSGFGNSMKSQQKGECSIEFTSTGQKVTFDLPYVSIGGLLVGDRTFDFGGTMHFHDHANQLSCDLTFHPDSRSGLWRRLFRSNKTLRDVARGVIVRGREEVCAVDGSWLSHLDIGAERFWELGQQKPSSVFPVADPLPTDSRFREDVQALAEGDLERAEELKTLTEEKQRYLRRVEQASGASPQATSNALYEKAAPLSDSKHGADAKAFSRSNLLLHDLAPGSPSKRKSHVSLNSADDESFYDASETYGDSQQSSRRQSLERSRLDSPSNRSTSKSAVPH

>XP_009522569.1_hypothetical_protein_PHYSODRAFT_558498_[Phytophthora_sojae]
MQALQDAQQRFNDLVNNDWPERVPVESMADYDPTYMKEGFLQKKGQRLKGWKRRWFVCDGRTLSYYISRKDRKPNAVIPLEGCTVQDGGLSETWNSPRIYLTDPATGIMYCLSAEEGIVVTQWLDVLRVAVARVNNGGGSSSSNSAAASSSSSQGASSNSNSRGRQQARTQTQRLPSSSDDEDSRVHLKRATSMGPAQARTVTLKSASSVVGGSSAALTASSNGDGKRATRMTSAPSAVNSSNSSAAQPTQQQHRSHRTKTQRLPTTISLENELSHGLDVLEALLCGHSATGSSSLIRNHVVFRPIGALNGVLRSIGTDSGSGKQYARASVVLPVSSEVAAILLADHGRRAEWDLQFPQSSHVATFDDATDLVHLSSGSFAQIQRTKPFVAPHMAAAACALCAALFSGASSWEALLTAMVYAAAIGGIVNSIDYSALTKPRDLVLLRHVRESAAPDSQDSGDDKSVDEMGQSVVLILEKSVVNELKPVATGAVRAHVGLSGWLLEPVDSGHATLATYITDLDMKGWLSPTTRQSFLLSRLDCVSVLSEYVNQAQLCGSELGFGGGLDEDGEGEYETRSIGYEDTSEGSGLGEVVDGESPAIFHPKTYMRGMMPLPSGGLKLIDKEVAKKQSGVVKDVIKSAGAKILEGKSAVSLSLPVRIFEPRTNLERVCDLMLYAPTFLNVAYAQNDALERFKYVMAFAVAGLHHSIGQLKPFNPILGETFQSTLNDGTDVSCEHTSHHPPISNFQFTGDKYSIAGFVLWHASMSVKSNAMLNTNKGPVRVTFPDTEGLAGTTIEYNLPYLQIGGLLWGDRTVDIMGNMMFDDKKNHLQCELRLNPDAKSGMGGMFSSSKTPTDSLRGVILDTSVSPPREICDVSGSWLHDLVFGSKTYWSINKHQSGYMVPYPEDKILASDSRFREDLHYLAAGDLDESQEWKVKLEVLQRADRKARLEGRRPNHWSFRAAAGH

>XP_001694463.1_predicted_protein_[Chlamydomonas_reinhardtii]
MAKVCDSQREAADEAAEVLSNLHVDDVHSLNDKDPEPDAHGQGGYRFDTPEHQQQLREQRTQLWNWLKGVGAHMFKEGINLTKISLPVCLFEPRSFLERLTTNWEYNSLLVAAAACADPADRLRYVVAFAVSGLCRQVSFHKPFNPILGETYQAVYPNGIEVYCEQISHHPPISSWQVYEPEGKFVFFGNGNWVAGIKGNSVKGRQTGTNCVTFASDGASVEYELPGLQVKGVLWGTRVLKYSGQMVFKDVKNGLTATIDVDPQPQAGFLTGWFRAKKAVVGKLCRGDTVIDTCHGNWLHYFEWDKGANGGRAKRLWDIRTASVTPAVAVADPLPSDCRNREDVVFLKAKDQPKSQEWKLTLEERQRRDRKLRKEGGGVNEH

>Contig16594.0.g42|Oxysterolbinding_protein
METSVQLINENQHKISSKLDSLIENQPQRRSKMAHPKKANSDEIEEDYPQQFTQVKRDQASGISVRTESNIQNTQELLLDQDPEDDETSEDSEYDYDLEMSQVSLKRGQYNTFFEDNDFKRDPKHGLIFTNEELMKKQRGVLSHFLKSMGFNLLHGKSILSISLPIKIFDAKSFLEKIGMFMKMAPHFFEKAAEIPQNNFTQALQRFKLVVAFAVSIRQFTAQMRKPFNPILGETFQARVGQYKVGLEQICHHPPITYYSLWSKHHDKFKAYGSLEYRPVIGANSAGGHGYGPFIVEFEGGHKIEIWSPKTEVNGLLYGERAFNLYDTMTIKDKRNNLYCEIVFNPDKKSGLKGLFGMGSKSAPSNLNDDNRVDYIEGVISHNTEIDYKKNRSKLSQGRDYICMVNGHWTEDLSIDGVKYWNINEFKGLNIRPVQDPLPSDCRFREDLLHLINSGEETGQKWKEILENRQRHDRKLREDCAKRRAKGGKKFANIY

>CEL98315.1_unnamed_protein_product_[Vitrella_brassicaformis_CCMP3155]
MKTVEYRLVMPLSLEQYQIAQLYMVAKSSLEDTAGGDGVEIVTNEPFKDGTWDGQFTHKRISIAGHLPKWVLSLANPKWLVFEEKAWNAFPMCKTEYSCPLFPRLTLVVESMHHPGVCTHDNPLDLPEKTLRVRQVDVIDIVNDPIPPDEYREDEDPALFSSQKAGFSPMSKEWMSRADPVMTCYKVIAVDFPLLGFQNKIEDLTQKLLRNALLKYHRKAICWMDEWHGMRLEDIRALEAQVKAKLDRAWAKERTSDEDSDNVEANPTTPEPQEDEDGEVEVVGIEGGLGMGSPSSRRRRSPKAAASPTGTDRGRLGRSPSLRLEEYRRSSSRLSLRRSSSRVGTPKPPLHPATALHTPSSHRALPGGAGAAPPLTATTRRPKCGYLFKLGEGPISYSWHRRYVTVRVGGAAMFYYGDARDSVPRGRVPLRGAEVTWAGEVSGRAHAFAVTVTSSAGWKRTLHFSASTVEATKQWMGWMQRAATAASSLPAYAPSAVTAPPTQVPSPSPFPSSPTSLRRPPNEQHKTQTHRAAPLSHAGASATATAGPPRQDRWASAANIISSSGSGSSGPLSLALPASWARPGLEGTPHMPDTAAAIPGPPPPAAAAAPPPPPAAAAAAVPSRLPVVPLASDEGMMNDLSPSSDMSAPASPPWFPLPSQPPPTHSRDRDPWWWRKSANASVGQLSDGIEEALHEVCKAAKRMDAKGTLVEADQGLRLSVADLHTWRVFGGARRHGRGMAGGPCVRLLGWLCLVVLILPFLSSLCAPDGFLAWVFESMVTSPSWHGALAVLLSVFCLTLFIRYRHPGPRQYSYAERWESSSPRAGAARLPPDARLVQATCMVFSPPLDVFSLLMDLQRTREWLPGHLQSERIETIDAHNDVIYETFRPVLSSAALPGGNHVGLGLRRLCRRRYWWSLADGSYFILLQTSDDAERRLLNATVAAQAARARSRRNTRHGQVAAPSMPPQPQRRTAWLDWLGRGNGGGQPSVAEWVGGWPARGNTAGLSGESTLVGASDDVPIAPLEAAKAIKAEGYELVSFGGWVPDWGEEACLLTRARAIGQLRYLTLVAPGIPPQHEHDHNAINGTIGKQQRVGEVWEEGTAAVCSRSGSAHAGATTTSTDGLCPSPLTAASASGNGSGSRSGEASSASGGTRGSARRSNLHPRNDSSPSRREWPLHGLVRLPEGGLRCIDASQMEKQKGVILDLIKSAGQALLEGKNIVSISLPVRVFEPRSGLERISDQWSFGPTFLRKAAMVPPGPNQALERLKYVISFCVAGLHRACSQLKPFNPILGETFQAAWCDGSHLFMEHTSHHPPISHFQADGPDGLFRFWGFYEFKGQLKGNAAVGRQEGPLVVEFHDGGRVEYTMPAAKLSGLIWGARTFEWVDRLRFEDRANGLTCTLVLAPDGRPLFGLPRTPVDTLRGSIKKDGKSVVSVTGSWLEGLHFDGKSYWSLYDFEPATLTPVGGTDVLPSDCRYREDLIYLAHGDEDQAQRWKLALEVRQRRDRSLRNERKHFP

>XP_004349610.1_Oxysterolbinding_protein_9,_putative_[Acanthamoeba_castellanii_str._Neff]
MEGQQGGGDGAVEDVARDIERFQLSGEGGYQPQRGSASDAPHAAPPTGVELQRRIFTHNKPHSSGGLQWVDEVELKKQRSVAVDVLKQLGQNILEGKDLTKIALPVYLFEPRSFLERLADGFSFAPHFLRKAAEAKDALERLKYVIAFSVAGLHLTATQKKPFNPILGMPGLPIPMDCYRVINDNDNNNNNTGETHQAFFEDGTAVYCEQSSHHPPASNFQVLPPDDAYRLYGFGIFSAHWKGNVIHGLQKGPNLVEFPADGTIISIELPHAIFKGLIWGDRIQDYGGSITFTDKKNDLACELTFEAPGWVASWFSTPKHPSDWLSDVLAKVEGSWLSHVDVDGKRYWDLKEVAPWSIRPADNPLPSDCRYREDLQALLRGDEEEAQRLKVKLEEKQRREARLRDEGEAAARAKRSRGDKGAK

>PPA1387152MTSKVMSSSGEIPFPLGKSIPLVSSSSEITHPGNGKQLQAKVFAQNQRHPSGGWKFVDEVELKKQRGVCWELVKSAGNSLIEGKELVNTSLPIALFEPRSFLEKLTDTWCYAPVYLSKAAAAVDPVERLKYVVAFTMSGLHLTSTLTKPFNPLLGETFEGHFYDGTKVFCEQTSHHPPISNWQVQDKDNRYHYYGYGVWSASCRGNIVKGYQKGTHTIEFHDGGTITWTLPEILVKGIFWGDRLTDFNGKILFTDEKNKICCEITFNPHALGFVRSIFSKQKEPSDYFVGQIFKTGTTESKSGKEKKQDADVICSFEGSWLTHLSFDNTVYWDIKMVPPGIVYEENPLPTDCRFREDLRYLKEGNTDKAKEYKSIVEERQRAEAKLRKEGKKEKSKKK

>XP_638575.1_oxysterol_binding_family_protein,_member_9_[Dictyostelium_discoideum_AX4]
MTEVQSITTSGEIKMPLSPSSSSSSISSSTTNNTNIKSIPILSQCYSFSGKGNGKELQDKIFRQNSRHSNGGWKFVDDIELKKQRGVCWSLVKSVGNSIIEGKELTSTCLPIELFEARSFLEKVTDTMAFGPLYLKAAAETNDPIERMKMVASFVVSGLHLTTTIAKPFNPLLGETFECDLADGSSAFCEQISHHPPISSWKLLEKDGKYKYTGHFIWSAGCRGNVVKGCLKGPHNIEFADGTNIAFTYPDVLIKGIFWGDRVTEFCGKMLFTDEKNDLACELIFNPNALGFVKSFFSKQKTPCDTIDGRIFRINNNKIKDGNCDKINPDDVLCKMEGTWLTSFLIDQVEYWNIRMIPHGVIYRDPETTLPTDSGRRDDIKHLKMGNLEEAKKYKALIEDNQRKQKKEKDEKLKKDEKLKKEDKKNQK

>XP_004335438.1_oxysterol_binding_protein_[Acanthamoeba_castellanii_str._Neff]
MSSFERMSKAAPSGGYICTLSEEDLASQRGVIWDLVKSFGKNLVAAKELTSISMPVRLFEPRSYLERLTDGWWSGPTFLNKAAHTSDPVERLKLVMTFAVSGFFNTVENQKGKPFNPVLGETYQASFEDGTRIYAEQASHHPPITCWQVYGPEDCYHFYGFGEWSASFRGNSVKGHQAGPNIINFADGGCITYSLPEAHVGGILFGERIIEYLGTIDFRDEQNGLSCDLVINPNEQKMFSSFFSSKKKVPTDYLRGEIVRFKNKEDIKKPKSKVPESDYEVVCKVQGSWLSCIEFDGERFWEWNDSKLKIYTPIPVDDPLPSDSRFREDCKYLAKGDLETAGDWKRKIEQKQRSEAALRKEGYEIRKKENAKGTNETKEKRILTVSTIKKRLDEIEEAAGKENGEAGKGKTAA

>XP_002678506.1_oxysterolbinding_protein_1a_[Naegleria_gruberi_strain_NEGM]
MTNKRNSKRLSQVDESANNGGALGETYFGSRIWLNNVGKDGRATNTASGGGYLFTNEEEIKEQRKGVWDMVKKLGGALLEGKDLVSVSLPVYIFEPRSFLQRLPDIWAFHSLLTDAADQKDPVQRFIRIIAFGIAGLHQTCVQKKPFNPILGETFEGSFSHSSDPSKDIHLFVEQTSHHPPITAYEAQGKDFRLHGYCGYQASIRGNALKGGQIGPTFIEFESDGAVIQYSQPLLWLKGICWGDRVLEYYDKMSFTDAKNQLTCDIQFNPDQKSFLGSFFSSQKTPVDYVKGEVKKDGQVIGVIEGSWLGNVYYLPNQTSDSLSSMKEKEKSELEKLELFNIAAQMPRYLRPSDNPLPSDARFREDAVALRNGDQELSQLKKEELENKQRKERQLRKTGSSKTSLSSANSQSGTDLVTAINNNQN

>Bigna1|87198|estExt_fgenesh1_pg.C_170187
MSAKEGGDNDPKKVNLKSIVKPWDKEEKSEFGVPNVERGQNGGCSFVAKDGLSMNRTVVTHLIKSMGQNIMEGKSIINISLPVKIFEPRSFLQRMTDHWAFAPLYINKAAMAKDPVERFKWIITFVISGLHNGCRQNKPFNPILGETFQATYPDGTKIFLEQISHHPPVSQYELFGPNGSWKMCGFNEYKASFRPNGVVGGQYGPNRIEFEDGTVIEYSMPKVCVTGMMIGDWLFYWTGEIVFKDLKNNLTANILFDPDAAQSMVSYATSFFTANSPCDYLKGSVNKGDKKIHNIEGCWLSKLKFDEKVYWRIRQWQTFAPQEEENTLPSQATKRADLVALLKGDMETAQTEKKRLEEKQRNDRKLRKEHGPQDGGH

>Bigna1|47756|estExt_Genewise1.C_170170
MAKDPVERFKWIITFVISGLHNGCRQNKPFNPILGETFQATYPDGTKIFLEQISHHPPVSQYELFGPNGSWKMCGFNEYKASFRPNGVVGGQYGPNRIEFEDGTVIEYSMPKVCVTGMMIGDWLFYWTGEIVFKDLKNNLTANILFDPDAAQSMVSYATSFFTANSPCDYLKGSVNKGDKKIHNIEGCWLSKLKFDEKVYWRIRQWQTFAPQEEENTLPSQATKRADLVALLKGDMETAQTEKKRLEEKQRNDRKLRKEHGPQDGGH

>Bigna1|61065|fgenesh1_kg.17_
MAKDPVERFKWIITFVISGLHNGCRQNKPFNPILGETFQATYPDGTKIFLEQISHHPPVSQYELFGPNGSWKMCGFNEYKASFRPNGVVGGQYGPNRIEFEDGTVIEYSMPKVCVTGMMIGDWLFYWTGEIVFKDLKNNLTANILFDPDAAQSMVSYATSFFTANSPCDYLKGSVNKGDKKIHNIEGCWLSKLKFDEKVYWRIRQWQTFAPQEEENTLPSQATKRADLVALLKGAPPLTSPPPKAQCVH

>Bigna1|36971|e_gw1.17.165.1
IKSMGQNIMEGKSIINISLPVKIFEPRSFLQRMTDHWAFAPVLFIATAMAKDPVERFKWIITFVISGAQPLSINKPFNPILGETFQATYPDGTKIFLEQISHHPPVSQYELFGPNGSWKMCGFNEYKASFRPNGVVGGQYGPNRIEFEDGTVIEYSMPKVCVTGMMIGDWLFYWTGEIVFKDLKNNLTANILFDPDAAQSKKREKKRERERERERERVG

>Bigna1|29539|gw1.17.165.1
IKSMGQNIMEGKSIINISLPVKIFEPRSFLQRMTDHWAFAPVLFIATAMAKDPVERFKWIITFVISGAQPLSINKPFNPILGETFQATYPDGTKIFLEQISHHPPVSQYELFGPNGSWKMCGFNEYKASFRPNGVVGGQYGPNRIEFEDGTVIEYSMPKVCVTGMMIGDWLFYWTGEIVFKDLKNNLTANILFDP

>XP_009493947.1_hypothetical_protein_H696_01762_[Fonticula_alba]
MSSKSDRELAEQEAIPGEQAYNNEDTAHLNSSVKNFMTSGESDVTKLKAPVWINEGDSMISRNLSQVYTDHFLDIPLGSTPEERLLRAMRFFFSHFSVNLLTKKKPFNPITGEFFRGSYSPGENSPHKGRKIVSYSELINHRPIVIGFHMEDVPTEEGGQPTVQYYGAIEIQAGFSGMTIRVKVLGDCFIRLPQHNETYRFNLPLSVLRGLLVGKSFMDMNGETKFECLETGLSASINFKEKPWFFGQYRNISATVRNAKDKKIYKLDGNWGKSIDLENLETGEKVPNFFLRDVALEIPVTMAPVEEMEELESVRLWEPVVTPLRAGDNPAAERAKDALEHLQRVLLKEVDENRYTYEPILFAPGPEEEIKKSTAPTFVLRPDHASRVSRSWLPDMVKIASAAKK

>XP_022841176.1_Oxysterolbinding_protein_[Ostreococcus_tauri]
MSCWCCFRSARSLDVANIQARFQPQDDDLWFDAREHWDGAEANVGDDCGEVTMENVGIKPGTEFPFVLGEVWEQEEHQMHAASAIREMKAKVRHLLRQAHEEAVRQAEEEAAELERLGTMTPEKREMHERIKAGQPTQELVGMTKHLKVGQDLTDIELPPSFFVPFSTIQVAEDVVYVIEACTNDWSDLKHPDPEVRIARLVKFYLDMTAIRTDAGSSAGAKSPYTFSAMKKPLNPILGETHRIKCGKTAYVAEQVCHHPPITTWDLRNEDIGLHVSADVKAKPVFRGTSVQVLIGGEMRFENLHTGEKYVMDFPSLFIRFFGLTGSYSETVGNISLRRVSDGPELRCDMHFKPRGTAGLKSHACKVEGTIVNEKGAHSHFKGKFSETIAEVSATKEHLGLFWSPALPLAEPPRAMTRPLNGFTDSHCLWGEFFQALIAKDMKTAAKAKKKAERGQRRLHKAMKTGELPPWTPTMFSTRDGERWELKDEYDERVQQSWLKYIGFRIYE

>XP_004353598.1_Oxysterolbinding_protein,_putative_[Acanthamoeba_castellanii_str._Neff]
MNALKCFMKKIATGGVLMHMSLPASLCCPQSTLQALAHHRLRGAPYMHGVWQHNDAFVRMVAVLRWYLAAFSADPDGKKPFNPVLGESYQCYADGVWAILEQVSHHPPVSAYFMLDSERRTCFFGQAEMCLEFSGNAIAVDMIGPARLVLGVKKSLARTQTPAQAQADEHRATGGGSGGGGGGEQQQPQEEVEEERGEGEWWARYEHYDFIPPMPTQVVKSLLWGKRRHSYKGDVVVACSRTGYFAHLHFCEEGPEGEPDFLRGEIYHEPEHMLVAQLYGQWDGIIEITPLASSLLRLGSNASLEPPERPAALTRGDYDAAEAAKEEVERQQREMVHQATVLTPWAGSSYSTYAEATATKKTKKKKKLFRKSSTDKQLVEASWGVDEEEERWRQMNPAVFFDRHRASRTGNVEWLVRWDQVRLAADRRENLL

>XP_012895426.1_uncharacterized_protein_[Blastocystis_hominis]
MVLDYFNILLESDYSSLSNEDRFLILLRFYLATISLIPSDIYKPCTPFLGETFACFVSTKQGRVSYIAEQVSLHPHITCFYVEDENHTFSVQCTLIPRGMFGGSSVRYTFDGSLTITHIPSQQTCTFTHPTLVSTNLDHGTPETQIAGSVSVSCSFDSLSALILFYLQPLTGGDHRVLRVHIKQDNTILYRIRGRWDLGYELIREETKEFSVWLEINSLQPLQRFVCPLDKQGALESVKVWITLRQEMIGGNDVEKAEKMWRDIETKKNEMCRRIEKRKDFDPNKRLLFEKKGEVYEFTHKGENFIELSMHLKHEELECSV

>CEM02035.1_unnamed_protein_product_[Vitrella_brassicaformis_CCMP3155]
MGECISCEEGPAMMMTKGGVAGGMREYQQFEDPSVSPREDNGVGVPAQIRGNTNSNGHSSSVSGGSREGRIWRVVEGPTDEGPVLKQLFFTLDVQRGKMTTHQRPSSRVLREIRIQKVAPLAPAEWTSCQDAFSFRVHGERGEVYQVTAGTKREYHDLYQAFTHAMPSAAAAPPTTSSSRTRTRPAIIAPPRSNRSPSIRQDVDGSVLVWVVGLVASLVERVLWGLENLSDMLRDGPVVVFRRPDDPPYESYRDRSSRPSDVTQGLVRGLILFTAEVLGGVLGPLTCPLQELQKGGGLERLPLAIVKGIAYLVCKPIAGVLDLVTETSRGLIETPRTIMAVLYPPPPPPPHQHTSHPPSATLPTQIADRGGVISVVTDAGHQPVEASMDESPSPEPTTTAAGGGGLRVGGEARERRSERRHRRNVSNAPADGGGVGAVSAQTRLQKALTVSLRALLDQTKGLPEVQASINRILDTQLSANPDFFDIDSDGDDSDTSITATYLERGDPMSEGLMDAMINDSEFECDAKSVVRRARESLCFSRDEAHPEGILKEVDEWVHPFSRDDFRIATATSVGPASGRTVRLRSRKCPACCDVTTDAKGGLLLADRDTFVLVRSVAKEVLKWIGRQILSGNFNLTRISFPIRCSKPGSSLQTTTLACTYVPLYLRRAAASRNPIERLKLVVAMYIASLHVTSDFLKPINPTLGETYQAFLPDGTRIYSEQTAHVPQTTHWQIVGAEDRFLFWGYSIFSAYAILNQMHLYNSGKRFVDFTDGHTVTMTKLPRDVWTGTLYGPVCRHEILGRMRVEDSLGNSCEYVFGSVRGKPTDYFEGTIKDSYGDILSRVNGTWLGYLDFDNVRYWDIRTTPNYPLLPVADEALLQSDSTLREDLLLLTEGRVRAAQEAKDRISDRHRYERALRRKAPPPPRPTSTPPPTPPALSPSRALSPDSSVSPPSSSAPNVSSSRAAALSQDSTSAATKGGATGGVGIEAGGVGKEHQPRTRETSVSGTPRVAEEHEGHEGGGGGGGGGEVGEDRTAQEQN

>XP_002672165.1_predicted_protein_[Naegleria_gruberi_strain_NEGM]
MMMASNTMLEDDKSINNNNNSSSVNEEELQKIINNNNNTNSIHTNNGTSACSSLVESNGDDRSSMVSSSDDDGSFEGRQDDIYHHPDFSHRGMIHKMKSNDSSSSSILWQFIKQLQPQVDLLRMCSPIFIMRPISTLELYTYYTEPTLALKVLREMDSELDRMLCCLLFSLISCSNTFGDSFEGLKPYNPILGEEFHAEWHSSVNEQQQEEKSGEKKTAMWLENWLSNQTSQDQERMQEMLKECKTKVTAEQVSHHPPISAFLMENEKCGWSMKSTFQILAKLKMNYVDLNIAGKHLLQVDLKNGETEEYDFTLPHVYANGLFWGSSTITNGEYLKVKCKKSGLTVKLNFGSGNDVSGSLTDRKGKTLLNLKGNICGKINITKGNSSDLYPSTLLPLIFKSDLPFFEAAFCKSLPFSNELVVKPLHEQKEYESRRVWHEVTYNILHDNKDKAFDCKHEIEEIQRAKASKLKLEGKTHETKIFKPTGHFSKHQNIPLYEK

>XP_004989199.1_uncharacterized_protein_PTSG_12933_[Salpingoeca_rosetta]
MSEHSTEYSNHGHDVDDHDDDLGDHHPHHQFHSHESASAFAGLFDRDSRKQRAIQERKYRAKREKYEEEKQRMLHRTGYDLSLKTIKTGLLKVRNQLRSWVKFYCELRHGMLIMYKEDKHDAWMDTILLSGGLVIERPSRKEGFTFKFSHPLKQSIHAPRGPRGELWINLLRMPSDHCIFRVATAEECDEWIAAFKHAIYGAHPAYDELMTGAITTGLVDDDDDLVARSPLSRLGTSGPAGARGRAGSGGDLAPSLEQPSALSLSLQKRLRAAGTQQAENEDKDQDDADDVVPQPRSSPPAEYSPPAPPVAVDETEWVPTAPLISDDDTAPAQVLSDETRNRLWAIAAKLDVGASLPVPIELRQPQSELQRLSDLFLHADFITDAAKHKLPRCRVVCVLRWAVSALCNRPAGMAVPLPAAPGEVFRCHFECPQHSATPPTRAFFVAELVDSSNHTVAFELTNRQAGWRVLGSLAPTTKFFGNTITHEYHGTISVRLDHFGETYSVQLPKRVTRGVINGRTSTCLQGALKVACAATGLSCTMHVDTHVRGSVTGRVTDAETDGLTISGSWSGGIHIARGETQQLLLACTSAELRARRLSKRVVAPSHLWTQASTDVDVTDSQVLWAAVQRALLQSSIGAAQAAYDRIIRTAAQQSNDRYYSKFFAPQSDGWLCTTTIDRAWDYGQDVYEYQQQGELKVLTVDDAGLQISGDTASPPTLRRRHASVHTDTDSHAAVDVAAYTRARAPTYATSPMSKAVTPVTPGDLTAAAASLPSNTWEREVQALEQRMLTVERMLARERLTLLTCILLFLLVLLLRSWSWSWPW

>XP_024365100.1_oxysterolbinding_proteinrelated_protein_4Clike_isoform_X1_[Physcomitrella_patens]
MFALLDTPVVKGAWITRTGRLVQRNTVNAWGMHFGLQELGREGSIYELIEEVALSSLESANVWSEVTAHVVNGNMEKAREAKRRVEDAQRVERDGRVSGDDLWSPKHFVATQSRSWEWRHAGAPVPPAPLVVLTYHPSARLNIIHQTSRHPDA

>ORZ39376.1_hypothetical_protein_BCR44DRAFT_1246742_[Catenaria_anguillulae_PL171]
MAKGTKLKPSAAAHVAASAPVSTGVSAASLKQPGNDETSNSSAPDLDRLKLGDNDTESNFEVEDDDGTTTPTKRGSSSSVAAAANAPPLVDDSHKDSFFSFLKSIIGKDVDQMRVAVPLWLLEPVSNLEYLASLEYLEHFVQAPAQPTPLGRMVNVTTMLLSSLKKATKKAKKPINPILSEVFFANFHSGQKPPAQANGTTSTVEQEDDEVHEDKDDPTLPPCCWLASRFRIIRQSLHSMRHVPQTVDIPAHNEHYNVTYPDANLTGVLTMNFRLMWTGTCTVECPQSGLKTTITFKEKRWFGKDTYELTGTIAHASSPKSPLATLSGNWNAAIHIDYADSTAGPQLLFDSSTTPPAYHMHIPPRAHAPENFSHNVWGDVMSAMVAGDAGKANRLKTEVENRQRAVAKERAEGKLEAYVPKLFRYDPKAKSQESRVEYIGGELPDRKTDLVEWFGRCGKPAS

>PPA1320048
MSHLENDPSLKSYADIHGEWEHREISIFGAVKSFISQLGIGQELTKVSMPSIFLMPYSILELAASRYLKYFHLLSGALYETDPSRRMAIVIQYFLSCIRDGNFTKKPYNALLGENHQCFVRYPAYEGEGTTTARFIAEQVSHHPPLSAFHISTTDGIAMDCNVQFSAKFHMNSVSIVTAGSIIITIPVRDGDKTINESYIIDKGLPDALVKNVIFGTRSINWTDSVDIMCQTSNTSATLHFDKNEFVKGDIYVYNEEAQEEEHHAYLNGYLCGVVNIDYLEGEKMKKSKKKHSKSRKHHYNPTDTVLIDTEKLEANQTQYPRTNDPMSSLNIWKGVTKHIIDGDMAASDVAKKEIEDEQRKRLRATKEDEKKDRVYFRFDDSLERWVFKGFPTPN

>XP_639330.1_oxysterol_binding_family_protein,_member_7_[Dictyostelium_discoideum_AX4]
MEADPSLVSYADQHGEWETREISIFGVVKSFISQLSIGQELTKVSMPSIFLMPYSILELAASRHLKYIHLLISAQHEEDPLKRMAIIIQYFFSCVRDGNFQKKPYNALLGEVHKCFVKYPSYDGQSTSTAQFIGEQVTHHPPLTAFNITTSEGITLDCNVQFSAKFHMNSVSVVTTGAVKICIPVKVGNQIIKETYIIDKGLPDALVKNVIFGTRSIYWTDSVDIMCEDSKTSATVHFDKNEYVKGEVSVYNTELEVEEHRASLKGYISDVVNIDYLESKSSEAAPASSASKKEKKKEKKKAKHSKHTCSPSDTILMDTKQLEPNSTLYPKQTDPITSLGTWKEVTKQIVAGDMQAADQIKKEIEDEQRKRLQITKEEEKKERAYFKYNDDKEIWEFKSTQTLAPVSNSTSSTASDAASGSN

>XP_009494619.1_hypothetical_protein_H696_02440_[Fonticula_alba]
MCSPKKPYNPVLGEFYRCQWKLDCGARAFFLSEQVSHHPPASAYFYSIPRYNISIEGVVGPKSKFLGNSATSIMNGFSRVTLGRRGETYLASLPNYYVRGLLIGQLSMELCDDAYVICPETRLATEVRFRAKPLFGGTPGRIDGTIGRIVHYQPPEALTDISFVLNKEARIVSTEARIGGRWDRAFSVTFKNPSCGVPIRFDSAIEPLARKAVPAPAEQHPYESQRIWQHLTRALQEGDFTAAEEAKALVENHQRDLRVARTAQASEIRRTEQQAQSDPQVNGNPPVASSGDMSAPVARTRTEVGRPPTPEDDAQRTNGDAEPGAAADLRPLLEARELWLPRFFEGSLAEGYRLRESLRREYDAAAGLEDDQLTDSPSRQELHWARSLEAAVSGDLIPDTHTAEGYDPKLLQALDRMRDERLMLPVDREEMARR

>KAA0146611.1_hypothetical_protein_FNF29_07944_[Cafeteria_roenbergensis]
MAASAAASSGAAAKPAATAAEHAGAAAAAVADSELLRSLCVPDPEYTLGGIHGDTEPSHPSVAMHLIRQLIPGQDLTRTAVPPWYLEPRSLLERFADIMMHPEMLLAAEGGKDAEARILGVAAWYLSGWHYRTTGVKKPTNPIIGETMGTFWVHEDGSRSTYLAEQVCHRPPISAMHVRNVTHGIEANAAIHTRSKFSAPQTAQSILEGGCSLQFHNHGEEYFVTFPTANALGLLFGTLRMELSGDVRIACAKTGLAVELSFHIAPFFGGADSKNRVTGALKRGDEKLGDIAGQWDSIVMLTRGGAAAPEVVMDLSKHTVAPKMVLPLGLQGPWESRRLWAPMFEAMNARPTVDWDAVTRLKNQMEEDQRRLPCHSHGHGQLTMGWAAKLFKPATVHDPVTSTDVPIWTLDEERLGLTRTDEVNAVALSRNTHDIRGGEPGPIPTGKAAEGLVSSAHAPAAVVAVAAAKAAKAAPAAAAAAAKPAPAPTAATTRPAPAAASKASKPADGKAAESGAGEATAPSAAAPQGDKPATDK

>XP_018636409.1_phosphatidylinositol_transfer_protein_[Toxoplasma_gondii_ME49]
MKVFEYRLVLPMTPEQYKRCQLYMVAKASLEDATKAEAEGAANDCMEILKNEEYTNEEGDTGQYTHKRINIANKLPGWLVSWVDPRLTVFDEKSWNAFPHLKTTYDCELFSKAKVSMISHHLPGVQTDDNALALDAAMLAQRKVVLIDIVNDPVASKAYVESEDPSRFHSKKAGIGPLRKDWMTNVPMVPDVSRSDAAVSSPREETEEKREETEEKREETISRGKHARLHVRSREKGNLSAAAAPAAETVHAENERMRPQYPIMTCYKLFVLDFPYFGFMASKVENWITGAMRDVLLNYHRKAVCWMDEWYELSMADIRKMEEEVKVKLDAIRGQTALPLLAPSAEGKAEAAPEASGAPQGSAGPSSEGEETRAGDGQGAGDSGWSPTSDEDGEFDSERDEPLDLQATLPFAVTVDALAPWSLDAPGIFPLSPNKAESQAGDSNSQVSPSVAPPRSDAGAPGAATAAPASVSPASEPPKETVLHSGFLYKLGDGIWNTTWNLRYVVLRNSRLQYFNDPRDTRAKCVVDLEGAEITWTGEMRGRMHSFYVHPACKRSMHFCGETADASRQWMAWLQEAAQRSDRAPGERRRFSSFSCSHHFLPKSFSPSLASRGGYAEQMAPPHLPPMEESRTSDGEASLARPPHASDSLERSQQADAPGRESGDTQAAKERHSADAGKERRETEREARVALDDEGARLSRHLSLGSVCSGDPHCRPGFSDRVAAGECEGVCDLLPSPEITPDLEYCVRRLKFLLSSRARSRFSPARNEDDVRVFVKDASQWVSLPPPKAVHIRESLSRQTSSSGAFPQGREDGTEDERDERGEKSQERGDAEECGRRPPPRAPRGALESAEFSERSLRLQRVQALLGLVLPIVLPAFALYQCVVLCLQGLACLSEAASLFFLFFSSLSSLCVSLLRIPFSSFQSVSSPSSSLFSLSPLSASFCAGAAEIPGDASSSFSACLLPALHIFLKYLLSQLLFFVLRVLLWILLPFFLGLRLASFSRLFSVDSPRPRTALPRPSRTGNALSVSPVVSSERGGATVDPSPPLSAAGRDLVVKASCVVDATAEELFFLLMDVEMMGSWMLAHTSSPRVVSESIHSDFLSLSFSPSLLLSSSPAATAEAFLAACSLFSRPAGHALCPGHAHRGGLAEKASVTLSAARVGMSPPFACLLSGDISAGVASAGAALAGPLLSPLLRDRRLAWRRWWGQTQDGSFVVVFHSEQQLLSSCMRAACEWHSCGAGREMNGRKGETRRETTETWTATAGARGRETEETDRKAVWATKVAEKVVSWTQRLSSLLFAANKEKREKRSRESPTALHGLLRLLGNVFPIAVHPLSRFPGAQMEKNKAAKTGEDSRETPWETSADAVLASGFEAFVITPLSPSLEQLAPPHNLASPDRDERAASGARTPRAAAGAPPCLLTFVSAVDWGGAMPRWLGERVSLLRADRILRGAKLESEMRRARKRTVPADQDLVAEDLLETLDTPTSDSDEDRQDELHSPSSPPSFDSPSEAAGAALSGYVQGWKRQDAKEEDSAAREELTRTRKRAPASPAPPRDDRRLPEALREFRRSPQGGLVALNLAAVDAQRAVFLELIQSRGEAVREGRGLVDVSLPVSILQPKSLLAFLGSCWGFAPFCLSRAADAQTDVLERFKWTVTFAVASLHLGCCQRMPFNPLLGETFQGHWPDGTRVFLEQTAIDPPSTAFLVRSAKSRFSFWGNFAFRAQLKGNYGVLRQEGETAVRFRHDETEIRFSQPTAKVSGLLWGPRVFEWGGNMDFRDEKNSLYCRLQFGVSKPTHSSSHVPSDFFYGEIKDTATGASRSVVTGSWIDQVNFDGKRYWDACSCPAPAPLEACTDSEALPTDSRFRQDILCLREGLIEEAQDWKLELDAVQRRDRAVRANRLALQQTAGVTASPA

>XP_014146554.1_hypothetical_protein_SARC_14787_[Sphaeroforma_arctica_JP610]
MLQRLVKYDVAKSDLTEWDSQKLWEKVSTAITNKDQVAATDEKNKLEEAQREAHKARVNRDETYAPRLFNRVLGTDRADGLSDEDYYVYRYFNLVKVWQVHGQQCIRTRMRISL

>XP_012898704.1_uncharacterized_protein_[Blastocystis_hominis]
MAEQVQQPTFPDLSGGIDYTKYTVEDPENTRGGEIAGEPYVQPSLFMHILKSLKPGQDLTRVLIPVFFLAPRSLLEHLGDMLMHVDLLDAPEVQGDDPYKRFMCILKWYLSSWHYKTHGCKKPYNPIIGETFSCIVDTGASRVSYVAEQVSHHPPVSAFYLENQKQGYCANGYIWTKSHFTGNSACGSMLGNIEVFFPRFGEVYSTMIPAFAGTGLFIGTLRMQLIDKLSLHCAQTGFKADIEFHGKPLFGGDYNRVTAVIYHNGTPIHRLRGHWDSAFYLAGPAGENEELFLDVTKLPVLPKKVLEIPRQGPFESRKLWNSVTCAIRRPEGPDWKTVEKEKTRLEDAQRKLPCQQKHESPEYRPWTQKLFVKVPHNGVGKMETGYRFKWFDLDMVKPDAPYRDFLALSRNAKDERVDVEPFSA

>CUG90286.1_oxysterolbinding_protein,_putative_[Bodo_saltans]
MIMLLGDNNNDNGTNTTNNNNLYYLIGALGGVAILVTVVSHCVVSLRISILASMLLQDPLVIVGDPVCLKKLSRTPWYGVSEVDTLQLAILQTYNAYALNNASSPMSGKRGRGEGGGYDSDLDKVEWRTAVSDDDRYTPVGGSGGVGNNNNSDQHIGSLPFDPLEAFLLSQKKHQPPIAPMQEADSTIAMERSDAAAAVHHRRTSSGGSGRSKAASVLQRFFTPRGGKTPAFPVAASHPGGVSAADADEPISQSYESADFRSFPPSSFDERSLLGSAKPTPRLLGQQQQQASSYGATTTNGIRASGSTGNINHSDSAEFVDMERAGGAPVSTSITVRPAASGSVIAHVDDEELCDPCRDNQNPQWHVLARGLKLQSSIFVQLLSSIRVGQSLSSVTLPVHILESRSLLEMLGDIFVNWEMLIPIAMDRIASPEERIIQMFKWFISGYHCKPRGPKKPYNPILGEVVQLKFPSYSNPAAGTFPVKSNGDRSLVYIAEQVSHHPPVTAFAASYANLLSVNGVYLPKGKMVGLNCAASIGEGSFVVTFPTTGYKYRLTFPTAYVSGIVAGTPQLELGGTVHISDLGGSTYSAAVEFLRKGWLSGSFDQVHCKIFKGGDGDQRNVVKEYIGTWHDKIFAKTPGASTSAKNAMGELFFDPKVLEAQLGGTHRPLAVNCANHPKQSRAIWRDLTPSLRAGNADVATTAKTRVENAQRLERKIMAQENREHETQFFKFIAGRLVKDASDEERGDEENWDFVGQTQLDRY

>XP_810669.1_oxysterolbinding_protein_[Trypanosoma_cruzi_strain_CL_Brener]
MAKTSRHRIVIFPFWVFNTALMFMLMVGLLVAMALVPESISGVRHANLYVIGAIMAAEVAAFVCFQHFMFFSRVKELSRILMEDPVITVGDLLFMEHIRSIPAMGVEEVVSLKIAIEQMFFALSSLWRDQGLLSLLKSNGNSAAAGGDRNAIMSLATCTAAIKAAAAEGGSYDEYVEPNLSSFSVEDYLLSRQYHYKQRLRPTRQSPCDVVVRASPLKRGLFHNFSRRDSTVASPTIEADFCTVCSSLGDGVEAIAIEQSSSTRHLSYQSSLPEPLSISEEENMRPKDEDNMHTYCGASNRQVVPALSAEDRALCDPLDDNSNNSFEVLTRYLHLEGAIIFQVLKTIRVGRSLSSVTLPVHILESRSLLEMISDMFLAWDILMPLALGEVHHPVDRMRILLRWFFSAYNWRPKGAAKKPYNPILGEVFRCKCPAPLPVSSPASLLSFPSPRERFSQAHDTSPEMNPKRSIDCMHFLAEQVCHRPPVSAFYAELPDLIVAEGVFVPHSKLVSLNCVASLSSSSVLVRFPKTGWSFRFSLPHAYASGVVAGTPRLELGGVVRLEDCQSLAHVTVDFRRKGFFSGKHDEVVAKISTEDGKEIAEEYVGLWNGPIYSRGTGKGVDVGKKRQNHHLRPQEGDGKELLFDAEIFQQQRGMPCCRPYAYPLHAGNDDHPYPKQSRAVWKDLTAAIRQGDVEAASNAKKIVEEAQRAERRQLEAEGRVYTPKFFEFIGAGKLSDVNEETLSRQENWRFTARDMLLN

>XP_814439.1_oxysterolbinding_protein_[Trypanosoma_cruzi_strain_CL_Brener]
MAKTSRHRIVIFPFWVFNTALMFMMMVGLLVAMALVPESISGVRHANLYVIGAIMTAEVAAFVCFQHFMFFSRVKELSRILMEDPVITVGDLLFMEYIRSIPAMGIEEVVSLKTAIEQMFFALSNLWRDQGLLSVLKSNGSSAAAGGDKNAFMCLATCTAAFKAATAEGGSYDEYVEPNLSSFSVEDYLLSRQYHYKQRLRPTRQSPCDVVVRASPLKRGLFHNFSRCDSTVASPTIEADFCTVCSSLGDEVEAIAIEQSSSTRHLSYQSSLPEPLSISEEESMLPKDEDNMHTYCGASNRQFVPALSAEDRALCDPLDDNSNNSFEVLTRYLHLEGAIIFQVLKTIRVGRSLSSVTLPVHILESRSLLEMISDMFLAWDILMPLALGEVHHPVDRMRILLRWFFSAYNWRPKGAAKKPYNPILGEVFRCKCPAPLPVSSPASLLSFPPSRERFSQAHDTCPEMNPKRSIDCMHFLAEQVCHRPPVSAFYAELPDLIVAEGVFVPHSKLVSLNCVASLSCSSVLVRFPKTGWSFRFSLPHAYASGVVAGTPRLELGGVVRLEDCQSLAHVMVDFRRKGFFSGKHDEVVAKISTEDGKEIAEEYVGLWNGPIYSRGTGKGVDVGKKRQNHHLRPQEGDGKELLFDAEIFQQQRGMPCCRPYAYPLHAGNDDHPYPKQSRAVWKELTAAIRQGDVEAASNAKKIVEEAQRAERRQLEAEGRVYTPKFFEFIGAGKLSDGNEETLSRQENWRFTARDMLLN

>XP_002677111.1_predicted_protein,_partial_[Naegleria_gruberi_strain_NEGM]
FLKQLTPQTELWRISVPTYILQPLSLLEKISHYSSPNNTIEKINEEESAEKRFISILAWVISNWRTIPRAGMQQSKPFNPVLGEIFKCEWNHGAADDNTKFLGEQVSHHPPVSAFCCHNEKRQFTYTGYVFPVTSFSWNSVTTLMDGEFKIDLGKFNEEYIVNHPPVSVSNVLWGNTVIEIYDYLKIKCPQSGFYADIYFDYGKDNYLSGYIYDAEGYKKHWIEGKVNQSVQIQNYSTSEKSTLYDVATLTRPTKIIKPVAEQEPRESRRNWHKAVHALKNEKFEDAQLEKHIVEERERAFRKERAEAGLTWTPKYF

>NP_001367357.1_Oxysterolbinding_protein_[Caenorhabditis_elegans]
MSSDEDGYDFGDSNEDFDEIYNNAEEHDIGNVQQDHGSVLMHLLSQVSVGMDLTKVTLPTFILERRSLLEMYADFFAHPDLFIATNGNDSAEKRMIAVVRYYLNSFYAARKSGVAKKPYNAILGETFRCRYSVPNSSLSGKKTESGPWPGSDEKQLTFIAEQVSHHPPISAFYAEMPSEGISFNAHIYTKSSFLGLSIGVASIGEGILTLHNYGDEQYTITFPSGYGRSIMSTPWFEFGGKVKVECEKTGYRADIEFLTKPFFGGKPHRIQGSICRDGAKKPVLTLRGEWNGTMYAKTQNGEEYVFVDVKAKPEVKKECVPVMQQGKRESRRLWRHVTAALLRNRIQTATTSKRFIEQRQRKEAKERLESGEKWTPLLFDTTDKDGEWMYKQKFGVRKAV

>NP_491691.1_Oxysterolbinding_protein_[Caenorhabditis_elegans]
MEGPLSKWTNMVHGWQYRWFKIENDTLLYYTSREKMLKGQQRGQIRLTGAVVGIDGENNSLFTITVEGKTFHMQGRDLRERNQWVRILENSIRASSGYAKNVSVGTTPSQHFKQRTEEANEFLKTLVEKVKALEQLKSGERAVDEKKTIDSLIAASNNLTNNVKHAIIYLQMAQARLDPNMKTEKLMFTHPDLNEKPSSRETPGTVSDSTQTSTDKPISGIQHLDHLKPQRAESYASSDEEEFYDADEELIDLDNFESEKSGQESGDSNRTSDAAIMSSDEDGYDFGDSNEDFDEIYNNAEEHDIGNVQQDHGSVLMHLLSQVSVGMDLTKVTLPTFILERRSLLEMYADFFAHPDLFIATNGNDSAEKRMIAVVRYYLNSFYAARKSGVAKKPYNAILGETFRCRYSVPNSSLSGKKTESGPWPGSDEKQLTFIAEQVSHHPPISAFYAEMPSEGISFNAHIYTKSSFLGLSIGVASIGEGILTLHNYGDEQYTITFPSGYGRSIMSTPWFEFGGKVKVECEKTGYRADIEFLTKPFFGGKPHRIQGSICRDGAKKPVLTLRGEWNGTMYAKTQNGEEYVFVDVKAKPEVKKECVPVMQQGKRESRRLWRHVTAALLRNRIQTATTSKRFIEQRQRKEAKERLESGEKWTPLLFDTTDKDGEWMYKQKFGVRKAV

>XP_032232192.1_oxysterolbinding_proteinrelated_protein_9_[Nematostella_vectensis]
MAVVMEGPLSKWTNVVKGWQYRWFVLDDNTGLLSYYTSKEKMMRGARRGCLRLKGANLGIDDEDDSTFTISCDQKTFHFQARDAEERERWIRALEDTIKRHSLIRKQRAAMVHEIEFDPMKENLDQRLAEAEAYYKILSKQIKVIQGKLIPESAQTQRYASIKESSQKMLDSVGECINRMNSTKMECEKCIKTVAQETESMLPIVPDHYSNSRQEQSNNPNPTSISDNNVDDILIDKLSIRPSKSESSLGPSPTSTTVTAGELSLSRVTSKSSFELTTPTSDVIATESFETLASLSGPKSIPNATPGGTYPSQVYSRSPSIARDQVPFASYSSSDEEDVEFFDADEFHEHSGERSEDDNSADLLLPIQKAAVLLNEDDYEPEESNVFGKELGADAVEQHSSVITHLLSQVRLGMDLTKVVLPTFILERRSLLEMYADFFAHPDLFSGIVDQPTPRDRMVQVVRWYLSAFHAGRKGSIAKKPYNPILGETFRCFWVLPEFASTRSQESLEEGPVPWAAKEDVTFIAEQVSHHPPISAFYAENRAKSISFGAHIWTKSKFLGLSVGVENVGQGCVSVLPFDEEYIVTFPNGYGRSILTVPWMEIGGKVAITCAKTGYSATVQFHCKPFYGGKKHRISCEVMAPSEKKPFLTIQGEWNGQMYAKFADDEEETLFIDTKTLPITQKMVKRIQKQEEFESRRLWQDVTINLKKGDVDKATEAKHKLEERQRGEARERKELGTNWETKLFHEVGGHWVYDKLLQK

>NP_610534.3_uncharacterized_protein_Dmel_CG1513,_isoform_A_[Drosophila_melanogaster]
MASTTGSAPSLGPPQSGSGGSGTLEGTLSKWTNVMKGWQYRFFVLDENAGLLSYYTSKDKMIKGVRRGCVRLKDALIGIDDQEDNTFTITVDHKTFHFQARHNEEREQWVRRLEDTIRRHANRSRLWDSQSAFYIAGGYTKEGGGSGTGGRRPNHLELVARRVSEADAYLQLMIEQTNLLDKRIAELTDPAEQSKCKALQDNANAMLDHIKHSIVSLQIAKNMAHPINGIYNGPPATASTSSSTSGVAMGSCNNVQAGGLKVPLEGQVIGKGELVDDEEDSATENATTAPLGLIVPATSYSSSEGEEDFYDAYDDPFTSIGSSPIGCATRGFAETTSPTHEKAPDGFANAEPVAVGDSVAPQTLPEIDESVADADTSIKTARTAVSSRSASYDNGIDYDALYEEEEETDLSMEAHGSMITHLLSQVKIGMDLTKVVLPTFILERRSLLEMYADYFAHPDLFIKISDLDDPRDRIVQVCRWYMSAYHAGRKSAVAKKPYNPILGEVFQCHWDIPGISQDAQEVRDGPVPWCRRDQLTFLAEQVSHHPPISAFYAEHYNKKITFAAHVWTKSKFLGLSIGVHNIGEGVVTLVDRSEEYIVTFPNGYGRSILTVPWIELGGSVEIKCPQSGYYANVEFLTKPFYGGKRNRVSAEVYAPSEKKPFVSITGEWSGLMEAKWHDKNKTEVFVDVNRIPIFKKQVRPIVEQDEYESRRVWKEVTAGLKFNDIERATTAKFVVEQQQRDQAKVRKEYDLAWEHKHFKPVGDNWIYAKPLSQRMYLQEKEAKR

>NP_001260838.1_uncharacterized_protein_Dmel_CG1513,_isoform_C_[Drosophila_melanogaster]
MFKKWVRRVSLSATRGFAETTSPTHEKAPDGFANAEPVAVGDSVAPQTLPEIDESVADADTSIKTARTAVSSRSASYDNGIDYDALYEEEEETDLSMEAHGSMITHLLSQVKIGMDLTKVVLPTFILERRSLLEMYADYFAHPDLFIKISDLDDPRDRIVQVCRWYMSAYHAGRKSAVAKKPYNPILGEVFQCHWDIPGISQDAQEVRDGPVPWCRRDQLTFLAEQVSHHPPISAFYAEHYNKKITFAAHVWTKSKFLGLSIGVHNIGEGVVTLVDRSEEYIVTFPNGYGRSILTVPWIELGGSVEIKCPQSGYYANVEFLTKPFYGGKRNRVSAEVYAPSEKKPFVSITGEWSGLMEAKWHDKNKTEVFVDVNRIPIFKKQVRPIVEQDEYESRRVWKEVTAGLKFNDIERATTAKFVVEQQQRDQAKVRKEYDLAWEHKHFKPVGDNWIYAKPLSQRMYLQEKEAKR

>NP_001163104.1_uncharacterized_protein_Dmel_CG1513,_isoform_B_[Drosophila_melanogaster]
MFKKWVRRVSLSATRGFAETTSPTHEKAPDGFANAEPVAVGDSVAPQTLPEIDESVADADTSIKTARTAVSSRSASYDNGIDYDALYEEEEETDLSMEAHGSMITHLLSQVKIGMDLTKVVLPTFILERRSLLEMYADYFAHPDLFIKISDLDDPRDRIVQVCRWYMSAYHAGRKSAVAKKPYNPILGEVFQCHWDIPGISQDAQEVRDGPVPWCRRDQLTFLAEQVSHHPPISAFYAEHYNKKITFAAHVWTKSKFLGLSIGVHNIGEGVVTLVDRSEEYIVTFPNGYGRSILTVPWIELGGSVEIKCPQSGYYANVEFLTKPFYGGKRNRVSAEVYAPSEKKPFVSITGEWSGLMEAKWHDKNKTEVFVDVNRIPIFKKQVRPIVEQDEYESRRVWKEVTAGLK

>XP_002600496.1_hypothetical_protein_BRAFLDRAFT_57593_[Branchiostoma_floridae]
MLESIKHSIVLMQVAKTGSHTSSPISGPVVTLALQVPVLPQTSYSSSEDEDFFDADEFYQASPEKSPSSNVMMRGGICIVTDSSGSEEESTENMENHQSVITHLLSQVKLGMDLTKVVLPTFILEKRSLLEMYADFFAHPDLFSSIPDFEDPKDRMIGVIRWYLSAFHAGRKGSVAKKPYNPILGETLRCFWDLGTDNLDGEQELVTDGPIPWATRDNVTFIAEQVSHHPXISAFYAEHYNKNISFNAHIWTKSKFLGLSIGVHNIGQGCVWVRKYDEEYIVTFPNGYGRSILTIPWMELGGKVTITCAKSGYSCNIDFLTKPFYGGSKHKIKADVMGPSEKKPFCVIEGEWNGVMYAKWATGQEEVFVDTKKMKIMKKKVQKLEDQGEYESRKLWNRVTEALSSRNIDSATEAKQFLEERQRREARERKEAGVKWETKLFHEDGEQWIYDNPLQKRLELQDKLQ

>XP_009302132.1_oxysterolbinding_proteinrelated_protein_9_isoform_X1_[Danio_rerio]
MASIMEGPLSKWTNVMKGWQYRWFVLDYNAGLLSYYTSKDKMMRGSRRGCVRLRGAVIGIDDEDDSTFTITVDQKTFHFQARDADEREKWIHALEGTILRHTLQQEAETGFVPSVQDFDKKLAEADAYLQILIDQLKLFDEKIKDCKEDESRRKIENLKDTTCNMVESIKHCIVLLQIAKSTINPVDGVFQPTPLNAAVVSASAMPTQTTLPTDGAQVCKAEQRPSSLPVGPVVTVMGSLQTPTPNSTGSGPSGPSSSVTSPSHMNVPAHTVPDFSYSSSEDEFYDADEFYQNSTSPKHCIDPSRSSAVNNEDSTALKRPDTNESINSSMSNGTTDADQFDSHDEKDDDGEGESVEEHKSVIMHLLSQVRLGMDLTKVVLPTFILERRSLLEMYADFFAHPDLFVSIAEQQDPRDRMVQVVKWYLSAFHAGRKGSVAKKPYNPILGEVFFCHWDLPSETEDPAASECVSDGPVPWSSKNSVSFVAEQVSHHPPISAFYAECFSKKIQFNAHIWTKSKFLGMSIGVHNIGQGCVSCLEYDEHYILNFPNGYGRSILTVPWVELGGECNISCSKSGYSANIVFHTKPFYGGKKHRITAEIFAPNDKKSYCSIEGEWNGVMYSKLATGENAVFIDTKKLGLIKKKVRKLEDQLEYESRCLWKDVTMNLKLKDIDAATEAKHRLEEKQRAEARERKEKEMQWETRLFHEDGECWVYDKPLLKRH

>NP_001071273.1_oxysterolbinding_proteinrelated_protein_9_[Danio_rerio]
MASIMEGPLSKWTNVMKGWQYRWFVLDYNAGLLSYYTSKDKMMRGSRRGCVRLRGAVIGIDDEDDSTFTITVDQKTFHFQARDADEREKWIHALEGTILRHTLQQEAETGFVPSVQDFDKKLAEADAYLQILIDQLKLFDEKIKDCKEDESRRKIENLKDTTCNMVESIKHCIVLLQIAKDQSNEQQHANGLISTINPVDGVFQPTPLNAAVVSASAMPTQTTLPTDGAQVCKAEQRPSSLPVGPVVTVMGSLQTPTPNSTGSGPSGPSSSVTSPSHMNVPAHTVPDFSYSSSEDEFYDADEFYQNSTSPKHCIDPSRSSAVNNEDSTALKRPDTNESINSSMSNGTTDADQFDSHDEKDDDGEGESVEEHKSVIMHLLSQVRLGMDLTKVVLPTFILERRSLLEMYADFFAHPDLFVSIAEQQDPRDRMVQVVKWYLSAFHAGRKGSVAKKPYNPILGEVFFCHWDLPSETEDPAASECVSDGPVPWSSKNSVSFVAEQVSHHPPISAFYAECFSKKIQFNAHIWTKSKFLGMSIGVHNIGQGCVSCLEYDEHYILNFPNGYGRSILTVPWVELGGECNISCSKSGYSANIVFHTKPFYGGKKHRITAEIFAPNDKKSYCSIEGEWNGVMYSKLATGENAVFIDTKKLGLIKKKVRKLEDQLEYESRCLWKDVTMNLKLKDIDAATEAKHRLEEKQRAEARERKEKEMQWETRLFHEDGECWVYDKPLLKRH

>XP_005166957.1_oxysterolbinding_proteinrelated_protein_9_isoform_X3_[Danio_rerio]
MSRRGKHREAETGFVPSVQDFDKKLAEADAYLQILIDQLKLFDEKIKDCKEDESRRKIENLKDTTCNMVESIKHCIVLLQIAKDQSNEQQHANGLISTINPVDGVFQPTPLNAAVVSASAMPTQTTLPTDGAQVCKAEQRPSSLPVGPVVTVMGSLQTPTPNSTGSGPSGPSSSVTSPSHMNVPAHTVPDFSYSSSEDEFYDADEFYQNSTSPKHCIDPSRSSAVNNEDSTALKRPDTNESINSSMSNGTTDADQFDSHDEKDDDGEGESVEEHKSVIMHLLSQVRLGMDLTKVVLPTFILERRSLLEMYADFFAHPDLFVSIAEQQDPRDRMVQVVKWYLSAFHAGRKGSVAKKPYNPILGEVFFCHWDLPSETEDPAASECVSDGPVPWSSKNSVSFVAEQVSHHPPISAFYAECFSKKIQFNAHIWTKSKFLGMSIGVHNIGQGCVSCLEYDEHYILNFPNGYGRSILTVPWVELGGECNISCSKSGYSANIVFHTKPFYGGKKHRITAEIFAPNDKKSYCSIEGEWNGVMYSKLATGENAVFIDTKKLGLIKKKVRKLEDQLEYESRCLWKDVTMNLKLKDIDAATEAKHRLEEKQRAEARERKEKEMQWETRLFHEDGECWVYDKPLLKRH

>XP_009302133.1_oxysterolbinding_proteinrelated_protein_9_isoform_X2_[Danio_rerio]
MPSPTAMFRHCMLWLYSKKARDADEREKWIHALEGTILRHTLQQEAETGFVPSVQDFDKKLAEADAYLQILIDQLKLFDEKIKDCKEDESRRKIENLKDTTCNMVESIKHCIVLLQIAKDQSNEQQHANGLISTINPVDGVFQPTPLNAAVVSASAMPTQTTLPTDGAQVCKAEQRPSSLPVGPVVTVMGSLQTPTPNSTGSGPSGPSSSVTSPSHMNVPAHTVPDFSYSSSEDEFYDADEFYQNSTSPKHCIDPSRSSAVNNEDSTALKRPDTNESINSSMSNGTTDADQFDSHDEKDDDGEGESVEEHKSVIMHLLSQVRLGMDLTKVVLPTFILERRSLLEMYADFFAHPDLFVSIAEQQDPRDRMVQVVKWYLSAFHAGRKGSVAKKPYNPILGEVFFCHWDLPSETEDPAASECVSDGPVPWSSKNSVSFVAEQVSHHPPISAFYAECFSKKIQFNAHIWTKSKFLGMSIGVHNIGQGCVSCLEYDEHYILNFPNGYGRSILTVPWVELGGECNISCSKSGYSANIVFHTKPFYGGKKHRITAEIFAPNDKKSYCSIEGEWNGVMYSKLATGENAVFIDTKKLGLIKKKVRKLEDQLEYESRCLWKDVTMNLKLKDIDAATEAKHRLEEKQRAEARERKEKEMQWETRLFHEDGECWVYDKPLLKRH

>XP_005166958.1_oxysterolbinding_proteinrelated_protein_9_isoform_X4_[Danio_rerio]
MVESIKHCIVLLQIAKDQSNEQQHANGLISTINPVDGVFQPTPLNAAVVSASAMPTQTTLPTDGAQVCKAEQRPSSLPVGPVVTVMGSLQTPTPNSTGSGPSGPSSSVTSPSHMNVPAHTVPDFSYSSSEDEFYDADEFYQNSTSPKHCIDPSRSSAVNNEDSTALKRPDTNESINSSMSNGTTDADQFDSHDEKDDDGEGESVEEHKSVIMHLLSQVRLGMDLTKVVLPTFILERRSLLEMYADFFAHPDLFVSIAEQQDPRDRMVQVVKWYLSAFHAGRKGSVAKKPYNPILGEVFFCHWDLPSETEDPAASECVSDGPVPWSSKNSVSFVAEQVSHHPPISAFYAECFSKKIQFNAHIWTKSKFLGMSIGVHNIGQGCVSCLEYDEHYILNFPNGYGRSILTVPWVELGGECNISCSKSGYSANIVFHTKPFYGGKKHRITAEIFAPNDKKSYCSIEGEWNGVMYSKLATGENAVFIDTKKLGLIKKKVRKLEDQLEYESRCLWKDVTMNLKLKDIDAATEAKHRLEEKQRAEARERKEKEMQWETRLFHEDGECWVYDKPLLKRH

>XP_031756044.1_oxysterolbinding_proteinrelated_protein_9_isoform_X1_[Xenopus_tropicalis]
MTPNVVLLFPCSKMASIMEGPLSKWTNVMKGWQYRWFVLDYNAGLLSYYTSKDKMMRGSRRGCVRLRGAVIGIDDEDDSTFTITVDQKTFHFQARDADEREKWIHALEETILRHTLQIQQGLDSGFVPSVQDFDKKLAESDAYLQILIDQIKLFDDKIQSCKDDEQRKKIEDLKDTTCSMVESIKHCIVLLQIAKDQTNEEKHADGFISTINPVDSIYQPSALESVVIPTMPTQASPVPESVQVCKGEPRPSSLAVGPVVSNLGSRQSPTPISTVLFHNTGSGQSAPSSSLTSPSHVNLSPNTVPDFSYSSSEDEFYDADEFYQSSTSPKRCMELLSSCSSESATALTHSSTGASLKRPDTTESLNSSMSNGTNEAEQFDTHDDRDDDGEGESVEEHKSVIMHLLSQVRLGMDLTKVVLPTFILERRSLLEMYADFFAHPDLFVSIGEHKDPKDRMAQVVKWYLSAFHAGRKGSVAKKPYNPILGEVFQCHWALPGLENDENPEAVSEGPIPWASKNNVTFVAEQVSHHPPISAFYAECYNKRIQFNAHIWTKSKFLGMSIGVHNIGQGCVSCLDYDEHYILTFPNGYGRSILTVPWVELGGECTINCSKTGYNATITFHTKPFYGGKKHRVTAEIYSPNDKKPFCSIEGEWNGIMYAKNANGENTVFIDTKKMPTVKKKVRKLEDQEEYESRRMWKDVTFNLKIKDIDAATEAKHRLEEKQRAEARERKEKEKQWETRLFHEDGECWVYDEPLLKREPSLRY

>XP_422468.4_oxysterolbinding_proteinrelated_protein_9_isoform_X1_[Gallus_gallus]
MASIMEGPLSKWTNVMKGWQYRWFVLDYNAGLLSYYTSKDKMMRGSRRGCVRLRGAVIGIDDEDDSTFTITVDQKTFHFQARDADEREKWIHALEDTILRHTLQLQGVDSGFVPSVHDFDKKLTEADAYLQILIDQLKLFDEKLQNCKDDEQRKKIESLKETTSSMVESIKHCIVLLQIAKDQNNEEKHADGLISTINPVDAVYQPSPLEQPVISAMPSQTVIPPEPQLCKSEQRPSSLPVGPVVAALGNQTPTPNSTGSGQSAPSSSLTSPSHVNLSPNTVPDFSYSSSEDEFYDADEFYQSSSSPKRCMDSSGSAAVLTRSSTGSSLKRPDTTESLNSSMSNGTNDADLFDPPDDRDDDAEGESVEEHKSVIMHLLSQVRLGMDLTKVVLPTFILERRSLLEMYADFFAHPDLFVSISDQKDPKERMVQVVKWYLSAFHAGRKGSVAKKPYNPILGEIFRCHWVLPGTEGEDDMEPVSEGPVPWVSKSNVTFVAEQVSHHPPISAFYAECFNKRIQFNAHIWTKSKFLGMSIGVHNIGQGCVTCLDYDEHYILTFPNGYGRSILTVPWIELGGECSISCSKTGYNASIVFHTKPFYGGKKHRITAEIFSPNDKKPFCSVEGEWNGVMYAKYSTGENNVFIDTKKMPIIKKKVRKLEDQEDFESRCLWKDVTYNLKIRDIDAATAAKHALEERQRAEARARKENETPWETRLFHEDGECWVYDEPLLKRLAAGKH

>XP_007480242.1_PREDICTED:_oxysterolbinding_proteinrelated_protein_9_isoform_X1_[Monodelphis_domestica]
MASIMEGPLSKWTNVMKGWQYRWFVLDYNAGLLSYYTSKDKMMRGSRRGCVRLRGAVIGIDDEDDSTFTITVDQKTFHFQARDADEREKWIQALEETILRHTLQLQISTTLAFFQSSGISPVLEFSKIIGVDSGFVPSVQDFDKKLTEADAYLQILIDQLKLFDNKLQNCKDDDQRKKIETLKETTNNMVESIKHCIVLLQIAKDQSNEEKHAYGLISTINPVDAIYQPNPLEPVVSTMPTQTAFPPEPAPMCKSEPRPSSLPVGPVVASLGHPQTPTPNSTGSGHSAPSSSLTSPSHVNLSPNTVPEFSYSSSEDEFYDADEFHQSSSSPKRFIDSSGSASVLTHSSSGNSLKRPDTTDSLISSISNGMSDADLFDSHDDRDDDGEAGSVEEHKSVIMHLLSQVRLGMDLTKVVLPTFILERRSLLEMYADFFAHPDLFVSISDQKDPKERMVQVVRWYLSAFHAGRKGSVAKKPYNPILGEIFQCHWTLPMENEENAEPMSEGPVPWGSKNCVTFVAEQVSHHPPISAFYAECFNKRIQFNAHIWTKSKFLGMSIGVHNIGQGCVSCLDHDEHYILTFPNGYGRSILTVPWVELGGECTISCSKTGYSANIVFHTKPFYGGKKHRITAEIFPPNDKKSFCSIEGEWNGVMYAKYATGENTVFIDTKKMPIVKKKVRKLEDQDEYESRCLWKDVTYNLKIRDIDAATEAKHRLEERQRAEARERKEKDIQWETRLFHEDGECWVYDEPLLKRLGASKH

>NP_001333431.1_oxysterolbinding_proteinrelated_protein_9_isoform_d_[Mus_musculus]
MASIVEGPLSKWTNVMKGWQYRWFVLDYNAGLLSYYTSKDKMMRGSRRGCVRLRGAVIGIDDEDDSTFTITVDQKTFHFQARDADEREKWIHALEETILRHTLQLQISTTLAFFQSSGISPVLEFSKIIGLDSGFIPSVQDFDKKLTEADAYLQILIEQLKLFDDKLQNCKDDEQRKKVETLKDTTNSMVESIKHCIVLLQIAKSTINPVDAIYQPSPLEPVISTMPSQTALPPEPAQLCKSEQRPSSLPVGPVLATLGHHQTPTPNSTGSGNSPPSSSLTPPSHVNLSPNTVPEFSYSSSEDEFYDADEFHQSGSSPKRLIDSSGSASVLTHSSSGNSLKRPDTTESLNSSMSNGTSDADLFDSHDDRDDDGEAGSVEEHKSVIMHLLSQVRLGMDLTKVVLPTFILERRSLLEMYADFFAHPDLFVSISDQKDPRDRMVQVVKWYLSAFHAGRRGSVAKKPYNPILGEIFQCHWTLPNDTEENAELVSEGPVPWVSKNSVTFVAEQVSHHPPISAFYAECFNKKIQFNAHIWTKSKFLGMSIGVHNIGQGCVSCLEYDEHYILTFPNGYGRSILTVPWVELGGECNINCSKTGYSANIVFHTKPFYGGKKHRITAEIFSPNDKKSFCSIEGEWNGIMYAKYATGENTVFVDTKKLPIIKKKVRKLEDQNEYESRSLWKDVTFNLKIRDIDAATEAKHRLEERQRAEARERKEKEIQWETRLFHEDGECWVYDEPLLKRLGAVKH

>NP_683707.3_ORP9_Homo_sapiens
MASIMEGPLSKWTNVMKGWQYRWFVLDYNAGLLSYYTSKDKMMRGSRRGCVRLRGAVIGIDDEDDSTFTITVDQKTFHFQARDADEREKWIHALEETILRHTLQLQISTTLAFFQSSGISPVLEFSKIIGLDSGFVPSVQDFDKKLTEADAYLQILIEQLKLFDDKLQNCKEDEQRKKIETLKETTNSMVESIKHCIVLLQIAKSTINPVDAIYQPSPLEPVISTMPSQTVLPPEPVQLCKSEQRPSSLPVGPVLATLGHHQTPTPNSTGSGHSPPSSSLTSPSHVNLSPNTVPEFSYSSSEDEFYDADEFHQSGSSPKRLIDSSGSASVLTHSSSGNSLKRPDTTESLNSSLSNGTSDADLFDSHDDRDDDAEAGSVEEHKSVIMHLLSQVRLGMDLTKVVLPTFILERRSLLEMYADFFAHPDLFVSISDQKDPKDRMVQVVKWYLSAFHAGRKGSVAKKPYNPILGEIFQCHWTLPNDTEENTELVSEGPVPWVSKNSVTFVAEQVSHHPPISAFYAECFNKKIQFNAHIWTKSKFLGMSIGVHNIGQGCVSCLDYDEHYILTFPNGYGRSILTVPWVELGGECNINCSKTGYSANIIFHTKPFYGGKKHRITAEIFSPNDKKSFCSIEGEWNGVMYAKYATGENTVFVDTKKLPIIKKKVRKLEDQNEYESRSLWKDVTFNLKIRDIDAATEAKHRLEERQRAEARERKEKEIQWETRLFHEDGECWVYDEPLLKRLGAAKH

>XP_004364608.2_oxysterol_binding_protein_[Capsaspora_owczarzaki_ATCC_30864]
MMSGMGGLEASVPALHPQHQHQQHQQRSSNASSNSSHPREFPIVTDSGTIEGPVEKWTNYVTVWQGRWLVLDPEEGTLDYYVGKKKQGTAKAGLHLKLATIILDESSDDQFMVTAPGVRTFHLRARDTKERARWHHVLMKVQIDIQARSRLSHQLHIQQAHKAHPNAAAAAADSNATVAGSAGQPASALDASASSSSGSATVSAIAGVQQTRALASAIAKASEARSYSHVMQQQVDSLLEILGASASEEARETALLVKASAHAMIKSLDYAVHAVEVAAGKAPTPLRSLSIPPSPQPVTHAEATTRRDSTSSGPLKKPTLARSISSESVDSDTSFYDAQSDLVSGDDSTTLTATSTGEPSVPEISKPGEEQETTEADLGADGYNSDQDESQAILDSDDEEEDSEDADKSVLMHILSQLRIGMDLTKVVLPTFILEKRSLLEMYADFMAHPDIFVGVAQLPDPRTRFMEVLRWYLSAFHVGRKSSVAKKPYNPILGETFRCQYITPNGGPLNFVAEQISHHPPVSAFYAECPNTKIRLDAHIWTKSKFLGLSVGVINVGEARIALQPTAANQIPGTQPEVYVLTFPSAYARSILSIPWVELASKTTLTCARTGFSATIDFHAKPTFGGKPHQVSAEVMHVSSPKPIIKLSGEWNGVISSKNMATGQTSVFLNTKVMSIIKKQVTPVSSQNEFESRRLWKDVTEALKSRQVDAATVAKAKLEDRQRAEAKERKERGVEWRTKLFERHDDGAWRYNGSGGSVYA

>XP_004346676.2_oxysterol_binding_protein_9_[Capsaspora_owczarzaki_ATCC_30864]
MQDSSDEEEEAPSDQKSVIFHLLKQLSIGMDLTKVTLPTFVLEKRSLLEMYADFMANPMAWLKVGDSNDPKERMMQCVFAYITSFHGFKKGTIAKKPYNPIIGETFECQYDLTAEGAGISTYFAEQVSHHPPVSAFYFENKQKGISIAADVWTQSKFLGTSVASLLVGQSTLTLHKRNEQYVMTYPNVYGRSILSVPKLELGGKTTIVCSQTGFTADVEFKTKPMFGGSYHELLCTVKEPNAKAPFVKISGKWNEVLVIQYTGAKEAPYFDAAKAIKVNKSVRALDVQAPFESRRLWKDVTENLRAGNIPAATAAKELLENRQRQEAAERKQANTEWKVKHFSKNDQGRWIYHHAA

>XP_032220980.1_oxysterolbinding_proteinrelated_protein_11_isoform_X1_[Nematostella_vectensis]
MAAPTVIHDPSGDIDLTIYTEEERVAIVSVMERAKSFQKQEENKFRQPMEGQLMKWTNYMKGWQYRWFTLDPDAGIFDYYVDKEKMKQGPRGSVNLAGASVCPSDEDSFTFSVNAINGDVFKLRANNAKERQHWINTLRSVAEFHTQNMAPIVPQSVTLSPSLGSIQSSQPSQPSDSSSAITEPVSEASEETENSTQSFFKRGHKPFSHVPANINSDLAGIREILHCIEDDQITMIDQLELEPLAEESIYPLDEDVLLLKATAQSTLSSLHHCFSILQRRVAEVQSEEMPQGGGVTLEWLEPSESSSPTPKPAPSKPSPDMRHLRSLRTPGTPKNQAKQPERSGADDSAENPSVSCCEQALISMDKNAGVLCRNGEVTDEVVYSSGEEPEHQSVEEHKSVILHLLSQLKLGMDLTKVVLPTFILEPRSLLEMYADFFAHPDMFIRIADGLTAEDRILAVLEFYLTSFHVGRKGSLAKKPYNPILGETFTCSWDVREECSTGMERNPLNLANDVSVMEDDRGLRFVAEQISHHPPVSGFYAECPRKKICLNAHIWTKSKFYGMSIGVANVGEAVITLLEHEEEYHFTFPSAFCRSILTFPWVELGGKLHITCPKTGYNASVTFHTKPFYGGKLHRVTGEVKNASTGKVICKVAGEWNGKIEFNYTSNQEQAKVIDTKTLKVHHKRVRPVLSQEDNESRRLWHTVTLGLRSKNTVSATEAKHALEEKQRKEARERAETGAEWKPRMFHRHNEGWRFNQHLSRRQSESDTKEAAAS

>XP_002108734.1_hypothetical_protein_TRIADDRAFT_20121_[Trichoplax_adhaerens]
MLCLWQFSKVYEGSLLKYTNVVKGWQNRWFVLDFQKGTLTYFLTEDKRKQNNPRGSLPLSGALISPSDEDSQSFGIHASTAEVYKIKAADAKSRQAWILRLRKCAEHHTKKIALNVTQPQTIGSRITSLMSYTPSFRSKERPPFATRRSSTGGSTALDAKLKKLLSNAEVHCLNFRERLERCPLSGGALNIVDDIVLLLNATSAATIDVLSDCAKLLQQRVAEQQHMAGLPAGNTIKWYTPQRNPSDNQKDAKAANISIKTSAVNPQAKKELFSDEMKVSSETKESSIHTIPADQNTANNINVSNTTKSHKSVIMHLLGQLKLGMDLTKVTLPTFILERRSLLEMYADFFAHPDLFLRIVDGLTPKERMLYVIEWYLTSFHSGRKGSVAKKPYNPIIGETFHCSWNLNNVQNDLGGPPQTGDLSFVAEQVSHHPPVSGFYAECESKRMCLNAHIWTKSKFQGISIGVANVGEAVLSLIDFGEDYVFTLPSAYCRSILTVPWVELGGKVTVECAATNYSAALTFHTKPFYGGKINRISGDIKHPSGQIMYRINGEWNGTMEITDTAEVNKVINTKALPVVSKIVQPLRSQGEFESRRLWRHVTKALKNKDVDSATKYKRTLEDRQRSEARQRKEENKEWETKYFQKRGDGWLYSNNLKSREENLI

>XP_002603246.1_hypothetical_protein_BRAFLDRAFT_226345,_partial_[Branchiostoma_floridae]
GQLAKYTNLITGWQYRWFVLDPDSGVLDYYVNEESKKQRPRGSLQLAGSVMSPSDEDSHTFSINAANGEVYRLRAFDAKERQQWVNRLRSVAQYHTETLAQFLHSFMISYSSRTQSQPPNTAPVIHTTPHKKTPPAAPPVHEPQAFQNVREVLHQAEQQQVSLSRVIEGLPTATQGVRSLDHDLLLLKATSQTTMQCLGQCFAILQHSHMAETKTPSLPKGATIEWLEPRSPPNATPPSSRKKLPKSSSFPSNMSANQDICFGSGMLEVYDINHDNEVMDDIDQDEADLGTVEEHKSIILHLLSQLKLGMDLTRVVLPTFILEKRSLLEMYADFMAHPDLFLCIPEAESPEDRMMAMVEYYLTAFHVGRKGSLAKKPYNPIIGEVFHCSWDIPTTQPCNSQSETATSSNSQSETSTSPNNQSEENGGYHRVVFTAEQVSHHPPVSAFYAECKEKNVSMNAHIWTKSKFMGMSIGVVNVGEGVVHDVTHGEEYTFTLPSAYARSILTVPWVELGGKINITCAKTGWQAGITFHTKPFYGGKLHHISGEVKHQPTNRVICKIQGEWNGSIEFTYCNGYRGNDTKVIDTAKLSKIRKKVRPINMQGEFESRNLWQNVTAALKSNDIERATEHKRFLEERQRKEERAREEHRIAWHTKLFHRKGEGWVHNNLLEASQ

>XP_007505280.1_PREDICTED:_oxysterolbinding_proteinrelated_protein_10_[Monodelphis_domestica]
MDKAAAAGGAGEGAGSVSSSSRSSSRATSAGSSPSGSWAARGAGGRRLDGGSHSSPGSVAASPCGAGGRRREPALEGVLSKYTNLLQGWQNRYFMLDFESGMLQYFVNEQSKHQKPRGALSLAGAIVSLSDEAPHMLVVYSATGEVYKLRAADAKEKQCWVTQLQNCAKYHMETNSKSTPSSRSRSLTLLPHGTPNSASPSSQRHLAPAPPSVVTVTHHKSPAAARRSKSQYSGQLHDVREMMSQVEGQQKTLVQAIEALPGSGPLTALDQDLLLLKATSAATLSCLGECLSLLQQSLHQVGQYSHRTGPSESLGRRGPEAPAPDRLKNGALPLSGAHVAAEPSEVEADELISPTSSHYCSAYQVLPALTSSSLQRTAPSPPVIRKEPKIESTSETQLLNPEGLEGTSENSDPGPFIFKEADSLEGLSDEETTDTEDHGDDGESESSDHRSVILHLISQLRFGMDLTKVVFPTFILEKRSLLEMFANFMAHPDLLLSIGSGTTPEDRAISFVEYYLTSFHEGRKGSVAKKPYNPIIGETFLCSWDVPQDCIRPLQREKIRVEPEAEARAKAVVEAETKAKAEAEDLRVKSSEKRTSPHKDFHKPKLYKLRFVAEQVSHHPPVSCFYCECKEKGLFVNTHVWTKSKFMGMSVGVSLIGEGTLRLTDYGEDYVFTLPSAYARSILTIPWVELGGKVTMNCAKTGYSALVIFHTKPFYGGKVHR

>XP_002941862.1_oxysterolbinding_proteinrelated_protein_10_[Xenopus_tropicalis]
MEKAAQQQHSGGGSSNSSSRSSSRATSAGSSPSSAGRGLPVGCGSGGLPAGSGSGSGRALQQAQAVALAAGKVDGGAAQASKGGREHKQVIEGVLSKYTNLIQGWQNRYFILDFDSGILQYYVTEASKNQKPRGSLSLSGSVISLSEEAPNVIIVYSTNGEMYKLRAADAKERQFWMTQLQACAKFHSESKSAVSQRARSYSLLPHGTSNSPSPASQRQMTHSGPSIVTVTHHKSPAAARRSKNQNPAQLHEVKEVMAQVEGQQKNLVHAIESLSGSGPLSALDQDLLLLKATSAATLSCLGECLHLLQQSVYQSGQNNKNISTDSILSWHGPKSHSTENLKNGHLSSLPSSDTNLTWPIIPSMPQDYKVLERDTETGPPEAEEELTDTEDNEEEDLGVMDDQRSVILHLISQLKLGMDLTKVVLPTFILEKRSLLEMYANFMAHPDLFLSIAAGATPEERIICFVEYYLTAFHEGRKGAVAKKPYNPVLGETFHCSWDVPKENVKSFRTQSASKETVPPPSSSGEAYKLRFVAEQVSHHPPVSCFYCECKEKKMCVNAHVWTKSKFLGMSVGVSMVGEGILRLMEHGEEYVFTLPSAYARSILTVPWVELGGKVNISCAKTGYVATVIFHTKPFYGGKVHRVTAEVKHNPTNTMVCKAQGEWNGTLEFTYSTGETKLIDTTKLLNIKKKIRPLEKQGQCESRRVWENVTNALKSGNIEAASEQKHQLEERQRAESRQRASLNTTWKPKYFIKEGEGWAYVNPIWKNI

>XP_021323901.1_oxysterolbinding_proteinrelated_protein_10like_[Danio_rerio]
MDKPLCSDRRPVAAARAGSASLGFYAAPAGFIAPLQPGRARRIEGVLSKYTNLIQGWQNRYFVLDADVSQLQYFVSEQLRSLKPRGSLPLIGASVTVSDEAPHMFIISSANGEIFKLRAADATEKQLWMMQIQACTRRHSDSSAKMRKLKDCEDLLSVDRTQNSLDTQGSSGRTRSFSLLPHLPPSSSPSSQRNLPPHHLPHHGPSSNIVTITHHKSPAAARRAKDQYPERLLEVKEVMSQAEGQQKSLVQSIECLPTRGSVSCLDQDLLLLKATSAATLSCLGECLTILQQSTGHNNNSSSSALVAHNRDNVPVWTVPKSPSGERLRNGGAANLCSTEPSPTFRKKSLLQNTEDGMELISPDEEVLDSDDNTEEDLGVLEEERSVILHLLSQLKLGMDLTRVVLPTFILEKRSLLEMYANFMAHPDLFLSISAGVTAEERMVRFVEYYMTAFHEGRKGAVAKKPYNPVLGETFRCSWEVPQEKVRPLRTPGTGPKETANEEGVGAESECYRVHFVAEQVSHHPPVSAFYCECAERGMCVNTHVWTKSKFMGMSVGVSMVGEGVLYLRDHGEEYVFTFPSAFARSILTVPWVELGGKATISCAKSGYSASVTFHTKPFYGGKLHRVSAEVKQNSSGTVVCKAQGEWNGTLEFTYSSGETKVIDTTKLPVIRKRIRPVEKQSRRESRRLWQHVTEALKEGNVDLATEHKHLLEEDQRSEEKQRAADNMPWKPKYFSKEGDGWVYINPLWKTH

>NP_683761.2_oxysterolbinding_proteinrelated_protein_10_[Mus_musculus]
MERAAQSTDGGGGGGSNSSSRSSSRATSAGSSPSCSLAGRGVASRSGAAGLGGGGSRSSPGSVAASPSGGGGRRREPALEGVLSKYTNLLQGWQSRYFVLDFEAGLLQYFVNEQSKHQKPRGVLSLSGAIVSLSDEAPHMLVVYSANGEMYKLRAADSKEKQLWVTQLRACAKYHMEMSSKTTPGSRSRSLTLLPHGTPSSASPCSQRHLSTGAPGVVSVTRHKSPAAARRAKSQYSGQLHEVREMMNQVEGQQKNLVHAIESLPGSGPLTALDQDLLLLKATSAATLSCLGECLSLLQQSVRQAAPPSHKPGASETILGWHGPTSHSTDQLKNGTLGSLPSASANITWAILPNSAEEEHNSQPEPEPDSGPELVLSEEEQSDNEDKGEVEPGAMEDQRSVILHLISQLKLGMDLTKVVLPTFILEKRSLLEMYADFMAHPDLLLAITAGATPEERVISFVEYYLTAFHEGRKGTLAKKPYNPIIGETFHCSWEVPKDRVKSKWTSPHPPISAHEHPMADDPSKSYKLRFVAEQVSHHPPISCFYCECKEKRLCVNTHVWTKSKFMGMSVGVSMIGEGVLRLLDHGEEYVFTLPSAYARSILTVPWVELGGKVNISCAKTGYSATVTFHTKPFYGGKVHRVTAEVKHNPTNTIVCKAHGEWNGTLEFTYSNGETKVIDTTTLPVYPKKLRPLEKQGPMESRNLWQEVTHYLRLGDIDAATEQKRRLEERQRVEERKRETLRTPWRPKYFIPEGDGWVYFNPLWKTH

>NP_060254.2_ORP10_Homo_sapiens
MERAVQGTDGGGGSNSSSRSSSRATSAGSSPSCSLAGRGVSSRSAAAGLGGGGSRSSPGSVAASPSGGGGRRREPALEGVLSKYTNLLQGWQNRYFVLDFEAGILQYFVNEQSKHQKPRGVLSLSGAIVSLSDEAPHMLVVYSANGEMFKLRAADAKEKQFWVTQLRACAKYHMEMNSKSAPSSRSRSLTLLPHGTPNSASPCSQRHLSVGAPGVVTITHHKSPAAARRAKSQYSGQLHEVREMMNQVEGQQKNLVHAIESLPGSGPLTALDQDLLLLKATSAATLSCLGECLNLLQQSVHQAGQPSQKPGASENILGWHGSKSHSTEQLKNGTLGSLPSASANITWAILPNSAEDEQTSQPEPEPNSGSELVLSEDEKSDNEDKEETELGVMEDQRSIILHLISQLKLGMDLTKVVLPTFILEKRSLLEMYADFMAHPDLLLAITAGATPEERVICFVEYYLTAFHEGRKGALAKKPYNPIIGETFHCSWEVPKDRVKPKRTASRSPASCHEHPMADDPSKSYKLRFVAEQVSHHPPISCFYCECEEKRLCVNTHVWTKSKFMGMSVGVSMIGEGVLRLLEHGEEYVFTLPSAYARSILTIPWVELGGKVSINCAKTGYSATVIFHTKPFYGGKVHRVTAEVKHNPTNTIVCKAHGEWNGTLEFTYNNGETKVIDTTTLPVYPKKIRPLEKQGPMESRNLWREVTRYLRLGDIDAATEQKRHLEEKQRVEERKRENLRTPWKPKYFIQEGDGWVYFNPLWKAH

>XP_004939482.1_oxysterolbinding_proteinrelated_protein_10_[Gallus_gallus]
MEKAAANEGGGSNSSSRSSSRPTSAGSSPSSSSAGRGLPGRAAAAGRLDGGGGGGSSPGSAAASPGGAQAPGGVGRRRESVLEGTLSKYTNLLQGWQSRYFVLDFETGILQYFVNEQSKTQKPRGALSLAGAIISPSDEVPHMLVVYSASGEIFKLRAADAKEKQYWINQLRSCAKHHKEGNSKSISSSRSRSSSLLPPGTVNSPSGQKHMNQSGPTVVTITHHKSPAAARRAKSQRSGQLHEVREMMSQVEGQQKNLVQAIEALPSSGPLSALDQDLLLLKATSAATLSCLGECLTLLQQSMHQVGQNHNRTLSSDGILGWPGPKSHSSEQLKNGALSSLSSASANITWAIVPSAAQDGQTLQPGTEHSASELILVEDEATDTEDNEEEDLGVMEDQRSVILHLISQLKLGMDLTRVVLPTFILEKRSLLEMYANFMAHPDLFLSIAAGATPEERIICFVEYYLTAFHEGRKGAVAKKPYNPIIGETFHCSWDVPKDKVKPFRTSGASAISKDPAKESGQDQSTCYKLRFVAEQVSHHPPVSCFYCECKEKKMCVNAHVWTKSKFMGMSIGVSMVGEGVLYLLEHEEEYVFTLPSAYARSILTIPWVELGGKVNINCARTGYSATVTFHTKPFYGGKVHRVTAEVKHNPTNTIVCKAQGEWNGTLEFTYSNGETKVIDTSKLPVTKKKIRPIAKQGPLESRHLWQHVTNSLKEGNIDAATEHKHHLEERQRAEERQRAALTTPWKPKYFAKEGDGWQYLNPLWKSL

>XP_002665019.2_oxysterolbinding_proteinrelated_protein_10_isoform_X3_[Danio_rerio]
MNNSSPESVDSSEEITDTEDNEEEDLGVLDDQRSVILHLLSQLKLGMDLTRVVLPTFILEKRSLLEMYANFMAHPDVFLAITSGATPEERMIRFVEYYLTAFHEGRKGAVAKKPYNPILGESFHCTWDVPREKVRPLRTTSSSPAPAAAAAHSAQTSSNEGLGSYRLRFVAEQVSHHPPVSGFYCECKERRICVNTHVWTKSKFMGMSIGVSMVGEGVLHLLDHDEQYVFTLPSAFARSILTVPWVELGGKVSISCAKSGYSATVTFHTKPFYGGKVHRVTAEVKHNPSGTIVCKAQGEWNGTLEFTYNSGETKVIDTSKLPVIKKKIRPLDKQGQYESRRLWQQVTTALKAGDIDEATEHKHQLEERQRREGKQRSASSSSWKPKYFIKEGEGWVYHNPLWKTK

>XP_005158298.1_oxysterolbinding_proteinrelated_protein_10_isoform_X1_[Danio_rerio]
MEKIVNVSHSGGNKGKSADLGNPAQRQSRSGSYSPGSAAVSDTHPSQSQKRHLEGVLNKYTNLLQGWQNRYFVLDPELGQLQYFINEHSKVQKPRGSLPLIGSSVAPSDEFPFMFTVCAANGDFFKLRASDVREQQMWMTQLQLCARRHSDGNAKGCSSSSSSSTSSTGRTRSFSLHPHPVPQNSFISAQKQSPQHGTPASVISITHHRSPTGGQRACSRNPAGLHQVKEVMSQAEGQQKNLVNSIESLPSRGPLSSLDQDLLLLKATSAATLSCLGECLSLLQHNVCQAAQHITHGHPNTGENNSWSRPKTASEDQMKNGELMCNNTSARHQPHSPIHRSKERLKDKENSSPESVDSSEEITDTEDNEEEDLGVLDDQRSVILHLLSQLKLGMDLTRVVLPTFILEKRSLLEMYANFMAHPDVFLAITSGATPEERMIRFVEYYLTAFHEGRKGAVAKKPYNPILGESFHCTWDVPREKVRPLRTTSSSPAPAAAAAHSAQTSSNEGLGSYRLRFVAEQVSHHPPVSGFYCECKERRICVNTHVWTKSKFMGMSIGVSMVGEGVLHLLDHDEQYVFTLPSAFARSILTVPWVELGGKVSISCAKSGYSATVTFHTKPFYGGKVHRVTAEVKHNPSGTIVCKAQGEWNGTLEFTYNSGETKVIDTSKLPVIKKKIRPLDKQGQYESRRLWQQVTTALKAGDIDEATEHKHQLEERQRREGKQRSASSSSWKPKYFIKEGEGWVYHNPLWKTK

>XP_005158299.1_oxysterolbinding_proteinrelated_protein_10_isoform_X2_[Danio_rerio]
MEKIVNVSHSGGNKGKSADLGNPAQRQSRSGSYSPGSAAVSDTHPSQSQKRHLEGVLNKYTNLLQGWQNRYFVLDPELGQLQYFINEHSKVQKPRGSLPLIGSSVAPSDEFPFMFTVCAANGDFFKLRASDVREQQMWMTQLQLCARRHSDGNAKVMSQAEGQQKNLVNSIESLPSRGPLSSLDQDLLLLKATSAATLSCLGECLSLLQHNVCQAAQHITHGHPNTGENNSWSRPKTASEDQMKNGELMCNNTSARHQPHSPIHRSKERLKDKENSSPESVDSSEEITDTEDNEEEDLGVLDDQRSVILHLLSQLKLGMDLTRVVLPTFILEKRSLLEMYANFMAHPDVFLAITSGATPEERMIRFVEYYLTAFHEGRKGAVAKKPYNPILGESFHCTWDVPREKVRPLRTTSSSPAPAAAAAHSAQTSSNEGLGSYRLRFVAEQVSHHPPVSGFYCECKERRICVNTHVWTKSKFMGMSIGVSMVGEGVLHLLDHDEQYVFTLPSAFARSILTVPWVELGGKVSISCAKSGYSATVTFHTKPFYGGKVHRVTAEVKHNPSGTIVCKAQGEWNGTLEFTYNSGETKVIDTSKLPVIKKKIRPLDKQGQYESRRLWQQVTTALKAGDIDEATEHKHQLEERQRREGKQRSASSSSWKPKYFIKEGEGWVYHNPLWKTK

>XP_021322662.1_oxysterolbinding_proteinrelated_protein_10_isoform_X4_[Danio_rerio]
MDLTRVVLPTFILEKRSLLEMYANFMAHPDVFLAITSGATPEERMIRFVEYYLTAFHEGRKGAVAKKPYNPILGESFHCTWDVPREKVRPLRTTSSSPAPAAAAAHSAQTSSNEGLGSYRLRFVAEQVSHHPPVSGFYCECKERRICVNTHVWTKSKFMGMSIGVSMVGEGVLHLLDHDEQYVFTLPSAFARSILTVPWVELGGKVSISCAKSGYSATVTFHTKPFYGGKVHRVTAEVKHNPSGTIVCKAQGEWNGTLEFTYNSGETKVIDTSKLPVIKKKIRPLDKQGQYESRRLWQQVTTALKAGDIDEATEHKHQLEERQRREGKQRSASSSSWKPKYFIKEGEGWVYHNPLWKTK

>XP_689013.3_oxysterolbinding_proteinrelated_protein_11_[Danio_rerio]
MQTEAVLEHHSGSQSSGRTGSKSWQYSDLMEKVDGYLMKYTNLVTGWQYRYFVLNNEAGLLEYFVNEQSRNQKPRGSLPLGGAVISPSDEDSHTFTVNAISGEQYKLRASDAKERQHWVSRLQVCAQHHTEAMGKTNPPLQSRSLSMASQGSGSSPGSQHRISQNSNALLGLSQLQRGSSLYSSRKSLLPDHLLEAREMMTQAQGQHRDLIQSIEGLPSSQGPSPLDQDLLLLKATSLATMTCLSDCLHILQLQQVARQKFPLSGPALEWLEPKLPDILKNGGTLPSITKDDGKTEGAVLEPLEMDSCDIVLEQEEIDATQEVDDSSPSEEEDLGAVEEERSVILHLLSQLKLGMDLTRVVLPTFILEKRSLLEMYADFMSHPDLFVAITDGSSPMDRMVRFVEYYLTSFHEGRKGAIAKKPYNPIIGETFHCSWNVPKEAASPTGIPKEGSSCASDCYNVRFVAEQVSHHPPVSGFYAECQERQMCVNTHVWTKSKFMGMSIGVSMIGEGNLNLLEHGEEYTFSLPSAYARSILTVPWVELGGKVNVNCAKTGYSAVITFQTKPFYGGKLHRVNAEVKHNPTNAVVCRVQGEWNGVLEFAYTSGETRFVDVTKLPVTRKRVRPNELQGPYESRRLWQHVTESLKERDMDKATEHKRFLEERQRKEERHRAETQTPWRTKYFERKGEGWMYYQPLWKTAGQSSSSVPSPQNP

>NP_001025662.1_oxysterolbinding_proteinrelated_protein_11_[Xenopus_tropicalis]
MQGEVPTMKVSDSESRPDASPSPLTHRPSSRAAGGSKAWQYCDHMENISGYLMKYTNLVTGWQFRYFVLNNEAGLLEYFVNEQSRNQKPRGTVQLAGAVISPSDEDSHTFTVNAASGELYKLRATDAKERQHWVSRLQICTQHHTEAIGKNNPPLKSRSFSLASQGSGNSPGSQRRPSQNAASFFNLGHHRMVPANRRAQLLQPDHLGDVREMMSKAEGQQRDLMRSIEGLPSAGHLSSLDQDLLMLKATSMATLSCLNDCFQMLHQQHIALQRHIPPTGTAINWLEAKIQIPNHLNNGEESGLALPESQEQELLRETQALSDSTLASGEPEDINPEDEVEDGCDLKEDELGAVEEQRSVILHLLSQLKLGMDLTRVVLPTFILEKRSLLEMYADFLSHPDLFLSISAGLTPEERMVRFVEYYLTSFHEGRKGALAKKPYNPIIGETFHCSWRVPKDSLQLSNPTEKPPKAQDQAPLVEDSNKPDSYTIRFVAEQVSHHPPVSGFYAECPERRMCVNTHIWTKSKFMGMSIGVTMIGEGVLYLLEHGEEYTFTLPCAYARSILTVPWVELGGKVNVNCAKSGYSAAITFHTKPFYGGKLHRVTGEVKHNATNSVVCKVQGEWNSVLEFTYSSGETRSIDLTKLPVTRKLVRPVEKQGLFESRRLWENVTEALSAKDIERATEHKRALEERQRAEERLRAETETPWITKYFTKEGDGWSYKQPLWKSSDSGQ

>XP_015145442.1_oxysterolbinding_proteinrelated_protein_11_isoform_X1_[Gallus_gallus]
MQCADPAAAVKGPEGEGKAEPAAAGKSGGRGAKGWQYSDHMENICGYLMKYTNLVTGWQYRFFVLNNDAGLLEYFVNEQSRHLKPRGTLQLAGAVISPSDEDSHTFTVNAASGEQYKLRATDAKERQHWVSRLQICTQHHTEAIGKNNPPLKSRSFSLASQGSINSPGLQRRPSQNAVSFFNVGHHRLPAGKRGPILQPDHLVDVREMMSQAEGQQRDLIRSIECLPVSGHLTSLDQDLLMLKATSMATMNCLNDCFHILQLQHASQQKGSLPAGTTISWLEPKISLSNHFKNGAAQNFPAEINKPASVREEQSNAEPCQLTREPEEINPDEELEDLCDDKEDDLGGVEEQRSVILHLLSQLKLGMDLTRVVLPTFILEKRSLLEMYADFMSHPDLFIAITNGATPEERMIRFVEYYLTSFHEGRKGAIAKKPYNPIIGETFHCSWRMPKSEVATDGGSNISAHSEQIALSKDLEGQAESDYYTVKFVAEQVSHHPPVSGFYAECVERKMCVNAHVWTKSKFLGMSIGVTMVGEGLLSLLEHEEEYTFSLPCAYARSILTVPWVELGGKVNINCAKTGYSASINFHTKPFYGGKLHRVTGEVKQNATNTVVCRVQGEWNSVLEFTYSNGETKYVDLTKLSVTRKRVRPIEKQGPFESRRLWQHVTESLRDGDIDKATEHKRALEERQRNEERLRAETETPWCTKYFIKEGDGWVYHKPLWRAVSAVQTQQMDAN

>XP_001373309.2_PREDICTED:_oxysterolbinding_proteinrelated_protein_11_[Monodelphis_domestica]
MQAGEQGPAMKVSESEGKLESLGSAATLNNKNSSNSSGGGSGSSGGGGGGGGGGAISSSNSSRSSSAKGWQYSDHMENVCGYLMKYTNLVTGWQYRFFVLNNEAGLLEYFVNEQSRNQKPRGTLHLAGAVISPSDEDSHTFTVNAASGEQYKLRATDAKERQHWVSRLQICTQHHTEAIGKNNPPLKSRSFSLASQGSGNSPGSQRRPSQNAISLFNVGHSKLQSVGKRTQLQPDHLVEVREMMSHAEGHQRDLIRRIECLPTSGHLTSLDQDLLMLKATSMATLNCLSDCFHILQLQHASHQKGSLPSGATIEWLEPKLPLPNHYKNGSDQTFVPEQNKPVAVQEESSISESGLLTKEPEAINADDEVEDTCDNKEDDLGAVEEQRSVILHLLSQLKLGMDLTRVVLPTFILEKRSLLEMYADFMSHPDLFISITNGTTAEDRMVRFVEYYLTSFHEGRKGAIAKKPYNPIIGETFHCSWRMPKSDVASSMTTSSSSQAISDQASLPEPLNQVESDCYTVRFVAEQVSHHPPVSGFYAECAERKMCVNAHVWTKSKFLGMSIGVTMVGEGILSLLEHGEEYTFSLPCAYARSILTVPWVELGGKVNVNCAKTGYSASITFHTKPFYGGKLHRVTAEVKHNTSNTVVCRVQGEWNSVLEFTYSNGETKYVDLTKLSVTKKRVRPLEKQGPFESRRLWKNVTESLRDSEIDKATEHKRALEERQRSEERHRAETGTAWQTKYFIKEGEGWVYYDPLWKTIPVTQPAE

>NP_789810.2_oxysterolbinding_proteinrelated_protein_11_[Mus_musculus]
MNFGVKMQGGEPASVMKVSESEGKLEGLATAVTPNKNSGNSSCGGAISSSSSNSSRGGSAKGWQYSDHMESVNGYLMKYTNLVTGWQYRFFVLNNEAGLLEYFVNEQSRNQKPRGTLQLAGAVISPSDEDSHTFTVNAASGEQYKLRATDAKERQHWVSRLQICTQHHTEAIGKNNPPLKSRSFSLASSGNSPISQRRPSQNAMSFFNVGHSKLQSVNKRAHLHPDHLVEVREMMSHAEGQQRDLIRRIECLPASGLLSSLDQDLLMLKATSMATMNCLNDCFHILQLQHASHQKGALPSGTTIEWLEPKIPLSNHYKNGAEQPFATEPNKPMGAPEAQCVAESGVLAREPEDINADDEVEDTCDNKEDDLGAVEEQRSVILHLLSQLKLGMDLTRVVLPTFILEKRSLLEMYADFMSHPDLFIGITNGATPEDRMIRFVEYYLTSFHEGRKGAIAKKPYNPIIGETFHCSWRMPKSEVASGVSSSSSTPAITDHAPLPEEAPTQSVSDCYTVRFVAEQVSHHPPVSGFYAECAERKMCVNAHVWTKSKFLGMSIGVTMVGEGVLCLLEHGEEYTFSLPCAYARSILTVPWVELGGKVSVNCAKTGYSASITFHTKPFYGGKLHRVTAEVKYNLTNTVVCRVQGEWNSVLEFTYSNGETKFVDLAKLAVTKKRVRPLEKQDPFESRRLWKNVTDSLRESEIDKATEHKRSLEERQRTEERLRTETGTPWKTKYFIKEGDGWVYHKPLWKGIPSQPAE

>NP_073613.2_ORP11_Homo_sapiens
MQGGEPVSTMKVSESEGKLEGQATAVTPNKNSSCGGGISSSSSSRGGSAKGWQYSDHMENVYGYLMKYTNLVTGWQYRFFVLNNEAGLLEYFVNEQSRNQKPRGTLQLAGAVISPSDEDSHTFTVNAASGEQYKLRATDAKERQHWVSRLQICTQHHTEAIGKNNPPLKSRSFSLASSSNSPISQRRPSQNAISFFNVGHSKLQSLSKRTNLPPDHLVEVREMMSHAEGQQRDLIRRIECLPTSGHLSSLDQDLLMLKATSMATMNCLNDCFHILQLQHASHQKGSLPSGTTIEWLEPKISLSNHYKNGADQPFATDQSKPVAVPEEQPVAESGLLAREPEEINADDEIEDTCDHKEDDLGAVEEQRSVILHLLSQLKLGMDLTRVVLPTFILEKRSLLEMYADFMSHPDLFIAITNGATAEDRMIRFVEYYLTSFHEGRKGAIAKKPYNPIIGETFHCSWKMPKSEVASSVFSSSSTQGVTNHAPLSGESLTQVGSDCYTVRFVAEQVSHHPPVSGFYAECTERKMCVNAHVWTKSKFLGMSIGVTMVGEGILSLLEHGEEYTFSLPCAYARSILTVPWVELGGKVSVNCAKTGYSASITFHTKPFYGGKLHRVTAEVKHNITNTVVCRVQGEWNSVLEFTYSNGETKYVDLTKLAVTKKRVRPLEKQDPFESRRLWKNVTDSLRESEIDKATEHKHTLEERQRTEERHRTETGTPWKTKYFIKEGDGWVYHKPLWKIIPTTQPAE

>NP_011863.1_oxysterolbinding_protein_related_protein_OSH7_[Saccharomyces_cerevisiae_S288C]
MALNKLKNIPSLTNSSHSSINGIASNAANSKPSGADTDDIDENDESGQSILLNIISQLKPGCDLSRITLPTFILEKKSMLERITNQLQFPDVLLEAHSNKDGLQRFVKVVAWYLAGWHIGPRAVKKPLNPILGEHFTAYWDLPNKQQAFYIAEQTSHHPPESAYFYMIPESNIRVDGVVVPKSKFLGNSSAAMMEGLTVLQFLDIKDANGKPEKYTLSQPNVYARGILFGKMRIELGDHMVIMGPKYQVDIEFKTKGFISGTYDAIEGTIKDYDGKEYYQISGKWNDIMYIKDLREKSSKKTVLFDTHQHFPLAPKVRPLEEQGEYESRRLWKKVTDALAVRDHEVATEEKFQIENRQRELAKKRAEDGVEFHSKLFRRAEPGEDLDYYIYKHIPEGTDKHEEQIRSILETAPILPGQTFTEKFSIPAYKKHGIQKN

>NP_012928.1_oxysterolbinding_protein_OSH6_[Saccharomyces_cerevisiae_S288C]
MGSKKLTVGSDSHRLSKSSFSSNKSSHSATKDQPIDTDDIDEDDESGHNIILNIISQLRPGCDLTRITLPTFILEKKSMLERVTNQLQFPEFLLQAHSEKDPLKRFLYVMKWYLAGWHIAPKAVKKPLNPVLGEYFTAYWDLPNKQQAYYISEQTSHHPPECAYFYMIPESSIRVDGVVIPKSRFLGNSSAAMMDGSTVLQFLDIKDGNGKPEKYVLTQPNVYVRGILFGKMRIELGDHMIIKSPNFQADIEFKTKGYVFGTYDAIEGTVKDYDGNAYYEISGKWNDVMYLKDLKQPRSSPKVFLDTHKESPLRPKVRPLSEQGEYESRKLWKKVTDALAVRNHPVATEEKFQIEDHQRQLAKKRIEDGVEFHPKLFRRSKPGEDLDYCIYKNIPVDEDPEKQIRSILQIAPILPGQQFTDKFFIPAFEKIKSQKKMIENEKQNPAKQ

>XP_964411.2_oxysterolbinding_protein_[Neurospora_crassa_OR74A]
MMGLVTGRRRATSTASSKSSGDANQDVAEDDTLVVEPDQGNVLSHIISQLRPGADLSRVVLPTFILEPRSMLERITNFMCHPEMLLPIPEIDDPVQRFVAVVKFYLSGWHIRPPGVKKPLNPVLGEIFTCYWDFPDKTRGYYISEQTSHHPPKSSYFYMVPGHNIRVDGTLKPRSKFLGNSAASMMEGIAILSLLNRGKDPQRGERYILTQPNMYARGILFGKMKYELGDHSYVRCPELDLVADVEFKTKGWVSGTYNAIGGTIRRESTGEILYELSGLWSEEMYLRDVKTGHKEMFFNALHAKSSPPIARPIEEQEERESQKIWAATAKAVKERNHELATIEKTKIEDQQREEAAKRINDGVEWHPRLFRMVRGGPGGSEEGEEDLEWIINATIDGDTPEKQAEQIMAIYPILKGQRFVEKNTIPPRTPVASPSKEAHPPVPTIDHEKLDHEEAAAGSEPVDTAPKVHPPLEPSHESTTEIQKLLVATGAVAKEGPLINFHEDMAKDLPPIKKVDTDDSHDEFVDAQN

>NP_588124.2_putative_oxysterol_binding_protein_[Schizosaccharomyces_pombe]
MPHEKQDRDAEEIEDEGKNIILGIVSQLRPNMDLSKVTFPTFVLEPKSMLERITNFMSHPDLLLNVQKTADPEMRFLDVVRFYMSGWHIRPRGVKKPLNPILGETFTGFWKFPPSNSKDPNLQKLHGIAVYAAEQVCHHPPISAYFYLCPEYKVRIDGVVKPRSRFLGNSAASIMEGIASIKLQDLDEEYLITQPNVYARGILFGKMRLELGDHVTVRCPKTDLQADIEFKVKGFISGTYNSIAGKVKRVSTGEVLYKISGKWDSEMSVESVKTGETRPLLDVSKHDVYLVSARPLEEQGERESQRLWYKTCQAVIARDQTTATETKSAIEDRQREEAKQREIENVQWKPKYFKMIAPEEYILNFDIPNGKSDLEVLCALDEFIPIFSEVDRIAFHKFLSENTKPEDSSIHKHSRDASGDSTKGFAEHMPAPARRRRPQSTASFVTYRSDNGSVDEYHDAQLPDPNTLSKLHEEQDPAL

>KXN66184.1_Oxysterolbinding_protein_[Conidiobolus_coronatus_NRRL_28638]
MTNKTKDEVEGEEVLEASAKNILLNVIGQLGKGADLHRVTLPTFVLEPRSFLERLTDFMSHPELIINASKLPTPEERIIAITKYFLSGWHIRPKGVRKPYNPVLGEYFRCQWEFENGTKCYFLAEQVSHHPPISAFVFASPENNFIIQGDMRPKSKFYGTSAGSLLEGNCKFTFLNLPGEEYTITYPNLYAYGILFGKLTMDMGDISTITCKQTNLCSKMEFKTKGVFSGAYHQVSGKVKKSSTNDTLYEFNGNWTEKVTISSKNGPEEIFLDIDNMKLHPRTVKPISEMGEFESIRLWQHLTSNLTANNMDQATEEKTKIEEAQRVRTKSRESKGEDWEHRFFTKANDTYTWKLDS

>PIA15119.1_Oxysterolbinding_protein_[Coemansia_reversa_NRRL_1564]
MSKNGECSAVEEELDAEPKSVILSMIGQLRKDMDLSRVTFPTFVLEPRSFTERVTDFMSHPDFLISSSKCEDPVERFIGVVKYYMSGWHIRPKGVKKPYNPVLGEFFRSKYEFDDGSSAFFVAEQVSHHPPITAMFYNSPEHRIAIEGDLRPKSRFFGNSVGMLLEGYAMIHFLNRSEQYLVTYPNMYARGILFGKMVLELGEVSTVTCKESDLMFEVEFKTKGILWGSYNQISGKIRRISTREVLFDIEGNWQTVMYITDKRNPQSSPKVLFDASTERVVPQTVACTGEQEPNESRNFWKDVTKAICDEDLNAATTYKSAIEEQQRLNAKDRENRKEHYVPRFFQLEIDGHYHPKMLLNELSEDSEEAKEKICKWIFTRPDGEMQNFKRLEDDPVVLATPTKNRRKS

>XP_012049842.1_oxysterolbinding_protein_[Cryptococcus_neoformans_var._grubii_H99]
MGLLSQKMDSLAIKGRTSRRSSVVSPTGTPTRDGETQIDDGDPNDTSTLDQEEGNILMSIISQLRPGMDLSKIALPTFVLEPRSLLERITDFFSHPELIFGVGNDPDAKERYIRVMTFYLSGWHIKPKGVKKPYNPVLGEFFRCSYVYPDGSEGFYIAEQVSHHPPVSAFFYVSPKNGLLVTGELKPKSKFLGNSAATIMEGEDRIRLLDRPEDGEYSITMPNTYARGILFGKMLLELCDVSSIVNAKNDFHCDVDFKAKGWISGGYNVISGKVVGPGKSDIGEISGHWSSAIEFKDKETKEKKVLFDPSNSRVAPKKVLPESEQEEYESRRLWTKLTDAIRAADMHGATAAKSAVEDRQRELARRRESAGEPAHEQRFFKHVAGDKWMPKLDVDNLPKDRNEMEDVVRKWIFGDKNPLNYESAKTTPRGSQSIESGPAPAAGGEATPVAAGGAAAGGAAGAAGVAGADVRSSNASVTESTRSASTEPPAVPTAPGPPVGQPVDHPVPPKA

>XP_011391824.1_hypothetical_protein_UMAG_05498_[Ustilago_maydis_521]
MGLLDHVSGAVSGAKSHIKPSKEDRPPEGASADDTEELDEEAGNILMSLIGQLRIGMDLSKVTLPTFVLEPRSMLERITDFMSHPDLIFGAGKIDSPEERFLHITRYYLSGWHIKPKGVKKPYNPILGEFFRCTYNYNDGTKGYYIAEQVSHHPPISAYYYVSPENNLLIYGELKPKSKFLGNSAATIMGGENRAVLLDRQDDGEYQISMPNMYARGILFGRMVLELGDTSKIRNEANDLSCDIEFKTKGYFTGTYNAIGGKVTKGSKTVGEISGKWNESMDYKESSSGKQQELFDARKATIVQKEVIPEDQQEENESRRLWSKVTEGIKEKNLDKATENKSSIEEKQRALAKEREESGATWEPRFFVQKGEKYYPKIDALPSEEYRPQVVVEYFSKFT

>ORZ39657.1_hypothetical_protein_BCR44DRAFT_55878_[Catenaria_anguillulae_PL171]
MAPPASPSEKSSERGSVRSARSGSNSDPSSPEDYTAVDDTQKEVLDDEPRSILMGIVSQLSKGTDLHRVTLPTFVLEPRSMLERITDFMCHPDLIMQTHKKDDPVQRFVDVVRYFVSGWHIRPKGVKKPYNPVLGEFFRCSYTYEDGTAAFYVAEQTSHHPPISNYFFCSPENHLVIEGEVKPKSRFLGNSACTMMTGDTIIQFTNRPGEEYVLNLPNVYARGILFGTMILELGDSVQIKCEKTDLVCDLEFKVKGYFTGTYNAIGGKIRRISKPKEVLYELSGKWSDASFIKTPKSDNDVLFDANEEHIFPKTVPADDQQEPYESRRVWSKVTVAIGDNDMDTATEEKNKIELRQREKRIEREEKGEEWSPRFFKLIGEGEDPECFEFKLIHELAADPKERRKQLEDFILKSPPPHPYGTEAAS

>EPZ35334.1_Oxysterolbinding_protein_domaincontaining_protein_[Rozella_allomycis_CSF55]
MSSGKENDTASESFKSIDEVLDDEPKSILLGIISQLSKGMDLHRVTLPVFILEPRSMLERITDFMSHPEFLLNTSVEQDPIQRFIQVVRYFLSGWHIRPKSNAHIFSKGVKKPYNPVLGEIFRCKYKLEDGSSAFYLAEQCSHHPPVSTYFYANPDRNLVITGNVKPKSKFLGNSAASLMNGESYIYFGNIPNEVYVITMPNMYARGILFGTMSMELGDNATIKCEATGLCCEIEFKTKGFFSGSHNAIQGKIKNKEGKVIYQISGKWTDVIYLHKMEGKTEISKEIFFSSAESRIQPKIVQDEEKQSENESRRLWSKVTSSLLRKDYDAATNEKTLIENVQREQRKLREAEDVEYQPHFFHPVGDNNFQFNHYHPERDNIANMKQKLLEIIFPSHPDACCLSYKNSCCPFGEISRTMQRRRRFEDQPVEETKSRKRKNKFILEKSTLFDKYPTILPTNLTKSQLEAYCFFYRMEEIQHKLRTRELPHIRARSPSPEPVFDEHGRRINTREARQRQKLETERRKLVDDAVRNHPEFNQDRKGVRYYIFCPLNSSDRIYIPAKDYPEINFIGLLIGPRGTTLKDMENASGAKLSIRGKGSHKEGKVRPEDDDDDDLHCYITADTEDKVAKAAKMVLRIISSSASVGDTELKKIQLRKLAIINGGAREAENDIVCSNCGMAGHRRFECPERSTVAGNVACRICGSVGHLSKDCVHRNDPQYIQKSQQIDREYASFLNELGTKEEEKQVINISQNQTSQAPWHQMSQPIQWDPTLMPYGGDDAIGSYDPNSYYADYHAVAWNIQQQAAAAQWANQGY

>XP_006678791.1_uncharacterized_protein_BATDEDRAFT_88099_[Batrachochytrium_dendrobatidis_JAM81]
MSSNISKGDRSGSALDIVANADATNGSDQETEVLDEEPRSILMGVIAQLSKGMDLHRVTLPTFVLEPRSMCERISDFLAHQTIILSTSKKDDPIERFIDVLSYFFSGWHIRPKGVKKPFNPVLGEIFRCHWSFQDATESFFVCEQVLHHPPVSAYFFSSPENDVTITGELKPRARFLGNSAATIMEGGSTVTFPSRPGESYDITSPNVYARGILFGTMYIELGDTAIVRCAKTDLICNIEFKTKGYFGGCERNAIAGKIKRESTGEILYKVSGCWSEQIWLQSTKSGDKRMIFDAISSALVPKQVADILDQEEFESRRLWQHVAKAVTDRDLDMATLEKSKIEDNQRLVVKDREATSQVWEPRFFSPDGENWKPKFMEHIPTEAGLAKEWLRETIFSKATTDMHVHFWSNK

>XP_016610728.1_hypothetical_protein_SPPG_01775_[Spizellomyces_punctatus_DAOM_BR117]
MMGDSEENVAVGSDVEQEVLEDEPKSILLGIIGQLRKGMDLSRVTLPTFVLEPRSMCERITDFMSHPELILNTPQKMDPTDRFLDVVTYFLSGWHIKPKGVKKPYNPVLGEIFRCRWKFDDDSESFYVCEQVSHHPPISAYFYANPQKDVWILGDIRPKSKFLGNSAATIMQGTSTITFPKRWPGEEYMVTLPNIYARGILFGTMYLELGDTVTIKCPKNDLIAEIEFQTKGFFTGTYNGIKGKVKRESSGEVLYTLGGKWTDVMYLSKGTTSDKIPIFDAHSAKIYPKVVAAEAEQEEFESRRLWSKVTKGLVTKNLDYATTEKSAIEDNQRTIVKDRATKNITWEPRFFRRNGDMWEFRSSDLPTDPLEANKALEGIIFGSATNPMHARFWVRPDQINGVE

>XP_025168879.1_hypothetical_protein_GLOIN_2v1699580_[Rhizophagus_irregularis_DAOM_181602=DAOM_197198]
MADDENSNDTEVLDEEPRSILLGLISQLRKGMDLHRVTLPTFVLEPRSMLERITDFMSHPELIFVPKEEDPVNRFVNVVRYYLSGWHIKPKGVKKPYNPVLGERFRARWQFADNTEALFVSEQVSHHPPISAYYYVSPENNIIIVGDIRPKSKFLGNSAATLMQGESKIIFTNRPGEVYRIAMPNVYARGILFGRMVLELGDNSTVRCEKNDLICELEFRTKGFFTGAYNSIYGKIKRESTGESLYEITGKWSDIMYIKDLRTGHKEVLFNVHESKIYPKIVAPEEEQEENESRRLWSKVTSALIGRNLDLATEEKTLIEDKQRNEAKLREAEGIDWRPRYFFCENDEYNFKLTHISKDPQTAKNQIESFIFSSNSPPGFHSPNGPHHHNHDD

>XP_655624.1_Oxysterol_binding_protein,_putative_[Entamoeba_histolytica_HM1:IMSS]
MSTATTSNPETERIMKKFSKYGEINEISQQYEPTPYKKVEAEPVAKDLWNNNIIWEFAKGLSPGVDLTRIPFPVCITQARSFLQNFTDYFEHWNYLSLAANEDDPYKRAKLVAQWYLSGFAHAMKVVRKPYNPILGEVFRCMWEDPKSKSKTHYIAEQVSHHPPISAFYVSNREDGWIGSGTITFSVSFYGVSAWAYLNGVQKIKLLKYDEEYTWAFPPTKASGFFVGPFIMEMGGVVEIRCNKNPYWASLDFKTTSMFSSANLYKVEGKIMNGSKQVDTIQGQYFEKITLNNKETFFDAKNPPESPIRYEVPFENLWGKESQYVWQDLTKAVIKGDGQEAADKKYEVEEWQRQERIQDQKQGKTYVPKFFEKVNDTTYKYLFYNEAPFQKGEEEAYEMAGMIMSRRKQL

>XP_653552.1_Oxysterol_binding_protein,_putative_[Entamoeba_histolytica_HM1:IMSS]
MTTPIRIDSDAIKQLHGTVYVQQEEKTQEFVDAMEKGDGKSIIWEILKQLRPGMSLERITMPTHVMEPRSLLEKLTDYFTHLDLVNAAANAPTAEERMVKLVQFFLSGFYITPKACKKPYNPLLGEFYRTSWSHADGSKTFFIAEQTSHHPPVSSIYACNRQAGWVGTGSLDFVTTFNGLSASAGIQGLIKAKFTKFDEDYEWNFPMALVTGIYIPPLTMEIGGVLNFVCKQSGYKAKVEFKTMSMFSSSNYRQINGIISDPEGKPIYEINGRYDEELFITDKRTKEKKSFFKVEELKKTKEQRLVREFDKLHPFESEKLFKRVSDAIIKNDQNLAMEEKFVLEEAQRTQRKLNDEKKVEQERRLFDKQGSDHDWKYKWENWNKYDPETEGEELEIGGKIVTLKKNEVLNEERIKEILSDIPYPDWKEGEEPPHMLESFKFLLDRYKKVEDNKDKEEENKEDNKETEEKKEEAPINENDSLCPKAVVAKA

>XP_656568.1_oxysterol_binding_protein,_putative_[Entamoeba_histolytica_HM1:IMSS]
MSLQYQHPYLSFMALDPSIKKKMPLTQIVAIHDDLISRSTIRGTLLLRNVNICECSIHVRESKMPGFCFKIEALKKTLCYKHGLNGETLSKHNDLFLVFRNENVIKGKEWFTQIENAISLAITKYKTQPTSTVREQFDSSSKIKPSLPPKTFEMIKSTPYINVHSYNEEDIKKVKPLSPSSSLSQINALKTKQIEQIQPVPEIKDTKKQKKEETLKEEKGVINNSLQQSLSHYVLAQNDLKEFFDATEEGKSIIWELLKQVRPGMDLSRITFPSHILEPRSFLVKTTDYFAHIQYFKPISEEPDPGLRMLGLVKWLLSGFYLMPTGIKKPYNPILGETFRTMWKHEDGSRSYLLGEQVSHHPPVSAFYATNRQQGWMGNGYIDFTTKFNGLSASIILGGKIDIYLLNFNEHYTMTFPEALASGFFVGPMLMEIAGKSVFECKETGYKAEVIFNLRGTFSSDKYQTVDAKITKNGEEVYKIWGNYYKELFYCGKDKVKKSLLKIDDIRGKSVPRYTIDMNQQGKMESDKLWIKVTNAIYKGDQITATEEKCILEEAQREEVRKHESEGTVHIPKYFVKDSFLGWKYVDFNNSKFNPDKELGDYEDEYHIKPLLKEQNDCIGDGKQVKEELLTSSNETNNSETLKTDHQSSMNTQNSGDEKCKKVDELKEELNQVEARIKNITFTQNQKTIDIIKQLKKFIVILLSINIVLIALVLKLLLK

>XP_645109.1_oxysterol_binding_family_protein,_member_4_[Dictyostelium_discoideum_AX4]
MEIGTSSTTNNIGVAPTIPQDIVNNNNHNNNSSNNSSNNNSISSSPTDSSQLMNGEQSTSPPSPPIEEVLEEEPRNLLISLLSELKIGVDLSRVPLPTFILEPRSLLEKFTDNMIHGEILCNLSKLESPMDRMHLITKWYLSAFHYRKKGLQKPYNPILGEIFRTRWEFKETNSNCIMVAEQISHHPPVSCIYLSNRKDGYTMTGTINPRSKFLGNSMAVIVDGSSTLTLLGLQEEYVITFPTAVARGIIFGTLLTEIVGNSTISCKQTNIKVEMDFKAKPMFGGEYNVVCGKIKKGNETTHTFNGKWDKKVEITLSSSSSSSKKKNGSTNDILWDCNDAVKTQMITRQISEQEEFESQRLWQKVSHAIIKKNQKDATFEKNKLEDEQRKRVKDRKENNIEWEPRLFKKVNDQWIYKYQNHTLYDQNEPKEIETDGIIHFEGTLIKKESKQNLVEKCGASENEIIV

>PPA1317108
MDPLEQPTGAGGDAEEIKSEDAEVLEEEPRNLLISLLSEIKIGMDLSRVPLPTFILEPRSLLEKFCDFMIHCDQLSGVAKLDDPVERLYQITRWYLTGFVYKPKGVKKPYNPILGEIFRSKWQYSGTTAHLIAEQISHHPPVSCIYISNRKDGYAMTGIIGPRSKLMRASLAVLVEGSITLHLLERNEEYTFNFPNIFARGILFGTLLTEIAGNTTISCKQTNLRADMDFKAKPFFGGEYNTVSGKIKRKDEVLYSFSGKWDNRIDITNTKKKTTEVFWDCKTAKKTPRIIRPISTQEANESQRLWTHVSQAIIKKDQKEATNEKIKLENEQRNGVKDRKEKGVEWEPKYFKKIGDKWVYKYANEWTQRLKSNHLFPIYINNSNNNNNI

>XP_002678864.1_predicted_protein_[Naegleria_gruberi_strain_NEGM]
MFKGQSEDDIEILNENTKSMLMQFMGQLKIGMDLTKIPIPCDFLEPRSLLEKLTDFNTHAHLLTTAMDDDDPIQRMVHLVRWYLSGWHVKPKGVKKPYNPVLGEVFRCNYELRENGLMTCIGEQVSHHPPKSAIYAECKQKELLLEGWYYPRSKFLGNSAASITEGNIKITFGSRGNEVYTATWPSVYARGVIFGKLIMEMAGKTKIECKKTNMLAEIEFKSKPFFGGEYNVVSAKIKHKKKTIYQIRGKWNEKLYIKGKDSDKNSEELFFDVRSAEVVPKHVPPMEVQKDNESRKLWDNLTKAIKQNDVQLAAIEKDKVETEQRNVKKEREQQGQVFTPKLFKAGPEDFWTFVGFE

>XP_004334564.1_oxysterolbinding_proteinlike_protein_8_isoform_b,_putative_[Acanthamoeba_castellanii_str._Neff]
MDGKDGRKKDKKHKKKDKKDKEIEEAMDQGGEEQQQIEGTETEVRIGMDLSRVTLPTFILEPKSFLEKLTDFFTHPDVMLSSVECQSPVERLVAITRWYLSGFYIRPKGVKKPYNPILGEIFRAQWDHGTSKSFYVSEQVSHHPPVSAFYASNRAVGLAINGYINFRSKFMGNSSAAIMDGEAVLYFLRIPGESYTITFPTAYARGILWGTLLMEMGGTVYITCEKTGLQSEIEFKTKPYFGGGYNYVAGKIKETSGKKKTLYTISGKWDEEIFIKPADTKKDELLWDPKNAPPKVTMDIRPLDKQDECESRRLWQHVSAALRKNDQETATTEKCKIEDAQREAVRRREEEKETYEVKYFEKDENGGWVYKWKNLEPFPLDELDQWEEYEEDCVIGARKK

>XP_005831679.1_hypothetical_protein_GUITHDRAFT_163527_[Guillardia_theta_CCMP2712]
MSSIDGEADVVAGEEPEYEEKLDEQPKSILMAMIRQLKTGMDLSRVTLPTFILEPRSFLEKCSDFMAHGRLIQDIATTSDPLERFLTVTRWYLCGWHFKPPGVKKPYNPILGEVFHCKWDYGDGGTTYYLAEQVSHHPPISAFHFVNRKAGWILNAAINPKSKFLGNSAASIMDGQASLHILALGETYTFNFPSYYVRGLLIGVMRMEIAGDVQISCKETGFQWTASFTNRGYFKGENNSVSGKVTRIGSKDTICKIDGRWDRVIKITDKKTGASNVFLDVEAEKQKSFMPLNVDPEDKQKYYESRRVWSQVTRGLKTQNLDFATEHKTKLEDGQRAGKKERDERGQAWQTKLFEKVVPNDPLSWRCKICKFTAYNPNDPEEEKFGAQLKALADSGELAVGTELMATLKGSSS

>XP_013754003.1_oxysterolbinding_protein_[Thecamonas_trahens_ATCC_50062]
MERGKMSHGESRVEGTVKLRGMFKQWTTRYAVLVGSTLSIFKDATKAEWGKAEAAIALAGKCTVTKRQTKKGGFCFKVKERSGKSIMHGAAGYKVDNAIFRVPTLAMLDAWLVAIRAAINGESFQSQIIVSGNTLASRAAEDGHSHSDDGGVAGASAGPSGSKVRRRRQVRVRRRRGEKKADSGELPVIGTRYEDEEADSESIDLGGDEIQGENKGLVKTLLKQVRPGMDLSKVVLPTFILEPRSFLEKMTDFFAHNDLLAAVTTFDTPEARMLQLTRWYLSGFYLGPKGVKKPYNPILGETFRCAWDLAPTEALPFPSRTHFYAEQVSHHPPISAFYVANRKAGFVVNTAIRFKSRFNITHVLAIMYGRGVITLTNRDEQYVLNYPKAKASGWFTTLKSEITDKVTIACEKTGYVTELKFKAKPMVGGTYNAITGRIYKRMPSGGEEVCYTISGKWNERIDYTDVRTGGTYEMWDTEGKRAALVPYKRPAYDEQLPTESVKLWAKVTQAIIEQDQVAATEEKYVLEQKQREDKIARDAAGEEWQLINFVQNDPDVTLPDFTYKHLNTAPFDWDNEVMEVEENGIIRSVTKNELDRLTGSGARSGSDRGSDSGWSSDLDRGAGSSDYTYDYTDESYTASDDDGELYPLRASEYGTLTARVRDTRKAHEAIAAQVATLLGDVADIRADLKARDKADRKARRELNSIKSAISSLKSDTEPDGWFSLTFLFKLFLVFWLLYISWHEFPSASSFVPSLPSFLGGDSS

>XP_002117617.1_hypothetical_protein_TRIADDRAFT_32809,_partial_[Trichoplax_adhaerens]
AMKMNYKLIKKKVHEESYSSLTDPSAVITQSWLKIRGSLKTWAKYWCVLKPGVLLIYKHQKHEQWIGTVLLNTCDVIERPSKKEGFCFKVYHPLDESIWATRGPKGELSGSIAQPMPRDHLIIRAATEETGRCWMDYIEVSIKSRNPHPHVDVKDDAADTPTREDVNANEPKEDFAIKYLTANNRGKANNSCQIYKQMTNFIGVDGELVESMEDENKNLLWAILKQVRPGMDLSRVVLPTFILEPRSLLQKLADYYFHADILSRAAKEESPVVRIKEIVRWYLSGFYKKPKGLKKPYNPLLGEIYRCQWNHPETDSVTYYVSEQVSHHPPISAFFMANRKDGFCLNASILTRSKFYGNSTQAILDGSATLMLLDQGEEYIITLPYANCKGILVGTMTMELGGDISITCKKTGYTAEISFKLKSFWAKKDATNLISGKIKHGKEVLFTLDGHWDGEIYITDKVTDERSLFWNPTPEVKKSRLKVNVVEYESQDDNESEKLWSKVTEAINKSDQEAATIEKSKLEDRQRKDAKERKDCGTEWQPKLFSCVNEDENRYVYRYIDMRPWDPSNDLMQYEWNGEIKTQRRHRNPVVKNLVKRESSLTKNASRKVVRMNSHRKQVDSSSDESSITHTTGSEKREMSIRNNPGFREFKHLQDLVVSLHSQQDRWSQQMDGLQKSIERIDNHLSGMSNRQVLTPFRLVWILLSIFVGLTASLAAYYF

>NP_741923.1_PH_domaincontaining_protein_[Caenorhabditis_elegans]
MEEFDENSRKSLKKQKKEYRDEKKRVNDELLSALRDPTVVVMADTLKIRGALKRWNRYYCVLKPGLLILYKHKKADRGDWVGTVLLNHCELIERPSKKDGFCFKLFHPMDMSIWGNRGPLGQSFGSFTLNPLNTSFLICRAPSDQAGRCWMDALELSFKCTGLLKKTMNELDDKNGDSSMNDGQRDESRMSRDSDGDDTRELAVSETDAEKHFQEIDDVQDEDHEDGKMSETSDTIREAFTESAWIPSPKEVFGPDGSLTEEVGEENKSLIWTLLKQIRPGMDLSKVVLPTFILEPRSFLEKLADYYYHADLISEAVAEPDPFQRIVKVTKFFLSGFYKKPKGLKKPYNPILGETFRCKWEHPDGSTTFYMAEQVSHHPPVSSLFITNRKAGFNISGTILAKSKYYGNSLSAILAGKLRLTLLNLGETYIVNLPYANCKGIMIGTMTMELGGEVNIECEKTGYRTTLDFKLKPMLGGAYNQIEGSIKYGSDRLASIEGAWDGVIRIKGPDGKKELWNPTPEVIKTRLPRYEINMDEQGEWESAKLWRHVTEAISNEDQYKATEEKTALENDQRARAKSGIPHETKFFKKQHGDDYVYIHADYRPWDNNNDIQQIENNYVVKTISRHSKRKTGNSEQLGSDNTSEASESDEEVIEPKIKKKEIVPAKSKPITPEVADERIKEMERKFELAIRRMEAANERQSSRTLNAIQSTLLFVFVVTSVVQSIFMFFMLRK

>NP_001370139.1_PH_domaincontaining_protein_[Caenorhabditis_elegans]
MLERRKERKLTITSPNEDMRIVEPPAHKQRRASLSVAYHRLLSFSSSPIKKQKKEYRDEKKRVNDELLSALRDPTVVVMADTLKIRGALKRWNRYYCVLKPGLLILYKHKKADRGDWVGTVLLNHCELIERPSKKDGFCFKLFHPMDMSIWGNRGPLGQSFGSFTLNPLNTSFLICRAPSDQAGRCWMDALELSFKCTGLLKKTMNELDDKNGDSSMNDGQRDESRMSRDSDGDDTRELAVSETDAEKHFQEIDDVQDEDHEDGKMSETSDTIREAFTESAWIPSPKEVFGPDGSLTEEVGEENKSLIWTLLKQIRPGMDLSKVVLPTFILEPRSFLEKLADYYYHADLISEAVAEPDPFQRIVKVTKFFLSGFYKKPKGLKKPYNPILGETFRCKWEHPDGSTTFYMAEQVSHHPPVSSLFITNRKAGFNISGTILAKSKYYGNSLSAILAGKLRLTLLNLGETYIVNLPYANCKGIMIGTMTMELGGEVNIECEKTGYRTTLDFKLKPMLGGAYNQIEGSIKYGSDRLASIEGAWDGVIRIKGPDGKKELWNPTPEVIKTRLPRYEINMDEQGEWESAKLWRHVTEAISNEDQYKATEEKTALENDQRARAKSGIPHETKFFKKQHGDDYVYIHADYRPWDNNNDIQQIENNYVVKTISRHSKRKTGNSEQLGSDNTSEASESDEEVIEPKIKKKEIVPAKSKPITPEVADERIKEMERKFELAIRRMEAANERQSSRTLNAIQSTLLFVFVVTSVVQSIFMFFMLRK

>XP_009516756.1_hypothetical_protein_PHYSODRAFT_470921_[Phytophthora_sojae]
MEHFKHNKRGGLLFQDRETLKKQQGVFKEVMMQVGSQLLSGKLAVRISLPIRIFEPRSLLERVANGWNYAPTVLKKAALSGADPIERMKFVMAFVAGGLHFCVGQLKPFNPILGETYEATYADGTQVFLEHVSHHPVKSAFTVVGPKGLYRMSGVYEFESVSTRNSLANYQNGTVTISFHDGAVITYTMPQIKMSGILFGDRVVEIVGSSRFEDVNNPLVGELHFDANNSFLKKSQSDDIKGCIYPAKVRKSAKHAVATVNGSWLSHLQFDGKTYWHVESEPAFEHTPVDNPLPSDVRYREDIVALKNGDEALAQSEKLRLEAVQRADLKLREEKQATRAKA

>XP_004346330.1_oxysterol_binding_protein_[Capsaspora_owczarzaki_ATCC_30864]
MASMTIAPSASAPTARTSNPSSTTLPHSISSPTMPIPIAINQNTANSVMLSTSQSSSDGYLEGYDNASMASPSGHRPSLRRQPSDGATYDARAAGSRPLSMVGEDDVAKLKQKKANYQKAKAARLRAANTFGGDAENVQSGWLKMRGFVKNWSKYYCVLRPGVLLYYKDEKRTEWSGSVLLNGAEVIERPTKKTGFCFKIYHPLEHTIYSTRGPKGEIAIVVPIHNDHCILRAPTEAEGQQWLSNIEEASLKPLGHHDDPRDDESDDDEFGDAQNLEQQSPPASASLTVPLSPILTAAAGNPTSDFEDEEEEEEADAVKETPYAQEPSREINVGPVTEEWGEESKSLMWSILKQLRPSVDLSKIPLPTFILEPRSFLDKLSDYYFHSDVLSVAANHADPVERMSIITKWFLSGFYAQPKGCKKPYNPIIGETFRCYWKHPTDSRTYYIAEQVSHHPPVSAWYAANRQEGYCVNGSLLTRSKFNGASAVSLLEGAATLHLLNFGEEYVITFPLVQVKGLIFPPLQMEMGGTPSIICAQTGLKAELEFKLKPMFGGDINGLKGKIKDATDRVLRTVNGRWDQTIEITNCQTNEVSALWTVSPDTVQRRLPRFKVAKDAQGEFESERLWQKVTAAIEAGDQYLATEEKTVLENNQRLVHKELKANNADWVPKLFRKNHDGTWVYKFMDKKKWNPTVDAREIESEGVVHTLSAAALAQRPATQGTRDRRGSTRQPLSAVSVASAAASGVVSSSTSSASTPAPAHTLTLPAASKDGHAALTYAAVVAHKPAASAQAAGHVSLPPFPAAHDYSDNQRQLAEAQHRAVEHLLSWRKTADDQLAAINIQLEATQQQLRTAQQLLARGGPANHGAAAAAAAAAAAPNSRSGLLLNSVILLLLVLIQLYVQLYKIPASTASASGSRGDL

>NP_732501.1_uncharacterized_protein_Dmel_CG42668,_isoform_D_[Drosophila_melanogaster]
MVYPSAKYPLQYSAFVPVRQAGNYTLIFARFRLLKKYLDADSQNEAPNAVMSGLESESESDPAEPAQDDVVDQQCVETSYVPFTEEEFGEQGEQVEELAEENKSLIWCIVKQVRPGMDLSKVVLPTFILEPRSFLDKLSDSYYHADLLSKAVQEDDAFTRMKLVVQWYLSSFYKKPKGLKKPYNPILGERFRCYWQHPSGSRTFYIAEQVSHHPPVSAFYVTNREDGFSITCSILAKSKFYGNSTSAVLEGAATMTLLPRGECYTATTPYAHCKGILMGTLSMELGGKINIECENTGYRTELEFKLKPFLGGADATNVVVGKIKLGKETLATINGHWDKECRVKDSKTGEETVLFKVDAETRSKRLTRYMVPLDLQEANESQRLWQRVSEAIANEDQVAATEEKTVLEERQRADAKERLSSDSVHMPDLFELDSYGQWLYKYADLRPWDSRNDVRQYECQFKVLTQTRHKSVPIVHGAEMIHPLRSSIETLSRTQRQSPAGQPLPPGGSAVPKAKNKSLVLAPRDTNSDSSQSPQGAVKRSSSSAIKQLALAVDQVNRVLEQHTRQLNEISQRLERMQYSPPPSSMSAHSLHMLGGGVSQSTVIKSLIYALIGLAFSLILRWLFK

>NP_732499.4_uncharacterized_protein_Dmel_CG42668,_isoform_F_[Drosophila_melanogaster]
MNLLQRIANWASDNRDGNVADKSAADAAKLNRKESYKAQRKNYRREKKRVASELMNSLQDPAVIVLADWLKVRGTLKSWTKLWCVLKPGLLLIYKSQKTKSSHWVGTVMLTSCQVIERPSKKDGFCFKLFHPLEQSIWAPRGPDKETIGAVVQPLPTAYLIFRAPSQAAGKCWMDALELSLRCSALLLRSNSSTGTAPTSSYIGEPLPVSHETQWSEADYEKHFNDHDLDADSQNEAPNAVMSGLESESESDPAEPAQDDVVDQQCVETSYVPFTEEEFGEQGEQVRPGMDLSKVVLPTFILEPRSFLDKLSDSYYHADLLSKAVQEDDAFTRMKLVVQWYLSSFYKKPKGLKKPYNPILGERFRCYWQHPSGSRTFYIAEQVSHHPPVSAFYVTNREDGFSITCSILAKSKFYGNSTSAVLEGAATMTLLPRGECYTATTPYAHCKGILMGTLSMELGGKINIECENTGYRTELEFKLKPFLGGADATNVVVGKIKLGKETLATINGHWDKECRVKDSKTGEETVLFKVDAETRSKRLTRYMVPLDLQEANESQRLWQRVSEAIANEDQVAATEEKTVLEERQRADAKERLSSDSVHMPDLFELDSYGQWLYKYADLRPWDSRNDVRQYECQFKVLTQTRHKSVPIVHGAEMIHPLRSSIETLSRTQRQSPAGQPLPPGGSAVPKAKNKSLVLAPRDTNSDSSQSPQGAVKRSSSSAIKQLALAVDQVNRVLEQHTRQLNEISQRLERMQYSPPPSSMSAHSLHMLGGGVSQSTVIKSLIYALIGLAFSLILRWLFK

>XP_002591025.1_hypothetical_protein_BRAFLDRAFT_69422_[Branchiostoma_floridae]
MTADDYGDPCLQFLAKLHGGIAALLLQSLLLGCGCMQAGVPAKPANIPEPPRSSDLLALPESRMLLLGRRGSQLRRTSIIPCITVEAVNLLLTAVNHSLTAVNHPLHHCGSCQSSPASLWKLSIIPCITVEGSGGEENFLNKYDSKGSPKLSHRSKSETKLYEDDSDRSKLSKKESLKEQKKNYRREKKRAAKELLNTLKDPSVVVLRDWLKIRGTLKGWQKYWCVLKPGVLIIYKGPKHGAWVGTILLNACEIIERPSKMNGFCFKVFHPLDQSIWASKGPKGETVPAITQPLPTSYLILRAATDADVHEIHETLVYVHDWPGRCWMDAMELSLRCSSLLMRSMVKDAATNGQQSMSTLDTSDPNQQSRTLSWNESDIERHFQVHLALGRTITTQNGEEEEKEEKEEEKDEDEKESKGSDSEASKQHDQVFEEIRENTCVLTLPVFLVDEDEKESKGSDSEASEQHDQVFEEIREYTCVLTLSVFLVDEDEKESKDEDEKESKGSDSEASEQHDQVFEEIRENTCVLTLPVFLVDEDEKESKGSDSEASEQHDQVFEEDLEPPKETVYRENTCEELGQQGGASQTEEVADENKSIIWTLIKQVRPGMDLSRVVLPTFILEPRSFLDKLSDYYYHADLLSDAVTMTKSSVLFPDLSAVTMTTLSVLFPALSAVTMTTSSVIFPALSAVTMTTSSVNISLALSAVNIDDPFGRMKQIVRWYLSGFYKKPKGLKKPYNPILGETFRCMWPHPQTGSKTFFIAEQVSHHPPVSAFYVTNRQDGFCINGSILCKSKFYGNSLSAILDGTACLTLLNRGEDYAITMPYVSCKGILYGTMTMEMGGKVSLTCDKTGYRTEIEFKLKPFLGGSDASNQITGKIKLGKETLATLEGHWDQDVYITEKSTGSDKTEVFWSVTDEVKSRRLKRQTVRFEDQGDFESEKLWQHVSAAISACDQNKATNEKYILEEQQRKDARERKEKRADWVPKLFEREGAEEHNWIYKHIESVSYTCIHLNTFYYTHLDNVQTCTDHLVKPPSQSHRDSDRSSSEPRPDEDDASDDERSDVSSRADSGRGPRSRHHYAPSTIEQAVRPLVRAQQETNDRLADLSGRLRMLANQNAEHSNYLQNKDWLLLAVVMLFQVVTMYMFSR

>XP_021330869.1_oxysterolbinding_proteinrelated_protein_8_[Danio_rerio]
MEPCAESQADPDRAQHHAESRENPLTPVALMPSDDAAFLTPAKMSQKGKEAGLHTPNKDQLTSPSLSPGISYSHGFDRGKEEILPLKEDSTHSISKSKSETKLYNGSDKDVSVSGNKLTKKESLKVQKKNYREEKKRATKELLSTITDPSVIVMADWLKIRGTLKSWTKLWCVLKPGVLLIYKTNKNGQWVGTVLLNACELIERPSKKDGFCFKLFHPLEQSIWAVKGPKGEAVGSITQPLPSSHLIFRAASESDGRCWMDALELALKCSSLLKRTMIREGKEDPPQTAEHSHINFYSLLRAHNMQGFQFNDSDQFKDPDLYSDKSDRENEPEQEEWENEVMEKSEESDSDTSERQEDSYIDLDPNETLRETMYIEQSHEELGEAGEASQTETVSEENKSLIWTLLKQVRPGMDLSKVVLPTFILEPRSFLDKLSDYYYHADFLSEAAVEENAYNRMKKVVKWYISGFYKKPKGLKKPYNPIIGEMYRCLWIHSRTNSKTFYIAEQVSHHPPVSAFYVSNRKDGFCLSGSILAKSKFYGNSLSAILDGEARLTFLNRGEDYVMNMPYAHCKGILYGTMTLELGGQVCIACEKTGYSAQLEFKLKPFLGSSDSVNQISGKIKLGKEVLATLEGHWDSEVFINDKKTGELETFWNPTPELRQQRLTRCTVPPEEQAEFESERLWQHVTRAINNKDQTEATNEKFILEEAQRKAARERKAKCEEWTPALFEQDPTTGEWHYRYADTRPWDPLNDLIQLEKDGCIQTKVRHRTPMVRSASVVSLSTQQGPRRDNYLSQVTGPKRKHKTDKPKSPESGCSSPEPDRQDSSGSERHKSKHSSRHRKKGTDLSEIQSAIESIRQTQEDINRSVSALRSRMASQTSTESSFLTHRDIAIILFLIFLQVLLNFIFK

>XP_012814032.1_oxysterolbinding_proteinrelated_protein_8_isoform_X1_[Xenopus_tropicalis]
METISLDGEHEKTPNNCENKDSHGSSHLVANSESPLILPAKMSQRQGKDAYLSPTKDLVQATLSPGIIHSHAFHLRTVTLNKHLAMKEEGPLRRRSCAGVSPGTFLPRPDGRKLVRNASFGGYNELSPALPGFDKGKDEVLQSKEDTSISMSKSKSESKLYNGSERDIASASSKLTKKESLKVQKKNYREEKKRATKELLSTITDPSVIVMADWLKIRGTLKSWTKLWCVLKPGVLLIYKTPKNGQWVGTVLLNACEIIERPSKKDGFCFKLFHPLEQSIWAVKGPKGEAVGSITQPLPSSYLIIRAASESDGRCWMDALELALKCSSLLKRTMIREGKEHDLNSSADNSHVGFYGLLRVNNLHSNENFQLNDSEIERHHFKDQDTYSDKSDKDNDHDHDESDNDGLGKSEESDSDTSERQDDSFVDPDPPELIKETTYVEEAHEELGEAGEASQTETVSEEHKSLIWTLLKQVRPGMDLSKVVLPTFILEPRSFLDKLSDYYYHADFLSEAALEENPYSRMKKVVKWYLSGFYKKPKGLKKPYNPILGETFRCLWIHPRTSSKTFYISEQVSHHPPVSAFYVSNRKDGFCLSGSILAKSKFYGNSLSALLEGEGRLTFLNRGEDYLMTMPYAHCKGILYGTMTLELGGSVTITCEKTSYSATLDFKLKPFLGSDDSVNQISGKIKLGKEVLATLEGHWDSEVFIHDKKTDVFETFWNPTLEIRHHRLIRCTVNQEEQGEFESERLWRLVTLAINNKDQTEATQEKFVLEEAQRKAAKERKAKGEEWTCKLFEQDPLTGEWHYKYADTRPWDPLNDLIQFENDGVIQTKVRHRTPMVRSGSVINLSNQGAKREKCSYQVCVPKLKHKASGQQKKGESGCSSPELDNQDSSGSEAGASDEEQMNVLKPLAHLLSHNNRVRKKGADHGELQSAIDSIKKTQEEINRNIIALRNRVSVNTSSTENSFLQQRDYFIIFFLITLQIAVSYLFK

>XP_015138651.1_oxysterolbinding_proteinrelated_protein_8_isoform_X1_[Gallus_gallus]
METVLVDGELDRNSHHGDNRDSHGPSTVVTNSDESQLLTPGKMSQRQGKEAYFTPTKELLQPSLSPATAHSHGFDKGKDEASQSKEDTAHSMSKSKSESKLFNGSEKDISLSSSKLTKKESLKVQKKNYREEKKRATKELLSTITDPSVIVMADWLKIRGTLKSWTKLWCVLKPGVLLVYKTPKNGQWVGTVLLNACELIERPSKKDGFCFKLFHPLEQSIWAIKGPKGEAVGSITQPLPSSYLIIRAASESDGRCWMDALELALKCSSLLKRTMIREGKEHDLNSSSDSAHVSLYGLLRANNLNSGDNLPLNDSEIERHHFKDQDMYSDKSDKENDHEHDESDNDGLGKSEESDSDTSERQDDSYVDPEPIDIKETTYLEQSHEELGEAGEAAQTEVVSEENKSLIWTLLKQVRPGMDLSKVVLPTFILEPRSFLDKLSDYYYHADFLSEAALEENAYNRMKKVVKWYLSGFYKKPKGLKKPYNPILGETFRCMWIHPRTNSKTFYIAEQVSHHPPISAFYVSNRKDGFCLSGSILAKSKFYGNSLSAILDGEGRLTFLNRGEDYVMTMPYAHCKGILYGTMTLELGGTVNITCEKTGYSATIEFKLKPFLGNNDSVNQISGKIKLGKEVLAILEGHWDSEVTIRDKKTDVSETFWNPTSDIKQRRLPRYTVKFEEQDDFESEKLWQQVTKAINNKDQTEATQEKYVLEEAQRKSAKERKLKGEEWTCKLFDQDSVTGEWHYRYADTRPWDPLNDMIQFEKDGTIQTKVRHRTPMVTVPKIKRKPTGQKKGECGFSSPEPDNQDSSGSEAQLTKHNTRIRKKGADLGELQSAIESIKETQEDIKRDIMALRNRVTSNSPPVDNQFLQLKHYIFILLLVLLQLIINFLFK

>XP_016281161.1_PREDICTED:_oxysterolbinding_proteinrelated_protein_8_isoform_X1_[Monodelphis_domestica]
METVLTEGGDLERNLHVGDAKDVHGPSTLVTNNDDSHLLTSAKMNQRQGKEAYLTPTKDLLQPSLSPGSAHSQGFERGKDDLSQNREETSHSMSKSKSESKLYNGSEKDISSSSKLTKKESLKVQKKNYREEKKRATKELLSTITDPSVIVMADWLKIRGTLKSWTKLWCVLKPGVLLIYKTQKNGQWVGTVLLNACELIERPSKKDGFCFKLFHPLEQSIWAVKGPKGEAVGSITQPLPSSYLIIRATSESDGRCWMDALELALKCSSLLKRTMIREGKEHDLSMSSENSHVTFYGLLRANNLHSGDNFQLNDSEIERQHFKDQDMYSDKSDKENDQEHDESDNEGIGKSEESDTDTSERQDDSYIDPEPTEVLKETTYTEQGQEELGEAGEASQTETVSEENKSLIWTLLKQVRPGMDLSRVVLPTFILEPRSFLDKLSDYYYHADFLSEASLEENPYFRLKKVVKWYLSGFYKKPKGLKKPYNPILGETFRCLWVHPRTNSKTFYIAEQVSHHPPISAFYISNRKDGFCLSGSILAKSKFYGNSLSALLEGEARLTFLNRGEDYVMTMPYAHCKGILYGTMTLELGGTVNITCQKTGYSAVLEFKLKPFLGSSDCVNQISGKLKLGKEVLATLEGHWDSEVIIHDKKTDSSEVFWNPTSEIKQRRLIRHTVKFEEQEPFESEKLWQRVTRAINVKDQTEATQEKYVLEEAQRKAARERKGKNEEWICKLFELDAATGEWHYRYSDTRPWDPLNDLIQFEKDGVIQTKVRHRTPMVSVPKMKHKPSRQPKKAGKGYSSPELDIQDSSGSEAQVLKPSSRRKKTVDLGDLQCSIDCIKQTQEEIKRSIVALRNHLISSSSVTDTFLQPRDYFIIFLLILLQIIINFMFK

>NP_780698.2_oxysterolbinding_proteinrelated_protein_8_isoform_a_[Mus_musculus]
MEAALADGEPDRSSLLGDSKDVLGPSTVVANSDEPQHLTPGKMSQRQGRDANPTPTRDLPQPSLSPASLHSQGFERGKEDISQNKDDSSLSMSKSKSESKLYNGSEKDSSTSSKLTKKESLKVQKKNYREEKKRATKELLSTITDPSVIVMADWLKIRGTLKSWTKLWCVLKPGVLLIYKTQKNGQWVGTVLLNACEIIERPSKKDGFCFKLFHPLEQSIWAVKGPKGEAVGSITQPLPSSYLIIRATSESDGRCWMDALELALKCSSLLKRTMVREGKEHDLSISSDSTHVTLYGLLRANNLHSGDNFQLNDSEIERQHFKDQDLYSDKSDKENDPEHDESDNEVLGKSEESDTDTSERQDDSYIDPEPVEPLKETTYMEQSHEELGEAGEASQTETVSEENKSLIWTLLKQVRPGMDLSRVVLPTFILEPRSFLDKLSDYYYHADFLSEAALEENPYFRLKKVVKWYLSGFYKKPKGLKKPYNPILGETFRCLWIHPRTNSKTFYIAEQVSHHPPISAFYVSNRKDGFCLSGSILAKSKFYGNSLSAILEGEARLTFLNRGEDYVMTMPYAHCKGILYGTMTLELGGTVNITCQKTGYSAILEFKLKPFLGSSDYVNQISGKLKLGKEVLATLEGHWDSEVFINDKKTDNSEIFWNPTPDIKQWRLIRHTVKFEEQDDFESEKLWQRVTKAINAKDQTEATQEKYVLEEAQRQAARDRKTKTQEWVCKLFELDPLTGEWHYKFSDTRPWDPLNDMIQFEKDGVIQTKVKHRTPMVSVPKMKHKPTRQQKKVVKGYSSPEPDIQDSSGSEAQSVKPSTRRKKGIDLGDIQSSIESIKQTQEEIKRNIMALRNHLLSSTPATDYFLQQKDYFVIFLLILLQVIINFIFK

>NP_065892.1_ORP8_Homo_sapiens
MEGGLADGEPDRTSLLGDSKDVLGPSTVVANSDESQLLTPGKMSQRQGKEAYPTPTKDLHQPSLSPASPHSQGFERGKEDISQNKDESSLSMSKSKSESKLYNGSEKDSSTSSKLTKKESLKVQKKNYREEKKRATKELLSTITDPSVIVMADWLKIRGTLKSWTKLWCVLKPGVLLIYKTQKNGQWVGTVLLNACEIIERPSKKDGFCFKLFHPLEQSIWAVKGPKGEAVGSITQPLPSSYLIIRATSESDGRCWMDALELALKCSSLLKRTMIREGKEHDLSVSSDSTHVTFYGLLRANNLHSGDNFQLNDSEIERQHFKDQDMYSDKSDKENDQEHDESDNEVMGKSEESDTDTSERQDDSYIEPEPVEPLKETTYTEQSHEELGEAGEASQTETVSEENKSLIWTLLKQVRPGMDLSKVVLPTFILEPRSFLDKLSDYYYHADFLSEAALEENPYFRLKKVVKWYLSGFYKKPKGLKKPYNPILGETFRCLWIHPRTNSKTFYIAEQVSHHPPISAFYVSNRKDGFCLSGSILAKSKFYGNSLSAILEGEARLTFLNRGEDYVMTMPYAHCKGILYGTMTLELGGTVNITCQKTGYSAILEFKLKPFLGSSDCVNQISGKLKLGKEVLATLEGHWDSEVFITDKKTDNSEVFWNPTPDIKQWRLIRHTVKFEEQGDFESEKLWQRVTRAINAKDQTEATQEKYVLEEAQRQAARDRKTKNEEWSCKLFELDPLTGEWHYKFADTRPWDPLNDMIQFEKDGVIQTKVKHRTPMVSVPKMKHKPTRQQKKVAKGYSSPEPDIQDSSGSEAQSVKPSTRRKKGIELGDIQSSIESIKQTQEEIKRNIMALRNHLVSSTPATDYFLQQKDYFIIFLLILLQVIINFMFK

>XP_005170763.1_oxysterolbinding_proteinrelated_protein_5_isoform_X2_[Danio_rerio]
MLENNMENDANSDKSEREAHEDSDNAANENGGRLTEESDMDQSDDVCLQATGFVEEAHEEMGEAGEASQVETVSDENKGLIWTLLKQLRPGMDLSKVVLPTFILEPRSFLDKLSDYYYHADLLSKAVTEESPYGRMKQVLRWYLSGFYKKPKGLKKPYNPILGEMFRCCWLHPQTDSCTFYIAEQVSHHPPVSAFYISNKKDGFCISGSILAKSKFYGNSLSAILDGKARLLFLTRDEEYVITMPYAHCKGILYGTMTLELGGKITIECEKTQCYTELEFKLKPFLGSSCNVNQISGKIRIGEDILATVEGHWDSKVHLIEKKTGHQEVLWNPGPDIRRQRLKKRVVPIDQQEAFESERLWQHVTQAINDKDQNRATQEKFVLEEAQRQEARERAERAWNPRLFTLDADTNEWHYKHADTKPWDPERCLVQFEKDGIIQTKEKSQRRRNRYSYSQDWAGQQKVRVNGKHRKSSSQPSSCSQNTESSSTTPEPNHESSDNEGFMNQCARCSKEVKDIALIEASVAAIQKTQQDIQRNLSALGRQIARHKTAEESKSLSGRHFLILCMLLLFQLLINHVFT

>XP_032231796.1_oxysterolbinding_proteinrelated_protein_8_isoform_X1_[Nematostella_vectensis]
MAENVRIEPEVDTILSPTITMTDPFPSCNVDSDEFSSDDERDEDLVENAADTSLLANFSRNRSNDGTEDADTTPSSKSVKDDSEIKDESYLMKNQLSSGKMDKKDKMLDKNLDKKLSDRSPALARKQNKESLKAIKKSYRLEQKKRTKELSIAIKDPSVIILSSYLKIRGSLKGWAKFWCVVKPGMLIIYKSPKHGVWVGTVLLNSCELIERPSKKDGFCFKLYNPLEHYIWATKGPKGEMAGAIVQPMPKDHLILRALTESDGRCWMDALEVAQRQGYHIQRDRKGMVSDLYGSKEDREDREEREDEPTAPDGDDDSLNDGLEKSDSENEMDETIEPEKEEGRPDEPEEEEPFEETLYVPDKETEYFGEAGEATEEIEDENKSILWALLKQVKPGMDLSRVTLPTFILEPRSFLDKLSDFYYHTDILSRAACEENPYSRMKEVIRWYLSGFYKKPKGLKKPYNPIIGEMFRCYWQHPQGSRTFFVSEQVSHHPPVSAFYVSNRQDGFVINGAILAKSKFYGNSSSAILDGAATLALLRFGEEYTMTMPYAHCKGILIGTLTMELGGTVTINCEKTGYKAEIEFKLKPFWKKSGESNYIAGKIIMGKETLCKIEGKWDGEIVITDLKASNAIDEEPFPDLFWEPTPEIRSQRLKRHLVDYSTQGEFESEKLWIGVSNAIKAADQEGATREKFSLEEAQRKGHRERKEQGVDWVPRLFERDPSAPEAINRWVYKYRDVRPWDPLTDLVEYENSGIVKTRYRLKAPMVRATSVLCVQTPGVKKASSKRKRPTSGRSRLGVPKGSRRGSLERSGCSTPDPEHSDSVEDEYDDVSVRDLVDITTLEKTVQPIRDLQKECVQQMRAIRGDLRRHYNSHQDEIASLQFKDWALILLLVIFQSIVQWWTKS

>NP_077251.1_oxysterolbinding_proteinrelated_protein_5_isoform_1_[Mus_musculus]
MALSILSEQFCIRRPRQKPPSTHTMKEEAFLRRRFSLCPPASTPQKTDPRKVPRNLLLGCENELGPITPGRDMESNGPSQPRDEEPQTPGSATKVPLAEYRLCNGSDKECTSPTTRVSKKDALKAQKENYRQEKKRATKQLFSALTDPSVVIMADSLKIRGTLKSWTKLWCVLKPGVLLIYKTPKVGQWVGTVLLHCCELIERPSKKDGFCFKLFHPLDQSVWAVKGPKGESVGSITQPLPSSYLIFRAASESDGRCWLDALELALRCSSLLRLSTCKQGRDGEQGSSPDASPSSLYGLPTSATIPDQDLFPLNGSALENDAFSDKSERENAEDSDAETQDHSRKTNESGSDLLDSPGGPWRGTTYVEQVQEELGELDETSQVETVSEENKSLMWVLLRQLRPGMDLSRVVLPTFVLEPRSFLGKLSDYYYHGDLLSRAAAEDDPYCRMKLVLRWYLSGFYKKPKGIKKPYNPILGETFRCRWLHPQTNSHTFYIAEQVSHHPPVSAFYVSNRKDGFCMSGSITAKSKFYGNSLSALLDGKAKLTFLNRKEEYTLTMPYAHCRGILYGTMTMELGGKVNIECEKNNLQAELDFKLKPFFGSSANINQISGKIMSGEEVLARLTGHWDRDVFIKEESSGGTELFWTPSEEVRRQRLKRHTVLLEEQSELESERLWQHVTRAIREGDQHKATQEKSVLEEAQRQRAREHQQSLTPWKPQLFLLDPLTQEWRYRYEDLSPWDPLKDIAQYEQDGILHTLQRETMSGQTTFLGSPDSRHKRPSSDRRLRKASDQPSGHSQVTESSGSTPESCPDLSDEDFVPGGESPCPRCRREVHRLKMLQEAVLSIQEAQQELHRHLSTMLSSTVRAGQAPAPSLLQNPRSWFLLCIFLTCQLFINYILK

>NP_065947.1_ORP5_Homo_sapiensMKEEAFLRRRFSLCPPSSTPQKVDPRKLTRNLLLSGDNELYPLSPGKDMEPNGPSLPRDEGPPTPSSATKVPPAEYRLCNGSDKECVSPTARVTKKETLKAQKENYRQEKKRATRQLLSALTDPSVVIMADSLKIRGTLKSWTKLWCVLKPGVLLIYKTPKVGQWVGTVLLHCCELIERPSKKDGFCFKLFHPLDQSVWAVKGPKGESVGSITQPLPSSYLIFRAASESDGRCWLDALELALRCSSLLRLGTCKPGRDGEPGTSPDASPSSLCGLPASATVHPDQDLFPLNGSSLENDAFSDKSERENPEESDTETQDHSRKTESGSDQSETPGAPVRRGTTYVEQVQEELGELGEASQVETVSEENKSLMWTLLKQLRPGMDLSRVVLPTFVLEPRSFLNKLSDYYYHADLLSRAAVEEDAYSRMKLVLRWYLSGFYKKPKGIKKPYNPILGETFRCCWFHPQTDSRTFYIAEQVSHHPPVSAFHVSNRKDGFCISGSITAKSRFYGNSLSALLDGKATLTFLNRAEDYTLTMPYAHCKGILYGTMTLELGGKVTIECAKNNFQAQLEFKLKPFFGGSTSINQISGKITSGEEVLASLSGHWDRDVFIKEEGSGSSALFWTPSGEVRRQRLRQHTVPLEEQTELESERLWQHVTRAISKGDQHRATQEKFALEEAQRQRARERQESLMPWKPQLFHLDPITQEWHYRYEDHSPWDPLKDIAQFEQDGILRTLQQEAVARQTTFLGSPGPRHERSGPDQRLRKASDQPSGHSQATESSGSTPESCPELSDEEQDGDFVPGGESPCPRCRKEARRLQALHEAILSIREAQQELHRHLSAMLSSTARAAQAPTPGLLQSPRSWFLLCVFLACQLFINHILK

>XP_001234139.3_oxysterolbinding_proteinrelated_protein_5_isoform_X1_[Gallus_gallus]
MPCCTKTPTAHAMKEENFLRRRFSLCPASSTPQKVDPRKLTRNLFFGADNDIYPLSPGKDVEGNSPSMLKDETPQTPNSVSKIEYKFCNGSDKECVSPTAKFTKKETLKVQKKNYRQEKKRATKQLFSALKDPSVVITADWLKIRGTLKSWTKLWCVLKPGVLLIYKTPKIGQWVGTILLHSCELIERPSKKDGFCFKLFHPLDQSIWAVKGPKGENVGSITQPLPSSYLIFRAASESDGRCWLDALELALRCSSLFRLSASKQGKDGEMNGSSDSAPAGLNNGLHASTISEQEFFHLNDSALENHHQLENDAFSDKSERDNMEESENETQENSRKTNESESDQSEIHGEVSPGRKGTTYVEQIYEEFGETGESSQTETVSEENKSLIWILLKQLRPGMDLSRVVLPTFILEPRSFLNKLSDYYYHADLLSQAALEDDPYSRMKQVLRWYLSGFYKKPKGIKKPYNPILGETFRCCWFHPQTNSHTFYIAEQVSHHPPVSAFHVSNRKDGFCITGSILARSKFYGNSLSALLDGKAKLMFLNRGEDYIITMPYAHCKGILYGTMTMELGGKVTIDCEKTNHRAELEFKLKPLFGGSTSINQISGKIKSGEEVLANLDGHWDGEVHINELKNGNAEVFWNPTSEVRKQRLKRHIVLFEEQTDFESERLWQHVTSAINKGDQHKATQEKFVLEEEQRNAARERRENGTEWKPLLFRHDSTTDEWRYKYEDLRPWDPLNDIAQFERNGILQTMERHLSTRMSNHKATCMNNQITLHKRSTKECRRRKTSDQPSNHSQNTESSCSTPESVQELSDDDGKYLGFDSLCTQCGKEMNQLKEIRSAVLSLQRAQQDIRRNLSALNKKSFHRKVTSGSFLLDSRCWFLLCIFLTCQLFINYVFK

>XP_007497828.1_PREDICTED:_oxysterolbinding_proteinrelated_protein_5_[Monodelphis_domestica]
MKEENFLRRRFSLCPPSSTPQKIDPRKLTRNLFFSGDHEIYPLSPGKDVEASNGVSLMKDEVPQTPISMPKALQTNDYRFCNGSDRESLSPTAKVIKKETLKVQKRNYRQEKKRATQQLFSALKDPGVVIMADWLKIRGTLKSWTKLWCILKPGVLLVYKTPKVGQWVGTILLHSCELIERPSKKDGFCFKLFHPLDQSIWAMKGPKGENVGSITQPLPSSYLIFRAPSESDGRCWLDALELALRCSSLFRLSTSKQGKDGELTGLLDSLHMPLDGLLHGGTISDQDLFHLHEGSLENHQLEHDAFSDRSEKDTIEESENDTRENSRKTNDSESELSETPGELGQEKKGTTYIEQIYEEFGETGESSQTETVSEENKSLIWILLKQLRPGMDLSRVVLPTFILEPRSFLNKLSDYYYHADLLSRADLQENPFSRMKHVVRWYLSGFYKKPKGIKKPYNPILGETFRCCWYHPQTNSHTFYVAEQVSHHPPVSAFHVSNRKDGFCITGSILAKSKFYGNSLSALLEGKATLTFLSRGEEYVITMPYAHCKGILYGTMTMELGGKVTIECEKNNYQAELEFKLKPFFGGSSGLNQISGKIKSGEDVVASLEGHWDREVYISDPKNGGPDVFWNPTAEIRRQRLKRHIVLFEEQKELESERLWQHVTSAIHKGDQLKATQEKFVLEEEQRRRARERQEALLDWKPRLFLQDPSSHEWRYRHEDLRPWDPLADIAQFEQDGRLQTLGRRKPLRLSAHPAVFGSPTARHKRPGKDCRHRKASDQPSNHSQNTESSCSTPESVQDLSDDEGDADCESSCARCGKESQHLKDIHTAVLSLQKAQQDIHRNLTALNKKSLCRRTPGSFLRSSRCWFLLCVFLTCQLFINYVLK

>XP_014145168.1_hypothetical_protein_SARC_16198,_partial_[Sphaeroforma_arctica_JP610]
MDLSKVTLPTFILEPRSFLELLSDYFYHSNVLQIAARTHDDPMQRMIEVVRWYLSGFYKT

>XP_014145006.1_hypothetical_protein_SARC_16361,_partial_[Sphaeroforma_arctica_JP610]
MKLHLQELDEVYTITLPSAIVKGIFFGTMMVELGGTVKVENMNNGLVAEVDFKQKPMIGGQYCAISGGI

>XP_009494617.1_hypothetical_protein_H696_02438_[Fonticula_alba]
MNPLKPAASSKAKPSSPTEQQAHSPSKSELGKSATRQPEQPAVAGIRLGIAASPRRDAPEEAATRHTRPQLQAHSNDENAEPPVSVPPPEAKLPEELLLPSSTTPSSVPHSGSDSNPDSDPKPDPQGARMLQPLAPEAHAAQAPTSQIEPMSDRSSHGLSSVSSSERMVIDHMKKLQPGSPQSVRPRVVAPSSVVRHAAALSAASSPPTSSPCHSDVEPAGTDAFGTVTGAGAAAAVAAVLVPPSPALLTTSAPEEPLRRRANGEKHPSIIMELLKQLKVGMDLHKITLPAFILEPKSLLEKISDYMSHPKFIIKCVR

>XP_009493217.1_hypothetical_protein_H696_01056_[Fonticula_alba]
MRPLEEGVLAATGQVLGLAELRSGSKKVFKPRPWMIVTLILEGAWLIVREAPWSGVRFVGAGPGAQVIVPSLEGRLLVAFHLEKVDIDIAPAKRRLRLSKEGRQVELRELSPGAVLLRSSRLQVTHRQVSSLAMSGAADDDPLAGALLDLLSPLDAETPGEVRARGNTGGLFPFDWWSEMVTRQIFLAGGNLVREYAPSIRPGSILTTSSDDEFYRRHGMEQFFGGDSPTSGMPVPCDLGEVSPMPDAGNLGDLPEPSPADKQMEMSQSSTSDSLEGRLATCRANDEDDEEDLFYTPLSMSRVCSPDAGEGAAACGDTRSPGAPESTLTGKLSSQTLLLDDIEATADTVRTSLPCDSSGKLPSIYSLLKQPARDLARFLLPLDWHEPSTPTVRFAEELIHSGPLLARAIRCAETADCALELLGPGEAMGIPAFDSLEDLLSLSWFPEALKHALAGGHWTSGPGHPPEVAPFKRPTFSSDMEAQWWAEACPKLGRMCLVAALAGCAPFGPPTAPGRRSAPLGTLIGETLELNRHRSGVGFRGLSEQLTDQQTIIFAESTTPLRSHVSGRPGRWCTIQEATFSVPRLSIRSLGELEVPISGSGCLRLDFGDPRDPSPGAGPGTENYTWNKPGTRVRGLLAEVGTWVEHVGTIQLDCVETGLRVVMAHELSTDSGGLLDREHLAAAGGPLPNGDPRLRRNFARVSGELIHAESGRRVATLVGRHDRFLAMRPETGAGPPLPYRVIWVNDDVGLGDRQFGFSVFASSLASLDASHLAPGEDMTPGVPRINLAPTDARLRPDLRHWELGRAAEAAESRAKLAPRRPGQNEPRYFQKVASLGIADPRFPVTSSGWTVRPAPGAEDAHRQALYWSIKEQGTWLRSISEEDPSVAEHLRLSGRMHP

>XP_022841049.1_Oxysterolbinding_protein_[Ostreococcus_tauri]
MMCACASSAAVREAATGASDEEKFHDAREAFASDDEGSPTPRWRRSRAGSEARGAVCTSADVDGGATTRALTGAQPREDWEERDADVHGELERASREMEMESRGSVMARARAFAKASARLAKTMLGGRSVDLTSFLGTPIRWCARMSVLQITTDAESSLGKDVVPRTVRFLETLRSAREATSARERACRVALAILADGEPPASLRKPLNPILGETTSHSVEFPRTNERFESTWEQVSHHPPNSASSQTGPGVRIVSEVRPSPRLVGAHIDVELVGYIEITLTERNETYVSDIPSFEWRFLPRWHARMKRKVKSQIRCEASGYRVEFSYGSSRSVKGLVYGPDGAIEATINGRYDGKIVAESKRDRSVIAAYDFAQTKSIRAHVVRHTHLEDEFDTEVVWRDCFAAMDANKWDDARAAKRSVEERERAKRRERKASGQKFTPRFFDYDARVGRWVRNSRARTT

>XP_005708754.1_oxysterolbinding_proteinlike_protein_[Galdieria_sulphuraria]
METSETDSTGNTQTCETRQTRSNSWTAWGIHAISTITDGAKQLYTKALGLDELEEKKLEDEEGVTHVEVDEKTKRDLWNQLSTLVGADVINMRLSLPVWLFEPTTALQRMCETLQFHQLLDMAATCEEPVERDALVAAFTVSAFAHTERVYKPFNPVLGETFEWTSRDGTTRVLCEQVSHHPPVSVSYTEGPGWVAQEVFSCNAYFLGNSVEIRNTGSRYVYLTSFDERYEWTLPVSAAQNLFVGGSFIDHYGELILRSSPRGSVTSLTFTKCGWFGRGRYAVNGDIVDADGYRVMELSGEWNRGLVGFRLDKSSGERVDAKSLWYAGEHKPAVKRDKYNFTNFTYELLEVPDNAESIIPPTDSRFRPDRRALEGNNLSLANLEKVRVENIQRERENQRQKTGTTYVPAWFYQDDNNEWHFGGKYWKETRNMSEDQKEQMKLW

>XP_005713795.1_unnamed_protein_product_[Chondrus_crispus]
MASSAYSTVIGPPPESFAELTPTTALTEGRGAPKPSTEFGNVDAASRQALWRQLASVVGMDVMNMRLSLPIWLFEPSTALTRMIETFEFSDLLDRAATSDDPVLRDCLVAAFVISAFSHTERVRKPFNPVLGESFEYTHPLNGMRFYAEQVEHHPPVSVSHCEGKGWEAGEVVDIAATFHGNSIEVRNVGSRYINLHKTGDRYSWTLPQALVSNLFVGGAFVDHFGTVELKNETTGTSATLNLTQCGWFSAGRYEVAGELLDSNATKIVLFKGAWNKFLDCERVAKAKGEGTNRLWMAGSHLLSEEEGGGVTGVYANCTKFTKKILSLHSDHALELPPNDSRFRPDRLALEKGNRTVAAEEKIRIEQMQRDRRAAAKKRVESGGGKIQPRYFRKVAEDKQLWEPIGNYWTDSRNLSEDDRKNMVMW

>XP_003077924.1_Oxysterolbinding_protein_[Ostreococcus_tauri]
METLVDDVGGALPPKGPNAAGASEASAVPGHRSWISRSWTWGSDLVNAAAGAVGDGLNYLAGYDDLEVTEGGEGAHAGEHTEGEAVDERKAMWAQLKEMMGSDVMSVFSLPTFLMEPVSTLQKMAEIMQYQRLLDDANEEEDPEVRLAKVTAFAVAVYSTMERAKKPFNPILGETFELKMDDGSTYLAEQVSHHPPIGAGHVKTKNFTYDITSAVTTKFMGNWVDVFPVGRTRITLHKTGEIFNIVPPNSRVNNLIIGRIWIDTFGPMKVMNLTSGAIAELDFKACGMMSLGRYVVSGEIKRPDGTPALNVSGHWNRDLSYSIVDGGASVKLWEVDPWPKPANKYGFTTYTIGMNEMSSAPDYGLLASDSRLRPDRVALDKGETNATSLKHQLEEQQRAERRERKEKDDVWAPRWFKKAEDAELHELEEAVGTDVWEYNGEYDANKPVGAPKKFSPWQYPKD

>XP_003056225.1_oxysterol_binding_protein_[Micromonas_pusilla_CCMP1545]
MSMDAADPKSAGWLSRLGAGLAKSFNEGLDYLAGVEDPDEFERKDAGDGADDAEPDETASERKALWSQLKGMMGADVMSLLSVPVFIMEPLTTLQKMGEIMHYCDILDRACEEEDEHARLALIATLAISTYSCSERTKKPFNPILGETWEMALPNVDGHYVAEQVCHHPPIGAGHAETPKWTYDITSAVKTKFMGNWVDIYPLGRTRIVLKRTNEAFNIITPTTRINNIIVGRTWMDSFGELKVCNLTTGASAVIKFKECGLLGGGRWEVSGEILNAAGEPRMSLRGKWNEKVEVTRPAGGGTETLWTKLPMPTDDNPYGFTEFTRACNLMSTAPPGLLASDSRLRPDRVALEEGANAEAGAAKHALEEMQRAERRRRDAAGTTWTPRWFVKSSNAELHDLEKDIGTDVWEIKPEYRESLTRRLAEKNGAGAGAASVDDVAFDPWEFPDTAKMQVAAASSSSSAAAGPEDATTAGAGSDVVAKE

>XP_001699422.1_oxysterol_binding_protein_[Chlamydomonas_reinhardtii]
MADAGAAGGGDASQPTLLQSWYNWGGSMVTYAQQTLNSFMGWEDLEVVDPEAEKAKKGQDATATGLLEQERKQAWGTKQFQQYIGADVTSLLSVPVWIMEPFTILQKAAEIMEYTELLDAADTTEDEFDRFALVAAYCVSPFGAAERAWKPFNPILGETFELEVGSGVRYLAEQVSHHPPICAAHAQNSHFRYDLVSAPTTRFLGNSLEVYPYGRTRITLVRTNEVYTLVPPNAMVHNIVIGRTWVDAYGPMTINCHTTGAKCRLDFKPCGWFGYGRYEFEGYVYDKDGVKRVKLTGKWSQYADAVRCDAEGVPLPDEPVKRLWTCAAKPVGDYYSFTTFAHKLNSSEGIRAPLPSDSRRRPDRANLAAGQMAAAGSEKVRLEEMQRAERRERDKRSDSWVPRWFRKVEQPKLYDGELEIEKVPFWEFTGDYLQLPQSEEAKAGDINGKGFAPWQYPDIHEKL

>XP_024403561.1_oxysterolbinding_proteinrelated_protein_3Alike_[Physcomitrella_patens]
MSTVVKPGGLLSSISSGISNCRSKVRSYIATEHSEVVNPDGSNVEQDETASRFKVEERESLWTQVHNYIGSDVSSLITLPVTIFEPMSMLQKMAEIMEYSYLLDKADQCEDSSMKLVYASTWAVSVYFAYARTWKPFNPILGETYEMVDKNGLTFLAEQVSHHPPMGTAHAENEHFSYDVTSKLKTKFLGNSVDVFPLGRTRVLLKKSNMVLDLVPPPTKVHNVLFGRTWVDSPGDMVMTNLTTGEKVVLYFHPCNWFGKRLGRALSFGRRKGKSQGRGRNDIDGFVYSKDGQPKMIMTGNWAKSMSYQPCNADGEPVERAQLKEIWRVADVPKGDKYQYTHFAHTINSFDSAPPTLLASDSRLRPDRYALERGDVSSAGFEKSRLEERQRAEKKLREQKRQEFVPRWFKMSGEIAPTPWGELEVYEFNGKYHKRVESSPAGHTVNVDQFRSMAFDPWQFGASGEQNVVHGSQVVPVSVEPTLLVAAS

>XP_024401005.1_oxysterolbinding_proteinrelated_protein_3Alike_[Physcomitrella_patens]
MSAPAKKGGFLSSLTSTFANFGSGAYTKVNSLLGHEGLEVVNPEGGQEDVEEEAIRGRFKQEDRESYWKMMHKYIGSDITSMVTLPVIIFEPMTTLQKMAELMEYSHLLDLADQCEDPHMKMVYACTWAVSVYPAYQRTWKPFNPILGETYEMVKHNGITFLAEQVSHHPPMSSAHAENEHFSYDITSKLRTKFLGNSVDIYPVGRTRVLLKKSNMVLDLVPPPTIVHNLIFGRTWIDSPGDMVMSNLTTGDKVILYFQPCGWFGKGRYEVDGYVYNKDEEPKILITGKWNSSLSCQPCDLEGEPLEGTELQEVWKCTEQPKGDKFQYTHFAHVINSFDTAPQGLLPSDSRLRPDRYALEMGDMSKAGSDKTSLEERQRAEKKLRESKNAEFAPRWFNLTGDKAPTPWGDLEIYEYNGKYSEHRKQEEANAAGKTVDVEQLKKIPFNPWQFEQSEGQSVAYGGQVLPVSQSS

>NP_187541.1_OSBP(oxysterol_binding_protein)related_protein_3B_[Arabidopsis_thaliana]
MAPNDPKKAVGGGGSGFFASLASSISNLGSAMTKSVNGLVPYEGLEVINPEGSTDDAEEEASRGRWKQEDRDGYWKMMQKYIGSDVTSMVTLPVIIFEPMTMLQKMAELMEYSHLLDMADKTEDPYLRMVYASSWAISVYYAFQRTWKPFNPILGETYEMANYNGVNFISEQVSHHPPMSAGHAENEHFTYDCTSKLKTKFLGNSIDVYPVGRTRVTLKRDGVVLDLVPPLTKVHNLIFGRTWVDSPGEMIMTNQTTGDKVVLYFQPCGWFGSGRYEVDGYVYNASEEPKILMTGKWNESMSYQPCDGEGEPLPGTELKEVWKLADVPKDDKYQYTHFAHKINSFDTAPKKLLPSDSRLRPDRYALEMGDMSKSGYEKSSMEERQRAEKRTREEKGQAFTPKWFDVTEEVTATPWGDLEVYQFNGKYSEHRAAADNSEDNTDPKSIQFNPWQFQDLST

>NP_001330946.1_Oxysterolbinding_family_protein_[Arabidopsis_thaliana]
MASNDPKNGGGFFASLASSITNFGSAMSKSVNGLMGYEGLEVINPEGSTDDAEEEAGRGRWKQEERDGYWKMMQKYIGSDVTSMVTLPVIIFEPMTMLQKMAELMEYSYLLDMADKTEDPYMRMVYASSWAISVYYAYQRTWKPFNPILGETYEMTNHNGINFIAEQVCHHPPMSAGHAENEHFAYDCTSKLKTKFLGNSIDVYPVGRTRVTLKRDGVVLDLVPPLTKVHNLIFGRTWVDSPGEMVMTNLTTGDKVVLYFQPCGWFGSGRYEVDGYVYNSAEEPKMLMTGKWNESLSYQPCDAEGEPLPGTELKEVLSISLL

>NP_001330945.1_Oxysterolbinding_family_protein_[Arabidopsis_thaliana]
MVFFLSLMGYEGLEVINPEGSTDDAEEEAGRGRWKQEERDGYWKMMQKYIGSDVTSMVTLPVIIFEPMTMLQKMAELMEYSYLLDMADKTEDPYMRMVYASSWAISVYYAYQRTWKPFNPILGETYEMTNHNGINFIAEQVCHHPPMSAGHAENEHFAYDCTSKLKTKFLGNSIDVYPVGRTRVTLKRDGVVLDLVPPLTKVHNLIFGRTWVDSPGEMVMTNLTTGDKVVLYFQPCGWFGSGRYEVDGYVYNSAEEPKMLMTGKWNESLSYQPCDAEGEPLPGTELKEVWKVAEAPKNDKYQYTHFAHKINSFDTAPKKLLSSDSRLRPDRYALEMGDMSKSGFEKSSLEDRQRAEKKSREEKGQKFAPKWFDETEEVTPTPWGDLEVYQFNGKYSVHRATAENSEDTTDVKLTQFNPWQFQDLSA

>NP_195830.1_Oxysterolbinding_family_protein_[Arabidopsis_thaliana]
MASNDPKNGGGFFASLASSITNFGSAMSKSVNGLMGYEGLEVINPEGSTDDAEEEAGRGRWKQEERDGYWKMMQKYIGSDVTSMVTLPVIIFEPMTMLQKMAELMEYSYLLDMADKTEDPYMRMVYASSWAISVYYAYQRTWKPFNPILGETYEMTNHNGINFIAEQVCHHPPMSAGHAENEHFAYDCTSKLKTKFLGNSIDVYPVGRTRVTLKRDGVVLDLVPPLTKVHNLIFGRTWVDSPGEMVMTNLTTGDKVVLYFQPCGWFGSGRYEVDGYVYNSAEEPKMLMTGKWNESLSYQPCDAEGEPLPGTELKEVWKVAEAPKNDKYQYTHFAHKINSFDTAPKKLLSSDSRLRPDRYALEMGDMSKSGFEKSSLEDRQRAEKKSREEKGQKFAPKWFDETEEVTPTPWGDLEVYQFNGKYSVHRATAENSEDTTDVKLTQFNPWQFQDLSA

>PPA1328002
MWNYMKSLVGGDSNLQVEENGDNKGQTPDDQEQRKGLFKQLSSYVGKDITSMISLPVWIFEPVSFLQVMSEPLQYSALLDKAVASTSPYHRLAYLAAFNCGLYSTAIRTKKPFNPILGETFEVVQDGDNGFKFIAEQVSHHPPIGVSETTTSEYTLQLETELKSKFYGNSSEVEIAGTNHFILNKTGEHYTWGHLVTSCHNIIIGYMWLDHYGDLVIENHTTGDKCVLKFAKSGWLGAGRYTVSGEIMDSEEQVRYRLVGKWNENLVLYEVMSNGQNSPNGTTIWEASKEQITSKFNFPKWLEDNVIALTPEYEKILPATDSRMRTDRRALEAGDLDTAGKQKHILEEKQREDKKARVAANQEYETKYFNKVDDADHKYRWKFNGKYWEEREERIKAASSNLNLKI

>XP_638977.1_oxysterol_binding_family_protein,_member_8_[Dictyostelium_discoideum_AX4]
MFSGALNYMKGLVGTNENLQVEESGDNKGDIEPEQRKGLLKQLSSYVGKDITSLISLPVWIFEPVSFLQVMSEPLQYNALLSKASKQDSEFLCLAYLAAFNCALYSTAVRTRKPFNPILGETFEIVDKKGEFRFLAEQVSHHPPIGVSETISEDYTLQLETLLKSKFYGNSSEVEIDGTNHFFNKKTNHHYTWNHLVTCCHNIIIGSLWLDHYGDLVIENHTTGSKAVLKFAKSGWLGAGRYGVTGEIVDCEGDVRYRITGKWNESIQLFQVMDNGSSSTTSTCLWEASKEPINNKFLFPRWVEENVIDLNDEYKKILPVTDSRLRADRIALEEGNLDVAAKEKHNLEEKQREDKRQRVAENKEWETAQFKKVDDAKFGYRWNYCGNYWEEREERVKAAASN

>PPA1345508MSFIKRKLGKKDKGGESEAPMTEAQNDEVFKNIDFGKEGEGNEPPEDKKKLWSKVSGLIGKDTMSLVSLPVYFFEPLTVLESQVEPLRFVHFIEKACTLENSMDRMVYITAFNISLFSSYVRTAKPFNPLLGETYEYIPKSGNYRTFCEQVSHHPPIGVAETSSDKFNLQQESWITTKFWGNSVDIFSIGNNHLYLNDFGDHYTWKVPQSCCHNIIIGKMWIEHHGQMTITNHKTGEKAVLNFQKSGWFDGTTRKVNGEIFDSNGRKRFLVSGRWNEYIVITKLDDHGVKFDEFTIWKAENDPAVANNKWKLGTFLQSLNEMTPEYEKILPPTDSRLRSDRRYLEMQENKIANKEKNRIEEKEREKRRERERTGQVWTPRYFKKVDDPVFGYRWLFNGEYWKERNERIRAFESQNNISSKLSSMSLTDESISTPDTATSGFSSISSNDGSMASDGFKGERKITYTTTNTNTAGHSSH

>XP_636540.1_oxysterol_binding_family_protein,_member_11_[Dictyostelium_discoideum_AX4]
MSNFFKKLVKKDGTPKSSRKSKSESPVGKYDMNGNQVVPDTASSYSDDSNSLSDSYDKRGEPNIGEQIDTLDDYNFGNEIGDAESAPEDKKSLWKKVGGLVGKDPMSLVSLPVYFFEPLTVLECQLEPLRFVELIEKASTCSDSIDRLMYLTAFNIAVFSSYTRTAKPFNPLLGETFEYIDKQGRYKSFCEQVSHHPPIGIAQTTSEIFDLQQESWITTKFWGNSLDVFSHGQNHLYLNSTGEHFTWKVPSAICHNIIFGKMWIEHYGDLIVENHNTGEKAIINFQKSGWFEGTQRKVQGEILDSKGNARVHINGKWDKYVKAKKHSEGPSRKSSGEITLWEATIEPPENFNKWKHGKWIQGLNEMSKEYQAVLPSTDSRVRMDRIYLEREENKLANKEKNKIEEREREKRKTRESRKEIWKPNYFSKREDSKYGYRWDFNGKYWDERDKRVDSVVDKFKNDPNFDSNKIPEYDDSKLNISVKSVRKFSRDFTNSSTPTQLKRSFSKLKLEEQPQSQSLPPMIKEELSSSTVDHEETFYSESNEAKLESIKEDANSHTYIYSSPTIGHSGR

>XP_005537409.1_similar_to_oxysterolbinding_protein_[Cyanidioschyzon_merolae_strain_10D]
MSFVGPKPTPTSRIRKDDSPETRSNGSSVSPVDTSPRTAPQEAQLQLPKRRDWYRIPNAASAGGVGFSDRAELERQRHVVRDMLRQVGSSFIEGKDLVNVSLPIRLFEPRSFLQRLTDDWAYCSTLLKAAAHATDTLDRFKLTIAFAIAGLHKSATMFKPFNPLLGETFQACMPSDGTRIYLEQTCHHPPVTHWRIRAADRSYEFTGFGAYSARVQLFENAIRAQRLGVNVVHFRDGSRIIFWLPYMKIHGIVFGERRLEYLGKAVFLYEPPRNFTTSGIPSRASLSDGENTEQRRSSETFAEPDRALVAVMLLNSEKTGFVGTLRGVARGIGRMFGGRNNNNSSSNNANANTNANVSKRTPVAGGRPVSYPTGRASNGAISGLDTSRPIPTDVFRGIIASVDAPQTPNAGYLAGDDSSTTPSQPGRPGQPILNAQRRKRITRRQVKQLLAEFATRNGPLASSPWSSMDWRASQDVDQVAVREQAPSLSVTDGVSDANLQRSSLSSSSLASSARNDPYRGAGRRQRSHSALDPVVLCSFEGTYLGFVDFDGQRYWDIRDMPGEAPLPVPLEEALPSDSRFREDARALAGALQPGLSEREQSDRMMKAQAAKERVENQQRADRVLRERGRRERGIKESNAFVPERILREDTCYWP

>NP_011940.1_oxysterolbinding_protein_related_protein_OSH3_[Saccharomyces_cerevisiae_S288C]
METIDIQNRSFVVRWVKCGRGDVINYQIKPLKKSIEVGIYKKLKSSVDDHASAVHIAPDTKTLLDYTTKSLLHKGSSSNIEEHHRRSSQHSHSSSNGSDNKRKERSYSSLSISGIQQQSQEIPLREKLSASGFTLVKRVGNVSGNTMVQGDLEVKDTDYYYAFILDNSSSKNAKKKILFNASVINGDNQSMISTRSTPPARPTALSRTSTQQDMLFRVGQGRYLQGYLLKKRRKRLQGFKKRFFTLDFRYGTLSYYLNDHNQTCRGEIVISLSSVSANKKDKIIIIDSGMEVWVLKATTKENWQSWVDALQTCFDDQFEDKDTSTLEENPDILDDDKEVINKSSPQDHDHLTPTATTKSALSHRQHTQKDMDDIYVPLPSESYATFSMNLRLIQQRLEQCKKDSLSYKPTTLHQRSEGLNGTHSSSSVFTNNRVSSFNHSSSGMTSSDSLASEEVPSNKTYIEHALYNQLADLEVFVSRFVTQGEVLFKDHQILCKKAKDTRVSLTSYLSENDEFFDAEEEISRGVIILPDTEDDINNIVEETPLLGKSDQNEFTKEVQLSGSEQIASSSVESYTTNDENHSRKHLKNRHKNRRRGHPHHQKTKSAQSSTETFTSKDLFALSYPKSVTRRNDIPEAAASPPSLLSFLRKNVGKDLSSIAMPVTSNEPISILQLISETFEYAPLLTKATQRPDPITFVSAFAISFLSIYRDKTRTLRKPFNPLLAETFELIREDMGFRLISEKVSHRPPVFAFFAEHLDWECSYTVTPSQKFWGKSIELNNEGILRLKFKTTGELFEWTQPTTILKNLIAGERYMEPVNEFEVHSSKGDKSHILFDKAGMFSGRSEGFKVSIIPPPSSNRKKETLAGKWTQSLANETTHETIWEVGDLVSNPKKKYGFTKFTANLNEITEIEKGNLPPTDSRLRPDIRAYEEGNVDKAEEWKLKLEQLQRERRNKGQDVEPKYFEKVSKNEWKYITGPKSYWERRKKHDWSDISQLW

>PIA13941.1_Oxysterolbinding_protein_[Coemansia_reversa_NRRL_1564]
MRRDLVRDPDFIEALAQNKLRGSTTSASARSGTAAAAAAADEVTKDVASGLDGRLVATIERVREQLDGFESRITLPAEAGEVNVSLLSILRKNVGKDLSNIAMPLTMNEPLNALQTLCEELTYSVLLQRANEMDDSLDRLMHVAAFAISALSLKKSRVERKPFNPLLGETYELVDPRSEFRFIAEKVSHHPPVMACHADAPGFRLWQDSSGRSRFWGKSIELVQTSHMHIELPRHADHFTYAKPSALVRGLLAGSRTIDFTGEITILNRSTGDRCVVLFKEGGIFSPSNDAVECRLFRAGSDHAERVLRGSWSAELLYERSPARSDVLWAAAALPPDAARFYFFSYFAMRLNELPPPPLRGELPLTDTRFRPDQRAYEEGRLEEAEELKTRLEDAQRVRNRERAAAGTSWVPLWFELREDSDSQSGHAWAYKGGYWEARARHAFPPSLPLWDDPNNSGSLIGLSN

>NP_567662.1_OSBP(oxysterol_binding_protein)related_protein_2A_[Arabidopsis_thaliana]
MRVKELHPLCCITLESPHGINSQSPEEPVTTALTRSRSLPAKSLTGGSESETVAGILYKWTNFGKGWRSRWFLLRNGILSYSKIRRPENLNLLSPDDDVRLIGDISGERLSRMDSCSGRRKQQKTVGIVHLKVSSFRESKSDDRKFYIFTATKTLHLRTDSITDRAAWLQALASTKCIFPLRSLNGDFSFIPPKDLSISTERLKKRLHEEGMNENLVKECEQIMLSEFSEMHGQVKLLHEERTNLLDALRQLEAANLEVGASGKHEFSSLGRGKYSECSTTASSDGKQEFEDVSEEDEPSFHDTKEFFNEPNIGSESNLAISGHTDIKRRTKLPDPAEKEKGVSLWSMIKDNVGKDLTRVCLPVYFNEPISSLQKCFEDLEYSYLLDRAYEHGKSGNGLLRALNVAAFAVSGYASTEGRHCKPFNPLLGETYEADFPEKGIRFFSEKVSHHPTVIACHCEGKGWKFWGDTNLRSKFWGRSIQVEPVGVLTLEFDDGEVFQWSKVTSTIYNIILGKLYCDHHGVMQIRGNRQYSCTLKFKEQSILERNPHQVNGFVEDVAGQKAATIFGKWDDSLYYVAGDGINKSKVSDPASNASLLWKRTKPPPNVTRYNLTSFAITLNELTPGLQEILPPTDSRLRPDQRHLENGEYEKANLEKQRLERRQRMSRQLQESGWRPRWFERQGESDTFKYTGGYWEARGHRNWDDCPDIFGEFTEELADAA

>NP_180659.2_OSBP(oxysterol_binding_protein)related_protein_1A_[Arabidopsis_thaliana]
MHPFCCVSDHSPSTPSFSMYAATPETPFGSARSQPVITRSVSQRYNHPGQSNHHHLLHSLSFNHQNVLALPAAAREPPVDVKINDIAGNSIAGILYKWVNYGKGWRPRWFVLQDGVLSYYKIKGPDKIVVIHETEKGSRVIGEESTRMISRNKRHAATNNTNHQLRRKPFGEVHLKVSSIRESRSDDKRFSIFTGTKRLHLRAETREDREAWIEALQAVKDMFPRMSNCELMAPTNNLDISIEKLRLRLVEEGVSESAIQDCEQITRSEFSAIQSQLLLLKQKQWLLIDTLRQLETEKVDLENTVVDETQRQAGNGDSEETISESDDDNEQFDEAEEEMDTCDSLSSSSFKSIGSVFRTSSFSSDDDGLTNGFESENDDVDPSIKTIGFNYPHVKRRKKLPDPVEKEKSVSLWSMIKDNIGKDLTKVCLPVYFNEPLSSLQKCFEDLEYSYLLDQASEWGKRGNNLMRILNVAAFAVSGYASTEGRICKPFNPMLGETYEADYPDKGLRFFSEKVSHHPMIVACHCDGTGWKFWGDSNLKSKFWGRSIQLDPIGLLTLQFDDGEIVQWSKVTTSIYNLILGKLYCDHYGTMKIEGNGEYSCKLKFKEQSMIDRNPHQVQGIVEDKNGKTVARLFGKWDESIHYVMVDQGKVNESHLLWKRNKQPENPTKYNLTRFGITLNELTPGLKEKLPPTDSRLRPDQRYLEKGEYEMGNAEKLRLEQRQRQAREMQERGWKPKWFRKEKGSETYRYIGGYWEARDSGSWDDCPDIFGQVHQSIK

>XP_024358292.1_oxysterolbinding_proteinrelated_protein_1Alike_[Physcomitrella_patens]
MHSLCCIAPVPVDKEGTEGGRDNGKMFISSCEASVPQRSLKDCQNATSFSSGNVQNIKKNNSGSRIGHSVPNMSRSMTSLPPLPRAINNGFASAGVSQGEGRVNGCERVHSNRGLPDLLPGGAGKIFTVTPEGGMKTAANFSGELFQVVDTKAGGTPQGGALTNNVVGILYKWVNYGKGWRPRLFALKEGVFSYYKVHGHDKVTVNDNRFKNFRIIGGEAQRFSKKQKYTHTNSHHQLHLHSADQNQCKASGEIHLKVSSIRYSRSDDKKFYIYTGTKTLHLRAEANADRSDWVGNLQAAKDMFPRDSLLIGLVTPSEEITISTEMLRLKLLEFGLTEEKVKECEAVMLGEFNDVKEQLKVMQQRRLTLLERLRMLEAEKVELETTVVDEMQSHGGGGLHRLKNYYGGSDTESDEDNHSHKGGVEVDSDDEDDVFFEAKETLKCSVNPPNHHSESPTHGEVNMDIVGFDYPKLSRRKSLPDPKEEERSVSLWSMIKDNIGRDLTKVCLPVYFNEPISSLQRAFEDVEYSYLLDRAAEYGKRGNSLMRLLYVGAFAVSGYSSTEGRTCKPFNPLLGETYEADYPDKGLRFCSEKVSHHPMIVACHCEGRGWTFWGDSNLKSKFWGRSIQVDPVGILTLKFDDGEVFQWTKVTTSIYNLILGKLYVDHYGTMRIQGNRDLSIKLKFKEQSIIDRNPHQVQGFVHDKSGTKIATLFGKWDESMYYVMGDISEKPKHYDPMSEAVLLWRAAAPPEKLTRYGLTGFSITLNEITPGLREKLPPTDSRLRPDQRHLENGEYDAANSEKLRLEQKQRRARTLQEKGWQPRWFRKGKGKDTFEYIGGYWEARDSGSWDGCPDIFGPDSMDENGLTD

>KXN69690.1_hypothetical_protein_CONCODRAFT_50421_[Conidiobolus_coronatus_NRRL_28638]
MSYPFTQLYDLGPSQKHFHRFHIKKPDSTICYTFGTSPSPITLTYGLYLEPEVIIPDTPLSTQSGQHPLSPGSIANTDYFNTPQPSSKFSLKNGSQSSLTLKDINEAYQEPATPSFKLLNSPAFSPQPKPLATEINTNELIEILPLSTMESTGQVKGKILVDKIGYYRMFFSNESPNQRCQIDVKISVESVPKNQTDLQVTEISGWLLKKKKKKMQGWAKRWCNIKLGVLSYSKTENGPSRGSVQLHQSVFSISPKTLSINIDSGSELFRFKYFTREDFDRWIHAIRLNVDNASQQLMEFPSRGSLANRREDLAVLAIERSLSIRQSVINNGETSNLLAEDNGPEIQSKIHHLQETLANVLSQLNSQGTLTSTPMGQSSSQQSTSSEASKTSNQRTKFISFRTKRDTVTTNGGSSAGSGSNDNLDFIKNNLKNLVQSALHDVNWLDENLQKELDIKRKLELQYLNAVGNMSNSGNSRASSPFVSNSRTSSSNALPEHIQITTLSNGSRTNGHRSRRSRFLSTASIDTTGADEEFFDAIDIDEQESIQSPIDIRFNDDSPTFPEDDDDVANPVIIDENDDDDEDSPNESMSTPSLVLSPKKSQSSKPFTRRSALPAPTNANDVNFLSFLRKNIGKDLSTISMPVSFNEPLSILQKMCEEFEYSEYLDRALNSTSSMDRLLMVTAFAFSAYASSGYRAERKPFNPLLGETYENYRPDKGFRYLSEKVSHNPLIFACHCTSIEPGWEVWGEARPKSKFWGKSMELNSLGTTHITFKNSLSGSDKPDHFVYNKSVTWMRNIVGGTKYIEQAGEVKITNLTTGEFAKIVFKESTLWTSSNQEAKATLHDSKGNVIHKLTGQWNNNLMVEKSKDNLEIIWKAKPLPSNADSMYCFTSFAMELNEITPDIEGKLPITDSRLRPDQRLYEEGKVELAESEKVRLEEGQRARRRDREGKGEVYQPSWFKLKTQTDHEKQNEEAYIYEGGYWEVRDEEKFTNLTQIF

>EPZ35907.1_NAD(P)binding_domaincontaining_protein_[Rozella_allomycis_CSF55]
MQEVDVPKRDCFKYYVTADSKDLTLYWNFSTRKNGIAFGLYYRKSSYVLGQGEYDQYFKENNDKELEQFFLSSLKDFTIQPPAKLGSSSSNVAGRARKFSKNQKIGNEEGDADKSHPVVRLRASSNSSRKDSVSSMDGPIISDVDEDLICVSTLARYDSAKFTIKGSYKVPMPGVGWLLKKKNKKLQGFAKRWFQLEGEVLSYFSDPNRGSVDLKTCAVSRIPENNMIIIDSGTLLLQLRAVSAEDYTKWSRAINISRYSKSYRKSSSQESMINDKENGMTEEEKFLVQFKAENENLNKMHFEIADKIKQTKKTMKEKVVSKNDIDEISETFEGCFAKCSAIMTQQELSFQNYASVCKMKKERLENEYLDLMDDLNHEHRLSVEKRNRSQSKASSFTMDEVFYDAEDKQEDYFDEISDISEIKIQDVDDDDDSDSNESFKENNQIIENGLISRRKVLPSKICGGEISILGILRRNMGKDMSQISMPISTNEPLSLLQRISEDFEYLSLIFKAIEASDSIQRLAYIAAFVVSSYSSSFNRTTRKPFNPLLGETFVLDRPDLNLRYFAEKVSHRPVIVAFNVSHPKFKIWGSIQPKTTFWGKSLELINMGTIHCKFFDTLDYFTWTKVKSKVKNLLAGTKYLEHVGNCTILNHKTNESCELEFIESGYFKGSCSCKYLYFTKILACEVKGTIYESEKKIVCNLKGKWNDSFYKQIDSDKLELLWQTNPFPPENAEYYGFSQFTMQLNEITPDIQNKLPATDSRLRPDQRKMEEGNIVEAEEEKQRLEEKQRSKRKEMEELGIVWKPRWFNVNFDEVTNQHDFVFNEKFWEMFDKGEYVLGHEAMSKMSQSDVLIIGLKGLGIEIVCEWSVAKNVVLAGVKSVTIYDKGVVKPEDLAAQFFLHESDYGKRRDEASVGKLAELNSYVPVHVLDGEFSVEMVERFQCVVLTEGSLRELVEINEYTHARGIGFIAADVRGLFGFTFCDFGREFEVIDTNGKDAESGMVAGVSREADGIVTCLEESRHGLEDGDYVTFSEVKGMQELNGCEPRRVKVHGPFTFSIGDTRNLSEYVSGGIFQQVKQPKTISFKSFRESFKDPEFVISDFSKFDRPMMIHLGFIGLKKYEEENKRLPRPRNEEDAKELIRIVESMIKEEGMSVEIEQGIIKEMSFESRGYISAMSGFLGGIVAQEVLKCCSGKFYPIYQYFYFDSIESLPKNYELNEEECSSENDRYSPMINLYGRKFHEKVENVKAFLVGSGAIGCEMLKNWGMMGIGSGKEGLIYLTDMDSIEKSNLNRQFLFRPWDVSKSKSMTAAKAVKEMNKDIKIECFQDRVGIETENIFNDEFFEGLDVVTNALDNVDARKYVDRRCVYYRKPLLESGTLGTKGNTQVVVPFLTESYSSSQDPPEKSIPMCTLKNFPNQIEHTIQWGRDIFEGLFTNLAENVNQYLSFNDYLENLTKQGNLPLEAVVGLESCLVSEKPINFEQCVIWARNKFEEYFSNNIKQLLFNFPPDSLNSSGTPFWSGPKRCPKPLKFDLNNKDHLDFIIFASNLRAQNFGLKGSLDLNYFKEIVNKIKVEEFIPKSGVKIQVENNENSNENVNLNIDVDSLIKSLPLPNSLPGYKMQRIDFEKDDDSNFHIDFITATSNLRASCYDIPPADKHKTKFIAGKIIPAIATTTALVSGLICLELLKIIDGNRKIDDYKNGFINLSLPLFTFSEPIAAPKLKYNDIEWTLWDRFDINGDITLSQLIDIFKSQHSLSITMVSCNVSMLYSFFMNKKKLEERMNIPISQLVESITKTPIPAHVKDIILEVCVNDANDDDVEVPYVKIRIRP

>XP_025186148.1_Oxysterolbinding_proteindomaincontaining_protein_[Rhizophagus_irregularis_DAOM_181602=DAOM_197198]
MQGWAKRWVQIDNGVLSYYAHPHGPCRGTIYIALSAVSSNANFCSINLDSGTATYHLKALTNEDFDGWMKIIRKYVNISKELQLNDPEYPKMTSPRQSTDFERRQSMYIKRQSLLLDRRNSLHRDPQSFFRLNNKLDEDLGKIYGIFNSMDNGFKDIKEILDYFKNSVENITSPGRQSPNVEGKFRLKKFPLSLQRGSTTLEQSSSSQTSIPMSLDQIYEKLYTTFSTLKTDKEQAFEFLRGEIERWKQLDNAYRKLVVEHAELRKILSDRQLTDVPEQMQQEVLLSEKSSTEDIGEIRNNRAGSFSTVNTGSAEVFFDAEDIELKDTTDSDNEIIEDETEDEAVTDGSITEETTEEKSIDDDNIDDKSNINRSTIIRRRKCLPSPVCGEDVSLLSILRKNVGKDLSTIAMPISLNEPLNALQRMAEELEYSDLLDKAATFDDSITRLIYVSAFAVSGYAFTQYRALRKPFNPLHGETFELVRPDKGFKFISEKVSHYPPIMACHAESSNWQFWQDTKAKTKFWGKSMEIIPSGTIHVTIPKYNDHFTFSKTTTWMRNMISGTKYLEHTGVMKIQNQTTGEACDVTFNQSGLWSSGPKSEIVGALYNAKGGKCGKIVGRWTEIIFHEIGQNQLEVIWKANPPIPEHEQYYGFSQFAVELNELTPDLVDVLPNTDTRFRSDQRLFEEGHLEKAEAEKLRVEQKQRDFRKYLEKEGKSWEPQWFKFENGEWVYKGGYWETRENKSFETKVDLW

>XP_016603924.1_hypothetical_protein_SPPG_08747_[Spizellomyces_punctatus_DAOM_BR117]
MQEVTIRQRSAFKHFVNVDQPGKELCWNFFTRRKNISFGLYRKVNRAYTETGTYVLQSGTLREVGKSFVVVGSDGDEKTSTPSSPLVPRSKGTTSAVTPPEFAEYPPSLGALKDNASAKSFSESTEGSASGRRRKKESFIDPELVEIMPVTHYDSSKFTVKGSFYIEEPGIYVLLWDNTFSMNTSKKLFFFVALKDVEPSQAPVRKEMENWLLKKGNKKMQGFQKRWVTVDTNGTLSYYKHPGSFCRGSVELPKAAVHLDHDRSLIDIDSGQALYHFKAQSPQDFQAWISVLQRFTLAKTMSLGRESESGGKLIPDDDDTGSPWDGTAKGAMDPDLGDVQRKAENMVITLTNELGRLKELVESSRGRMDQRSQMKDFTLILNSISDVIANALSNANNMQRELYSYGETVRSQRERSHDAIQQTESALHACLADNNRVRRRFGLEPVTLTSFIAHASTTSLHLNNFHKAGSITSSMRDDVFYDAEEGGDSDDEESAESDSMHEAEEGLSSDEEFEDDDEGSNESFTPNRRSRQASTASTSGGATSEATVTQTIPPAKDETSKVAMPIQPLPIVRRTKLPAPTVSMQNISIMGILRNNVGKDLSTVAMPIALNEPLNLLQKLCEELEYCELLDQAASITDPVDRLALIAAFAVSGYASTIHRAGRKPFNPLLGETYECVREDKGFKFVSEKVSHHPPVMACHAESPNYIFFQDSQVKTKFWGKSMELIPTGTVHVAFPALGEHYTWTKVTTCMRNVFSSGRYLEHYGTMKIISHSSGHYCELSFKESGYFASAKNEVVGTICGPKGQKLMSLSGNWDKSLQKFHESAPNALEVVWRARPNPPNHPEIYGFTSFALELNELTPDLEGLLPNTDTRYRPDQRMYEEGRDEEAEREKQRLEQKQRDYRKMLESRGEQWHPQWFDLRPEEYSNGNRSWHYKGGYWESRGKFENVLDLWSSQSF

>XP_006677097.1_uncharacterized_protein_BATDEDRAFT_3220,_partial_[Batrachochytrium_dendrobatidis_JAM81]
IKRRVKLPAPACSMQNVSILSILRNNVGKDLSTVTMPIVLNEPISLLQKLCEELEYSDLLDTAAHTTDPVDRLCYIAGFVVSGYSSTVYRAARKPFNPLLGETFEFIRPDKGFKFVSEKVSHHPPVMACYAESKNYRIFQDSLLKTKFWGKSMELNNTGTVHLEFPALNEEYVWSKVTTSMRNLFAPSRYLEHHGIMKISSLTTGYCCELTFKESGYFTSANNEVVGAVFNPRGQKVISLCGKWDHSFNKFLDSAPDKLQVIWRASPFPSDQADNYGFTQFAVELNEITPDIVNMLPSTDVRYRPDQRMYEEGKAEQAEEEKLRLEQKQRETRKAMEASGKQWTPQWFELQPDEHSEGGRAWRYKGGYFEQR

>XP_012051423.1_oxysterolbinding_protein_[Cryptococcus_neoformans_var._grubii_H99]
MSTPMPITPRKASSEKTSKLSTSTSSNPNLSSSAPPSALYNFRLLSALRSEDASEVQQFLNQLKAAGGAEEQIEKAGQLLGMAVRVASIPVITLILNSPNVPSPNLPTSTGTSSTPLHVASELGRVDIVQLLLSDPRIDDTIKDDRARTPLECAASPEVASVIEESRAQLQSKYVALLSRYVSSPLNSPGESAALAEFLDLPRVGVVNLNALDGRTGTSLLHEAARRRDLRLVELAVKKGADVFVRDKRNKRVLDGEKNADDRIKMFLRQFNNQDSLVEAKSDGRPPDHRGFLSKWVNYRSGWRTRWFVLENGVLSYYRDREDEAIACRGSIAMAVATLHTSSDGTRFELSSKVSSAVPKFIVKSVHRAEIARWVQTIKLNIEYYQNGPGVEGQGSGPPLPRRSASLKVHDKAATAVNSLPPSDQFLSPTLQRTATSLSGASIGSVKPPSESSNIRITGTHPESLAYEKDDSDHSEDEDQPSTEVIPYENAYELGVLNIKEQIDLTLQLVDSIVVPPSASPPSSDRGTSISARQAAVKDALRQSLSTMSSLVLKQNAMSHDRERYFTSRIQREIQARQLWEENMLTIAKQQAEFEQQLNDAAKVNEKKKKALRQAKGVLAGLSGVSMPTSPAELGEQRASIDQGILEPPPTTGTGETLSSPFKTTFTSAGPPISSTTPTAPSGLLSPPSIPNIKEAHDAIVAAESGDEDDDTDEFFDAIEQNQLPNLKLYDSIAHPERELPGTPVTPGTPGIGRRVGVVTGASGEAEEDVVHGSELVRQQSVPAKGTIEEYLARESLEPYLHVRHKLPIDDDKRPSVSLWSILKSSVGKDLTKISFPVSFNECTSMLQRMAEDMEYDACLTVAASEKDSLRRIAFVGAFAMSNYSSTIGRIAKPFNPLLSQSFEYAIPNRYRYISEQVSHHPPISACYSEAPKWKYYGEVDAQNKFQGRSFEIRPTGVAHAELIIPREWVNPSLEYPDAGPEYGPGLVKEHYSWKKVTTNVSNFIMGSPIIDHYGDLVVTNHRTGETCTLTFKPRGWRGRDAFEIKGNVKDADDNVKWDIAGRWDTQLIAREASAETLPLESDMSVNQAQKEYILLWRNSEKPKAPFNLTPFAITLNDIPKGLGEYLCPTDCRLRTDQRAFENAEYDRAQGLKTLNEEKQRNTRKLRAEGKLPPHEPRWFNATVDDDTCERLWEPKRAENGEVAFWSVREKKNWDAAGVEHIFASDQK

>XP_011388389.1_hypothetical_protein_UMAG_11568_[Ustilago_maydis_521]
MTHASNGSLTSGDDVAEAVYSFKLLEALRKGDQQALIPLLQSNTKSANLLAKESTSPLHLAVRCADFNIISFLLNYKTIHLNATEAQNGNTALHIASASGRDDIVQLLLDQQDIDDTKPNKDGRDALAVAKSPEIAQRIQVSRAQLNAKYLDHLDAYEQDVSRADANIHDLLNLPRHAVIDLNAHSTNGSTLLHEAVKRKDMRMIETAVRKGADVYARDRLGKRVNDVTKDERVRALLRQLHNADAAKASQASQSGQPPCFKGYLGKWTNIAHGYKTRWFVLEDGILSYYHNQDDEGKQSRGAINMRYAKIRADNNDKHRFEIISETGKGTSKLYLRGTHPVERARWVQVLQQTKEFFNLERQSSRATEHFYRQRAPSTSSLSFTHSIQTSTALANPAAIVRPSSTAPSEKGSRTGFLSLKSPSTQPPSGTASERSLPLLNRSPSLLSRPSSDERGEDEAGAAGAAAARLPYDNEFRLTAEALKAQAEASQRLVETLIASNALVTASDSGSTAKHSRTLSSSNGSNPDTVHSALDAAIRSNLQLVERYQTMVAAREAYMAKRYERELQIKHLWEENMAVLAQQHAEMETQLKEAAAENARRRKALREVRETMGSSPGSILSPGGVGGALATSSYVASPLHAHDQRRQSTLQSYEMADSGGAGSLAARRLGEEGGAQLQLDDQLTPPIQAQRSTILGIADEKSMARDSMDDAEDDFFDAIETGDLPGLKVEQALSQPETDLDQWPDRFDTEVIDEVVKTSLEPYRHLRTELPIGKDDRPSVSLWAILKNNIGKDLSKITFPVSFNEPTSMLQRMAEDMEFSECLDAASMQEDSTKRIAYVAAFAMSNYSSTIGRIAKPFNPLLGETFEYMRPDKKYRYFSEQVSHHPPISACLAQSPTWDYMGCVDAKSKFLGRTFEIRPTGVAHVNLKVPRKWVKTNKELTTAPMLSGDHVLEHYSWNKVTTSVSGFIVGNPTIDHFGDMEVTNHATGDRCVLTFKPRGWRGKDAFEIRGSVLDAQGTLRWDIAGRWNSQLVARKCGAGSGDLNPDESVDAPDGQIATAQPLAEYLLLWRNSEKPASPFNLTPFAITLNSCPDELRPWLAPTDCRLRPDLSAFESGKFDQANELKQKLENFQRETRRMRETGELPPHEPRWFKRTTDADTREQLWQPLAAAPGSGANGKEATSYWAERYQVGSKKANGIHAEWSNVYHIFGDFEVR

>Contig20649.0.g19|Oxysterolbinding_protein
MEGYLGKYKNFVSGYKKCYCRLEMQQFVILKGDQTSQMKVALHLRNAKVEVNPSQSKDFILTVDLNHTQQQFQSDQQSHDQAQANAVTTPRNQKLQKLYFQAKDPRDKDAWVKCLNQSIVLANQVQDYQKNNNNNGYSGNGHNSHIDKKLRIHHLGNKAIESHRDNLYEAFSSTLFIDECGINNQLSAFNEVESLFKTDMEVLLDMVKSTIDDEKSSPLIKKITGLKNLSKTMSSLIKNIVSEIDNTREQMFRILESYAAIEISNNPKQFNKKQQKISKSKQQLARNQNELALTKRFSIDDSSMSEKNHSKEAHNFNHKSSDHLFMFEEEEKSPNLMMGRSSAGQIQYSQSNGSQMDDSEVQFGIYEEEEIFQDASEEFIYQDQQVVKATRYFIQDLTDERISLPHMRNPNLKVSFWQVMKDLIGKDLTKVSMPIYFNEPISLGQRMAETVEYNYLLEQAAVEPNSLMRMALVATYTTTRYSSVIGRMQKPFNSLLGETFELVTQKYRYFSEQVCHHPPINAFHCENSFYEVFSQASTSMRFNGRSVLFAPKDRVYIKLKLKDGSQELYSVNLPATSVHNLIIGKIYVDVAGKSQVINHTTQETCDIELKEKGWSGKNANALVGIVKTSSGKPSFRIEGRYTQSLSIVDLSVKDAQPQEVWKITPKPEKSDWMYQYGHFTLQLNYLNDALQEKLPPTDSRLRPDQRALENGETELAIKEKHRLEEAQRARRRQMDKDKFHYEPFYFEKKLIEATGETIFQINGKYWEDRDKKDWSKLVRIFE

>Contig21715.0.g119|Oxysterolbinding_protein
MYAYIKSNSFTIQKDKQDKEQRLKLALSTLTVEGNAKDQTEFFVNYMDQNKKPQKLSLKAQDQKERDKWLQTLQDFINKVNLDIDIFSQDDPLVQPFKDNLYEAFSSRFFVDECDLDTKMQAYNEVEKMFSSEIDNLQDMVKATVEEEKGNQITRKIVNVKNLCKTMGDLIKNIVNEIDSSREQMFRILESIAVLEISRDAKKFNIEKIKHSKINNNKTGAGVSTTNQQKPSKKSNLLIKNLGDLRDNSHTKLNSSRSTGGGGGNHSYNYSQGDGSGGTNDRLRKDFRMSSDVVSQTNIFSSRNKKQFSSLSSSSSQYKNQPTEIQDLSSFPYAMDFDEEEKHSDTSSVRSGYYKGRESSADETEFEFGIDDEEDIFLDARDEIIVQNQQLVKQSKIFIQDVFEERLSLPHLRPPNQKISFWQVFKDLVGKDLTRVSMPVYFNEPLSLNQKLAETVEYNDLLERAAQEPNSLIRLALITAYTATRYTNVNGRMNKPFNSLLGETYELVTTKYRFVSEQVSHHPPITAYHCENNFYEIYAQTRTTMRFNGKYVLFAPKDRVYINLKLIDGTTEFYSSTLPMTSVHNLIIGKLYIDVHGKTSVINHTTQETCEVEWKERGWSGKNANIMNAIVKTPSGKALFKVHGRFTDSLNLVNLDTNEESEIWRASPKPEQADHMYEFTQFALQLNYLPDSLIDKLPHSDSRFRPDQRALENGNTENAIKEKHRLEEAQRQRRKDNELVGKKHAPVYFDEKLIEATNDRVFKFNGRYWEDRDKKDWSNITKIFD

>XP_627892.1_oxysterol_binding_protein,_partial_[Cryptosporidium_parvum_Iowa_II]
NNSVEVNHMNRIRRKISRYVHRKPKGFRTEEILERNTDITQEIDVNKHISLLENIEIETNTGERRSKSLSSSNLLEEVHIVSNEAETTTVIEEVDNLISSSSIIESSNSNSLIEKNKVMKTNSEESFVSIKESEDELSVERLNTTKTCVENEDIEKEETCNITRRRNLPVPKTSAKFSLLSMMRQVFGKDLSRISMPICLNEPLSFIQRLSEDLEYHDLLKKASNSKSVDERVAYITVFASSAISSTFLRLSKPFNPLLGETFELTHRGFKFIAEQVMHHPPVAAYHAESDDGSWVYWGTVWSTMSFGPNSLSILPQGTVHLKIRTADGEEEYSWERPNCIIHNIIFGSTWLEWLGDVNVTSKNHGYRGKTSFFSDSNNSYSLNKYNSSLENSKRGKRRNIVTGSVYNEDNQRLFCIEGQSDQEIQISSTKSQNDSFHPYSKSNVVWRCNPHPNNGDNSHNFFLTYMALELNEISDDYNPEKGANIPITDSRFRPDQRLYESGDVDGAQIIKGLLEEKQRKREKTGNSAVPRWFAKGKRLSSSVLNAKNSSVSKDVVEYEWDFTHEYWNYKNSQNFSNLNDIIDIFNIDK

>XP_001347998.1_oxysterolbinding_protein,_putative_[Plasmodium_falciparum_3D7]
MIGGKYLNIKIFGEKRNSLGSNKTSDNTINNNNVNYIKRKKNNNKKDQEKKYNDNNYEEEYIKKRKSKPGSLYNNIDKSKIYRDKKIIHEGWLNKWTNIIGSYRPRYFILENGLLRYSLDKYSPTKESFVLTHCKIKVCPDDQLHFEIDTNEQGVLYLKANSPEDKHKWYISFKKAQLNYINGNNYKNKNGHHNIPDAVQTFNMSNNSLFLKNIIKNSSKCIKREDQHLDDPIKNTNNQTKKELSNNNKEIIEKEKNVDCIIVNKIQENVKGDESNNIVKNVIYERDDKDVPYERKDICMSHDKNYRSPLYIDNDNMSSYSKINKNANIKYKSNEYIFYKDDNVEKLSSSSSSTLDTSEFIEKMNSYNKKYNLEDMFISSTDFEDKSPTLCLMKNIISLKEMTTDVLKGSEYYQARSILNKKLKNNIKKGVNSNIIVDVNNNIIVDVNNNIIGDVNNNIIVDVNNNIIGDVNNNIIGDVNNNMIGDVNNNIIVDVNNNMIGDVNNNMIGDVNNNMIGDANDYVNNNFSNGNNLQIKSDELLSLLSQLYFSIQYAHIIIEKYIQCTELLLKEESIHSKYMNQSLKLLAKQNYYLEKSQEINNLTHMEEEIKDKLKHFQLYQCATLSEEDEEEEDKEMYNSSKQIKQKKQQQEDLFYDCDEFIYDKNILSNDVFEDESKNSISLYSSEGDKNENSDKIKKVHNTNNIPDQNRTYNNEHMLTTHSTINNKNEKMNAHIDEHYYNYINNDQENEKTFSHQTSEQRSLNIKTKSSDHDDNITTIQEDCTTDVFLKTILNNKNINETKRNTVSTEDDIALGDVRDGLITCDVYKKDHFVCDDSVEDKDIIRKRMGIEDDHGNNEDVHGNNEDVHGNNEDVHGNNEDVHGNNKDVHNNNKDDHNNNDNICVKDTSKNKTIYRDNHKCDICPCDNHLYDKNNLDNHLKSINFSLIPSCNSKNIKALNFKDIEIYTDKSIKRRKKLPSPRTEIKISMWSLLKDCIGKDLSRIGMPIYLNEPSSFLQRLAEDFQYIYLLKYASNEKESTSRLAFVTAFTISPYASVIGRTYKPFNPLLGETYELTHRKFRFISEQVVHHPPITAYHCHNEYMENYASIMANVHILGKSVEVTMPGSSHLILKYKKTMMSQNNLEKKINNYIHNNIHNNIHNNKVKEGNTESNMINNYNFCGKKKHTHDTYIHTDGMSNDINSKNDTSEQIQNELLNDNMQSEENGNNCMPPIRKEFYKDRGTCKNTKDGDNNDGHNNDDNNDDDNNDDDNNDDDNNDGHNNDDNNDDDNDGHNNGHNNCHNNGHNNDDHLLYDQEHYTYERANMIIHNVIFGKLWVELHGNIIIRNHNNGDFSIVKYIRKGWFEKEIHNVRGVVCDRYKNIIFFIYGKWSQEIYIAYVKDMKKLEYDNYFFNEDGSENIYHYNKNTLNEFINTIDWQLYENNIENLNSICVWKAHKRPHNSEQYYGFNYMTVELNEITKEYDKDKGAAIACTDSRFRPDQRYYENGNIEVAMNEKQRLENKQRQNAKKFNNTNKYEPKWFYKHKDPIFNDRDIYLFNNKYWITKDKNQFSDTPDIF

>XP_625846.1_oxysterol_binding_protein_1Alike_pleckstrin_homology_(PH)_domain_containing_protein_[Cryptosporidium_parvum_Iowa_II]
MLVNEQSKKINDRLGSLPYNWKIMSDAPELFNLPTNKYEELGKLNKSTLRKKNQLCSNINVNKADHSKAFVQENKNIVSQLSKAMNKDHSNEYEQPIIEGWLHKWTNMVNTWKPRYFRLYPGILCYIKGSKIRKINIPNKSCYIDIYSSKCNRISLRYPSDSNSDLHLKACSLESKLAWINSLIYSMNAKALFGKELFFNKINSHNSSISYKDSLNIRNIPFLTNLLYELIKTRNLILDEISEKRVKSSKNNITKYFDKLIDTVFEKTCNINLVKLHECDIYSSLFSLINTEEDIGKISIKSNRDLHASESTEEIFYDAFSDFENDTESEKILNTPNIFPKKDECYCCFWKKNPYKYRMTLPFLQQKPRFNLWASIKESITKDISRITIPIQFNEPTSLLQRLAEDFRYSSILENASLYDSSIDRLREITIFSITPYVSSIGRIFKPFNPLLGETFEFSHRGFRFIAEQVGHHPPTTAFYVEHHPTNINDKIPKIGHTNNPLYSVWGQVGNKSRFTGQSLELTVIGNVNVILNDKGDNYTFNRPKLLIHNIIFGKLWIEIVGISTIINRKTLEFSLIEYQKGGWFSNDLFNIKGLVFNKYGKPIYKIGGKWDTKIWYESCKFDQEFTKENIFIKSNLESEKVIKQRENYKLYGESVETSSNIIPTSCLYLLSIWDKIESIPSTRKTAWVAEAKPFQSEKFFGFAEMTFELNEISPQYDINIPGVNMPCTDSRYRPDQRAYENGHIEWAVKEKRRLEEKQRASAKKRLNGEADYSPKWFFKELDDSTGKFNWKFNHKYWAHKDQQIEFTDLPNIF

>XP_009496364.1_hypothetical_protein_H696_04212_[Fonticula_alba]
METVDIPKRSVYRMTVPVNGPNRCMLIWKFSIARKCIGFSITRQRATDKVFTEVLPMSRTDGHEGSLIIDEPAVYLFVFNNSFSKITTKRLSFIVEVRKLPELMAGAGLLPGSPSASVAGQISAELEVPAEQSPLPGTGASAELAAAEAGASHSTATSVKTNSGTVAATSASSSPTPQQLPLRLQGTTQGAESEDIEVCGWVLKRKRQKGIHAWSKRWLTLRSGGLLSYHKTPSSNCRGIFALSCAYVSANAPSRQLIVDTGNSVLRIRVPESAEFLKWVRALSRYRAVRGADHPMLRDAVADVTPSAGEPAKPHLATADGAGLGAGAGVVIPGGVGAVAPGAPSKIDDVHFDLEVARVKLDVADDALSFASGLLLAHQAVLGPAAAAALSRVVADGHHHGGDSDSSDDDESEPSLSADLASPTMAIAGVGASASGPLAGSPEDALVRLLDALQALRSAYSLLSLSERSLAQHLPASGTSGVLLTGSGRLPSVAPVVATDPRFLADSDEDFFDAQEASDSDSSDDDMDLGAGESVDVVNRVVIPQAATAPAAAAATALTPAPAGLRPTGMTTSVPRLARKTLLVPSPAEVPDVGLFGLLRKSLGKDMSRISMPVVLNEPLNVMQNLCEDLEYAALLNQAASSDNPLRRLALVSAFAVSSYARTAVRFNRKPFNPLLGETFEFVQPAGPGPAGPGFRFFSEKVSHHPFIVATHCSSINYTMWQDLRPTQKFGGRSIEMSYGGTVFLDLHVAAGPGGAPVTERYSWERVTSTLRNALSANRSIEHHGTMVVASELATGRAVAEIEFVAASGGGFWGGGASASANKNEVTGQLSVPGCPAGTLSGRWDESLQFSAPQLANGEVIWRATPPPANHLQQFGFSEFAVGLNDPNQCPELLPRTDTRFRTDQRMLEECQFEEAEVEKDRLENRQRAAREQAMAELGTTSPPTWNPRWFQTDEAGRFAFTGEYWTVRDGAGGFSGEDLPDLYSDGPVSYRT

>XP_005819357.1_hypothetical_protein_GUITHDRAFT_121455_[Guillardia_theta_CCMP2712]
MNLPSHGLREVSFKDGTTIEIGFPDNRINNLFWGDMHHEVLGSQLFVDARNGLRARLQFSPPGRKGLPSDYFEGVIERFDPAKPRGGGAGGVDDRGVRYWDFRTFSKATSSSPPALLPSDSRLRPDRNALVEKNIKLAQAEKLRLEEEQRQQRKLREQKK

>NP_593405.2_putative_sterol_binding_ankyrin_repeat_protein_[Schizosaccharomyces_pombe]
METVEIRSKSLLIQWLTVESNSLLSWQLHVKRKSIKFDIYHKKNDTSSLLDGSNKNTDRSILHTKRQHTHEAGIKKLSAAGLELFYQGERCMSEKPSEGSVYIENGGLYAFVFDNTFSKTKPKTVTFLLTAQPYNGPRIPNASVHGSPKQIISGTLLKKRRKKGQGYARRYFTLNMVEGTISYYANENSSVMRGKIPLSIAVISVAAETHEINVDSGVELWNLRAHTHQDWLRWCNALEKAKNSQTSSKLVVDERTQESSSNQLVSIYSRLRECLDIAQLYRTSRIKSASSHNFSVPEIRIQLPGDAKENKETRTSVEITAAENAQAAVTLRKVTRQLGSLLHELECFIQHHEYTKERTAQSSPSSRMSMDSNFEQHWYDAEDYESTTSQLNHYSESGAHAADATKSSVAHNEKVEDISDSDIPIMKTSSNSTSLDADRDSDTSSISDTSSNSSAPHEQLNATSLASTVDESSRSPPLPEVESNKENDIKRKQPFHDLMDSSSPDDSSFANAKSDEEVQKPSVSKNIADGAVISIPKPLTPKPSDSNSLYPLPHSKVGRRKNIPAITVPPPSILSILRKNIGKDISSIPAPVVSNEPCNLLQRCAEDLEYSNMLDKANECDDDIKIFYVAAFAVSNFSNMRHKERSVRKVFSPLLGETFELVREDRNYRFLAEKVCHRPLIIACHAESRNWIWNHSPKPIQKFWGKSVELNTLGPVTIKLACGTEFSFMKPACFLKNVAIGEKYVEPYDHMEIVDETTGDKAVIRFKSGGMFSGRSEDVLVTVIRSNGEEDPKCLQGKWTSHLDFVNTDEGNVIERIWEVGPLVDKPEDHCGMTVFAAQMNEITDLEKDKLPPTDTRLRPDQRYRENNDLDHAEPLKLELEQKQRERRKEMEEKDIKWEPRWFVPSVAGDDEDEDGSGPIWQLKKENNYWESRENSTWSSCPKLW

>Contig4882.0.g92|Oxysterolbinding_protein
MEGYLFKKDGFFSGWVRYYFILHEDTLIYLDKEGGKPQGSIHMKISKISGDQKDKLLIMIFNGTNEIYLRANSIKEKVDWTNALVNCQKQCMDGRYDQFKPKKQKSTAQIIVGSPLREKGREQNSDFSNGGMSNEKPSKVGGANWNETLNLAFCSKMFKPDGTFFSRLSQIWELEAQVEELVSLLIPEADKTRNKIIKDYVQKIAQASELIKEKMTECVQELEETRKQMFKVAKTIVQMKDDMINTGKLNVNMQMKGSNMSNMSSPNKQNPNNYSVSINSPIRGLQDQLMQTSTSNLNGPNPQQDYHSSNPNYQQSIFAEDRSNYNGFNQTQNLNGKLAPGQGYSNSYQDNPNYQSSPNLYGGAAAVAGSGQNYQSNELINQDFQNKYQQNMNQRDQIFARASNKIQFDEEEDKFQDSNQQNMIVPIQRSSLDSNNAGLMMGYGGIPISYTMKMRDSLPALIPENQSYSIWAILKSAVGKDLSKVTMPIWLNEPISMLQKISELMHYHNVIEKGMTIQDDCKKLGYIAIFLMTQYSDVYQRNRKPFNPILGETFEMIQPTYRYFSEQVSHHPPISAFYGEGKGYYTYGNTNVKNFFWGGSLEFRAVGLQHMVLTDTNEHIIIKRPDNSANNLVVGKLYVDVHGKMEVTNVTKGIKVVLTIHRQGWTNKNAYKVEGNVIDQNGKAQFAINGLWNEKYSIKDLKTGQEDLVFKADPKPALSERMYGFGYYTINLNFIDEHMRRTLPPTDTRRRMDQRYMEEGDYDKAADEKHRLEEQQRAVRKQRESSQVMYKPAYFKEVDDEHCGEKAYVYIGNYWEKRKNMDYFDCPSLF

>NP_506695.2_Oxysterolbinding_protein_[Caenorhabditis_elegans]
MVKLFREKKDMGSPKIQNFKRQTVLHKGQRTRLPATYIAPEDVSIWDIIRPNLGKDFSRFTVPVFMNEPLSFLQRLSENVQYNYLLEKAAKCSDDMERIEYVAAFALATVSANHKRLSKPFNPLLLETFELERNGVRFLAEQVSHHPPISAVYAESDEFTVEGTVEPTLGFWMTKLLANPHAHLKLTFKKTGETYSWSAPKCAIYNVIMGKMYMNFTSHMKIESSGTYDAVFSFDNKGYYNHKGGDVHVEGHIFEGKNKIKALYGNWTLFLASCDNEDFKHHRKEYLRMFNETVSEKDQGPVVPGSKILWVSNQIPKLFDDQFHFTNFTLSLNEMYPGMSDTVAPTDSRRRKDMKALEDGKNDEAEEFKHKYEEEQRERRTTKTGDVPMWFAKNDEGHWAYKGGYWDRDYSNCLELFESLENSSTNSSNSSISSVD

>NP_001256642.1_Oxysterolbinding_protein_[Caenorhabditis_elegans]
MTKLLANPHAHLKLTFKKTGETYSWSAPKCAIYNVIMGKMYMNFTSHMKIESSGTYDAVFSFDNKGYYNHKGGDVHVEGHIFEGKNKIKALYGNWTLFLASCDNEDFKHHRKEYLRMFNETVSEKDQGPVVPGSKILWVSNQIPKLFDDQFHFTNFTLSLNEMYPGMSDTVAPTDSRRRKDMKALEDGKNDEAEEFKHKYEEEQRERRTTKTGDVPMWFAKNDEGHWAYKGGYWDRDYSNCLELFESLENSSTNSSNSSISSVD

>XP_003063927.1_predicted_protein_[Micromonas_pusilla_CCMP1545]
MRRRSTDGGWSSPSAPPPTTTRDDTPPNQRRAAAATPPSSPPRASLDGGERRASGGGVASNDGTSNNNNGHGAASASEKGRELARDAERVSKVVIAQVKQRGRDLGSKIKAAWKTTEREASALFVSPPSSPSPKSQQQQRSHRPRDGDDGEDGIGGARRDRDDASIRRRGGAAEKESGVDERERERDASRGGRAGSGSSRPAGGVQRAVAENLRRLARFPHRDESDPPEGYVNLWVNNFQRWQTRWLNASSTPGVLLVHRKSTKLGRATKIDLVGASVVFPSRSNQREFVVVAGDMLYKMRALRPGGREKWAAVIRDSASALERAAAIVKDRENERAAAAAARASEGGGGGGATATATAGAKKLGATRVDPPGGRPSRSSSSAPLDVHVAHSAPPVVRAAPPPSTPPPAADAATAEALRATLEKAWFEPTLAARAAAAECARDVKTGITRLAESLGVKVSGGEDDGSETAVTTALRGVEDAFTYALDAAIGKCVELETTNASLRRKLRCVLLLTKVFTHPSVSTFDRVPFQLTGGLFSYTGTALVSRANEQLAIVAAECAPKNGVATTRGVGAPGDGGGRGDGAAAGVSQKSEDVVVVTPGRASAFARALALRDDERARGPEGPGGVDSSESDASSDYGSVASFISAAASLSFGGGGGGAGDERETPEYIAAVEVMNKHDYVVSEGTAADGERGDELVEGVASPTPGGGADAAASLIFVGGGGDDDDDDGGGDDDDDAAADDDAADDDDVDDDDAAMAAFIPRTRLPAPAPLNQSFSLWSVLRQAMGKDLNRISMPASINQPLSILQRAVEDFEYLQLLYDAIDYPAGVNRMAALCGFALSSYASWFARPRKPFAPTLGETYDWTSPDGRTRVLVEQLVYDPPVAAWHVEGMSPRGEPFVVSGDLAGVSKFWGQYLEVNFQGAAHLTLPRTNETYSWSKASMHVHGLVSGQIWIDMVGDVAVFAHATGEKAKLRLAKASGKGGSGKARRGRVEGEIFDADGRVAATVDGCVLSEVRVHADEAYERRAVAEEAAVAEAEAVAGGGAPQRRRTRLHPLDVKWRGTGEGGGDALPLFAFAGFADDAARQYGFTPFAIALNELTPEQYRNLPPTDSRLRPDMRALEDGDVELASEMKRRVEGINRSSAAARKAKDEKYRPAWFARSESSGGGVRVNFAEHGAALWTYAGGYWEQREGGRWDRDATRGRDVFGLQRHLTTPTTRKSHAPRRSADGAPRIEASAEKKRDDDAEDEGEEKNAA

>XP_018636323.1_Oxysterolbinding_protein_[Toxoplasma_gondii_ME49]
MMSPESGAGARVRPLASPSPEGSESSSRRASASVPGPPSPGSPTSAAPRSARSRVSPQADDKEAAPDSRKDKDTGKQAEQDLQDESHKTLTSHAAGSKRDPPRRQQSALWRPQNPSLSPYSSHFGGASSLVPSPPASSSRSASPGRLASPSASGAPSASGAPSASGAPSASGARPDSPAASAESASSSLSPSAAAAVPPSPDASSTPLTSAFLADARLRQSPAAGPRTRPKQPGAPRPETLASRRALAGAGKEGIKSHRQAHPGGQLGRSGTAAYYAGAPHSSSKFLNSVIQQGWLQKWTNLVSSWRPRYFYVMPGLFKYSVQKGAPPKEVFMLNQCVIRLCPYDPVRFEVEVVDQQTLYLRTESLEEKQLWYAAFKQAQRALLNCTRHPALPLASLSSFSEKGGQRSSLGPQTGAQGAPDRTPSGPPGERHRAGAGESRPSDAPARHETSPSASQSTGPPTSSSLSSVASASRPSAAPFLPHSGSQELSPSGSSSFLSSSTSSVAGALAGAVASGMNYAAAYATSKLRGSLLSSAPSPSSPVPGGPGSSASEGTAALASTTAIGAAAGTGGAGNASGQLSPSLHSLGSAGSASFEWLGKEGSPLVLLLENVIASRQHVQSTSAEIRALQAGALKELGAILSSASGPAPGGHELKRQLVALLQKIDSLQMIVERHFSTTEALLAEENSQRRQLEKSLRSMAKQNYKLEKTQQRMLALGALPDGVQGAGPGAAPGAGVSPLAQGGAPPRGGPGGPLETDHQLSSSSGEEDDDDVEFFECEDQEAYGSPQDLPPPPAVPERPEGPGSAAAAASTVSPSPTDEQTLKQGEQPSNALLPAKSPAFYTLSLLFPSDIPPVLNFLEAIAGRLGGPMPQRRTALSKPRTEFKVGLWSILKDCIGKDLSRISMPVYFNEPTSFLQRLLEDFQYADLVHAAPVFADTVDRLLLVTVFAITPYASATGRTYKPFNPLLGETFEFTHRGYNFIAEQVGHHPPRTAYHVSNDRLLCWGDVVVRNRFTGKSLEVTTPGTVHVVFPGVDDHYTYRRVKLLVHNVIWGKLWAEVDGTTLVQNQKKGDYSIVQFLRKGWLDKSMHMIRAIVFSASGRPVYRLSGSWSHALYVEEYEQGRLLPNAPPQVPGSSMRDYWRSEGPPPSDGPDNKLQHLIQGFWDTVPVKEGSRRLVWRPAVRPAHSDAYYGFGYLTMELNEVTAEYNPEKGAVVAPTDSRFRPDQKLYEEGRVEEAIEEKTRLEEKQRSAARLRPRGEDDYDPLWFAKGEDPITHEPAWIYKGGYWEAKAEGGFPDSPDIF

>PIA15993.1_hypothetical_protein_COEREDRAFT_102622_[Coemansia_reversa_NRRL_1564]
MSTEAEAEGAVTYLDALEIFTRGDVEQVKKIIPQWMAAYNSSDEGGEGDALISSCTPLHLAVQCPRKEVVAAILEFDQPPVPVNATDGHGATALQLAAKAARRDVVKMLLRHGADDLAQDKQGHDALAYAAEPGVAAVLQDHRTEQAHAATAQLFAAARGSDSAKVEQTLEAVASRADVAGRNSDGGTLLHAAVQGGHETLARWAIAEGVDVFARDAHDKSAEAYAADNTRMRELLNQAPMGNARTVQPERAPRLSGSLHKWTNYAGGWKARWFELEDGVLSYYKNQADADSACRGAINLRVAKIGMVGRDRTQFEILGKGSVKYRVKAPDAAIAKQWVHLLNVSKQWALMRLKDTEDPSSPSAPSTEDAVAEDHGAPQRPRTSSLLRSKAADTPTSVRTSTPQSQHMRTQHQRRTSASSARSGNGEARSPRSSQLDGSPSVHSAADSTVESSSESDDEMYSTRNAFFSTLAELRAQLFIQDRLLEGLRKTEPLSQSSEELARYRNIATQTTAQSRDLVATLDRVYRESSAAWQARMRREQERIDMLADSLRSAVVSSQTLLESVRQKQDTVDQELKHQQNQEEARVPDALAAASSCMSNYGLSAAAPPEDDEEEDFADASDEFFDAVTSVVSLGPSAVQSTTPSPAAEREEALQKDMTLQKGEELPQKGLTTGGEEISQTVSPQDDISLHKKQSRQPTDLTALSGYPAAQTVRTTLPPITHGGPSLNLWSIIKGAIGKDLSKVSVPVFFNEPTSFLQRFTEDMEYSELLELAARLPRSADRTLFVAGFAMSNYASTFGRIAKPFNPLLGETFEYVRRDRKYRALSEQVEHHPPISACWVEGANFVYHADTNIKSKFNSGSLTVVPTGVCHVELRLPLAFLDCPEERNAGDARQSPNINHEEGYFTEHYTWNKLTTNVNGIMLANFWIEHVGDLNVVNHRTGDATKITFMQSGWTGKNKFKVTGESLDRRGQRVYEIAGDWTSRLVARPVGSEASADQAAEPVVYSNDTDHANSASTGDAVGFAAAHIVEVPRKPFVLWKINERPTQDNNYHLTTFAMSLNDKPSGLEPFLCPSDSRFRPDQRAMEVGEYELADREKSRLENKQRATRRRREQGELESWNPRWFEKALDEDSGEEFWRFNGQYWSERERVAEIKKQDENTKNQPSSIELWSGVEDIF

>XP_005715459.1_unnamed_protein_product_[Chondrus_crispus]
MQCSRHHVASRLHNGLDSFESNSSATFILDHHLPSHSSLIPHVIHYSSYLILPLQSPFDLFPLPLPFSLPPYTSLFVHITSPPPPLPFYPPTMSNAMAKLRRIVHRRRSSTGTSDNEKEVLTLTVARDELCILKKNADAGVAPCKSGTLLKYTNVVKRYKPRFFELENGTRKMFAFLKRQTSKEDKESDVKGKINLQLAVISADDSDPTRFVIDVGADLIHLKASTEEERDEWVAVMNASNHYFRNLIKKAVNRAKERAELLDSVTQKQTTIPSTIAHHPSPDNAPPPTGRVSSGSTESDDTVFEDDGVKEAQQSRKALLSELKRVHAVWRQKWVDDPTEAALRSEHDFLVTLADTFRDPRQHPPSSIENARESVKGLMDLIAWCLYAIQTNDEIFERRLKADLTRLMSDGLPVFPASPRKQQQTLRTNFDEPEESDMDSDTEFFDALSRAASMRSGRSRTLPPLDAVLGETDLEEPRVKRLGINEVQRVHTRVISKGFRHVRTSLPKLPGPREKLNVFNILKDSVGKDLSKVVVPITLNEPISFLQRLAEDIEYSELLDKAAEQSDAERRMMYVATMVISHYSSTQGRVQKPFNPLLGETACVIMPNKGKGLRFMAEQVSHHPPVSACYAEGSGASWKYHNAIEIKNKFWGKSLEVFPVGLNHVEIPEYGDHYVYKQVTTCVHNIVVGRLWLDNYGELEITNRTNGGKCIISFSKTGWMSDSRSFGAIKATVYDANGKAKIRLGGNWTKAVWEELPKGRRNVLWTVEERPDETASQMYNMTKWAISLNAEVRDEERKFVAPTDSRYRPDQRALEAGEWRAGTELKAQLEEAQRSRRRMQEGWMA

>XP_004991484.1_oxysterolbinding_protein_1_[Salpingoeca_rosetta]
MSDQKKRDVGYDVEVEEEEVVVVREQVVVEEEEEVLLATSVDENGNGGMHGRGRRRKASEEQEGEEEEEEEEEEPLEDAVVEEGPVEAEADEDVMDTLRWAMETDTPHHRTSLPVPRVHNAKDQSMWSVLRKNAGKRMSHISMPVTFNEPLSALQRLCEEAEHSHLLDQASIEDSPHQRLLLVGAFAVSMYGQTAYRSGRKPFNPILGETFDAVLPDRGFRFIAEQVSHHPPISVGVAESKHWTLYQEAGAKTSMRPSSLKIVPHGFVRVKLHAHDETYEWSKVTTTVEDVLSGKKWVDHHGKLVVTCLNSGDVCLVEFQQYSVMSKKKKFNVRGQVLTAAAPKRPVASFSGKWTEQIVCDQTGEVLWTNEPPSQAALDHGFGFSAFACRLNELPPQDSQQYARLLPSDSRFRPDQRMLENAQYDEAAEEKKRVEQVQRDARAARAAANTGYEPRFFRCCRLPVPRPHTVAFALKDKRHQETVREEWVYKGGYWRMKAAGSYPSLPPLW

>XP_001747911.1_uncharacterized_protein_MONBRDRAFT_33369_[Monosiga_brevicollis_MX1]
MARHPSLWLPAPRPPPVLSCAVSGAVSWYALLMKAQVSLLVAVLDDEQDDELDESIGIEAKAGALDLAEDEPVGESLRWAADNDYERRSHLSVKHDHALQSNSLWGVLKKNIGKKLSHIAMPVTFNEPLSALQRLCEELEHSHLLDNAAAAADPRERLMWVGAFAVASYGSSHFRSGRKPFNPILGETFDEVRPERGFRFFAEQVSHHPPISVCVAESSLWTFYQEAGVKSSLRPSSLKVTPQGFIRVSFPAYDETYEWQKVVTHVEDIVSGNKWVDHHGRMCVVNCRTGDTCKVELFQYSRFKKSQKYAVKGTVIDVANPKKPFATFSGKWNEKLVRDDTQEELWTNPVPEQESIDHEFGFTKFAMELNELPPEGNGQRDLLLATDSRNRPDQRLWEEAKEEAAAEEKLRVEELQRVRRQELEAEGKQHEPRFFEYRRVPAPKPAQLPSGVPALSREAERAEWLYKGGFWRQKKEQSIKSLPPLW

>XP_004364118.2_oxysterolbinding_protein_[Capsaspora_owczarzaki_ATCC_30864]
MSDNAGSVVPVHIHSSTSNPTSAGNGSVGTSASTATTAATMAGSASASPTGSRAAADLASSPTAASASPSTSTAAAAAAAGSAGLGVSHSAIPQAMQHANAGASAAGSSPATTVTAVTVPGTAPGSSSAVLATGNQANASSSLGHSNVNVGASGSAAGNASATSSNLHSAVSAATTTTPGGPAIQSKTVSFKTQPPQVPTPPSEPRPDPHAGVMWKKRRWPQIGWHKRFFVLDEGVLTYSRSLSDIQRGKTNGAVDVVNAAISVLASKHCFDIDAENSIIHIQAFTGHDFARWLAALKLHKTYYASHANRDRRALHQTPNVTIGGHSSGAAAGPTFALDGVTTSHSSTDGGDLRLNLAEDADITRIRDKIGTLTSILEWLTAQVTEPDAHATHHHGEDSDSGSNDPDAHHLPHAHGVAATTTTTPATADAAAAAAAAAATAHHSATPTGGAGPAPVLRSRSSDHIVVPVSEYAHSAPSSPALNMHAHPSSSSSLYPFRLGRAKSITSFRRNKDKDDMRDGKEPKEPKEPKKSRKERKLESKLKQQQRLMNPSVSSPSISSPMSGISTPIANPVVSAPPTIGLPPGEQLSAFLLNAAALLDSLTTATDDVANEQLKSHIELQRLQLEKAQAVSEMNAMRATLTEFATENANLQARLRLIHEQATLGISASPSSDPAVALEERLEKHRRAQGLVVGVPSSGSSSLLAASMGSRSRSTSSHNMDLDPSSATAGGPRHAGLLGAPLVRRGSIASHTSDRFFDAPEVLIVSSDEDDEDDVVHDSDEGSFGSDEEDDDDLDADANPAGGSSGARLVKTDSLNSISRAGRRFERFQDLEVVDADLSLVSSVSSPAKRFTRGTLSKTHSEDRPSIAPKGGPSTLHASIMGSSASSLPSDEGTVVSQAKITFPYAVTTPYRVRLPVPQPQGDVSLWSVLKKNIGKDLSRVSLPVTLNEPLSALQRLCEQMEYAELLDRAAALDDPVDRMLHVAAFAVSGYAPSLSRSGKKPFNPVLGETFELVRADKGYVAAFAVSGYAPSLSRSGKKPFNPVLGETFELVRADKGYRFMAEQVSHHPPVSACYAESDNYQFWQAASIKNKFWGKSMEIFPHGVLHVSIPARNDHYTWKKVTTCVHNIVSGQKWSDHYGEMVISNAAHDLECRLNFVKSGYFGSPTREVIGKVVQVSSGRVLAELQGCWHQSLYAHKGGANTANGKQPQQGTCIWSVHPLPPNNDQYYGFTTFALTLNESREGEHYPETDTRLRPDQRMLEQGDVDLAEKEKQRIENLHRDMRKQREKTGDHWSPRFFMNDHALDHDHEHKGDTDEDFEWKYNGKYWDTRTTASPKLW

>NP_001005927.1_oxysterolbinding_proteinrelated_protein_7_[Danio_rerio]
MDSVDHNQSHMSGVEKVSSGWQKPSHSRSSSTASSRHSRLNVKDWEVMDDCPADLTITAENIQDANTPGICEGYLMKRRKWPLKGWHKRYFVLDKGILRYTKNQHDFSRGKMHGSLDVSLAVMSVNKKARRIDLDAGDNLYHLKAKSQDLYFIWVTKLSAHRMYKKNEAAHVHNGYLQVLSHTSNLSHKTSPMQDMGTSGSSMGENLQYVSPAVNGKVSAWLQTQEPDFCGQELTRCQMELNELQRLVQKLNSLESGQTVYNGDLQRMISMQNLSLDKPKKKSAKIFGHSRTLSRVEGLGMLSSSQLNSSSLLGTSVPSIPDYVSTPANSPASTSPESKKLHQDICSMSLKVHASLRTAHEALAQERQRLRDTWSGRDLHQNTSAQLNNLCSLAELDVNSRHTKIHKLSISSNSSDDSFRTVEQRKSVSSRCSSFRAPSIADSVAEYFDACDELKCASSSEMSDESGLSDGSSNSEPYEAHAMASRKYRASLSKAAAKPNTIKSTGRRTTLPAVCPDNSHVGLMTILYNNIGKDLSRVSMPAALNEPVCLLQRLCEELEYSDLLDTANHTDDPFQRMVYIAAFAISGYATAQFRNRYKPFNPVLGETFECIREDRGFRYISEQVSHHPPISACHADSDNFSFWQDQRWKNKFWGKSLEIMPTGMVNVTLKKYGDHYEWNKVVTCIHNVLSQQRYLEHYGEVIIRNLNSSVCTCKITFVKSRYWGADAARNQVQGQVLDQTGNVIHRFGGFWHEGIFCETLPVPQCIWKPNPQPKNYLLYYGFSSFAMEMNELVPELKPLLPPTDTRLRPDQRLLEEGKVEETDKKKDEVEEKQRERRKIMAKRGEEHIPRFFRKSLDAAGREVWLTNGTYWKIRENPGFANVNNLELW

>XP_015154969.2_oxysterolbinding_proteinrelated_protein_7_[Gallus_gallus]
MGSHEKDPSSPKKALSRSNSTVSSKHSSIQQGSESWEVVEEPRARGSPGREPERQEGYLLKKRKWPLKGWHKRYFVLENGILKYATTRQDVLKGKLHGAIDVRQSVMSVNKKAQRVDLDTEENIYHLKIKSAELFASWVSSLCSHHQGESPDPLAPSRRTPTTAQGPWTRIVPSGSAPALSALASSRDKVDAWLKDSEGLERCSAELSVCQAQLRELTEMLQSLESLHRIPSAPLISSTQPSAATERPKKGRRTTRMWCTQSFAKDDTIGRVGRLHGSVPNLSRYLEPSQGQLPFSLPPEYSQLQRSFWVLAQKVHDSLSSVVTALTAERARLEDMQRALDRRRSAPRPGSAGPTGTPLPGLEPRDGLQRFHSLSVSSDATMDSFASLLPDEPDVLPAKGREQQRSQRSIASLADSHTEFFDACEVFLSASSSENEASDDESCISEATNSIDEDLAEPGGPGRPQTGMDSLGGLVELPPLELPGPGLQRRSRLPAPPAPPGDVSLWGLLRSSVGKDLSRVALPVQLNEPLNTLQRLCEELEYSALLDRAARARDPRQRMVYVAAFAVSAYASTFYRAGSKPFNPVLGETYECVRPDRGFRFISEQVSHHPPISACHAESDNFVFWQDMRWKNKFWGKSLEIVPVGTVNVRLPRSGDHFEWNKVTTCIHNVLSGPRWIEHYGEVLIRNTRDASYHCKITFCKARYWGAGANEVQGAVLSRSGAVVERLAGKWHEGLFRGPAPGQCVWRANSMPPDHERNYGFTQFALELNELTPELRRVLPSTDTRLRPDQRYLEEGNVAAAEAQKRQIEQLQRDRRRVMEENNITHQARFFRRLMDASGKESWVTNNTYWKLRLDPGFAHLDSAVLW

>XP_016285039.1_PREDICTED:_oxysterolbinding_proteinrelated_protein_7_[Monodelphis_domestica]
MDSQERDPGSPRRAAAPSLSDSTQPSKYIIQQGLELWELVEEPQGRLGTEGTQPGRQEGPLLKKRKWPLKGWHKRYFVWDLPNAKGKLHGSIDVRSSVMSINKKAQRIDLDTEDNIYHLKIKSQELFQSWVARLCAHRMAQRPDMARCPKLPASSTNRKTSSARLASTDNMPALGSQDKVSTWLKDSEGLDRCSHELSECQGKLQELHKLLQSLESLHRIPSAPVISTNQQEALYMKGRELTPQLSQRSVLSLADSHTEFFDACEVFLSASSSENEGSEEESCTSEVTTSLSEEVLDIGSTEHCQKGSCISEGAGVPPRRRCLPAASGPGTDVSLWNILRNNIGKDLSKVSMPVQLNEPLNTLQRLCEELEYSNLLDQASRTPDPCERMLYIAAFAVSAYSSTYHRAGCKPFNPVLGETYECERPDRGFRFISEQVSHHPPISACHAESDNFIFWQDMKWKNKFWGKSLEIVPVGTVNVRLPRFGDHFEWNKVTSCIHNILSGQRWIEHYGEVLIRNTQDSSCHCKITFCKAKYWSSSVHEVQGAVFSRSGRVIHRLFGKWHEGLYRGPPPGGQCIWKPNLMPQDHERNFGFTQFALELNELTAELKRSLPSTDTRLRPDQRYLEEGNIQAAESQKRRIEQLQRDRRKVMEENNITHQARFFRRQTDGNGKEWWVTNNTYWRLRAEPGYGNLDGAVLW

>XP_011247566.1_oxysterolbinding_proteinrelated_protein_7_isoform_X1_[Mus_musculus]
MPSGDCAPHFQVIWYHSVLSPPESRGAELSGSPELGGRRQRRRGRWGDPAGGEAPTSPSFLVPAVAAATAQFCEELAGDSETVSGTAAYGSRGSGVHGSWGFPQDKVTFSPTHPALPSSSGSNFFLMDFQERDTPSLAESTQSSKPSSTQQASELWEVMEEPRGRLGADDIMPERQEGHLLKKRKWPLKGWHKRYFVLEDGILHYATTRQDITKGKVHGSIDVRLSVMSINKKAQRIDLDTEDNIYHLKIKSQDLFHSWVAQLRAHRLAQRLDMPSATHRKAPGTQMLTAGSASALPGVGPREKVSSWLRDSDGLDRCSHALSECQGKLQELHRLLQSLESLHRIPSAPVIPTHQTSVTTERPKKGKRTSRMWCTQGFAKDDTIGRVGRLHGSVPNLSRYLESRDTSGPRGLPPPDYAHLQRSFWALAQKVHNSLSSVLVALTTERDRLRDLHQGSELSRMVVSEAPDGQRRLHSLSISSDTTADSFSSLNPEEQEALYMKGRELTPQLSQSSVLSLADSHTEFFDACEVLLSASSSENEGSEEEESCASEITTSLSEEVLDIRGADRYQKAVELCWLGGSQPCCPRTSPGYHKQSDAPVTSHSGQRWDALGGPCVPGIAVGPPRRRCLPAASGPGTDVSLWNILRNNIGKDLSKVSMPVQLNEPLNTLQRLCEELEYSSLLDQASRMADPCERMVYIAAFAVSAYSSTYHRAGCKPFNPVLGETYECERPDRGFRFISEQVSHHPPISACHAESENFIFWQDMKWKNKFWGKSLEIVPVGTVNVSLPRFGDHFEWNKVTSCIHNILSGQRWIEHYGEVLIRNTQDSSCHCKITFCKAKYWSSNIHEVQGAVLSRSGRVLHRLFGKWHEGLYRGPPPGGQCIWKPNSMPPDHERNFGFTQFALELNELTSELKRTLPSTDTRLRPDQRYLEEGNIQAAEAQKRRIEQLQRDRRRVMEENNIVHQARFFRRQTDSSGKEWWVTNHTYWRLRAEPGYGNLDGAVLW

>NP_665741.1_ORP7_Homo_sapiensMDFQERDPPFLPESAQSSKPSSAQQASELWEVVEEPRVRLGTEGVMPERQEGHLLKKRKWPLKGWHKRYFVLEDGILHYATTRQDITKGKLHGSIDVRLSVMSINKKAQRIDLDTEDNIYHLKIKSQDLFQSWVAQLRAHRLAHRLDMPRGSLPSTAHRKVPGAQLPTAATASALPGLGPREKVSSWLRDSDGLDRCSHELSECQGKLQELHRLLQSLESLHRIPSAPVIPTHQASVTTERPKKGKRTSRMWCTQSFAKDDTIGRVGRLHGSVPNLSRYLESRDSSGTRGLPPTDYAHLQRSFWALAQKVHSSLSSVLAALTMERDQLRDMHQGSELSRMGVSEASTGQRRLHSLSTSSDTTADSFSSLNPEEQEALYMKGRELTPQLSQTSILSLADSHTEFFDACEVLLSASSSENEGSEEEESCTSEITTSLSEEMLDLRGAERCQKGGCVPGRPMGPPRRRCLPAASGPGADVSLWNILRNNIGKDLSKVSMPVQLNEPLNTLQRLCEELEYSSLLDQASRIADPCERMVYIAAFAVSAYSSTYHRAGCKPFNPVLGETYECERPDRGFRFISEQVSHHPPISACHAESENFAFWQDMKWKNKFWGKSLEIVPVGTVNVSLPRFGDHFEWNKVTSCIHNVLSGQRWIEHYGEVLIRNTQDSSCHCKITFCKAKYWSSNVHEVQGAVLSRSGRVLHRLFGKWHEGLYRGPTPGGQCIWKPNSMPPDHERNFGFTQFALELNELTAELKRSLPSTDTRLRPDQRYLEEGNIQAAEAQKRRIEQLQRDRRKVMEENNIVHQARFFRRQTDSSGKEWWVTNNTYWRLRAEPGYGNMDGAVLW

>NP_001120877.1_oxysterolbinding_proteinrelated_protein_6_[Danio_rerio]
MSRHQSRTTSLEEKVATPIHRSTAPLQKSSTPTHKSASSSSSSQRDSRQEPDSWEIIEGLRIGQTHVQRPEKHEGFMLKKRKWPLKGWHKRFFVLDNGILKYSKSPVDIQKGKLHGSIDVGLSVMSIKKRARRIDLDTEEHIYHLKVKSPDVFDLWVCKLRHHRLFRQNEIVRSPRDATLRTFPPSAGAESPQNTPSSTHPKKQGKPSSFPWQLPPSCSNGQSKVAAWLQESEEMDKCAEELAYCQSSLLELNQLLQSLEILQRTQSAPNFTDMQSNCVDLSKKEKRVSRRWRTKSVSKDAKLQQQVPLSASMSQVRLHSSNPNLCAELADFQAPVTRLTDGIDSAGDYIKLQEDFCIIAQKVHSLLKSAFNTVAIEKEKIKQVLLDHEQTGQSNQIVTLRRSLSQALSQNAELKTRLNRIHSESVLSEQVVSVNIISSPDEACEPLHVGLPLSQQVSNESRLSMSESVSEFFDAQEVLLSASSSENEASDDESYVSDVSDNISEDNASVTDNVSRQMPNGELASSMFRNGRRPCLPAPAPDTSNINLWNILKNNIGKDLSKVSMPVELNEPLNTLQHMCEELEYTELLDKAAQTDDPYERMAIVAAFAVSGYSSTYYRAGSKPFNPLLGETYECIREDKVSHHPPISACHCDSQNFTFWQDVRWKNKFWGKSMEILPIGTVNVMLPSYGDHYEWNKVTTCVHNILSGRRWIEHYGEVTIRNTRSTTCICKLSFIKGNYWSSNVNEVQGSVMDQEGRVIHRLFGKWHEGLYCGVPPSAKCIWRPGSMPTDYELYYGFTRFAVELNELFPEMKELLPPTDARFRPDQRFLEEGNVQMATAEKQRIEEQQRNRRKWMEENNIKHQPRFFKKVMDSNQRERWVSNSMYWELRKDPGFLKLENPELW

>XP_031748819.1_oxysterolbinding_proteinrelated_protein_6_isoform_X1_[Xenopus_tropicalis]
MSSEEKGISPAHKTSTPTHKSASSSSSSQRDSRQEADSWEIIEGLKIGQSSVQKPEKHEGFMLKKRKWPLKGWHKRFFVLDNGILKYSKSPIDTQKGKLHGSIDVGLSVMSIKKKARRIDLDTEENIYHLKVKSPDTFDAWVSKLRHHRLYRQNEIVRSPRDASLHMFPSTSTTESSPAANVTVPEGKVPQNNFLWQSPIPCSNSLPATCTTGQSKVAAWLLDSEEMDKCAEDLAQCQSNLIELSKLLHNLELLQRTQSAPNFIDMQANCVDISKKDKRASRRWRTKSVSKDAKIQLQVPHSASMSPVRLHASNPNLYADVEFQNPPSHVVDAMEFASDYTKLQEEFCLIAQKVHSLLKSAYNTIAIEKEKMKQMVSDQDYSGQSTQIARLRQSLSQALNHNSELRSRLNRIHTESVISDQVVSVNIIASSDESCEPMHVSLPLSQQVSNEGRLSMSESVSEFFDAQEVLLSASSSENEASDDESYISDVSDNISEDNTSVADNVSRQILNGELLGGAFRTGRRTCLPAPSPDTSNINLWNILRNNIGKDLSKVSMPVELNEPLNTLQHLCEELEYSELLDKAAETDDPHERMALIAAFAVSGYASTYYRAGSKPFNPVLGETYECIREDKGFRFFSEQVSHHPPISACHCESKNFVFWQDIRWKNKFWGKSMEILPFGTVNVTLPKYGDCYIWNKVTTCIHNILSGRRWIEHYGEITIRNTKNCVSMCKMTFIKGSYWNSSANEVHGVVMDQEGKVVHRLFGKWHEGLYCGDAPAAKCIWRPGSMPTNYELYYGFTRFAIELNELDPVLKDFLPLTDARFRPDQRLLEEGNVEAAAMEKQRIEELQRSRRKCMEEDHVEYTTKYFRKVIDFHQKEMWISNDTYWELRKDPGFSKVDLPVLW

>XP_421982.3_oxysterolbinding_proteinrelated_protein_6_isoform_X1_[Gallus_gallus]
MSSEEKSISPAHKTSTPSHRSASSSSSSQRDRRQSVNLLERKASSGSTDPSLSKQFLEADPISLSKQEPDSWEIIEGLKIGQTNVQKPDKHEGFMLKKRKWPLKGWHKRFFVLDNGLLKYSKSPIDIQKGKVHGSIDVGLSVMSIKKKARRIDLDTEEHIYHLKVKSQDTFDAWVSKLRHHRLYRQNEIVRSPRDASFHIFPSASTTESSPAANVPDGKVQQNSFPWQSPIPCSNSLPATCTTGQSKVAAWLQDSEEMDRCAEDLAHCQSNLVELSKLLQNLEILQRTQSAPNFTDMQANCVDISKKDKRVTRRWRTKSVSKDAKIQLQSNSSGDNISEVPSYISLWHTQEGPAPKGQFSTTRRRQRLAAAVATTVPFSATMSPVRLHSSNPNLCADIEFQTPPSHVTDPLECSTEYMKLQEEFCLMAQKVHSLLKSAFNSIAIEKEKLKQIVSEQDLTGHNAQIAHLRQSLSQALNQNAELRSRLNRIHSESVICDQVVSVNIIPSPDETGEQIHVSLPLSQQVSNESRLSMSESVSEFFDAQEVLLSASSSENEASDDESYISDVSDNISEDNTSVADISRQIVNGELTGGAFRNGRRTCLPAPSPDTSNINLWNILRNNIGKDLSKVSMPVELNEPLNTLQHLCEELEYSELLDKAAETDDPYERMVLIAAFAASGYASTYFRAGSKPFNPVLGETYECIREDKGFRFFSEQVSHHPPISACHCESKNFVFWQDIRWKNKFWGKSMEILPVGTLNVTLPKYGDYYVWNKVTTCIHNILSGRRWIEHYGEITIRNTKSSVCICKLTFVKVNYWNSNVNEVQGVVIDQEGKVVHRLFGKWHEGLYCGVAPSAKCVWRPGSMPTNYERYYGFTRFAIELNELDPVLKDLLPTTDARFRPDQRLLEEGNIEAAASEKQRIEELQRSRRRYMEENSIEYVPKFFKKVIDANQREAWVTNETYWELRKDPGFSKVEIPVLW

>XP_016289210.1_PREDICTED:_oxysterolbinding_proteinrelated_protein_6_isoform_X1_[Monodelphis_domestica]
MSSEEKGISPAHKTSTPTHRSASSSSSSQRESRQSVHILERNASTGNEPSASRQLLETEPVSLSKEADSWEIIEGLKIGQTNVQKPDKHEGFMLKKRKWPLKGWHKRFFVLDNGMLKYSKAPLDIQKGKVHGSIDVGLSVMSIKKKARRIDLDTEEHIYHLKVKSQDWFDGWVSKLRHHRLYRQNEIVRSPRDASFHIFPSTSTTESSPAANVAVMDGKVQQNSFPWQPPIPCSNSLPATCTTGQSKVAAWLQDSEEMDRCAEDLAHCQSNLVELSKLLQNLEILQRTQSAPNFTDMQANCVDISKKDKRVTRRWRTKSVSKDAKIQLQEGPPPKGQFSTTRRRQRLAAAVATTVPFSATMSPVRLHSSNPNLCADIEFQTPPSHLADPLETSTDYTKLQEEFCLIAQKVHSLLKSAFNSIAIEKEKLKQMVSEQDHNQGHNPQMARLRQSLSQALNQNAELRSRLNRIHSESIICDQVVSVNIIPSPDEPGEQIHVSLPLSQQAANESRLSMSESVSEFFDAQEVLLSASSSENEASDDESYISDVSDNISEDNTSVADNISRQILNGELTGGAFRNGRRTCLPAPCPDTSNINLWNILRNNIGKDLSKVSMPVELNEPLNTLQHLCEEIEYSELLDKASETDDPYERMVLIAAFAVSGYCSTYFRAGSKPFNPVLGETYECIREDKGFRFFSEQVSHHPPISACHCESKNFVFWQDIRWKNKFWGKSMEILPVGTLNVMLPKYGDYYVWNKVTTCIHNILSGRRWIEHYGEITIRNTKSSICICKLTFVKVNYWNSNVNEVQGVVMDQEGKVVHRLFGKWHEGLYCGVAPSAKCIWRPGSMPTNYELYYGFTRFAIELNELDPVLKDLLPPTDARFRPDQRFLEEGNLEAAAAEKLRVEELQRSRRRYMEENHLEHIPKFFKKVIDANQREAWVSNDTYWELRKDPGFSKVESPVLW

>XP_030108130.1_oxysterolbinding_proteinrelated_protein_6_isoform_X1_[Mus_musculus]
MSSDEKGISPAHKTSTPTHRSASSSTSSQRESRQSIHVLERTASSSTEPSVSRQLLEPEPIPLSKEADSWEIIEGLKIGQTNVQKPDRHEGFMLKKRKWPLKGWHKRFFVLDNGMLKYSKAPLDIQKGKVHGSIDVGLSVMSIKKKARRIDLDTEEHIYHLKVKSQDWFDAWVSKLRHHRLYRQNEIVRSPRDASFHIFPATSTAESSPAANVSVVDGKMQPNSFPWQSPLPCSNSLPATCTTGQSKVAAWLQDSEEMDRCAEDLAHCQSNLVELSKLLQNLEILQRTQSAPNFTDMQANCVDISKKDKRVTRRWRTKSVSKDTKIQLQEGPPAKGQFNTTRRRQRLAAAVATTVPFSATMSPVRLHSSNPNLCADIEFQTPPSHLTDPLESSTDYTKLQEEFCLIAQKVHSLLKSAFNSIAIEKEKLKQVVSEQDHNKGHSTQMARLRQSLSQSEGAGKSWALNQNAELRSRLNRIHSESTICDHVVSVNIIPSPDEPGEQIHVSLPLSQQVANESRLSMSESVSEFFDAQEVLLSASSSENEASDDESYISDVSDNISEDNTSVADNISRQILNGELTGGAFRNGRRTCLPAPCPDTSNINLWNILRNNIGKDLSKVSMPVELNEPLNTLQHLCEEMEYSELLDKASETDDPYERMVLVAAFAVSGYCSTYFRAGSKPFNPVLGETYECIREDKGFRFFSEQVSHHPPISACHCESKNFVFWQDIRWKNKFWGKSMEILPVGTLNVTLPKYGDYYVWNKVTTCIHNILSGRRWIEHYGEVTLRNTKSSVCICKLTFVKVNYWNSNVNEVQGVVIDQEGKVVHRLFGKWHEGLYCGVAPSAKCIWRPGSLPTNYELYYGFTRFAVELNELDPVLKDLLPPTDARFRPDQRFLEEGNLEAAAAEKQRVEELQRSRRRYMEENNLEHIPKFFKKVIDANQREAWVSNDTYWELRKDPGFSKVDSPVLW

>NP_115912.1_ORP6_Homo_sapiens
MSSDEKGISPAHKTSTPTHRSASSSTSSQRDSRQSIHILERTASSSTEPSVSRQLLEPEPVPLSKEADSWEIIEGLKIGQTNVQKPDKHEGFMLKKRKWPLKGWHKRFFVLDNGMLKYSKAPLDIQKGKVHGSIDVGLSVMSIKKKARRIDLDTEEHIYHLKVKSQDWFDAWVSKLRHHRLYRQNEIVRSPRDASFHIFPSTSTAESSPAANVSVMDGKMQPNSFPWQSPLPCSNSLPATCTTGQSKVAAWLQDSEEMDRCAEDLAHCQSNLVELSKLLQNLEILQRTQSAPNFTDMQANCVDISKKDKRVTRRWRTKSVSKDTKIQLQVPFSATMSPVRLHSSNPNLCADIEFQTPPSHLTDPLESSTDYTKLQEEFCLIAQKVHSLLKSAFNSIAIEKEKLKQMVSEQDHSKGHSTQMARLRQSLSQALNQNAELRSRLNRIHSESIICDQVVSVNIIPSPDEAGEQIHVSLPLSQQVANESRLSMSESVSEFFDAQEVLLSASSSENEASDDESYISDVSDNISEDNTSVADNISRQILNGELTGGAFRNGRRACLPAPCPDTSNINLWNILRNNIGKDLSKVSMPVELNEPLNTLQHLCEEMEYSELLDKASETDDPYERMVLVAAFAVSGYCSTYFRAGSKPFNPVLGETYECIREDKGFRFFSEQVSHHPPISACHCESKNFVFWQDIRWKNKFWGKSMEILPVGTLNVMLPKYGDYYVWNKVTTCIHNILSGRRWIEHYGEVTIRNTKSSVCICKLTFVKVNYWNSNMNEVQGVVIDQEGKAVYRLFGKWHEGLYCGVAPSAKCIWRPGSMPTNYELYYGFTRFAIELNELDPVLKDLLPPTDARFRPDQRFLEEGNLEAAASEKQRVEELQRSRRRYMEENNLEHIPKFFKKVIDANQREAWVSNDTYWELRKDPGFSKVDSPVLW

>XP_005170085.1_oxysterol_binding_proteinlike_3a_isoform_X1_[Danio_rerio]
MSSDEQLSPLSPKTSPVTPFQQRKESNSSSDDNRQARQGSWEVVEDMQGLIGDIQKPEKQEGLLLKKRKWPMKGWHKRYFLLERGILTYAKTGSDLKKGRLRGRIDVGLSVMAMKKKSMCIDLDTEDSIYHLKAKTRSLFDLWVMQLRHHRIFRQNEIAMEPPERQLQSDPASSRQCPQRSFISMQPSALLKNNWRQNSQDMEKCYKDLSECESSLLELNLLLKNMEVLHRTFSAPAINLLQSEGSKKEKRGHKKWKSKNYSKENKNALQNPDAPSSRLHVSHPNLVYSEPVSPDSCLESPDSPTEASRMQEEFCRLAGTVHSTLRSAYSLLCSERDRVKNTLDFISEKDVFDGSRPLLQQMSSESRGSIPESMSEFFDAKEYLLSGSSSDNEVSDDDSYVSDVSDSTSVEFCRNENGNMREIFVSSGNGNESAVMRRARLPSARMNESVNLWSILRSNIGKDLSKVAMPVQLNEPMNTLQRLCEEVEYCHLLDTAANTHDPHMRMVYIAAFAISAYACSFTRAGGKPFNPILGETFECMRADKGFRFIAEQVSHHPPVSACHCESKSYTFWQDMRWKNKFWGKSMEIVPMGVTHLELPGFGDRYEWSKVTSCIHNILSGQRWIEHYGEMSIKHSNTTGDVSHCKITFLKSRSGGLNANEVEGLVTDLEGRIIHSLFGKWNEALYLGKPPSATCIWRANPMPENHEQYYGFTQFAIQLNELEEGLKPLLPPTDTRFRPDQRLLEEGDVAGAEEQKERIEVLQRERRRVLQENNMTHSPRFFKRAKDDTWVSNGTYWELRKDPGFSKLEFPVLW

>NP_001004646.1_oxysterol_binding_proteinlike_3a_[Danio_rerio]
MKGWHKRYFLLERGILTYAKTGSDLKKGRLRGRIDVGLSVMAMKKKSMCIDLDTEDSIYHLKAKTRSLFDLWVMQLRHHRIFRQNEIAMEPPERQLQSDPASSRQCPQRSFISMQPSALLKNNWRQNSQDMEKCYKDLSECESSLLELNLLLKNMEVLHRTFSAPAINLLRSEGSKKEKRGHKKWKSKNYSKENKNALQNPDAPSSRLHVSHPNLVYSEPVSPDSCLESPDSPTEASRMQEEFCRLAGTVHSTLRSAYSLLCSERDRVKNTLDFISEKDVFDGSRPLLQQMSSESRGSIPESMSEFFDAKEYLLSGSSSDNEVSDDDSYVSDVSDSTSVEFCRNENGNMREIFVSSGNGNESAVMRRARLPSARMNESVNLWSILRSNIGKDLSKVAMPVQLNEPMNTLQRLCEEVEYCHLLDTAANTHDPHMRMVYIAAFAISAYACSFTRAGGKPFNPILGETFECMRADKGFRFIAEQVSHHPPVSACHCESKSYTFWQDMRWKNKFWGKSMEIVPMGVTHLELPGFGDRYEWSKVTSCIHNILSGQRWIEHYGEMSIKHSNTTGDVSHCKITFLKSRSGGLNANEVEGLVTDLEGRIIHSLFGKWNEALYLGKPPSATCIRRANPMPENHEQYYGFTQFAIQLNELEEGLKPLLPPTDTRFRPDQRLLEEGDVAGAEEQKERIEVLQRERRRVLQENNMTHSPRFFKRAKDDTWVSNGTYWELRKDPGFSKLEFPVLW

>XP_696327.5_oxysterolbinding_proteinrelated_protein_3_isoform_X1_[Danio_rerio]
MSSEEKSSTMSQKISSPSHSNSSSSSKHDSRQDSWEIVEGLRGGHSNVQEPEKQAGFMLKKRKWPMKGWHKRYFYLDKGILKYAKCAADVEKGKLHGCIDVGLSVMAIKKKAKCIDLDTEENIYHLKIKSQELFDEWVSKLRHHRLYRQNEIAMFPHEKALFHPHYPLTSSPTIPDSQAIRKRASLAKQSSLHSPAPFTSQAKVTAWLQSSDDMDRCTKELSVCEAQLLELNHLLRSMEVLHRTYSAPAINALQASTYDSPKKEKRHPRKWRPKNYGKDNKTTLQVPSCISAGSVRLHASNPNLSSVDLTTEKTYHEPLDSPIDVSKLQEDFCRVANNLHTTMKSALCMLTTEKERVKQMLEHEPCPSPSAQLLGLKNALTAAVTQNAELRERLCKIHAESHISEPTVHINLSPGPLQKQDSSDCSRPLVHQASNESRASISESLSEFFDAQEVLLSASSSENEASEDDSYISDISDNVSMDNFSNEAENERLNTGCLVNGGFQEQRRSCLPSPSPNTSNISLWNILKNNIGKDLSKVAMPVELNEPLNTLQRLCEELEYSELLDKAAHTQDPFERMVYIATFAVSGYASSYYRAGGKPFNPVLGETYECDRPDKGFRFVAEQVSHHPPISSCHAESKNFIFWQDVRWRNKFWGKSMEIVPVGSSHVVLPGFGDHYEWNKVTSCIHNILSGQRWIEHYGEISIKNSNSEKCQCKVTFIKAKYWNSSMNEVEGSVTDHKGKVVHKLFGKWHEGMYCGSPPSATCIWRTNPMPPEFEQYYGFTKFAMELNELDPLTKPLLPPTDTRLRPDQRLLEEGNVQSAEVQKQRIEQLQRERRKVLEENHMTHQPRFFQKSKDETWVSNNTYWDLRKDPGFSNLDCPVLW

>XP_012819861.2_oxysterolbinding_proteinrelated_protein_3_isoform_X1_[Xenopus_tropicalis]
MMGEERNLGVSQRMLSPSRSTSSCSSKLGSRQTNHIHPQKTVELIKNLWVRRRQLKKHNLCLACDKSALNTKSLCGECLQKAGNDSSSRFHTPWMDSWEIVEGLRSSTNYVQEPEKQEGFLLKKRKWPLKGWHKRYFFLDKGILKYSKSQADMERGKLHGCIDVGLSVMSVKKSTKCIDLDTEEHIYHLKVKFPEVFEEWVLKLRDHRLYRQNEISVFPHDLNAPFFPMISTTESASSAFDTVPSPQDFNRKNSLKLGNNLPFSCLNNETRVPAWLQSSDEMEICAKELSQCHSYIVEMSNLLQNMEVLHRTYSAPSINAIQIGTIESPKKEKGIHRRKWRSKGLNKDSKGSLQVPSAFSGVMRLHASNPNLSTIDYAEEKQYSGGSENSEVTKMQDSLCHIANKAYFSLKSAYNTVFSEREKLKQFLEHDSSPSAPIAGLKNALSSDSPCEEGKTLVHQMSNESRLSITDSLTEFYDAQEVLLSSSSSENEVSDDDSYVSDISDNVSEDNLSNDIDSERLSLNGGSVTTVDGCYKHRTCLLAPCPNTSNISLWNILRNNIGKDLSRVSMPVQLNEPLSTLQRLCEELEYSSLLDKAAHTPDPFERMVYVATFAVSAYASSFYRAGSKPFNPVLGETYEFIKEDQGFRFISEQVSHHPPISACHADSENFVFFQDMRWKNKFWGKSMEIVQIGTTHLILPGFGDHYEWNKVTSCIHNILSGQRWIEHYGEIIIKNTKSDTCHCKVTFVKAKYWNPNVHEIEGTVMDRNGKVVHRIFGKWHESILYGSPSAPTCIWRANPMPKDSELYYGFTKYAFQLNEMDPKIKFSLPCTDTRFRPDQRYLEEGNIEAAEMQKERIEQLQRERRKVLEENNLEHQPRFFRKTSDDSWVTNGTYWQLRKDPGFAKIDCPVLW

>XP_025003202.1_oxysterolbinding_proteinrelated_protein_3_isoform_X1_[Gallus_gallus]
MSEEKNFGASQKMLSPSRSTSSCSSKQGSRQQDSWEIVEGLRGAMNCTQEPQKQEGCLLKKRKWPLKGWHKRYFFLDRGILKYSKCQADIERGKLHGCIDVGLSVMSVKKSTKCIDLDTEEQIYHLKVKSQELFDEWVAKLRHHRMYRQNEISMFPHDVNNLFFPVSTTVDSGPGLCDLTPSRKAGSLTKQNSLSAGGNLSFSFSSNESRIPSWLQSSEDMEKCSRDLSTCHAYLLEMNQLLQSMDVLHRTCSAPAINAMQVGPFESPKKEKRAHRRWRSRVVGKEAKGTLQVPSVFSAPMRLHASNPNLSTIDFVEEKNYSDGSETSSEFTKMQEDLVHIAHKVYFTLKSAFSSISTEREKLKQMLEHEASSSPSAQIVGLKNALTSAIAQNTDLKDRLRRIHAESMILDSASNAKSSPDLVKENSREENRGLVHQISNESRLSIADSLTEFFDAQEVLLSASSSENEVSDDDSYVSDISDNVSEDNLSNDIENERQTLDCISESGIGCHSKRRTCLPAPCPNTSNISLWNILRNNIGKDLSKVAMPVELNEPLNTLQRLCEELEYSELLDKAAHTPNPFERMVYIAAFAVSAYASSYYRAGSKPFNPVLGETYECIREDKGFQFFAEQVSHHPPISACHAESVNFAFWQDVRWKNKFWGKSMEIVPVGTTHVTLPAFRDHFAWNKVTSCIHNILSGQRWIEHYGEIIIKNLNDDTCYCKLTFIKAKYWNPNAHEIEGSVMDKTGNVVHRLFGKWHESLYCGTTSSSKCIWRANPMPKDYEQWYGFTQFALELNELDLQTRSLLPSTDTRFRPDQRFLEEGNIEAAEMQKQRIEQLQRERRKVLEENNLEHQPRFFRKSKDDSWVSNGTYMDLRREPGFSKLDNPVLW

>XP_007505404.1_PREDICTED:_oxysterolbinding_proteinrelated_protein_3_isoform_X1_[Monodelphis_domestica]
MSDEKGLGLSQKLVSPSRSTSSCSSKQGSRQVKDSWEVVEGLRGEMTCTQEPQIQKGFLLKKRKWPLKGWHKRFFFLEKGILKYAKNLADIEREKLHGSIDVGLSVMSVKKSSKCIDLDTEEHIYHLKVKSEEVFEEWVAKLRHHRVYRQNEIAMFPRDVNHFFPGSTVTDSASGVFDSVSSRKRSSISKQSSLQTGSSLSFSCGEARVPIWPHSSEDMEKCSKDLAHCHTYLIEMSQLLQSMEVLHRTYSAPAINALQGGAFESPKKEKRPHRRWRARAISKEAKGMLQVPKPYSGPVRLHASNPNLSTLDFGEDKNYSDGSETSSEFSKMQEDLCHIAHKVYFTLKSAFNTLSNEREKLRQISDHDYSSSPSAQIVGLKHALSSALAQNTDLKERLRRIHAESLFLDSAAGAKSSDGLAEEISGEEGRALVHQLSNESRLSITDSLSEFFDAQEVLLSPSSSENEVSDDDSYVSDVSDNASVDNLSNDLDSERQTLGPILESDPGGQTRGQTQRRTSLPAPCPNTSNISLWNILRNNIGKDLSKVAMPVELNEPLNALQRLCEELEYSELLDQASRTPDPLERMVYVAAFAVSAYASSYFRAGSKPFNPVLGETYECIHEEKGFQYFSEQVSHHPPISACHAESANFVFWQDVRWKNKFWGKSMEIVPVGTTHVTLPAFGDHFEWNKVTSCIHNILSGQRWIEHYGEIIIKNLNEDSCHCKVNFIKAKYWSTNSHEIEGTVFDKAGKAVRRLFGKWHESIYSGTRSSSTCIWRAHPMPKGHEQYYGFTQFALELNELDSLTRPFLPPTDTRFRPDQRLLEEGNLEEAETQKQRVEQLQRERRRVMEENNLEHQPRFFRKSSDDSWVSNGTYLDLRRDPGFSKLDNPTLW

>XP_011239770.1_oxysterolbinding_proteinrelated_protein_3_isoform_X1_[Mus_musculus]
MSDEKNLGVSQKLVSPSRSTSSCSSKQGSRQDSWEVVEGLRGEMTYTQEPPVQKGFLLKKRKWPLKGWHKRFFCLEKGILKYAKSQADIEREKLHGCIDVGLSVMSVKKSSKCIDLDTEEHIYHLKVKSEELFDEWVSKLRHHRMYRQNEIAMFPRDVNHFFSGSSVTDSAPGVFESVSSRKRSSLSKQNSFPPGSNLSFSCGGDTRVPFWLQSSEDMEKCSKDMAHCHAYLLEMSQLLESMDVLHRTYSAPAINAIQGGAFESPKKEKRPHRRWRSRAIGKDAKGTLQVPKPFSGPVRLHSSNPNLSTLDFGEEKSYSDGSEASSEFSKMQEDLCHVAHKVYFALRSAFNSISVEREKLKQLMELDTSPSPSAQVVGLKHALSSALAQNTDLKERLRRIHAESLLLDPPAVPKPGDNLAEENSRDEGRALVHQLSNESRLSITDSLSEFFDAQEVLLSPSSSENEISDDDSYVSDISDNLSLDNLSNDLDNERQTLGPVLESSGEARSKRRTSLPAPGPNTSSVSLWSILRNNIGKDLSKVAMPVELNEPLNTLQRLCEELEYSELLDKASRIPSPLERMVYVAAFAISAYASSYFRAGSKPFNPVLGETYECIRQDKGFQFFAEQVSHHPPISACHAESGNFVFWQDVRWKNKFWGKSMEIVPIGTTHVTLPAFGDHFEWNKVTSCIHNILSGQRWIEHYGEIDIKNLNDDSCHCKVNFIKAKYWSTNAHEIEGTVFDRSGKAVHRLFGKWHESIYCGGASSSTCVWRANPMPKGYEQYYGFTQFALELNEMDPLSRSLLPPTDTRFRPDQRLLEEGNIEEAEVQKQRIEKLQRERRRVLEENGVEHQPRFFRKSSDDAWVSNGTYLELRKDLGFSKLDHPVLW

>NP_056365.1_ORP3_Homo_sapiens
MMSDEKNLGVSQKLVSPSRSTSSCSSKQGSRQDSWEVVEGLRGEMNYTQEPPVQKGFLLKKRKWPLKGWHKRFFYLDKGILKYAKSQTDIEREKLHGCIDVGLSVMSVKKSSKCIDLDTEEHIYHLKVKSEEVFDEWVSKLRHHRMYRQNEIAMFPHEVNHFFSGSTITDSSSGVFDSISSRKRSSISKQNLFQTGSNVSFSCGGETRVPLWLQSSEDMEKCSKDLAHCHAYLVEMSQLLQSMDVLHRTYSAPAINAIQGGSFESPKKEKRSHRRWRSRAIGKDAKGTLQVPKPFSGPVRLHSSNPNLSTLDFGEEKNYSDGSETSSEFSKMQEDLCHIAHKVYFTLRSAFNIMSAEREKLKQLMEQDASSSPSAQVIGLKNALSSALAQNTDLKERLRRIHAESLLLDSPAVAKSGDNLAEENSRDENRALVHQLSNESRLSITDSLSEFFDAQEVLLSPSSSENEISDDDSYVSDISDNLSLDNLSNDLDNERQTLGPVLDSGREAKSRRRTCLPAPCPSSSNISLWNILRNNIGKDLSKVAMPVELNEPLNTLQRLCEELEYSELLDKAAQIPSPLERMVYVAAFAISAYASSYYRAGSKPFNPVLGETYECIREDKGFQFFSEQVSHHPPISACHAESRNFVFWQDVRWKNKFWGKSMEIVPIGTTHVTLPVFGDHFEWNKVTSCIHNILSGQRWIEHYGEIVIKNLHDDSCYCKVNFIKAKYWSTNAHEIEGTVFDRSGKAVHRLFGKWHESIYCGGGSSSACVWRANPMPKGYEQYYSFTQFALELNEMDPSSKSLLPPTDTRFRPDQRFLEEGNLEEAEIQKQRIEQLQRERRRVLEENHVEHQPRFFRKSDDDSWVSNGTYLELRKDLGFSKLDHPVLW

>XP_002605382.1_hypothetical_protein_BRAFLDRAFT_74202_[Branchiostoma_floridae]
MTMKRVCFRSQDEVILLPAAPSVDDSTGNHPRPPRKPLVTGERKYAFQNQKSRYGLPPPSTLAVEKQPHHMSTPNISSAKKVYVAETTPTSPTSQQRSEEMRLRQEFVNNAKEAPPVDGTSAQDGTARLSLKSTSDKSTSGSSKETPSPKKEKDSPDLEKGEWEIVEGLKTGTTVEKSTPSKYEGFMLKKRKWPLKGWHKRFFVLEKGFLKYAKRLQSVQRGKLHGSIDVGLSVMSIMKDARRIDLDTEDSIYHLKLKSHDLFNIWVSKLREHRLWRQNEIASGGSDSKYNSDVFSTPLSPETPPLIRNRRLSMPRTMSRSSSALGQGRVAAWLMESEAMEQCNKELSSVQTKVYQLNSILQEFTLVYVFVTELSSVQTKVYQLNSILQEFTLVYVFVTELSSVQTKVYQLNSILQEFTLVYVFVTELSSVQTKVYQLNSILQEFTLVYVFVPELSSVQTKVYQLNSILQEFTLVYVFVTELSSVQTKVYQLNSILQEFTLVYVFVTELSSVQTKVYQLNSILQEFTLVAVFCADQGLPVEQYSTGVKTYLKYVFVTELSSVQTKVYQLNSILQELQRLQSSLDDQYKYLDLSVPDLASKKKSWRLSFRKSKHKKSMSHGGSSTASTSSTASVSSNRNSTGAITGAMLPPPSTLAVEKQPHHMSTPNISSAKKVYVAETTPTSPTSQQRSEEMRLRQEFVNNAKEVYSQLKVLTLTLRSERDKLQDAMGQQVLSPAHGGHADRLGTVLAQVQAQNADMRARLNRIAREADLSTVQTPGGTLDQKTPLLQRQFSGDDHLSLSTADSVTEFFDAEEFLISSSSSDGPPILAQFRHTWPRPKLTQSHPADGPAILHTPVYSRTTCSVVIYESYLYEVHMGMDQETEYPQEDPGMSQTGHRAQLPCPKPETGDLSIWSIMRKNIGKDLSKVCMPVTMNEPLNTLQRLAEELEYSELLDKAAETDNPYERMALIAAFAVSGYSSTYYRAGQKPFNPLLGETYECVREDKGFSFIAEQVSHHPPISACHCKGEKWVFWQDARLKTKFWGKSMEIIPIGTVNVSIPKYNDHYTWSKVTSCIHNIMTGQRWMDHYGEKIIKNKDITCKLMFHKASYWSTRCHDVLGSVLDKDGKEIHHLFGKWHEGLWCGHAPSAKCIWRPGSMPEEYDLYYGFTRFAVELNELTPDLKTALPPTDTRFRPDQRLLEEGQVQRAQNEKVRLEQMQRMREREREEAGVVYQPRFFRLLEEGQVQRAQNEKVRLEQMQRMREREREEAGVVYQPRFFSFLVENVRARGHALKQSGPEAWHPNKRM

>XP_002110413.1_hypothetical_protein_TRIADDRAFT_21915,_partial_[Trichoplax_adhaerens]
QRRCILPAFKNPRNDISIFGLLSKNIGKDLSKISMPVSMNEPLSALQRQCEELEYSDLLDKAAMTDDVVERMAYVAAFAVSAYNNSHYRAGQKPFNPILGETYETIRGDRGFNFIAEQVSHHPPISACHADSERWKFWQDTRLKNRFWGKSLEIFPVGSVNLTIHKYNESYKWNKVTACVHSILRGQRWIEYYGDMIIKNSVNRLTCKLTFNKGGSFNNKKCDVKGQILDSNGKTIQTLFGKWNEGLYLGQPSSAICLWRPGIMPPNYENYYGFTKFAMELNEIEPDHPEILPSTDSRFRTDQRYLEEGNLAAAETHKLRIEELQRKARKAREAAGHKWTPRFFE

>NP_010265.1_oxysterolbinding_protein_related_protein_OSH2_[Saccharomyces_cerevisiae_S288C]
MSREDLSIAEDLNQVSKPLLKVKLLEVLGQGDFKHLKALVDNEFQPKDDPSVQQVLNLILHYAVQVAPILLIKEIVAHWVDQVGDEKSSSKSDDGIHLDLNYQDENGNTPLHLAAAQSRSDVISFLLSQKSINDCVKNKAHQQPLDMCKDLNVAQMIQLKRDDYFLETVHSLRAAMNKRDFSKLDSIWKNPRNLNLLDINGIDPETGTTLLYEYSQKKDIEMCQWLLKHGAEATVKDGKGRSPLDLVKNIKLPAKPSNNVTPEIKLKNLLEKNLREQAIVHEDVASSKPPTYKGFLKKWTNFAHGYKLRWFILSGDGNLSYYKDQSHVDRPRGTLKVSTCRLHIDSSEKLNFELLGGITGTTRWRLKGNHPIETTRWVNAIQSAIRFAKDKEILNKKKAVPPSLALKNKSPALISHSKTQGSLPEASQYYQHTLHKEVIQPSSVSLYRRPSNNLSVVSSEIQLNDNLTESGKRFVSKMIENRLDGSKTPVGVHTGSALQRVRSSNTLKSNRSMQSGSGVASPIDKVPNGANLSQSNTTTGSTASLSDNNYIDNFEGDEANSDDEEEDLGINFDRDEEYIKAQYGPYKEKLDMYEQAISIELSSLIELIEQEEPSPEVWLTIKKSLINTSTIFGKLKDLTYKRDKRLVDMVSKQGDVNNVWVQSVKELEMELSNKTERLASIDKERRGLKKILHKKLLESHATAGNKESLENDKEQESDTTASTLGQIAKFISATKEEDEASDADEFYDAAELVDEVTELTEAHPEISTAAAPKHAPPPVPNETDNDSQYVQDEKSKIESNVEKTSQKFEKQNNLVTEDEPKTDQSLKNFKAEDKESQVKEKTKEIASSVIGEKTIVAVTTVQKRKEEYLLKEGSYLGYEDGIRKRLSMDKDDRPKISLWAVLKSMVGKDMTRMTLPVTFNEPTSLLQRVAEDLEYSELLDQAATFEDSTLRTLYVAAFTASSYASTTKRVAKPFNPLLGETFEYSRPDKQYRFFTEQVSHHPPISATWTESPRWDFWGESFVDTKFNGRSFNVKHLGLWHIKLRPNDNEKEELYTWKKPNNTVIGILIGNPQVDNHGEVNVVNHTTGDHCKLYFKARGWRSSGAYEITGEVYNKKKQKVWILGGHWNEAIFAKKVVKDGDLSLEKTRTAASAGNGPTDDGTKFLIWKANDRPEEPFNLTPFAITLNAPQPHLLPWLPPTDTRLRPDQRAMEDGRYDEAGDEKFRVEEKQRAARRKREENNLEYHPQWFVRDTHPITKAKYWRYTGKYWVKRRDHDLKDCGDIF

>NP_009421.3_oxysterolbinding_protein_related_protein_SWH1_[Saccharomyces_cerevisiae_S288C]
MEQPDLSSVAISKPLLKLKLLDALRQGSFPNLQDLLKKQFQPLDDPNVQQVLHLMLHYAVQVAPMAVIKEIVHHWVSTTNTTFLNIHLDLNERDSNGNTPLHIAAYQSRGDIVAFLLDQPTINDCVLNNSHLQAIEMCKNLNIAQMMQVKRSTYVAETAQEFRTAFNNRDFGHLESILSSPRNAELLDINGMDPETGDTVLHEFVKKRDVIMCRWLLEHGADPFKRDRKGKLPIELVRKVNENDTATNTKIAIDIELKKLLERATREQSVIDVTNNNLHEAPTYKGYLKKWTNFAQGYKLRWFILSSDGKLSYYIDQADTKNACRGSLNMSSCSLHLDSSEKLKFEIIGGNNGVIRWHLKGNHPIETNRWVWAIQGAIRYAKDREILLHNGPYSPSLALSHGLSSKVSNKENLHATSKRLTKSPHLSKSTLTQNDHDNDDDSTNNNNNKSNNDYDDNNNNNNNDDDDYDDDDESRPLIEPLPLISSRSQSLSEITPGPHSRKSTVSSTRAADIPSDDEGYSEDDSDDDGNSSYTMENGGENDGDEDLNAIYGPYIQKLHMLQRSISIELASLNELLQDKQQHDEYWNTVNTSIETVSEFFDKLNRLTSQREKRMIAQMTKQRDVNNVWIQSVKDLEMELVDKDEKLVALDKERKNLKKMLQKKLNNQPQVETEANEESDDANSMIKGSQESTNTLEEIVKFIEATKESDEDSDADEFFDAEEAASDKKANDSEDLTTNKETPANAKPQEEAPEDESLIVISSPQVEKKNQLLKEGSFVGYEDPVRTKLALDEDNRPKIGLWSVLKSMVGQDLTKLTLPVSFNEPTSLLQRVSEDIEYSHILDQAATFEDSSLRMLYVAAFTASMYASTTNRVSKPFNPLLGETFEYARTDGQYRFFTEQVSHHPPISATWTESPKWDFYGECNVDSSFNGRTFAVQHLGLWYITIRPDHNISVPEETYSWKKPNNTVIGILMGKPQVDNSGDVKVTNHTTGDYCMLHYKAHGWTSAGAYEVRGEVFNKDDKKLWVLGGHWNDSIYGKKVTARGGELTLDRIKTANSATGGPKLDGSKFLIWKANERPSVPFNLTSFALTLNALPPHLIPYLAPTDSRLRPDQRAMENGEYDKAAAEKHRVEVKQRAAKKEREQKGEEYRPKWFVQEEHPVTKSLYWKFNGEYWNKRKNHDFKDCADIF

>XP_011392785.1_oxysterol_binding_protein_1_[Neurospora_crassa_OR74A]
MSETGESLHKRSKSAARSLLSRRKPPVDDDMASDDGRRASGSYSTPQNIQIPSQQASRGHSSRLSTTGSVLGRTVSNHQASPSVGGARSPSMLFDKGAAASLESSVRKFRIVEALRNGDTASISRAIRDTAEHNPRMSISSAITGPLEDTTILHLAIQCAEQTVVEYVLSDGAGSLDINARDKDGNTPLHIAAQQGRTHIVRQLLEHKDINDAIANHQGRLPIDLARNPDIFQQLQLARSLFAEDKVRQVQDLILHGDFKTLEEVLEEPRFKTVLDINSTEFAAESATVESGGTLLHEAARRRNTKLIQVLLLHGADPFRRDRNGKLPQDVTKDEITKAMLKKSPAAVAAQRGIQEKAVLGSATHGAAAAASGDPMAGREAREMKGYLKKWTNYRKGYQLRWFVLEDGVLSYYKHQDDAGSACRGAINMRIAKLHMTPDEKTKFEIIGKNSVKYTLKANHEVEAKRWFWALNNSIQWTKDQAKEEERQRVRNAELLKQAKAEHAHSVSDAGSDNASFVEHRRQSVQLSRMHSTARASRASYVASGNGSNEEDDFVDAGTEADKGEHHHADDDDDDYGEGSSGQDVPSANKDAFNITAQSARLQLDTMAQVTAALMAETNKNSDLRLSDPKASQALATYDAAIRSLTGLVGDLLRISKDRDAYWQYRLDRESEMRQMWEESMAQVAREQEALEARVGEAEAKRKITKRILKEALGSGIIDEGQVKATAPTVAAAAEATDEADAEQADARPQSPVQSIRRQKTIRDQVAELSDSDSDEEEFFDAVDAGTVEVSQLPPSEPVASQSDTQLVISDGTDISDSFKGYENGIRTKLKMDADNRPTISLWGILKSMIGKDMTKMTLPVSFNEPTSLLYRCAEDMEYADLLDLAADRADSIERLIYVSAFAASEYASTIGRVAKPFNPLLGETFEYVRPDKNYRFFIEQVSHHPPIGAAWAESPKWTYYGESAVKSKFYGKSFDVNPLGTWFLKLRPTSGGKEDLYTWKKVTSSVIGIITGNPVVDNYGVMEIKNWTTGEVSYVEFKPRGWTKSSAYLIGGKILDANGQVRVSLGGRWNSKFYARLTPGYEATIEEKSGNETVHQGSINDPSKAFLIWQANPRPTGIPFNLTPFVVTFNHLDDNLKPWLAPTDSRFRPDQRAMEEGEYDFAATEKNRLEEAQRARRKARESKGEEFKPAWFTKARCEITGEEYWQFNGEYWNRRAKAGPNGDPSAWQGLEPIFQDA

>CEL97051.1_unnamed_protein_product_[Vitrella_brassicaformis_CCMP3155]
MVCECDFDMSELDRHSETCNITVTPYVLHQGELMKWTNYVKAWRPRHFTVELGVLKYSHEKGGPLRDSFALSECGLSLCHGDAHRFEIATPRGRVTLKAASKEDKERWLDALTKAKGGLHNASLKPPARTTDGSLPNYSPTPSIEATDDDNSTVPQLTFVEQLGETRTRLRDKMHDYAKHHEMAIRIVGELEDEAAQQQVTECLDQMKSILWTIEALSDQQFSQAEAWAKKETRRHMALENTFLHIGKENHQLARAASRLGSKEGGVLNADEEEEEGEWDDYEDFFDAAEKLIDESTAAAAGASPLVYRPDYGTVSSSAAVVSNGSQPAGGIQRRTRLPVPRAEIKVSLWNILKEFIGKDLSRISMPIFFNEPTSFLQRLAEDLQYTALVRTAASLTDPLERLVYMAVFSVTPFASTVGRFVKPFNPLLGETYEITHRGFRFIAEQVGHHPPVSAYHAESDDFVIWGHVHLKNRFIGKSVEAIPSGSIHCVLPRVAEADHFTWARPHMVVHNILFGRLWVEWYGTVLVTNHSTGDVAIIELLRKGWFDKKMHQLRGVVQDKHGRTHWLLGGSWSAEVWAERCDPGPIPSDGNSRPTPTPPHPQHTSPEQEPLLQHHVRGSTSSSLMSEASGQVDGSATQDPSSAAAKRARGRKGSSSSQHSYHHHPPPVGSMPIPEVDWESIQSDPSTRRVLWSPTPLPAHAEQYFNYSQMAMELNEITPEYDRQAGAHMPRTDSRFRPDQRAYEEGRLDEASSEKTRLEDRQREAAKKRPRGEQDYSPLWFQRSRDKYTGEATWAFRGSYWEKKRHNDFKHCPHIFGTTH

>XP_014156700.1_hypothetical_protein_SARC_04931_[Sphaeroforma_arctica_JP610]
MACYFGHREVVEILIGHEADVNIQNDSGDTALHKAALTGRGDIVQCLLARGADTRIKNATGELPATLAQTKELKDELTNATQVQRHRRESVFLEAARKGDIQEFETEYKRSTCLDINCADDMGNTPLHLAANRGHKDLVVWLLQNGARSLRNAAGKTPAEIAYSDQLRQLLESLSSSVGMRGILFRFHTVLRRWRKRGVVLRKGMLRFYQVSGNNDFEDLIDVYTLSKHSVIDVTNESIFEFVVETKTSKLKLRAETEHELARWMASFQQYSGDITIKGFTKTHVHTHAHASPHPNAVHMSLEAIPELLVSAAKLRQSVAELVKDAEVKALELPEGLERDSAVAVAQQFEVPLRQIHTLISSLGDVTTTLSQKEKMWAHELQRERQARVILEESLKVLAVQHNDLETIADIDHALLREAGGGDADGSEAFYDAVSVIDANEPRVSIPEIEPSRTRPPRTTLPAPQTDQAALSVWSVLKQSVGKDLTKISMPVVWNEPLSLLQRLSEDLEYHSLLKMGSDVVAGKTPSSPLLLCSTESERAQTQMLYVAAFAASTYSSTSHRVGKPFNPLLGETYELVLGSNRLVCEQVSHHPPISAIHAEGETYEIHGWSDVKTKFWGKSMEVLQRGGQHLRFKSPDSTVPGHHYSWNKVTTSVNNIIIGKLWLDNHGLMTITNHTTGDTCELDFKQSGWFNKNMFCVEGRVLDSQGNSVYHISGKWNESLWAWPSTATKISLPELKNAVRIWQIHAPLPDKERMYNMTRFAVTLNEMPADPSELARTDCRLRPDQRCLEEGDVEKAADEKVRLEEKQRAARKIRAETGEVHKPMWFEEVYDDVFQATGYRPTGEFWRAKHEASTKWSDIY

>XP_011387069.1_hypothetical_protein_UMAG_01115_[Ustilago_maydis_521]
MGGKDERKSSRPQRGFPVDNRKIDELDVVYSGWILKKKRKKMQGYAKRFLVLTNQGILTYAISPEKATRDAIEIPHASVTSSMRHGTIHVDSGSSVFHLKALSPQDFEAWRSHLRSFIPERPVGSLQRLYVSNGSDLQAIDLTEVWTRLDQTSALVEDLATHSTALKNKGSSAADAIMGALGAKSNGKDDVAAFHATAEKLVTEFEQLKTEIESKIPRVDQNAGTMRSMSGSSDISGFGGSMSRSKRMSVSSLATTGTDSAIFYDADSHGEELFMDDDAKGYDEGNTSRSESSDAEGTDSEAEESQQDTDETRTLSDSGAGGGGKVVQYRKKLPAKVSGDEVSLFSMLKKNVGKDLSTISFPVSFNCPLSLLQAAAEEYEYASDLLDRAGRCEDWVERICLVGAFAVSGYASTKLRASRKPFNPLLGETFECVREDKHWKFLAEKVVHQPPVVAFYAEGKGWKAQGWSAVKNKFWGKSLELIPEGQIRLEFGDGDVFSIQKPSSFMRNLLAGNKYLEHVGELTVTNESTGQRAVIEFKEGTMWGGAASRNGVEGKIYDANDSTVTTLKGKWSDSLARQKDKDNYQMLWEANEMPPYAEDYYGFTYFAMSLNELSEDCKDVLAPTDSRLRPDQKAFEEGDVDKAEQLKHKLEEAQRARRKQLESQAKTYTPKWFHKSDDAPGWLYGGSDGSDYFKIRKKAAENGKDAVWNEAHVPNVFDV

>XP_004996199.1_uncharacterized_protein_PTSG_02701_[Salpingoeca_rosetta]
MTEAVHKEGYLLKWTNYMKGFQRRYFVLDGRSLAYYRSPSEMAQGCRGSLNLLDAKIETAPGNNLVIQPGGKRTGQVFHLRANSDRERQDWINALQLAKQMASNLRQANRKSGSTRDLRRAVSSLLDEVSQRETRWAKALTSSEKRRNDLEAALESLARDHRRLERSAEIAAEKGLVVDAAELEEETERNEEEEDEFFDAQSDLSTSGKSSRRLSGPPASALVGHAHRGKPFEFRRAIPFKPNKRVSLWGIMKNCIGKDLSKIPMPVNFNEPISFTQRLSEDLEYAHLLDKAAKATSSQQRMVYVAAFTVSSFSSGADRTGKPFNPLLGETFELDRRHTKGWRALLEQVSHHPPIAAFHSESDDWIFWQEFSMDSKFRGKYLEVIPTGVSHLILKKTNDHFTWTKVKTTIHNIIIGKLWLENNGTMDIVNHTTKDVCTLEYMRYSLFSSNELHSVRGEVKDKSGAVSFCLEGKWHSSLSVYSPETPKDKHVIWERTPPIPDFEQMYGFTQMAIESNEISPYERGCAMTDSRFRPDKNLMEVGEWDMANRVKHLLEEGQRFRRREYERTKTKWTPAWFELQPDPVDPNKKRFQYKGGYWEAKEKSRFGDHGIVDVYDIRPVEQKDMDAARAAKGAMVINDHSELADE

>XP_001742324.1_uncharacterized_protein_MONBRDRAFT_17243_[Monosiga_brevicollis_MX1]
MRTSIPFRPDKTTSLWSIMKNCIGKELSKIPMPVTFNEPISFTQRLSEDCEYAHLLDEAAATTDPYHRAALVSAFTISSFSSGAWRTGKPFNPLLGETFELDRRATHGYSCILEQVSHHPPICALHATSERGWTFWQDFSMNSKFRGKYLEVVPTGISHIIFHDNDDHFTWTKVSTTIHNIIVGKLWLENAGKMLVTNHTTGVVCELDYKPYSFFSSAEPRTVVGQVKDVSGKVHLTLNGTWDKQISQEAPGESLTPLTMCPEQASDLKADDANGISKRVLWKRTEHVANFEKMYGFTQMAIESNQIGVFEKGCAVTDARFRMDKNVMEQGDFDMANRVKHLLEEGQRFRRRQYEKTQTRWTPCWFELRDDPVVPGRKSHQYKGGYWEAKDSNNFGAHDIVDIYDISPVASKDPKAAEAADQAKTMNVTY

>XP_011270737.1_hypothetical_protein_CAOG_09049_[Capsaspora_owczarzaki_ATCC_30864]
MSSAPESPLLRGFDGNVVQLPPDQPLDGDEFSGWLLKWTNYMSGWRERWFILKGGALSYYRSKEEVTETCRGTVSLVGAQITPDDRLGIDVATSTQHFHCRAHSEPERARWIMALELAKVKAQSRAAGKHHHGAGAAGASGGLTASPRRSSNGAHGSNSSNSSSSSSSHVPAPPAFSLSGGAAGGKPATILGAASSSLASRPRIVGLVGQQIDYESDEEDEGAASTSIDEAAFLQSVKQAFSEVKLRSELLFKQAIGLQRSCTTVEASLGAVSDASIEASRKSSSNASLPTASSPTLATAASAARPHTPELLLNGAVAPADAVAHIRQLQEDAAMFKITAAAMVDACSSYVHNIEQHHGEWTKILLAERSRFTSLAETVETLAKQHNVLERRATLVASGKTFHTHVEMDDEEVFFDAADDEDEFFAAEDEDAPATTTTATAAPATTTATHTTATHTSPAAASTLASTAAANSRAPSTAAPTAAVVPTARRRRERIPYRPQTSASLWGVMKDCIGKDLSKIPMPVFFNEPLSFLQRLCEDLEYADLLDSAAKATSSTERMAFVAAYTMSSYANTTTRTGKPFNPLLGETYELDMRAEKGWRVITEQVSHHPPISAMHTEGRGWTLWQDFGMISKFRGKYLQIVPVGITHLTFENGDHYTWRKVTTTVHNIIVGKLWIDQHGEMEIVNHTTKERCSMKYYAYSYFSSEKPRKVTGEVMDETGKCKIELLGTWDESLESRPPGTNLPGKQLWKRGTLPVDSAKMYGYTKFACLLNEPEQNVCPTDSRLRPDQRKMENGMFEEADTEKLRLEEKQRAVRKQREASGETVQPRWFARRYQPLTDADEFVYSGGYWEAKEAKNWTNVPDIF

>NP_477271.1_oxysterol_binding_protein_[Drosophila_melanogaster]
MTDAAGNALAEKGLPEMKGWLLKWTNYIKGYQRRWFVLSKGVLSYYRNQSEINHTCRGTISLHGALIHTVDSCTFVISNGGTQTFHIKAGTEVERQSWVTALELAKAKAIRAIECEEEEETETAHVVPSQEISSVVRDLTDRLESMRTCYDLITKHGAALQRALNDLETNEEESLGSRTKIVNERATLFRITSNAMINAGNDYLHTAEAQGHKWSKMLHHEREQRQRLEEIIEQMAKQQSQMEQAAVLVRQNKPVSSTSGAGTAGSLVTSDEEMEFFDAEEHGYSGSGRSPESSDCERGTFILKMHKRRSSSEDQVEGHLEGSSSESDEQKRTVQTVQQVCLVSAPRVASGGQGDDDDDVDKALPAKESTDSIYGRNWNPDLIKKRRDRVPDKPNHPISLWGIMKNCIGKDLSKIPMPINFNEPLSMLQRLVEDYEYTEILDYAATCQDECEQLAYIAAFTVSAYATTTNRTGKPFNPLLGETYECDRMDDYGWRCLAEQVSHHPPVAALHCESKNWTCWQEFSMTSKFRGKYVQINPLGGVYVQFPNSGRRYSWRKVTTTVNNIIVGKLWVDQHGEMEIRGSQAAEGHKCILNFIPYSYFSRDVQRSVKGVVMNKDNEVKWVVRGTWDMKIEIAPVLKTSGSVSSPTYTTGEFKLAWRRRPAPPDSDKFYNFTTLACQLNEEEEGVAPTDSRLRPDQRLMEQGDWDESNKEKLRLEEKQRTERRRRENEAEEAAAEGRPYPAYEPMWFKREKEEGSEEYVHVFKNTYWEAKAAQNFEGCPDIY

>XP_002114493.1_hypothetical_protein_TRIADDRAFT_27761_[Trichoplax_adhaerens]
MPDGRVYPDNFSGWLYKWTNYIKGYQKRYFVLCNGLLSYYRNQAEMAHTCRGTINLAGAHIYTEDLFNFVVSNGSTQVFHLRAANEVERQRWVTALELCKASAIKLLELGDEEDVGKIEIAPYVRSLGNKMKELQTRHELVVSHLSSFQRSISEILVDGTENDNALITISDKASMFKITAVDLAKACEEYLSLAQSQERRWQQAIDFERQKRATLEESLETLAKQMNHLETRLRAQNKISRSSSIKGHDLAMNTSDDESDNEFYDATDVTVDVPANTPLIKPSVSVSSTSSQPSANINTETEEECDGAEANLALNFFNGKRIDVLLRDRIPEKPNIRLNLWSILKNCIGKELTKIPLPVNFNEPLSFLQRLTEDLEYSEILDRAAACDDPCEQLAYVAAFTVSSYANTTYRISKPFNPLLGETFEYDRRSDLGWRSLCEQVSHHPPASAQYVEHKDWVLWQDFSMTSKFRGKYIQIIPQGIAHLVFPKSGNHYTWRKVTTTIHNIIVGKLWVDQSGEMEITNHSNRDKCYLKYSAYSYFARDTPRKVSGQVVDAKRLVRYVINGTWDNKIEYAKVIDPIPLEEYYNAVKSGKPPPTTQSTLSWQKNSLPPGRENMYGFAPLTCSLNAPVDGIAPTDSRLRPDQRCMEKGDFDGANSEKLRLEEKQRGKRHKYEAMVTSAKESGNLPPKPFEPIWFKKVFDEFCNRDVHVYRGNYWESRDVQDFSSSPDIF

>XP_014156837.1_hypothetical_protein_SARC_04782_[Sphaeroforma_arctica_JP610]
MIRSLTSNCWFYRAVLKNNIGKDLSKIPMPVMMNEPLSMLQRLSEDLEYSHLLDKAAKCTTTHERMCYIAAYTVSSYATTYYRTNKPFNPMLGETYELDLSQDKSYGWKTIAEQVSHHPPIAAMHTESNEWEMCQQFSMSSKFRGKYLSIIPTGVSWIRFKKTNEKYSWTKVTTCVNNIIIGKLWIDQYGDMVIKSHTTNDVAKIKFVPYSYFSNTTPRSVVGTVEDGNGNVAYNLNGTWDISMSHSPVNDPKNITTAWTVNKLPDNADKMYGYGYFACVLNDPQGAVGVAPTDSRLRPDLRALDSQVYDLAEAEKLRLEEKQRTTRKYREQQGISYTPAWFKPTMDPDTERPIHAFTGEYWKQKEAGDWSNSNLIY

>NP_001367300.1_Oxysterolbinding_protein_[Caenorhabditis_elegans]
MSSTSSGKSRRAASLSSINNFEHLASVEKAGWLNKWTNYLKGYRQRWFVLDSNATLSYYRNPSEVGHTCRGSINLQEARVHTDKTTSCIVISGQSQTFHVKPQNEMDRQQWTNSLEYMRHKAITRAESEEDEDAQMAKTDSNRSDALILANRQMSGKLCDLRTAANMMNKQGDELMRALNGTVETDKNSLAERADLLKMTTSAVLQAAEEFVELSEQSAKRLNKIVAVEQKEKALLQEQLEALAKQHSSLERAASKCARGAAPVSVYSDQEDDEFHDAEEDLAMPCSNSNGPPATAGVHLTPTKRHIGAGDPSSSTCSDSGAVVVVGAHKGGRQRRTTVPERPNLPINLWSIMKNCIGKELSKIPMPVNFSEPISVLQRVTEDLEYANLLETGAKLSTLEQMCYVAAYAASNYSTTCHRTNKPFNPLLGETFEFDRMDDLGWRSVTEQVSHHPPAAAHHAEGNGWTMYQDFTMTSRFRGKYLSVIPIGFTHVVFPATKSHFSYRKITTTVHNIIVGKLWIDNHGDMEITNHETNEKCLLKFVPYSYFSREQPRKVYGIVRDAEGIPKYVVQGTWDKSIDMLKVSSWNGNHEKPKLEVDETSLKRIWTANPLPKNAEKMHNFTKLAIELNEPEEGVAPTDSRLRPDQRLMENGEWDEANRKKLEIEEKQRVVRRRREAEKELAMKKGDKYEEYEPTWFVRVQDESNGALIHQFKGGYWEAKEQQNWEKCPDIF

>NP_499448.1_Oxysterolbinding_protein_[Caenorhabditis_elegans]
MPSLSEFLRKRRARQRRLQAVPSNNKKKSNNNNIMSSTSSGKSRRAASLSSINNFEHLASVEKAGWLNKWTNYLKGYRQRWFVLDSNATLSYYRNPSEVGHTCRGSINLQEARVHTDKTTSCIVISGQSQTFHVKPQNEMDRQQWTNSLEYMRHKAITRAESEEDEDAQMAKTDSNRSDALILANRQMSGKLCDLRTAANMMNKQGDELMRALNGTVETDKNSLAERADLLKMTTSAVLQAAEEFVELSEQSAKRLNKIVAVEQKEKALLQEQLEALAKQHSSLERAASKCARGAAPVSVYSDQEDDEFHDAEEDLAMPCSNSNGPPATAGVHLTPTKRHIGAGDPSSSTCSDSGAVVVVGAHKGGRQRRTTVPERPNLPINLWSIMKNCIGKELSKIPMPVNFSEPISVLQRVTEDLEYANLLETGAKLSTLEQMCYVAAYAASNYSTTCHRTNKPFNPLLGETFEFDRMDDLGWRSVTEQVSHHPPAAAHHAEGNGWTMYQDFTMTSRFRGKYLSVIPIGFTHVVFPATKSHFSYRKITTTVHNIIVGKLWIDNHGDMEITNHETNEKCLLKFVPYSYFSREQPRKVYGIVRDAEGIPKYVVQGTWDKSIDMLKVSSWNGNHEKPKLEVDETSLKRIWTANPLPKNAEKMHNFTKLAIELNEPEEGVAPTDSRLRPDQRLMENGEWDEANRKKLEIEEKQRVVRRRREAEKELAMKKGDKYEEYEPTWFVRVQDESNGALIHQFKGGYWEAKEQQNWEKCPDIF

>NP_001367172.1_Oxysterolbinding_protein_[Caenorhabditis_elegans]
MVPNHCVMLDDMQKAAASGISGKNEKKRRAKIDSNEENDDISKRRQNGGNGEIRRDEEKAEKSGDKDPPRQFPSLLTSCSSFYSSSPSTSTYCSLSSLSPSSLPPPLQKSTKIHRRIMGTLRGRLRQARKQITWCAFPVRARRKAHHRDDESVYESACGDSEKLFGLQERNPSEVGHTCRGSINLQEARVHTDKTTSCIVISGQSQTFHVKPQNEMDRQQWTNSLEYMRHKAITRAESEEDEDAQMAKTDSNRSDALILANRQMSGKLCDLRTAANMMNKQGDELMRALNGTVETDKNSLAERADLLKMTTSAVLQAAEEFVELSEQSAKRLNKIVAVEQKEKALLQEQLEALAKQHSSLERAASKCARGAAPVSVYSDQEDDEFHDAEEDLAMPCSNSNGPPATAGVHLTPTKRHIGAGDPSSSTCSDSGAVVVVGAHKGGRQRRTTVPERPNLPINLWSIMKNCIGKELSKIPMPVNFSEPISVLQRVTEDLEYANLLETGAKLSTLEQMCYVAAYAASNYSTTCHRTNKPFNPLLGETFEFDRMDDLGWRSVTEQVSHHPPAAAHHAEGNGWTMYQDFTMTSRFRGKYLSVIPIGFTHVVFPATKSHFSYRKITTTVHNIIVGKLWIDNHGDMEITNHETNEKCLLKFVPYSYFSREQPRKVYGIVRDAEGIPKYVVQGTWDKSIDMLKVSSWNGNHEKPKLEVDETSLKRIWTANPLPKNAEKMHNFTKLAIELNEPEEGVAPTDSRLRPDQRLMENGEWDEANRKKLEIEEKQRVVRRRREAEKELAMKKGDKYEEYEPTWFVRVQDESNGALIHQFKGGYWEAKEQQNWEKCPDIF

>NP_001370121.1_Oxysterolbinding_protein_[Caenorhabditis_elegans]
MDRQQWTNSLEYMRHKAITRAESEEDEDAQMAKTDSNRSDALILANRQMSGKLCDLRTAANMMNKQGDELMRALNGTVETDKNSLAERADLLKMTTSAVLQAAEEFVELSEQSAKRLNKIVAVEQKEKALLQEQLEALAKQHSSLERAASKCARGAAPVSVYSDQEDDEFHDAEEDLAMPCSNSNGPPATAGVHLTPTKRHIGAGDPSSSTCSDSGAVVVVGAHKGGRQRRTTVPERPNLPINLWSIMKNCIGKELSKIPMPVNFSEPISVLQRVTEDLEYANLLETGAKLSTLEQMCYVAAYAASNYSTTCHRTNKPFNPLLGETFEFDRMDDLGWRSVTEQVSHHPPAAAHHAEGNGWTMYQDFTMTSRFRGKYLSVIPIGFTHVVFPATKSHFSYRKITTTVHNIIVGKLWIDNHGDMEITNHETNEKCLLKFVPYSYFSREQPRKVYGIVRDAEGIPKYVVQGTWDKSIDMLKVSSWNGNHEKPKLEVDETSLKRIWTANPLPKNAEKMHNFTKLAIELNEPEEGVAPTDSRLRPDQRLMENGEWDEANRKKLEIEEKQRVVRRRREAEKELAMKKGDKYEEYEPTWFVRVQDESNGALIHQFKGGYWEAKEQQNWEKCPDIF

>NP_001122730.1_Oxysterolbinding_protein_[Caenorhabditis_elegans]
MPCSNSNGPPATAGVHLTPTKRHIGAGDPSSSTCSDSGAVVVVGAHKGGRQRRTTVPERPNLPINLWSIMKNCIGKELSKIPMPVNFSEPISVLQRVTEDLEYANLLETGAKLSTLEQMCYVAAYAASNYSTTCHRTNKPFNPLLGETFEFDRMDDLGWRSVTEQVSHHPPAAAHHAEGNGWTMYQDFTMTSRFRGKYLSVIPIGFTHVVFPATKSHFSYRKITTTVHNIIVGKLWIDNHGDMEITNHETNEKCLLKFVPYSYFSREQPRKVYGIVRDAEGIPKYVVQGTWDKSIDMLKVSSWNGNHEKPKLEVDETSLKRIWTANPLPKNAEKMHNFTKLAIELNEPEEGVAPTDSRLRPDQRLMENGEWDEANRKKLEIEEKQRVVRRRREAEKELAMKKGDKYEEYEPTWFVRVQDESNGALIHQFKGGYWEAKEQQNWEKCPDIF

>XP_032241874.1_oxysterolbinding_protein_1_isoform_X1_[Nematostella_vectensis]
MDELLGYTIVELPKQNVKNKEQKNMPDGRVCPDHFRGWLLKWTNYIKGYQRRWFVLSNGLLSYYRNQAEMAHTCRGTINLAGAFIDTEDACSFVISNGGTQVFHLRASTEVERQRWVTALELAKAKAIKMLESDEEEEGASDHAENIKPLSSKLSDLQTCNDLVGKHGSALQRAIGELQEIEDNHTLFNKLKAVNEKATLFRITSNAMISACAEFLELAQAQEKKWQKSLQYERNQRINLEETVEVLGRQHYLLERKCQRQSGTPGMGPPTQGQTNDDDDDEDDFFDAISEHPEKLGFPHTESRESLQSTASSEESSSLSDLSIPAQDALSETPKTEAKVKNDVNICTTVSTIPAIGAFGHFSSSLSIDRTPLKTYRTSIPPRPDISINLWSILKNCIGKELTKIPMPVNFNEPLSMLQRITEELEYSEVLDKAAACTSSLEQMCYVAAFTVSSYSTTSNRTNKPFNPLLGETFECDRSEDYGWRSLAEQVSHHPPASAFHAEHKDWIFWQEFSATSKFRGKYLQIIPQGIAHLKFIKSGNHYTWRKVTTTVHNIIVGKLWIDQSGEMDIANHTTNENCHLKYDAYNYFGRDTPRKVTGVVTDSTKTVRYVISGTWDNKIEAAKVVYLKSPGVKAQGSSSQKGQPQTLPPVVLWKRVLPPPENEKMYAMTSFAITLNEPEDHVAPTDSRFRPDQRLMENCHWEEANQEKLRIEDQQRTRRRKREQEAAEALSDGIFYEGYSPSWFEKIVDELTDMPMHVYKGGYWEAKEKKDWGSCPDIF

>XP_002599549.1_hypothetical_protein_BRAFLDRAFT_77653_[Branchiostoma_floridae]
MAHTCRGTINLAGAYIDVEDSCNFVISNGGTQCYHLKASSEVERQRWVTALELAKAKAIRLMESGASDDDDDGQSHTSPDKNEIQNTLRILSAKLEDLNTCNDLIAKHGAALQRSLSELEMLDKENSTDVQSKVKAVNERATLFRITSNAMINACADYLDLAQTQGRKWQKTLQYEREQRLRLEETVETLARQHNSLEQQVRAQASQGSLKAAPNDKAAADRKPESTAGSDDEDGEFFDAIDETPDSEFRTITIPDSHLTHRRTPSGVSAASMASEASEGAGKDFVYISSSDEEATDKPEEFGVKAKKKLERTASQHSVDSTSSSGGPRTPQTPSKVPKEPRRRRRTRIPEKPNISLNLWSIMKNCIGKELSKIPMPVSHHPPAAAAFVDSKHGWESWQEFTMTSKFRGKYLNIIPQGIAHLKFTATGNHYTWRKVTSIVHNIIVGKLWIDQSGEMDIVNHKTGDKCHLVYTPYSYFSRETPRKSEGKTAGRPRLDHNGLRAKSAESELESELVCSSSGSSETEEI

>XP_011242065.1_oxysterolbinding_protein_2_isoform_X1_[Mus_musculus]
MGKAAALSRGGGCAGRSRGLSSLFTVVPCLSCHTAAPGMNSSAFGSGPASKPQLQPVQAPERELLSKQVCQPISEPASRSEPGSQTTSVPRPSGVGQESELQGLWPGSENGTRSVSIIKASPELAMPSPLQSTVGSLPVTKPESKLVPKTQSFLRQGQAKISVGTPVSGIGVQMVSPPLDSYKGWLLKWTNYLKGYQRRWFVLGNGLLSYYRNQGEMAHTCRATINLASTHFETEDSCGILLCNGARTYHLKASSEVDRQHWITALELAKAKAIRVMKTQSDDSGDDDEEPAAPADNSELHHTLKTLSLKLNDLSTCNDLIAKHGAALQRSLNELDSLKIPSECGEKLKVVNERATLFRITSNAMINACRDFLELAETHSRKWQRALNYEQEQRVHLEETIEQLAKQHNSLERAFCNTPGGPASSSKSFSEGSFLTSKGENSEEDEDTEYFDAMEDSTSFITVVTEAKEDRKPESGPGTTTVDWTSADNVCEVLDGASFMPKNSCKVKRRVRIPDKPNYSLNLWSIMKNCIGRELSRIPMPVNFNEPLSMLQRLTEDLEYHHLLDKAVNCTSSVEQMCLVAAFSVSSYSTTVHRIAKPFNPMLGETFELDRMEDMGLRSLCEQPVWSQVSHHPPSAAHHVFSKHGWSLWQEITIASKFRGKYISIMPLGAIHLEFQASGNHYVWRKSTSTVHNIIVGKLWIDQSGDIEIVNHKTKDRCQLKFVPYSYFSKEAARKVTGVVSDSQGKAHYVLSGSWDDQMECSKIVHSSPSSDGRQKTVYQTLPAKLLWRKYPLPENAENMYYFSELALTLNEQEDGVAPTDSRLRPDQRLMERGRWDEANTEKQRLEEKQRLSRRRRLESCTAGCGGEEAEKESDGYVPLWFEKRLDPLTGEMACMYKGGYWEAKEKKDWHMCPNIF

>NP_110385.1_ORP4_Homo_sapiens
MGKAAAPSRGGGCGGRSRGLSSLFTVVPCLSCHTAAPGMSASTSGSGPEPKPQPQPVPEPERGPLSEQVSEAVSEAVPRSEPVSETTSEPEPGAGQPSELLQGSRPGSESSSGVGAGPFTKAASEPLSRAVGSATFLRPESGSLPALKPLPLLRPGQAKTPLGVPMSGTGTTSSAPLALLPLDSFEGWLLKWTNYLKGYQRRWFVLGNGLLSYYRNQGEMAHTCRGTINLSTAHIDTEDSCGILLTSGARSYHLKASSEVDRQQWITALELAKAKAVRVMNTHSDDSGDDDEATTPADKSELHHTLKNLSLKLDDLSTCNDLIAKHGAALQRSLTELDGLKIPSESGEKLKVVNERATLFRITSNAMINACRDFLELAEIHSRKWQRALQYEQEQRVHLEETIEQLAKQHNSLERAFHSAPGRPANPSKSFIEGSLLTPKGEDSEEDEDTEYFDAMEDSTSFITVITEAKEDSRKAEGSTGTSSVDWSSADNVLDGASLVPKGSSKVKRRVRIPNKPNYSLNLWSIMKNCIGRELSRIPMPVNFNEPLSMLQRLTEDLEYHHLLDKAVHCTSSVEQMCLVAAFSVSSYSTTVHRIAKPFNPMLGETFELDRLDDMGLRSLCEQVSHHPPSAAHYVFSKHGWSLWQEITISSKFRGKYISIMPLGAIHLEFQASGNHYVWRKSTSTVHNIIVGKLWIDQSGDIEIVNHKTNDRCQLKFLPYSYFSKEAARKVTGVVSDSQGKAHYVLSGSWDEQMECSKVMHSSPSSPSSDGKQKTVYQTLSAKLLWKKYPLPENAENMYYFSELALTLNEHEEGVAPTDSRLRPDQRLMEKGRWDEANTEKQRLEEKQRLSRRRRLEACGPGSSCSSEEEKEADAYTPLWFEKRLDPLTGEMACVYKGGYWEAKEKQDWHMCPNIF

>XP_021335175.1_oxysterolbinding_protein_2_isoform_X1_[Danio_rerio]
MEEDMHLVHFLVSADDSGDEGPLAQPDRALIQGALKTLVSKLEDLSTCNELIGKHGAALQRSLSELEDLRAPTDGTDKLKTVNERATLFRITSNAMINACQDFVDLAEGHSRRWQRALQYEREQRHHLEETIEQLAKQHNSLERAWRESPSTLNQAAEGTLEGESSEENEDIEFFDAMEDSPAFITVPADNHSQHRLLSSNQSVTSGSLSSNWSQDDNDGSGSYLRRGRRRRIPDKPNYSLNLWSIMKNCIGKELSKIPMPVNFNEPLSMLQRLTEDLEYSELLDRAARCDSSLEQMCLVAAFSVSSYSTTVHRIGKPFNPLLGETYELDRLEEYGYRSICEQISHHPPAAAHHVISQRGWTLWQEITIDSKFRGKYISIMPLGNIHLKFHTSGNHYVWSKVTSTVHNIIVGKLWIDQSGDIIIVNHRSKDTCHLKFSPYSYFSRDVPRKVTGVVTDGEGSAHYILSGTWDEKMESAKIIESSHACGGSEGKQKTVYQTLPPKLLWKKYPLPENAENMYYFSSLALTLNELEDGIAPTDSRLRPDQRLMEAGLWDEANTEKQRLEERQRLERRKRDAQANLALEEGKEVETYQPIWFMKRTDLETGESSFMYKGGYWEAKDRQDWSQCPAIF

>XP_005155506.2_oxysterolbinding_protein_2_isoform_X3_[Danio_rerio]
MINACQDFVDLAEGHSRRWQRALQYEREQRHHLEETIEQLAKQHNSLERAWRESPSTHNQAAEGTLEGESSEENEDIEFFDAMEDSPAFITVPADNHSQHRLLSSNQSVTSGSLSSNWSQDDNDGSGSYLRRGRRRRIPDKPNYSLNLWSIMKNCIGKELSKIPMPVNFNEPLSMLQRLTEDLEYSELLDRAARCDSSLEQMCLVAAFSVSSYSTTVHRIGKPFNPLLGETYELDRLEEYGYRSICEQISHHPPAAAHHVISQRGWTLWQEITIDSKFRGKYISIMPLGNIHLKFHTSGNHYVWSKVTSTVHNIIVGKLWIDQSGDIIIVNHRSKDTCHLKFSPYSYFSRDVPRKVTGVVTDGEGSAHYILSGTWDDKMESAKIIESSHACGGSEGKQKTVYQTLPPKLLWKKYPLPENAENMYYFSSLALTLNELEDGIAPTDSRLRPDQRLMEAGLWDEANTEKQRLEERQRLERRKRDAQANLALEEGKEVETYQPIWFMKRTDLETGESSFMYKGGYWEAKDRQDWSQCPAIF

>XP_001334384.3_oxysterolbinding_protein_2_isoform_X2_[Danio_rerio]
MTELVVRTLPSPSGVQGPGPDTYKGWLFKWTNYLKGYQRRWFVLSNGLLSYYRTQAEMAHTCRGTITLATVHIEVGETCHFVLTSGGRSYHLKAYSEGECQRWVSALQQAKANATHMMPHSDDSGDEGPLAQPDRALIQGALKTLVSKLEDLSTCNELIGKHGAALQRSLSELEDLRAPTDGTDKLKTVNERATLFRITSNAMINACQDFVDLAEGHSRRWQRALQYEREQRHHLEETIEQLAKQHNSLERAWRESPSTHNQAAEGTLEGESSEENEDIEFFDAMEDSPAFITVPADNHSQHRLLSSNQSVTSGSLSSNWSQDDNDGSGSYLRRGRRRRIPDKPNYSLNLWSIMKNCIGKELSKIPMPVNFNEPLSMLQRLTEDLEYSELLDRAARCDSSLEQMCLVAAFSVSSYSTTVHRIGKPFNPLLGETYELDRLEEYGYRSICEQISHHPPAAAHHVISQRGWTLWQEITIDSKFRGKYISIMPLGNIHLKFHTSGNHYVWSKVTSTVHNIIVGKLWIDQSGDIIIVNHRSKDTCHLKFSPYSYFSRDVPRKVTGVVTDGEGSAHYILSGTWDDKMESAKIIESSHACGGSEGKQKTVYQTLPPKLLWKKYPLPENAENMYYFSSLALTLNELEDGIAPTDSRLRPDQRLMEAGLWDEANTEKQRLEERQRLERRKRDAQANLALEEGKEVETYQPIWFMKRTDLETGESSFMYKGGYWEAKDRQDWSQCPAIF

>XP_009299588.1_oxysterolbinding_protein_2_isoform_X3_[Danio_rerio]
MINACRDFLELAESHSRRWQRVLQHEREQRTHLEETIEQLAKQHNSLERAWREAPAHAVNTPDTPTTDTGVSERPRKEEASDEDEDTEYFDAMEDSPAFITVTATDPSQHRRSQSNLSGASGGQPSDWNQDDNCSVSSNDFSGKELQPRRKRRSRISEKPNYSLNLWSIMKNCIGKELSKIPMPVNFNEPLSMLQRLTEDLEYHELLDKAARCENSLEQMCLVAAFSVSSYSTTVHRTAKPFNPLLGETYELDRLEEFGYRSLCEQVSHHPPAAAHHVVSQRGWSLWQEITIASKFRGKYLSIMPLGAIHLQFHASGNHYVWRKVTSTVHNIIVGKLWIDQSGDIDIVNHRTKETCQLKFSPYSYFSREVPRKVTGVVMDSDGQANYILSGTWDEKMESAKIVQSSRGSSSSEGKQKTVYQTLSPKLLWKKYPLPENAENMYYFSSLALTLNEEEDGVSITDSRLRPDQRLMEAGRWDEANAEKQRLEEKQRAVRRRREAEASRAIDEGEDFEGYKPLWFHQTTDEMTGENIFVYKGGYWEAKDRQDWSMCPEIF

>XP_021331891.1_oxysterolbinding_protein_2_isoform_X1_[Danio_rerio]
MGRVAAPCNNGPGRIVSFLTAVPCLSCKQQQQRRQQHHQSAAVERGRRRMSEQGKSAASTPASGTPAPGSDTYKGWLFKWTNYIKGYQRRWFVLSNGLLSYYRTQAEMAHTCRGTINLATAHIDTEDACNIVLSSGGRTYHLKASTEVERQRWVTALELAKAKAIRMMNDQSDNGHTASLTHCYQSDDSADEEPTSQSDHSEIQGTLKTLASKLDDLSTCNELIAKHGAALQRSLSELETLRVPLEGGEKIKAVNERATLFRITSNAMINACRDFLELAESHSRRWQRVLQHEREQRTHLEETIEQLAKQHNSLERAWREAPAHAVNTPDTPTTDTGVSERPRKEEASDEDEDTEYFDAMEDSPAFITVTATDPSQHRRSQSNLSGASGGQPSDWNQDDNCSVSSNDFSGKELQPRRKRRSRISEKPNYSLNLWSIMKNCIGKELSKIPMPVNFNEPLSMLQRLTEDLEYHELLDKAARCENSLEQMCLVAAFSVSSYSTTVHRTAKPFNPLLGETYELDRLEEFGYRSLCEQVSHHPPAAAHHVVSQRGWSLWQEITIASKFRGKYLSIMPLGAIHLQFHASGNHYVWRKVTSTVHNIIVGKLWIDQSGDIDIVNHRTKETCQLKFSPYSYFSREVPRKVTGVVMDSDGQANYILSGTWDEKMESAKIVQSSRGSSSSEGKQKTVYQTLSPKLLWKKYPLPENAENMYYFSSLALTLNEEEDGVSITDSRLRPDQRLMEAGRWDEANAEKQRLEEKQRAVRRRREAEASRAIDEGEDFEGYKPLWFHQTTDEMTGENIFVYKGGYWEAKDRQDWSMCPEIF

>XP_002931752.2_oxysterolbinding_protein_2_isoform_X1_[Xenopus_tropicalis]
MGVSCHLATPLQCWSMGRAGAPGSGGLVSLLSAVPCLSCPQHCTARPGAAVMSSSSAVTPGTPASPGQDTYKGWLFKWTNYLKGYQRRWFVLSNGLLSYYRTQAEMAHTCRGTINLSTAHIDTEDSCNIVLTNGGRTYHLKASCEVERQRWVTALELAKAKAIRMMNNQSDDSGDEEPSSQSDKSELHSSLKALTSKLDDLSTCNDLIAKHGAALQRSLSELENLKLPAESGEKIKSVNERATLFRITSNAMINACRDFLDLAETHSRKWHRALQYEREQRVRLEETIEQLAKQHNSLERACRGAPGLTSNTTGVLNTPKGNVPAIKGEASDEDEETEYFDAMEDAPAFITVTADPKQHRRSGSNLSSASGGHPDDWHLEDNAFHSSPESNHESKRKELIPKKRRRTRIPDKPNYSLNLWSIMKNCIGKELSKIPMPVNFNEPLSMLQRLTEDLEYHELLDKAVKCESSIEQMCFIAAFSVSSYSTTVHRTAKPFNPLLGETFELDRLDDLGFRSICEQVSHHPPAAAHYVHSKNGWKLWQEITIASKFRGKYLSIMPLGDIHLEFHSSGNHYVWRKVTSTVHNIIVGKLWIDQSGDIEIINYKTKDKCQLKFSPYSYFSRDIARKVTGVVTDANGKAHYVLSGTWDEKMECAKIVQSSHGNSCAEGKQKTVYQTLPPKLLWKKYPLPENAENMYFFSEFALTLNESDESVAPTDSRNRPDQRLMENGKWDEANVEKQRLEEKQRAVRRRREAEAVEALEEGNDYEGYQPLWFERKVDPYTGELICNYKGGYWECKERQDWSCCPDIF

>XP_415293.4_oxysterolbinding_protein_2_isoform_X1_[Gallus_gallus]
MGKAAALCSGSTRGLVSLLSAVPCLACHELPGPGRRAMSAETAGAGGRGGGGAAAGGAPAAPGSDTYKGWLFKWTNYLKGYQRRWFVLSNGLLSYYRTQAEMAHTCRGTINLSTAHIDTEDSCNIVLSNGGRTYHLKASSEVERQRWVTALELAKAKAIRMRNNQSDDSGDEEPASQSDKSELHGTLKTLSSKLEDLSTCNDLIAKHGAALQRSLSELENLKLPAESGEKIKAVNERATLFRITSNAMINACRDFLDLAETHSRKWQRALQYEREQRIRLEETIEQLAKQHNSLERACRGAPGSAGSAGTTKGSVQSAKGEASDEDEETEYFDAMEDAPAFITVTADPKHHRRSGSNLSGASEGHPEDWNLEDSVFESSNQSSYNESCKDLLPKKRRRSRIPDKPNYSLNLWSIMKNCIGKELSKIPMPVNFNEPLSMLQRLTEDLEYHELLDKAVKCESSTEQMCFVAAFSVSSYSTTVHRTAKPFNPLLGETYELDRLEELGFRSLCEQVSHHPPAAAHHVFSKRGWTLWQEITIASKFRGKYLSIMPLGAIHLEFHSSGNHYVWRKVTSTVHNIIVGKLWIDQSGEIEIVNHKSKDKCQLKFTPYSYFSRDVPRKVTGVVSDADGKAHYVMSGTWDEKMECSKIVQSSHGSAGSEGKQKTVYQTLSPKVLWKKYPLPENAENMYFFSSLALTLNEPEERVAPTDSRLRPDQRLMESGRWDEANVEKQRLEEKQRAVRRRREAEAVEALEEGKDYEGYIPLWFERKVDPITGELICAYKGGYWEAKDKQDWSSCPDIF

>XP_021331143.1_oxysterolbinding_protein_1_isoform_X3_[Danio_rerio]
MSEPKAPTPAPGDTYKGWLFKWTNYIKGYQRRWFVLSNGLLSYYRTQAEMGHTCRGTINLATANIAVEDSCNFVISNGGTQTYHLKASSEVERQRWITALELAKAKAFRMQAESDDSGDESTPPAAGQGGGARNSEVQSTLRTLGSKVEDLSTCNDLIAKHGSALQRSLSELEGVRLGGETSEKIRQVTERATLFRITSNAMINACRDFLALAQAHSKRWQKALQAEREQRVRLEETLEQLAKQHNHLERAFRGATVLPPSQSNPAIDSKGSVPGKGDASDEDEENEFFDACEDVQEFITVPADPKYHRRSGSNVSGISSEMGMDDGTTSLDEQSMASNPESPQSQEVVPVRKRRTRIPDKPNYSLNLWSIMKNCIGKELSKIPMPVNFNEPLSMLQRLSEDLEYYELLDRGAKCQSSLEQMCYVAAFTVSSYSTTVHRTGKPFNPLLGETFELDRLQESGYRSLCEQVSHHPPAAAHHAISERGWTLRQEIALASKFRGKYLSIMPLGSIHCIFEKSNNHYTWKKVTTTVHNIIVGKLWIDQSGEIDIVNHRTGDRCHLKFAPYSYFSRDVARKVTGVVTDKDGKAHYVLSGTWDEKMECSRVMQSSRGGENGADGRQKTVYQTLKAKELWRKTPLPEGAENMYYFSTLALTLNEPEEGVAPTDSRKRPDQRLMEQGRWEEANAEKQRLEEKQRTARREREREANRSANPEEGKEPADGAEEVEIATEPSETTDKTDTDETSSDLSLSTETLHGSHPPSYSSKYHTHKHTHGLLRKPSDLKTQHMHKTGLETCVRLFSCKCCDL

>XP_009292831.1_oxysterolbinding_protein_1_isoform_X2_[Danio_rerio]
MSEPKAPTPAPGDTYKGWLFKWTNYIKGYQRRWFVLSNGLLSYYRTQAEMGHTCRGTINLATANIAVEDSCNFVISNGGTQTYHLKASSEVERQRWITALELAKAKAFRMQAESDDSGDESTPPAAGQGGGARNSEVQSTLRTLGSKVEDLSTCNDLIAKHGSALQRSLSELEGVRLGGETSEKIRQVTERATLFRITSNAMINACRDFLALAQAHSKRWQKALQAEREQRVRLEETLEQLAKQHNHLERAFRGATVLPPSQSNPAIDSKGSVPGKGDASDEDEENEFFDACEDVQEFITVPADPKYHRRSGSNVSGISSEMGMDDGTTSLDEQSMASNPESPQSQEVVPVRKRRTRIPDKPNYSLNLWSIMKNCIGKELSKIPMPVNFNEPLSMLQRLSEDLEYYELLDRGAKCQSSLEQMCYVAAFTVSSYSTTVHRTGKPFNPLLGETFELDRLQESGYRSLCEQVSHHPPAAAHHAISERGWTLRQEIALASKFRGKYLSIMPLGSIHCIFEKSNNHYTWKKVTTTVHNIIVGKLWIDQSGEIDIVNHRTGDRCHLKFAPYSYFSRDVARKVTGVVTDKDGKAHYVLSGTWDEKMECSRVMQSSRGGENGADGRQKTVYQTLKAKELWRKTPLPEGAENMYYFSTLALTLNEPEEGVAPTDSRKRPDQRLMEQGRWEEANAEKQRLEEKQRTARREREREANRSANPEEAEEVEIATEPSETTDKTDTDETSSDLSLSTETLHGSHPPSYSMEGPYGAPVKSGHQDSYKAMWFDRCVDPMTGEPTHIYRGGYWETKEQGNWDSCPDIF

>XP_021331144.1_oxysterolbinding_protein_1_isoform_X5_[Danio_rerio]
MSEPKAPTPAPGDTYKGWLFKWTNYIKGYQRRWFVLSNGLLSYYRTQAEMGHTCRGTINLATANIAVEDSCNFVISNGGTQTYHLKASSEVERQRWITALELAKAKAFRMQAESDDSGDESTPPAAGQGGGARNSEVQSTLRTLGSKVEDLSTCNDLIAKHGSALQRSLSELEGVRLGGETSEKIRQVTERATLFRITSNAMINACRDFLALAQAHSKRWQKALQAEREQRVRLEETLEQLAKQHNHLERAFRGATVLPPSQSNPAIDSKGSVPGKGDASDEDEENEFFDACEDVQEFITVPADPKYHRRSGSNVSGISSEMGMDDGTTSLDEQSMASNPESPQSQEVVPVRKRRTRIPDKPNYSLNLWSIMKNCIGKELSKIPMPVNFNEPLSMLQRLSEDLEYYELLDRGAKCQSSLEQMCYVAAFTVSSYSTTVHRTGKPFNPLLGETFELDRLQESGYRSLCEQVSHHPPAAAHHAISERGWTLRQEIALASKFRGKYLSIMPLGSIHCIFEKSNNHYTWKKVTTTVHNIIVGKLWIDQSGEIDIVNHRTGDRCHLKFAPYSYFSRDVARKVTGVVTDKDGKAHYVLSGTWDEKMECSRVMQSSRGGENGADGRQKTVYQTLKAKELWRKTPLPEGAENMYYFSTLALTLNEPEEGVAPTDSRKRPDQRLMEQGRWEEANAEKQRLEEKQRTARREREREANRSANPEEGKEPADGALIEDSISDSPLKSGHQDSYKAMWFDRCVDPMTGEPTHIYRGGYWETKEQGNWDSCPDIF

>XP_021331145.1_oxysterolbinding_protein_1_isoform_X6_[Danio_rerio]
MSEPKAPTPAPGDTYKGWLFKWTNYIKGYQRRWFVLSNGLLSYYRTQAEMGHTCRGTINLATANIAVEDSCNFVISNGGTQTYHLKASSEVERQRWITALELAKAKAFRMQAESDDSGDESTPPAAGQGGGARNSEVQSTLRTLGSKVEDLSTCNDLIAKHGSALQRSLSELEGVRLGGETSEKIRQVTERATLFRITSNAMINACRDFLALAQAHSKRWQKALQAEREQRVRLEETLEQLAKQHNHLERAFRGATVLPPSQSNPAIDSKGSVPGKGDASDEDEENEFFDACEDVQEFITVPADPKYHRRSGSNVSGISSEMGMDDGTTSLDEQSMASNPESPQSQEVVPVRKRRTRIPDKPNYSLNLWSIMKNCIGKELSKIPMPVNFNEPLSMLQRLSEDLEYYELLDRGAKCQSSLEQMCYVAAFTVSSYSTTVHRTGKPFNPLLGETFELDRLQESGYRSLCEQVSHHPPAAAHHAISERGWTLRQEIALASKFRGKYLSIMPLGSIHCIFEKSNNHYTWKKVTTTVHNIIVGKLWIDQSGEIDIVNHRTGDRCHLKFAPYSYFSRDVARKVTGVVTDKDGKAHYVLSGTWDEKMECSRVMQSSRGGENGADGRQKTVYQTLKAKELWRKTPLPEGAENMYYFSTLALTLNEPEEGVAPTDSRKRPDQRLMEQGRWEEANAEKQRLEEKQRTARREREREANRSANPEEALIEDSISDSPLKSGHQDSYKAMWFDRCVDPMTGEPTHIYRGGYWETKEQGNWDSCPDIF

>XP_005160197.1_oxysterolbinding_protein_1_isoform_X7_[Danio_rerio]
MSEPKAPTPAPGDTYKGWLFKWTNYIKGYQRRWFVLSNGLLSYYRTQAEMGHTCRGTINLATANIAVEDSCNFVISNGGTQTYHLKASSEVERQRWITALELAKAKAFRMQAESDDSGDESTPPAAGQGGGARNSEVQSTLRTLGSKVEDLSTCNDLIAKHGSALQRSLSELEGVRLGGETSEKIRQVTERATLFRITSNAMINACRDFLALAQAHSKRWQKALQAEREQRVRLEETLEQLAKQHNHLERAFRGATVLPPSQSNPAIDSKGSVPGKGDASDEDEENEFFDACEDVQEFITVPADPKYHRRSGSNVSGISSEMGMDDGTTSLDEQSMASNPESPQSQEVVPVRKRRTRIPDKPNYSLNLWSIMKNCIGKELSKIPMPVNFNEPLSMLQRLSEDLEYYELLDRGAKCQSSLEQMCYVAAFTVSSYSTTVHRTGKPFNPLLGETFELDRLQESGYRSLCEQVSHHPPAAAHHAISERGWTLRQEIALASKFRGKYLSIMPLGSIHCIFEKSNNHYTWKKVTTTVHNIIVGKLWIDQSGEIDIVNHRTGDRCHLKFAPYSYFSRDVARKVTGVVTDKDGKAHYVLSGTWDEKMECSRVMQSSRGGENGADGRQKTVYQTLKAKELWRKTPLPEGAENMYYFSTLALTLNEPEEGVAPTDSRKRPDQRLMEQGRWEEANAEKQRLEEKQRTARREREREANRSANPEEGKEPADGGGHQDSYKAMWFDRCVDPMTGEPTHIYRGGYWETKEQGNWDSCPDIF

>XP_005160195.1_oxysterolbinding_protein_1_isoform_X4_[Danio_rerio]
MSEPKAPTPAPGDTYKGWLFKWTNYIKGYQRRWFVLSNGLLSYYRTQAEMGHTCRGTINLATANIAVEDSCNFVISNGGTQTYHLKASSEVERQRWITALELAKAKAFRMQAESDDSGDESTPPAAGQGGGARNSEVQSTLRTLGSKVEDLSTCNDLIAKHGSALQRSLSELEGVRLGGETSEKIRQVTERATLFRITSNAMINACRDFLALAQAHSKRWQKALQAEREQRVRLEETLEQLAKQHNHLERAFRGATVLPPSQSNPAIDSKGSVPGKGDASDEDEENEFFDACEDVQEFITVPADPKYHRRSGSNVSGISSEMGMDDGTTSLDEQSMASNPESPQSQEVVPVRKRRTRIPDKPNYSLNLWSIMKNCIGKELSKIPMPVNFNEPLSMLQRLSEDLEYYELLDRGAKCQSSLEQMCYVAAFTVSSYSTTVHRTGKPFNPLLGETFELDRLQESGYRSLCEQVSHHPPAAAHHAISERGWTLRQEIALASKFRGKYLSIMPLGSIHCIFEKSNNHYTWKKVTTTVHNIIVGKLWIDQSGEIDIVNHRTGDRCHLKFAPYSYFSRDVARKVTGVVTDKDGKAHYVLSGTWDEKMECSRVMQSSRGGENGADGRQKTVYQTLKAKELWRKTPLPEGAENMYYFSTLALTLNEPEEGVAPTDSRKRPDQRLMEQGRWEEANAEKQRLEEKQRTARREREREANRSANPEEGKEPADGAEEVEIATEPSETTDKSGHQDSYKAMWFDRCVDPMTGEPTHIYRGGYWETKEQGNWDSCPDIF

>XP_017210757.1_oxysterolbinding_protein_1_isoform_X1_[Danio_rerio]
MSEPKAPTPAPGDTYKGWLFKWTNYIKGYQRRWFVLSNGLLSYYRTQAEMGHTCRGTINLATANIAVEDSCNFVISNGGTQTYHLKASSEVERQRWITALELAKAKAFRMQAESDDSGDESTPPAAGQGGGARNSEVQSTLRTLGSKVEDLSTCNDLIAKHGSALQRSLSELEGVRLGGETSEKIRQVTERATLFRITSNAMINACRDFLALAQAHSKRWQKALQAEREQRVRLEETLEQLAKQHNHLERAFRGATVLPPSQSNPAIDSKGSVPGKGDASDEDEENEFFDACEDVQEFITVPADPKYHRSGSNVSGISSEMGMDDGTTSLDEQSMASNPESPQSQEVVPVRKRRTRIPDKPNYSLNLWSIMKNCIGKELSKIPMPVNFNEPLSMLQRLSEDLEYYELLDRGAKCQSSLEQMCYVAAFTVSSYSTTVHRTGKPFNPLLGETFELDRLQESGYRSLCEQVSHHPPAAAHHAISERGWTLRQEIALASKFRGKYLSIMPLGSIHCIFEKSNNHYTWKKVTTTVHNIIVGKLWIDQSGEIDIVNHRTGDRCHLKFAPYSYFSRDVARKVTGVVTDKDGKAHYVLSGTWDEKMECSRVMQSSRGGENGADGRQKTVYQTLKAKELWRKTPLPEGAENMYYFSTLALTLNEPEEGVAPTDSRKRPDQRLMEQGRWEEANAEKQRLEEKQRTARREREREANRSANPEEGKEPADGAEEVEIATEPSETTDKTDTDETSSDLSLSTETLHGSHPPSYSMEGPYGAPVKSGHQDSYKAMWFDRCVDPMTGEPTHIYRGGYWETKEQGNWDSCPDIF

>XP_021331146.1_oxysterolbinding_protein_1_isoform_X8_[Danio_rerio]
MSEPKAPTPAPGDTYKGWLFKWTNYIKGYQRRWFVLSNGLLSYYRTQAEMGHTCRGTINLATANIAVEDSCNFVISNGGTQTYHLKASSEVERQRWITALELAKAKAFRMQAESDDSGDESTPPAAGQGGGARNSEVQSTLRTLGSKVEDLSTCNDLIAKHGSALQRSLSELEGVRLGGETSEKIRQVTERATLFRITSNAMINACRDFLALAQAHSKRWQKALQAEREQRVRLEETLEQLAKQHNHLERAFRGATVLPPSQSNPAIDSKGSVPGKGDASDEDEENEFFDACEDVQEFITVPADPKYHRRSGSNVSGISSEMGMDDGTTSLDEQSMASNPESPQSQEVVPVRKRRTRIPDKPNYSLNLWSIMKNCIGKELSKIPMPVNFNEPLSMLQRLSEDLEYYELLDRGAKCQSSLEQMCYVAAFTVSSYSTTVHRTGKPFNPLLGETFELDRLQESGYRSLCEQVSHHPPAAAHHAISERGWTLRQEIALASKFRGKYLSIMPLGSIHCIFEKSNNHYTWKKVTTTVHNIIVGKLWIDQSGEIDIVNHRTGDRCHLKFAPYSYFSRDVARKVTGVVTDKDGKAHYVLSGTWDEKMECSRVMQSSRGGENGADGRQKTVYQTLKAKELWRKTPLPEGAENMYYFSTLALTLNEPEEGVAPTDSRKRPDQRLMEQGRWEEANAEKQRLEEKQRTARREREREANRSANPEEGKEPADGAEEVEIATEPSETTDKTDTDETSSDLSLSSK

>XP_021331147.1_oxysterolbinding_protein_1_isoform_X9_[Danio_rerio]
MSEPKAPTPAPGDTYKGWLFKWTNYIKGYQRRWFVLSNGLLSYYRTQAEMGHTCRGTINLATANIAVEDSCNFVISNGGTQTYHLKASSEVERQRWITALELAKAKAFRMQAESDDSGDESTPPAAGQGGGARNSEVQSTLRTLGSKVEDLSTCNDLIAKHGSALQRSLSELEGVRLGGETSEKIRQVTERATLFRITSNAMINACRDFLALAQAHSKRWQKALQAEREQRVRLEETLEQLAKQHNHLERAFRGATVLPPSQSNPAIDSKGSVPGKGDASDEDEENEFFDACEDVQEFITVPADPKYHRSGSNVSGISSEMGMDDGTTSLDEQSMASNPESPQSQEVVPVRKRRTRIPDKPNYSLNLWSIMKNCIGKELSKIPMPVNFNEPLSMLQRLSEDLEYYELLDRGAKCQSSLEQMCYVAAFTVSSYSTTVHRTGKPFNPLLGETFELDRLQESGYRSLCEQVSHHPPAAAHHAISERGWTLRQEIALASKFRGKYLSIMPLGSIHCIFEKSNNHYTWKKVTTTVHNIIVGKLWIDQSGEIDIVNHRTGDRCHLKFAPYSYFSRDVARKVTGVVTDKDGKAHYVLSGTWDEKMECSRVMQSSRGGENGADGRQKTVYQTLKAKELWRKTPLPEGAENMYYFSTLALTLNEPEEGVAPTDSRKRPDQRLMEQGRWEEANAEKQRLEEKQRTARREREREANRSANPEEGGHQDSYKAMWFDRCVDPMTGEPTHIYRGGYWETKEQGNWDSCPDIF

>NP_001139057.1_oxysterolbinding_protein_1_[Danio_rerio]
MSEPKAPTPAPGDTYKGWLFKWTNYIKGYQRRWFVLSNGLLSYYRTQAEMGHTCRGTINLATANIAVEDSCNFVISNGGTQTYHLKASSEVERQRWITALELAKAKAFRMQAESDDSGDESTPPAAGQGGGARNSEVQSTLRTLGSKVEDLSTCNDLIAKHGSALQRSLSELEGVRLGGETSEKIRQVTERATLFRITSNAMINACRDFLALAQAHSKRWQKALQAEREQRVRLEETLEQLAKQHNHLERAFRGATVLPPSQSNPAIDSKGSVPGKGDASDEDEENEFFDACEDVQEFITVPADPKYHRRSGSNVSGISSEMGMDDGTTSLDEQSMASNPESPQSQEVVPVRKRRTRIPDKPNYSLNLWSIMKNCIGKELSKIPMPVNFNEPLSMLQRLSEDLEYYELLDRGAKCQSSLEQMCYVAAFTVSSYSTTVHRTGKPFNPLLGETFELDRLQESGYRSLCEQVSHHPPAAAHHAISERGWTLRQEIALASKFRGKYLSIMPLGSIHCIFEKSNNHYTWKKVTTTVHNIIVGKLWIDQSGEIDIVNHRTGDRCHLKFAPYSYFSRDVARKVTGVVTDKDGKAHYVLSGTWDEKMECSRVMQSSRGGENGADGRQKTVYQTLKAKELWRKTPLPEGAENMYYFSTLALTLNEPEEGVAPTDSRKRPDQRLMEQGRWEEANAEKQRLEEKQRTARREREREANRSANPEEGGHQDSYKAMWFDRCVDPMTGEPTHIYRGGYWETKEQGNWDSCPDIF

>XP_025006949.1_oxysterolbinding_protein_1_isoform_X1_[Gallus_gallus]
MSHRSSASAPRGSPPRFPLARRGDGRAAEPTGARDEAHGFDQPEGRRRAALAPPPIGSAGRDERRSSRPMGGGAWRLTAAAMAEVRGAGAGPGAALPGPMALPAAPGAAPTLPSPAAGGGGGGQGAAPGPAAAAATAGSGGAAREGWLFKWTNYIKGYQRRWFVLSNGLLSYYRSKAEMRHTCRGTINLATANITVEDSCNFIISNGGAQTYHLKASSEVERQRWVTALELAKAKAVKMLEESDDSGDESVSQTDKTELQSTLRTLSSKVEDLSTCNDLIAKHGTALQRSLSELESLRLPADSTEKIKQVNERATLFRITSNAMINACRDFLLLAQTHSKKWQKSLQHERDQRIRLEETLEQLAKQHNHLERAFRGATVLPAGSAGSGGSAKDPCCSAKGDLSDEDDDNEFFDAPEIITVPESMGHKRTGSNISGTSSDISLDEQYKHQVEDTKKEKRTRIPYKPNYSLNLWSIMKNCIGKELSKIPMPVNFNEPLSMLQRLTEDLEYHELLDRAAKCESSLEQLCYVAAFTVSSYSTTVFRTSKPFNPLLGETFELDRLEENGYRSLCEQVSHHPPAAAHHADSKHGWTLRQEIKITSKFRGKYLSIMPLGTIHCVFHASGNHYTWKKVTTTVHNIIVGKLWIDQSGEIEIVNHKTGDKCNLKFVPYSYFSRDVARKVTGEVMDPAGKVHFLLLGTWDEKMDCYKVAAGSGDNGAEGRQRPHEAEESRVPLWKRNQLPKYAENMYYFSELALTLNAPESGTAPTDSRRRPDQRLMENGRWDEANAEKQRLEEKQRLARKRREAEAARATEDGKEGAGDPRAHPDPAALSPAAPAGTPYDPYKPLWFERKKDPVTQELAHVYRGGYWESKEKQDWSGCPDIF

>NP_001239560.1_oxysterolbinding_protein_1_[Monodelphis_domestica]
MAATELRGVVGPGPAMGAAPGGGGSGSAATGGGGRGDSGPGPGIAPGPTAVASGGGPGPGPGPTATAGGGSAAGPAPAPPTGGSGGGTGGSGSGSAREGWLFKWTNYIKGYQRRWFVLSNGLLSYYRSKAEMRHTCRGTINLATANITVEDSCNFIISNGGAQTYHLKASSEVERQRWVTALELAKAKAVKMLAESDESGDEESVSQTDKTELQNTLRTLSSKVEDLSTCNDLIAKHGTALQRSLSELESLKLPAESNEKIKQVNERATLFRITSNAMINACRDFLMLAQTHSKKWQKSLQYERDQRIRLEETLEQLAKQHNHLERAFRGATVLPASAPGSTGSVKDQICSGKGDMSDEDDDNEFFDAPEIITMPESLGHKRTGSNISGASSDISLDEQYKHQLEETKKEKRTRIPYKPNYSLNLWSIMKNCIGKELSKIPMPVNFNEPLSMLQRLTEDLEYHELLDRAAKCENSLEQLCYVAAFTVSSYSTTVFRTSKPFNPLLGETFELDRLEENGYRSLCEQVSHHPPAAAHHAESKNGWTLRQEIKITSKFRGKYLSIMPLGSIHCIFHATGHHYTWKKVTTTVHNIIVGKLWIDQSGEIDIVNHKTGDKCNLKFVPYSYFSRDVARKVTGEVTDPSGKVHFALLGTWDEKMDYFKVLPSNGDNGSDSRQRSHDLEDSRIMLWKRNPLPKNAENMYYFSELALTLNAWESGTAPTDSRLRPDQRLMENGRWDEANAEKQRLEEKQRLSRKKREAEAVKATEDGTPYDPYKALWFERKKDPVTKELTHIYRGGYWESKEKQDWSSCPDIF

>NP_002547.1_OSBP1_Homo_sapiens
MAATELRGVVGPGPAAIAALGGGGAGPPVVGGGGGRGDAGPGSGAASGTVVAAAAGGPGPGAGGVAAAGPAPAPPTGGSGGSGAGGSGSAREGWLFKWTNYIKGYQRRWFVLSNGLLSYYRSKAEMRHTCRGTINLATANITVEDSCNFIISNGGAQTYHLKASSEVERQRWVTALELAKAKAVKMLAESDESGDEESVSQTDKTELQNTLRTLSSKVEDLSTCNDLIAKHGTALQRSLSELESLKLPAESNEKIKQVNERATLFRITSNAMINACRDFLMLAQTHSKKWQKSLQYERDQRIRLEETLEQLAKQHNHLERAFRGATVLPANTPGNVGSGKDQCCSGKGDMSDEDDENEFFDAPEIITMPENLGHKRTGSNISGASSDISLDEQYKHQLEETKKEKRTRIPYKPNYSLNLWSIMKNCIGKELSKIPMPVNFNEPLSMLQRLTEDLEYHELLDRAAKCENSLEQLCYVAAFTVSSYSTTVFRTSKPFNPLLGETFELDRLEENGYRSLCEQVSHHPPAAAHHAESKNGWTLRQEIKITSKFRGKYLSIMPLGTIHCIFHATGHHYTWKKVTTTVHNIIVGKLWIDQSGEIDIVNHKTGDKCNLKFVPYSYFSRDVARKVTGEVTDPSGKVHFALLGTWDEKMECFKVQPVIGENGGDARQRGHEAEESRVMLWKRNPLPKNAENMYYFSELALTLNAWESGTAPTDSRLRPDQRLMENGRWDEANAEKQRLEEKQRLSRKKREAEAMKATEDGTPYDPYKALWFERKKDPVTKELTHIYRGEYWECKEKQDWSSCPDIF

>KXN68362.1_hypothetical_protein_CONCODRAFT_79766_[Conidiobolus_coronatus_NRRL_28638]
MSELVNNSDHLSLGGHSPTASVLTVSNTTEPENPEAALIHFKMLEALRTENIENIQELWNTWPKNNSGGYTTPLHLSVLSSDLQVNKAVLSLPDLDINQQDSLGNTALHQASKAGRLAIVKLLLEQPNINDFLDNKAGRNVVDVAKSSDIVQLIHDDRKQFIVDRTVFLEAHLSQPTQQNLSQIVQFFTTHPRHSLLDVNHRHPLTGYTALHLATLLDDSDQVSKLLSVGANAFSRDKKSKTPIDLSKSDKVKTMLKNSNANLTINEPGQPPRMEGVLKKWTNIAGGNKNRWFVLENGVLSYYKSREDTANACRGSINVINAHLKIDPNDPCKFDVIGRDSTRFHLRANTLSEAKQWIMGITNAKSQQNSTLRKDHIGTVNLDKNPLSNDSQNYMNSPNLDRLFNLSNNGKTSPPNTDRERASSVHSEESDIPNRDTIDMNEHSTTVQFDILEKLLLSLKSTLEKDPLDSNEVERLLTAITQSRQTLSTSHQKIVEMYQQRESYWQKKFQKEADHNELWSESLRTLAMENQSILDALEKSKTNSKLDKSIKSNENGDTTLNSIAEVPEEPVGPSFDDDDNDIFYDAEDDSEFFNAEDEQEIIQEEPEQTVDEAEQVEKIEKPASKALNTVSAIKTSLAKSYQGYPAEGKFRVQLKYFKDGAKPPSISLWAILKNSIGKDLTKITLPVFFNEPSSMLQRMAEDMEYSRLLDIASRQVSSPERTMWVLAFAMSNYSSTAGRIAKPFNPLLGETFEYCRPDLGYRYVSEQVSHHPPISACYCESPNYVLATEVNVKSAFWGKSFELMPQGVCHVFLKVHADRKDGAEIPIEHISWKKVTTAVTNLIVGNPTIEHYGEMIVTNHNTGDVCRLNFKSNGWLSSDRNVLDGEVVSAQTGKAEWILSGHWDKSLIAKRAGVKEASQNLDAHSDATSHKLSEFLKDPTSSDSVILWKRSPFPEKPLPFKLTPFAITLNDMTDGLEPLLAPTDCRLRPDQRAMEEIRFDDASEEKNRLEEKQRAVRKAKEAELQRALERAPTSEHSAIKARFAHKPRWFKRTLEPTTKEDWWEFNGEYWLERERVAQEKANGNNEATWKDCADIF

>XP_025172968.1_Oxysterolbinding_protein_[Rhizophagus_irregularis_DAOM_181602=DAOM_197198]
MTTTPQVEQVEQQRRVSTPSLRLSIKSNSNAAVEDSLKTYKLLEALRSGDTSTLQTLISTYTLPVPSSTSSSTPTSSTSSQHNLPSPLTLGVQCATTNTIEFIISNFVGKNIDLNQSDQLGNTALHYASKGGRIDVIELLLKQKNINDTIMNVDGKQPIDLAKNREIANILKESRDEFVEHATSLFKQYITNSNYSGLYSLFSDPRAVALVDINHQDSTTGATLLHDSARKKDIEMVKFCIDHGADVGIRDRKGKLAIEVTKDDDIKSLLKQITPLLTTTSIVTTLESNQPPKLKGYLNKWTNYAGGYKSRWFVLENCILSYFKNQDDAGNSCRGSINMKIAKISIDSSDRQRFDIIGKGSIRYHLRANHPSEAKKWTIALTQSTQWQQQNHREDGGMVSPTSRNVTGEIKDDDSRVGRTESLSQQNNDQRSRSRSPSDDSIEVETIPYEDSYQMTINSAKAQFLLQNQQLEALITMLPLQSSSLEEGNETKEGALVETFSKSLNLLQNYVEEILRMTEEREEYWRKKLDKELEIKRLWEQSMRDLFIERNEMEQIIQDNVKEEKLRKKQLRLISPTNSTPIQRESSEMEVRKSEEFQSRAVDLTVVTNGLSTTSGENLITTSSMSLADEYDSDEEFYDAFDGCSVNEDINKSATKLPSELSSEGISLPNSTSLQPYISNSYLGYPEHIRERLPLDQKSLRPEVSLWSILKNSIGKDLSKITLPVYFNEPTSMLQRMAEDMEYSELLDSASRQQNSAERILYVAAFAMSNYSSTVGRIAKPFNPLLGETYEYVRPDKAFRYISEQVSHHPPISACYCESPNYDFFAEVDVKSKFWGKSFEILPQGVSHVNLKVLNDYWPKSLPDTLKKPANENGEVFIEHYSWKKVTTCVNNLIVGTPWIDHYGDMIITNHLTGDKCVLTFKARGWRGKDAFEIRGFVKDGENDQEVWEIAGRWNERLIARRCDINLSGASEVDLGSDKAAEHAYQHHTAGNSNSLDGIPMTPISPSSLQYRRPIVLLWKKSPTPEEPMPFNLTPFAITLNDLPGNLVPWIAPTDSRLRPDQRAMELGNYDLASTEKVRLEEKQREKRKKREQGVDKEFVPRWFTKKIEKDTGELYWEFNHEYWKERERAGKEKVEGNGQGKWNIDDDIF

>XP_006675070.1_uncharacterized_protein_BATDEDRAFT_9025_[Batrachochytrium_dendrobatidis_JAM81]
MDDSPAVQLTCNPLTSPTSESQGKHIFLDNESLQVSFKGYHGVEKARKHLPLDPSIPKPALAVWSFLKSAIGKDLSKVTLPVFFNEPLSMLQRMCEDIEYIDLLSLASRTGNASLMRIMLIAAYAMSSYGSTVGRVNKPFNPMLGETFELVRKDKQYRYFSEQVCHHPPISACFCESPDYVFWTESNVKSKFWGKSLELHPLGNCHVSLPKYQHYSWKKVTTCVNNLIVGKLSIDHYGDMVITNWETGETATLTFKVRSTNGCGGGEIVGKVTDSRGQIRFEIKGRWDDTLTAIPVLNANGMSFSSAKLFQRPITLWKRYPMPLASLQNFNYTTFAMSLNETNAELETILPLTDCRLRPDQRAMECGLWDAANTDKEKLEMLQRSNRKRAETKFHETGIPSGPVHTGSSISTNEPWWTPRWFVREIEPDTKEEHWRFTNEYWTIRQAISEGKLTQWPDYVMDVFGIGPKTIE

>XP_016607546.1_hypothetical_protein_SPPG_04899_[Spizellomyces_punctatus_DAOM_BR117]
MSTPASSSAASPPGKAVDESVKHLHLIDAMRTNDIPTITAAVRRLADSTVTPSYGSPLHLAISLCSTPVVEHLVATFGDALKIWVNARSLPDGETPLHVAAKLGRADIVEVIFKIKGLDDTIRDADGRTAEEVAKSERIAGLVVAHKTQYAEKILSTVRQHLHNNATQAAIDVFKNDARANAYLSMGWIDINAPIDPETEHSFLHFAAKADDVQLLNWALERGADPGVKDRKGKKPVDLCPKKDSNTKEKLKTAIAQAPIMSGSLPQATSSTSGAHNPQAPTLRGTLFKWTNYAVGYKNRYFVLEHGNLSYYKSSTDYPLACRGSISTMIANVVLPDSSDKSRFDVVGKGSVRYSLKARSPADAKKWVWALMESKKYMIDRAKDASGDTSHTSVEEKEGSEEWEQESSAGEDEAPSVRLSVATDLAASGNNLNVPAEEGPLGSARSSVSGDGDRHYPASVHTTRTAQDALPTTSTQDIGTLMYLLNVQLDVQQRVVEALVDALTVHSSNLSTSTDPSAGGPVSSNTSFLQEVDVSNLPSLLQSSSKHVQDTVRKLVERCEQRQRHWARRWKKEKESRRRWEEVVQKVLGIEGLPSGQNITLRVGHPVGGSDTVSIATSGHGDVDLEEDEFLETEDGDVFYDAIETDTSAAKTDTGYIENMFGFDAIDESVGKPVLARRPTRTATSMSLVLPSGHVISRKALEKSLYGYPPTGNYRTSLPLDPSTPKPSLAVWSFLKSAIGKDLSKVTLPVFFNEPLSMLQRMCEDIEYIELLSLASCVGRGFVPAEEGGAARTAAQTLGVSFDDLCGLDEEDASLVRIMYVGAYAMSNYSSTVGRVNKPFNPLLGETYELVREDKGFRYLSEQVCHHPPISACHCESPDYTFWTEVNVKSKFWGKSLEIHPLGMCHARLPVYTKATNPEEKASVSGMEHYSWKKVTTNVNNLIVGKLWIDHYGDMAIHNYRTGEDCIITFKPKNAGGGWFGLGGGSKKKDDANGDADNGGGEIVGIVKDANGVVKWELKGRWDDKVVAHFVGSPAGKPKILTQPLPLWRRNPTPANASQNFNFTAFACSLNEANPTLTSVLPPTDSRIRPDQQAMEKGQWDLANTCKEKLEELQRNRRKNIIAEFEKTGVPSGPSSDVGIPIGEAWWVPRWFVREVEEDGGEEHWRFNGEYWKWRDRVQNGEAWPEWVLDVFGTRGGESV

>EPZ32875.1_Oxysterolbinding_C2F12.05clike_protein_[Rozella_allomycis_CSF55]
MSADGTLTIAIVDAIRENHLETLLELLYKLYPDSAKTLPELCRRYQSEKYGTIAHLACTVGSKSFVQEIMKYGIDLNSVDMHGNTPLHKASQAGRHDVVDVLMKSDAIHDFVKNNEGKTAFDVAKTRETLTTMERKWFWVYVTDNRKTFIAMKTREIFQAANAFDLSRVKELFNDERVSVLIRKDVSEPGSGDTLLHVFCASKSDQTEAVKWLIEQGANPHVANKKRKFPIDVAKHENIKQILKEAPKMSNSFEFPEGKQTRMEGYLNKWTNYAGGYKRRYFVLEDGTFSYYKSQEDYPVACRGSIHLSVAKIVIDRSDKLHFDVFGNNSNRLHLRADSAGDAKKWIVALTEIQKYLTSMDPQTISRKASMTYSFNEDEDVDIPVDAGESTLFNAASLQIQILEECLNNFVNFTNRSKDENFDEKLKEFEDQSKKAINSIKKTIQLMDQRESKLKKRITMDIEKDKILQESLQALALENSQFEKLRKEKSESSLKIENENLEDEDLFFDADEEISVEVKEDFIKDSIVGYPDQFRNSFPETEKKSSSVSLWSILKNAIGKDLTRMAIPVNFNEPLSMLQRLCEDVEYVNLLTNANFKENSLDRLSLVAAFAMSSYSSTEGRTGKPFNPLLGETFEFVSKEKGYRYLSEQVSHHPPISACYCDSDNFVFWSEVNVYTRFTGKSFEAHPLGVSHVTLKKTGEHFSWKKVITAVNGILMGKLTIDHYGTMTIINHSTGENCILEFCKPGWRSKDSKIVQGKCYDANGNDLQWNIHGKWNDRLILTRNENQATTLWKRNPTPEFGNSFNFTSFALQLNELTDSLKDYLCPTDSRLREDQRALERGDYDAASKLKNDLEEKQRLARKERTTEYQPRWQTSNNPVTIILNHSPILIPFAISHCIKQDNVSKLQYLIMQLIPTDIQSFDIKWAIENSAINVLTFFVEYKMTTIHDISSIALENSLFHIFPVLIQNIQFKDQILQDIVKREAFPVSVFKLFKNSKNEDFFQRLYEASVNSGKINLACYILNANFYQPDYNSLAIALKANCTVLIEFLIKYMVHKRNVFANLCSLPDLSANKLLNAVNIMEEYGYQFSEKERMLIDDILEKYDVQ

>XP_764967.1_oxysterolbinding_protein_[Theileria_parva_strain_Muguga]
MLEPDCLSYSIEKDGVVKESFLLSHCKIRLCPGFTYSHLSHTLLHTLHNDPVRLDIEVVGSCLLCLRTDTPLEKHKWYVSFKRAQKLALQSNQRRQPGERFLTSHPEETRAPESEPQDSSKYSEKYTEKYTEVYTEVNTEVNTERKYLSESGRVKEFEPVVTDKPEISNIFVKTRSGREAKPSLSYILDNTETFEHISSKILNELETTTDSESLKHLKTFRLILSDFCCSIKRLSEEEFSTAETKQPYYTSKSDKAYSKPEYTKTDLTKSKSKAEKFKSEKFKSEEYYLSKNLGLDGTKPLSVPVPNVHNLFSEPKTPEQNHFHQLEQLNQLDQIDRLEQLNRLDQQDEDGRYVSEEKLVPKEAQDLPEALEESDTSEELIDPNKGANMLDYHEFTLGTGCDDPTALLLAGKAESSDNFSFESKVSEFPVRRTSGESDSDSETKTKLESKLDTKFYETASTESSLSKLSLNTFSNTDRSKIKRRTVLPKPRLDHKVSIWSILKDFIGKDLSRIRMPIVFNEPTSNLQRAAEDFTYYKILNDAADMEDPIERLANVTVYSITPYSSAVGRSYKPFNPLLGETYEISHTGFNYFAEQVAHHPPILAFHCFNDKFESSGSLNMVINFTGKAIEANLMGPFVVDLKLGSGVEKYNLQRCNMILHNLIFGKMWIEAVGYVIIKNVTEGHFSVMQYLKKGWFNKEIHKVRGLVLDKYGTHHYYISGIWSKHIFIEKVYSSASKSKNKLLNDDGSLIFNKYRYKNEADAWDAFVNDIDWENINVVPNTRREVWKPFDRPDNNEDYYGFGYLTMQLNELTEDYDKSKGAQMPRTDSRYRPDQRLYEEGNLEEATELKKKLEDKQRAVAKDRMDNHITYKPYWFTKVIDPATHQANWVYNGTYWDRKRDGSVDQGTPDIFGL

>Contig12905.0.g36|Oxysterolbinding_protein
MQSQASTSPHTQSQNPLPQGRPSNLFGSVMSQSGNITLLTLDSSKFLNSGIVWKRGMFKRYNNKYHMIVEDTFLRYGKIAKQKIHTIDLKEGVTVIADSKNNKGFKVKSSRKYLHLRCDNQLDRDNWVRILNEITERYKDNNQNNSSPKENNMFVQTPQTSQKLPSARKSEGPRTYTLMEISEILKDRNSDLNRAMETNEKVFIEFEKEIKILQNEQDVRRQKERIDHIIQASKQIKKAQGHLFEIISKTNKRLYEIAEQIAVKQIQQDPMEFIRKESVMLQPGELKFGRDKSMKNDEFHSFEDESQLQTSSKINAKMEGKTKVFEMNQNQLQLQEELKQRNSDPNDEVVVTEGLDDVFHDANDFFPSESVLVTGGAQRMTYRQSTKIQGGQNGNLNLEESKEFEEDDPPERNVLPYFKDPKTKISIWTILKDSLGKDISKLSVPVYFNDPQNILQKCATSQEYTDILETALQQKEFIRRLAYVGVYSTTLLANIERNSTKPFNPLLGETFEFVNDKIQFVAEQVSHHPPVTAFHCEGKAGYKIWSNNKAKSKFTGKSLNFIQQCRIYVELTAYKEIYEIQQPVISAHNLILGTPYEYVELEYHKRGWSASSAFKIDGDVYSSKKEIPYRIEGKWSEKLYLINNKTGQKDCVWTKNPYPENWEYMYGLTQFGLQMNYFPNFMHKVVPPTDTRRRPDQRALENGDMKNASSEKNRLEEKQRAVRRYQEKNNILHKPVYFEEKFNPEDNQMYFVYNYTYFEKDRKDKTWNRLPDLYSEQLPPEVEQFEKSRATK

>XP_958853.1_oxysterol_binding_protein_[Neurospora_crassa_OR74A]
MAGIEQLEIHSKSYIVRWVKVDEGHTISWSLQPHKKSINFAIVKHPGSGGTAAGSQTFEATATPEHPATEAAVSDAKSGLFRRDASTAQDQLAKKGFIPIQWHGKCEADKVTVGTYDVTSAGMYGLVFDNTFSKQTSKTATFVLLTYPTGAPPQTAHHLPTVQAGAGSNASRTSLGAGTTPRLGAANSDSVDSLPSNETAGRGRAASNARSEGGFVPGATYHVGVLLKRRRKKGQGFARRFFSLDFTTCTLSYYHNRNSSALRGAIPLSLAAIAADERRREITIDSGAEIWHLKASGPKDFNDWAKALEKASRIARGLETLPNGASLGVDRPASRPSTSVPSAQQEDEREWAQVESLVSRVAGTRDALRRLVKDMAAEKQAPGASQASLLSPNTPAIAEDSETYFTPSTESRRPFWKRKTSNASPGAQPGVQATAGAALAVPSPASATAVAEERNPYDNCAALLNDLDSVVVEFSQLLSKNKRRRIPSQMMPPNMMPAASRKSYESTASTIDEFFDAEAGEQGGAGQNQVMIIRQSEEDMAGSDAEEVDIHDSSSVSSVEEEEEFEGVGTENHDSLFPVKPKSLAPLPITDTVTRRTTIPAAKVPPPSLIAFVRKNVGKDLSTISMPVSANEPLSLCQRMAEQLEYGQLLTEAAKKTDANERLLYVTAFAVSQFSNGRAKERATRKPFNPLLGETFELVRSENEVPGGFRVLVEKICHRPVRLAVQADSALWSFSQSPAPSQKFWGKSAEITTEGRVRVSLHLPDGTDELYSWHIATVFLRNVVYGEKYVEPVGNMNVNNETSGAKAVVEFRSAKGMFGGRGEEVHVETFGPDGSNTGQALTGNWTSSLKTAPGGKEIWKAGSLVPNAANTYGFTTFAASLNEITPLEKDKLPPTDSRLRPDQRFHEQGDLDSAEEWKVKLEEAQRVRRKQMEERGEEYKPKWFVKVATGQDGEEVWKLKGGKEGYWEERAKSGGQWTGVLDIFSG

>Contig16120.0.g102|Oxysterolbinding_protein
MQSYQGAYNNQASNNQGSNHLQINHSSSQISQNNRSDSLSSPQKSTTKIFPQPGGKHPVLTGQLLKRGNIFKRYQKKYIFTFQDNKLRVEKVGKDHTYEIDVRDSVVTRDKKSKRVFKIKCAQTKLTLKAADEMERELWFQNLTRIAKTYDGEDVSKRLAEGFDETSIKKIVKNVKTVKTVTLNQISDILQKQDTKLQSTLGESSRTYLTFVRDLKQLEQELTNKNHKDRMQRILDAAKAYQDQYHKAFEFMNSTNKNLHRILEEIAEKEIERNPIEFIKKEAFLHRGNEEFFSFDDDNLIIDDIYEVDDDGDNEYHEEENAVGARYTQYLNKAAFGLQEQESIDNGQQQQQPRVYEENKKNSTAQILEQDNQLVQELEDVFHDAKDYITDSALRINTRQSAMKFGNSQDNSLLLINGQYNSNQEESKYGLQPGEIPDPEERDLLPYFKDPKLKISIWTIIKDSIGKDVTKMSVPVYFNDPTNILQKCAASMEYNHILDMAIDQQDPIRRLAFIAVYSTTLLTCLEKNTTKPFNPMLGETYELVTHNFKFIAEQVSHHPPITAFECQGNKGYKLFGNNRAKTKFNGKSLNLIPYYKIYVELPQYNEKYEIQQPTVSAHNLIIGNLYLDLGGKSVIRNCSNGDYCQLEYHKRGWSSSNSFKVDGEVYSKKKELLYKVEGKWNQTVGIINAKNGVKEAVFIKNPYPEKEAFMYGFSHFMLQVNYLPNFLRNQLPPTDTRWRPDQRALENGDMKTAAYEKNRLEEKQRVVRRYREKFNIEHKPVYFEEWKNTEDDMMYFRYNGTYFEQDRITKDWRRLPDLYGEDVPPEVKQFEKKSK

>Contig21970.0.g81|Oxysterolbinding_protein
MSENIKSKSNFVAPLTKIYREKIKKNKEVKPQQSSTSQHNNSDPSKKEQNLSGGNKQLPNLIEEEKISPRDPNLQAYNSNPQGWGAVGSNQGGQPQTNKLSQISNFDPSSVQGIKQGFIKKYVNMVRGSKKRYFVLTPELLIYYKDKKGQVSEKGQISLKLAKIDPRTMNDKKMVIGTGMSEIFLEFATVQEKKEWLMAIDDCKKRLNFNLNTQGDSLQIEDGADNFDSINKKSFLIGPQELQEVNSKQIRKSSIMYNQHNERKSQLKESQGLDFEIKMAINAALQSNIIKEDSQLSIHLASTWQAQLALEEVMNKFKTEFSQYEEKFPSNLIKLGQNIESISNDLKQSVTSAIQAVEKTKLKIIKILEVQDEMLKKKASVIDEKGYLGEDSKFISFSQEFNDLVEHKRDINDDLFEQADSLQNVKSHQEIVMEQIRQSRFSRPSLMHKIDAIDEDDDFFDAVGDQQTLEIAQQEIVKPEEVELKSYKEEEQDYRTILPALKPPDQKVSVWKVIKDAIGKDITRFCVPVYFNEPISMLQKVSEIMEYESLLVKAADEKDSLRRLLYVAAFGVAQYKCSDKRLCKPFNPILGETFELKRPNYLFFSEQVSHHPPVSACFSQSDSYEFWMNTSMKTNFWGKSLEIKPFGYQNVKLKTTNERFTIERPSSSVNNLIFGEMYVEHSGVMTVKNLDTHEYVEIDFKKRGWGGKSAYEIEGFAFTPSKQKKWKLYGKWIESISVKSLTNNEEYTIWQANPMPKNFESMYNFTYFTLQLNYLPPGLKERLPLSDSRFRPDQRALEEGDLIKAASEKARLEDKQRKMRKEREQTGDEYKSLYFEEYVDPQTEEKGYKYIRDYWEDRKNGNWSHIQDLF

>XP_005715457.1_unnamed_protein_product_[Chondrus_crispus]
MPPRKPYCPKPHPPLPAIRKPGTMTPALPASLLRAPGVDVPPTAATPLRPNLWAVLRDSVGMDLTRIALPVFFNEPLSFLQRLAEDLEYYHLLARAAAAGPGPTRTALVAAFFVSHYSSTAHRASKPFNPLLGETFDLVVPGAFRLVAEQVAHHPPISAIHASGDGWTYHTAHEIKNRFKGNSLEVWPEGNVYVTFDDGDHYVYEQAHTYVHNIIVGGLWLDNVGTVVIREVSKGKLLASVKLKRSALLFGEAKKVGDFSGKVCDVGKGGKAGKVLMKMDGNWNSEVRVDGKSVWTATQRPTKKDTAGHAMTAWAWGLNTKLEPGVVGSEVPKTDSRLRPDQRALEEGRYREAAAEKERLEDAQRRKRKEGVCERPRWFELVDEASTGRKEWKYRGGYFECKRERSWPDDLPDIF

>ORZ39436.1_Oxysterolbinding_proteindomaincontaining_protein_[Catenaria_anguillulae_PL171]
MTSPSAPSSAGTGLGVGPPPTHTTAPSAVSANSTVSDAIASYRLMEAMRTADFDALTSLAAPHAIPRLQPDLLAKFGSILLLAIAIAPTRVADWLITRSPTPADLVNTPHPVTKETPLHVAARTGRDDLISVLLNVPGINDGARDAAFRRPVDLARSDPIRQRLAEHQSQFIVRTTAAMHELAGRNDFLGLVDLFKDPRTSALIDINHRDPSSGNTVLHTAARLGNDQMVKWCLADRRADPFVRDRKGKYFYEITKNDDIKALFKKFSSGASPMTVAAPDQMPQLAGILHKWTNLASGYKGRWFTLERGVLSYYKHQDDVPNSCRGSIHLKIASLWVDASDRHRFDVIGKGSVRYHLRAEHVAEASRWIHAIAQSKAQLNDMEKTSGRGGSKGAVGSSVGKSASAPPSEHMGSPRMDSSALLPPPPPLGDGASDVSGFDTQGLASYAPGTPMVDSHPVLPGAPYARRASADSTNGGNQAQHDDDHVSADIGPPHKEQLAMAINALRVQLEMQANLVGSIPDAQLAQALTMVTTTVRHLVDDMVNMADEREEYWRRRCDDEQVRKTAFEEALSNLASEYQAVETEARSMAHTLRKTQRQMQMQQQAFSASSAAVVEAPIAQPAATVPAGVDAAAPVSPTTIKPADAAAPEVFATPATATAPTPPMLLPPGNQIAAWPASSLGGDGDDDLSSTASDVEETDDDDDEFFDAVDDETAEEVKAADKALIAPSLAGYESADYSFVASLRSSLPVDHALLRNEVSLWSVLKNAIGKDLTRITLPVYFNEPISMLQRLCEEIEYSVLLDLAWKRERSDERLLLVTAFAISSYASTVDRVGKPFNPLLGETYEYVRKDRGIRYVSEQVSHHPPVSACFCESEHFKFYGEVFVKNKFYGKSLEVHPLGVCHVDIKRGHVGEKDEHYTWRKVTTTVHNLIIGKLWIDHTGDLEVTNHATGERCVVTFKPTGWRNKDRAQVEGKLFDATGRAIWSIQGSWDDKLVAKPLVDDRRAFSLCVPARDGDAASPPPGDESVKSGGGGKNTVTLWRRYSCTLSPSNFNLTPFAMTLNQLPPGLEKVLCPTDARLRPDQRAMEEGRYDDASFEKNRLEEKQRAVRRGKEAEGDHGPHQPRWFVMDQDPDSGERYWRFTHEYWDARAKGNWDRVPDIY

>XP_004343249.2_oxysterolbinding_protein_1_[Capsaspora_owczarzaki_ATCC_30864]
MSSSRHSAHLSDSHETHHSHPHSSNSNNGLSTTTTTTTTHQHPHQPPLLTSSSASSAHPSQGALLPSANLLTTAAAAANAHLTSHGASSTSTSTSTSNISNAPAASAMSEHRTVARQASAPLAPNSTSFAELHHGQHHAGHASHPSTPQQSAQQQRHRSGSTSLSEHLAPSYASSSSSPATTTAAAASPSSLSTLTLTGGGGGGGGGAAGSSSSSSASSSTTVAAAAAAVVPSTPGGTPIPKPAFAGSLRCKTSNTFSAWRPRYFVLDGNELRCLAGKGDLSCSYILYLPGAELAGNPQKLQIDIRLPSKLHASRYSLRASTTSEYEAWQSALRTAKSWVPQGGPAAAGTRKSIEVFNTQSMDEAASSIGVEVGDNGGEADQTAVVVAPHSHKRRPATFEELESKQMGLSASREDFLSRLKNMVEALDVSEVPGTNLPVPDGRALTRDGTVREKKSRGDRDAAVAAAAASSAVFALRSSVHRLQSSAMEMLSLYADYNLLVETNALYWKGAYDKEQVKLNGLEKSLANLARQHAALERQTSRVCSSGLPLDDIPSDEEEDEFEELDGNNDDAELPQGVVDSDSDSGSDDEFFDAVESATSRSSAAMGTAPGTPTTQGSSSIPTKASRGNTISLFPSGSHLASGTPTAGSPTVAAAAAAAAPITAASAHNTALVRPAAAHVPSMNTANGSADFATTAPHHSHKADGNQLAIRAHTGGTGLRPWRHSLPAFKSEKKLNIWKLIKDAIGKDFSKISMPVILNEPLSALQRFAEDIEYSYLLDMAASKPTSLERLLYVAAFSISSYASTLNRTGKPFNPLLGETYEFYDANSQVMLHAEQVSHHPPVSAFHASGTGWTWWKEVAYSSKFTGKDMEVTPVGFSHAAFPAHPADHYTWRKMTTSVHNLIVGKLWIENFGEDTMVNHGTGDKCTIKLEKYRYFGKSEIGRVTARVLDASGREHFRIQGNYDESIQFVKVDADGANLTWEQLTARSAPTTLYTRYPHPDYYDQFYNFTNFAITLNDVDEHLASRVCPTDSRLRPDQRLLENGDMDGAQAEKTRLEEKQRSVRRQREAKSTHHVARWFESKFDPHVKLDTWTYLGGYTEARDAGRWENVPDLY

>CEM12655.1_unnamed_protein_product_[Vitrella_brassicaformis_CCMP3155]
MGPVSDVADEVNSHGRRDDSFFTCCDIVSMSKSISGGADRYMPISSNIAEGESFTAADEWQHPRTGASAHRPSPHGDALLPMSGTIDAEGIHLTRSAHQSPSNRLNFISMPVPNTAPPSAPSSMRCLPSIRKCLPSVRRRHRNRERLFQRQLTDGDDGFLGVEDDNDEYCISEGGGSGSPYALMDADADTSLPVGFPPKSLSDSPSGAEEHTPTARTAVKRAGWSRAWKDRLTLSRKAKGTASTTDRSPKRHPRHLHPPPSPPAVPFPPPSSTHEHVNQAAAAAASGICNHAADDQDAAKGGGSGGASPSDKRAENDDAAKRGGGGGGKKDSDPNNNRDNDLPGGGGGGPEEGGEGGGGGGGDDNNGEEESSASEDDEFVDCEEEEDENEEEDDDPDPDVQQAAFGAALNGKGAVDGATGEDWHGYLPAHLRERDRIPRRRALAAQKGEFKLSLWSLLKDTVGKDLSRISMPVTLNEPLSFLQRLAEDVQYHSLLTAAAKQTCPLKRLAHVAVFACTPYATSVKRLQKPFNPILGETYEVSHLGYRMIAEQVSHHPPVSAYHVIDDNHNFTLWGSCHGKIKFTGTTVEVKVAGWVRLRLRTCDGWEEYVWGRPITVVHNIIFGGLWMEWVGMVSVRNCTRRQTAMLEFMRRTGGMFTKASPLHQLRGEVRDETGTPHYVVGGCWSQHIWVQTVNARQPSSPDSGGSNRPYDVSYDPPTTGLQRLDGVHHHHDHEAHAGPSTALLHCGKSDDSFANLDDSPPVSPSGLRSKHKLTVCLEQNSPSPDPRDTLVEWRPAADPPNSCAYFNFTSVAMELNEVSPDYDPKEGVPVPITDSRFRTDQRLYEEGRVNEAQAEKRRLEEKQRAARKARIDEWQPRWFERRLDPIVSKKEPTWQLRQTPSYWDKKRDYADLLMRSQAPNTNRHATMGHGQGGVFPEAPDLF

>XP_001698140.1_predicted_protein_[Chlamydomonas_reinhardtii]
MATTGGGPSGAGALIRAGSTAYAMGGRARVYEGRDRLPAPKPLGRGFSIWSILKNMIGRDLTKITMPATINEPTSMTQRMAEVLENRSLLEKAAVETNSLDRLMLVACWLLAGYNSQPQRDNKPFNPLLGETYEWVAPDGTARYLCEQVSHHPPVSCFVGEGAGEQGYSFYGEVETKTKFWGKAIECILAGHMAVKLKAWGEEYRFNLGTITINDVILGRFWIDLSCDMKIRNEQTGETARLFIKPCRGVLKERGKCEGVVYDALGKEVWKISGSTMVALNATLTPAAAEERGASTDPQLVWTRTPEVPNPTEQYCMTRFALGMNDPADPIMPFLPPTDCRFRPDIRALELGEWNRATSEKLRLEEKQRSARKERKEAGIEYHPRWFKQVMFGTKEATQLATQPGAVWAWTGEYWEAREKKAWGELPDIY

>XP_005703578.1_oxysterolbinding_proteinlike_protein_[Galdieria_sulphuraria]
MFKLKKDIRTTRKKTEEEVIEKKRVGDRRPSSAAPKTWPLESVSSPTPPTSTSNGNSGGQVSDNIVQELFNRKQGHLWKWTNYLKGWQRRLFILENGIVSYYEEKSPVSDISSTNIQTLLSSGKLLCRGKINLLLATIVPHDIDVCRFAIDLGKTIYHLRGDSEEIREKWLSSLMRSQAFLQNLLKRKPSELAVKLSSNPVESSRQYGEGLRQSSFQNHPSLASTEEILSPFEPPSEDVSPRSDEMRELQRMKQGLLNELKRIQSKLETTTSINNSERLAKLMIEIFSQEDIQNGTKGANENGQSIITATQGFSDLISWGIYVLETTCDTGTDQYLHKPTIRQSSTQFTVPSSLDPPFDEDLDDKETELEFFDAETDERNIELDATTDNDSYDERLTLSLKNSNSPSRQKTANRRTKLPVHRGDVKRPSLWSVLKDAVGKDVSRISIPVTFNEPLSFLQRMAEDIEYSELLDRASETEDPFQRLLFVSVLAVSHYCSAQQRIAKPFNPLLGETFELWLPEKNNLKFMSEQVSHHPPISASFATAGTEEKISWTYSAVHMVANKFWGKSIEVFPTGPVQVTIPRFGDYITYEKATTCVHNILIGRVWIDNYGEMVLKNHTTGDYAIIKLRKTGWLSDMKNFGEVRGIIYDRSGNVQKRMSGTWHDSLYEDLSNGKRQLLWRASKRPPPEDSGGYHFTSYAVFLNQLTPELEAHIAPTDSRFRPDQRALENAQYKLASDEKFRLEEKQRAARKKREMNGESYYPSWFEQKWNHYLQKNEWTFNHQYWHHRESHDWSKCPDIF

>XP_005707397.1_oxysterolbinding_proteinlike_protein_[Galdieria_sulphuraria]
MSDSSSEKKGNLTKNTEKPKLSKLETTGAPKTIPPEHFPVSNNEATSGQSTQTTTVPSHRRKLSSASGGSANSLLLRAGVPRMEGHLWKWTNYLKGWQRRLFVLENGVLSYFAERSTPLPENVSPDKNEGVDSSNLTICKGRINLQLAVITPHDTDPTRFAIDVDTRIYHLRADSKELRNQWVDALCKSKSYFEQLVNRAAMRLQVKSANNEEKTKKPESAIGKSTLGSKEPPPTTKQSDQAATTRELAVGQLSLQDDFDEATKSRNGLLAELGRVQSRLRSLDSKTISTAESFLKKLEEIFSPDSANSNAIALHTESTSTSSTVTNTLQGLTDTINWAIHVLTTDEGLWLRRLAVEKERRMHVETMLDTQNRTTLEQKEVGSHQNLARTVSVFEHDLDEDDGTEFFDAIGDSVRSSMDLLSPSLATSEPDEDNDAIFSPRTSSGTLQRRTKLPQPKELMQKPSFWSVLKDSIGKDLSKISMPVTFNEPLSFLQRMAEDIEYSELLDKAVTLENEFDRLLHVSALAVSHYSSTVGRTGKPFNPILGETYELFLPEKNLRFVSEQVSHHPPISASHAEGGNNEWVYSAVHLVANKFWGKSIEVFPTGTVHVFLSKYGDHITYEKATTCAHNIVIGNVWIDNYGEMVLTNHRTGSYAVVKLKKTGWLSDMRSYGEVKCVVHDKSGNPQRKMSGSWLSHLEEELPNGEKRLIWRAAKRPPPEDSAGFNFTCFAITLNELTPNIEEKIPPTDSRRRPDQRALEESRFTDAANEKQRLEEKQRTSRKMRESRGEEHVPLWFEWKYDETTEKNDWKFNGKYYIHRKEKKWDMCPDIF

>XP_002370211.1_Oxysterolbinding_protein_[Toxoplasma_gondii_ME49]
MPIHNVVALHRGNGRTATGCEEITVETESAKKLDEVPTISPLQSFESCHSEGKQDDISSVGVPCIDYSSLPHALPENGTPLPELEDPHPPRLPPRNAPYTALPLPPSALWQENFVELLLPISHCLEQKRQTGGQWHGGDISREALDTREESSTERVDHQSDNTEKSFATACSNIAGEGVPNGKPPHPGQRYDTATTVAHKITDEFGRDLDSGFTANFVDAVNAVRQPRAERTSDIAATEDVRTSSEEGTESVEAKSFCDPPENGVETEEPYLRPCTLREIPQVIVPLARRRTKLPCAKPSSSNLSILKILKQVNSSDMRNFSLPINVNEPLSMLQRICEDFEYTNLLSIARTRATSTERLAYVTIFALSAYAGSMERCYKPFNPMLGETFECSHRGFNYIAEQVSHHPPVSAYHAAAHNGDFVCFGTVSPVLSIQGTHVDSCNSGTVTLRLFLPGGGFEDYTWRRPNTRVHNIIFGTMWMEWVGVMTITNHMTSEEAHVSFLPVTSSSSSKASAGSWLSSFQWNAPSANRNLTEPASPPIAQSRRRRSNSVASDSGGGGEAEEQEKVTLGSGRKNDASSRSVSASPPLDTKRGRMNCRSDSWLSKECAGRNGLRGQVLDRAGCPRFFIDGCWSKRLWLTRVGKGSYEEFKQRNRLIEPTTGMNRDQNSGSSPSFSRGGQTSTPQKATHTSRISGRHGSGVVPLQTSRQENGSPEMNFISQTDRTAAEVRVVPADKDQVQVCCEQTRKRDHPSVASTARSKDEADITWNDEDTFFVAWEATLKPPSAKMYYNMPVFAIELNELTEGSQPNPLVVKRGGWSGMAPTDSRFRPDLRKYEDGDSAGAQAEKLRLEEKQRATARSMKGGESAWRPLWFDKGINAVTGLEDWLYNGRYWPERTRPLATSGGMIQPTRGNYCSTHVELSRFAVCPDIY

>XP_002113439.1_hypothetical_protein_TRIADDRAFT_26288,_partial_[Trichoplax_adhaerens]
SLIRSAIGKELWRVTMPIHFNEPLSLMQRICEDLEYAYLLNQAAECKDSMRRLALVTAFAVSPFSTTIGRYSKPFNPLLGETFELIDDNLDYCCFCEQVSHHPPVLAMYCEGRTWKLWQEYKFDSKFRGQFLRLSPTGDVHVKFKDNQHHYSWNRPDTIVHNLLIGSMWVDQDGIAKITNYQTQEISLMVYDSWNKAGRSYKNVKCKVRDAKDKIKFELNGAWDSYLDCTSVSGIYSHMKTERLWTIGERPAASTRMYGFTRFAMKLNQLQEGVCPTDSRCRPDQRLMEEGKILEASKEKHRLEEKQRAVRRYRANEKIEYKPRWFVMKKDPDTNEYYHMYAGGYWKARLDGNFIDIPEIF

>Cvel_7820
MRRHSGQAPSSRRGSVGSGSGRASDAGAGDQQGNERGPVHFEGPLRKYKGMAFGYRPQYFACEGDFLCYYRSEKKMGPPYKKIALSDIELIPCQAHPLEFELKLANGSKWCLKAESSDVKRQWLTTLKKVLHPSGQTQRDAQLQHATETEGDNDDDAELDKLDVKQLNEDLRKALNKIFERLGAHGESLTAAVDHISGTPRESEKLTPPASSVRRLLPRRERGGSQGENLNVDAQAESGSGSGSHRDRTLTESQAVREHLRQDLQKQEDLQNEAHRLVEDHLKKLDKWVLWQKERKKELEKQIRTLAIQHNKLEKSAVRRTRTGGTTSPQQTDLVPRHAPGGSSGSPPLPPAAAAASSGFRGASEEWEVPAERRDGSPPPRLPGTETRIKKPGEGLAVLPHGSDEDVDEDDEDDFMSVEEDSGTEGENGEVRRRRTVTENTRLVYPAHKEKKEEITGSGAATASANTSSSSSAHAAKPSEAQGAGAVAALPSAETGDGHGAGEMVSSGRGYKRRTKLPFTRTEFKLSVWSVLKDSIGKDLSRISMPVYFNEPTSFLQRFAEDLQYTEVLHQATSLDSSVDRLLRVAVFALTPLNSSVGRLVKPFNPLLGETYEMTHRGFRLISEQVGHHPPVSAYCAESDDSKWKVWGYLNLKNKFYGKSLEVIPEGVIHCELPQYKDRFTWFRGHTLIHNIIIGRLWLEWTGVVVVKNHSTGDVAAFELLRKGWWDKTMHNVRGFVADSTGKVHWRIGGRWSESIWAEPVGPLSGALPSLEKSMASLRESVGTGLEKDSRWGGVGLPEGVQLSAAEWAAVLEAAAVGERMELWRPEALPEGAEMFYNFSQFAMELNEIAPEYDPQKGAPMPPTDSRFRPDQRAWEEGDVDAAKLHKTRLEEKQRKAAKLRKGGEDAYHPRWFRKAPDPVTGKQGFIPQGDYWAAKRSRDFRLCPDIFGQDTEEAGG

>XP_024380360.1_oxysterolbinding_proteinrelated_protein_2like_isoform_X3_[Physcomitrella_patens]
MLQQSLSTISGVLGFAERLELPSKSTTTNGPILSSLPEASWRSNELFMTGNDVFELGYDQQQTAFPTAGIDRISSPEMGVMNLVQNKSGPMSPQMFRFQENDSESRGGSCSLLMRKIDVDAFLPDESTQDSIVIRPQKSVHTVTFPGEHKFKRDRRNSSMSLDEDDFDSSTLDISCIRAECFPGRKRSGHGNASDTESGSKKKSIKFNSPLHPWKRNGDSTSVITPTSSQELDSSLTKKIEKDLFVQNKEINGSSYGATCTVGEASNHGSKEGLSGTGQSKAMDGEGSTRPARNGLFSQGPLHVAWNNMQDTYSEALKEEIFRVLELEAENAVLQHALRTLPQLQQDRAALLSMRERYKKERLCECGRKIAYEDSVLEDGDDTEEDIAIVHPDVGNEEYFEALEVLNHHEFVARSTSTEEHENLLKASKQEPSEEAEIGDADFLSEAEGEEIDQPRRRLPAPRPLSRGFTMWTILKNAVGRDLNNITMPATINEPLSVLQKCAEELQYRDLLEQAVRKTDSLERLLLATAFTCASYYGSIHRDAKPFNPLLGETYEYQGKNSWFLAEQVSHHPPILAFQSENVGGAYQLFGEIELKNKFWGKSIEVLCNGGVHLKIPQYGDHITWNRATLCIHNVVVGKCWIDNYGEVSVVNHKTSEVGRVRFHKATSREQCRITGKMYDAKGIPQYKIFGNYMEAIYACPESCMNFDVNAPDVRLLWKAPEQIEDFRQQYCFTQYTLGLNELTPKLLNALPPTDSRFRPDQRALEDGNLEKATPEKLRLEEKQRSARRVRKEKGIEWQNMWFTQRDPGVSEVKSIEIENSEPSWVYKGTYWDAHDQRAWENCPDIM

>XP_024380357.1_uncharacterized_protein_LOC112284616_isoform_X1_[Physcomitrella_patens]
MEAVIPHQQRQRRRRSSASKELAHGHRKIYDPRRWHKRTNSGSDTGGRPPAGWVLIWAGRFKRWRRRWFVANPPGLLLHYKNSDQIGRHGCISLLGATVVPALGKERQFKIIKGSMVYYLRTISRDYRQPWLDAINESIRVYHYSVQRAAGVGDFGTALPSHSSMSSFNFPAFTQHMREGWEVQEREFKRRVKESLRNLEPTQQAFLEQLQMLQQSLSTISGVLGFAERLELPSKSTTTNGPILSSLPEASWRSNELFMTGNDVFELGYDQQQTAFPTAGIDRISSPEMGVMNLVQNKSGPMSPQMFRFQENDSESRGGSCSLLMRKIDVDAFLPDESTQDSIVIRPQKSVHTVTFPGEHKFKRDRRNSSMSLDEDDFDSSTLDISCIRAECFPGRKRSGHGNASDTESGSKKKSIKFNSPLHPWKRNGDSTSVITPTSSQELDSSLTKKIEKDLFVQNKEINGSSYGATCTVGEASNHGSKEGLSGTGQSKAMDGEGSTRPARNGLFSQGPLHVAWNNMQDTYSEALKEEIFRVLELEAENAVLQHALRTLPQLQQDRAALLSMRERYKKERLCECGRKIAYEDSVLEDGDDTEEDIAIVHPDVGNEEYFEALEVLNHHEFVARSTSTEEHENLLKASKQEPSEEAEIGDADFLSEAEGEEIDQPRRRLPAPRPLSRGFTMWTILKNAVGRDLNNITMPATINEPLSVLQKCAEELQYRDLLEQAVRKTDSLERLLLATAFTCASYYGSIHRDAKPFNPLLGETYEYQGKNSWFLAEQVSHHPPILAFQSENVGGAYQLFGEIELKNKFWGKSIEVLCNGGVHLKIPQYGDHITWNRATLCIHNVVVGKCWIDNYGEVSVVNHKTSEVGRVRFHKATSREQCRITGKMYDAKGIPQYKIFGNYMEAIYACPESCMNFDVNAPDVRLLWKAPEQIEDFRQQYCFTQYTLGLNELTPKLLNALPPTDSRFRPDQRALEDGNLEKATPEKLRLEEKQRSARRVRKEKGIEWQNMWFTQRDPGVSEVKSIEIENSEPSWVYKGTYWDAHDQRAWENCPDIM

>XP_024389384.1_oxysterolbinding_protein_homolog_C23H4.01clike_[Physcomitrella_patens]
MEAIAPHRSTSAAFVPHQQRQRRRRSSMSKELAQGNRKIYDPRSWQKKTHSGSDRGGQPPAGWVLIWTGRFKRWQRRWFVANPPGLLLHYKNSETVGRHGCISLLGATVVPTSGKERQFKIMKGSDVYYLRTISRDYRQPWLDAIHESIRVYHDSVQRAGRDAGIALLPQPSVPSHEREDWEDQEREFNRRVRERLKDLEPTRQAFLDQLQTLQQSLSTISGVLGFAEHSEGPVNPTTTNGLSTSPKLPETNWRSNGLFMMEDEAPESDAVQQQTVTPATGDDKLSSPGMGATKPFQNYSGPMSPWMLRVHENDHENINGSRSLLKMKSDAEAFLPKEPTQDISGIRSQNSVPIFNSRVEKKFERGRRRSLSVSLDDHDPEFFSKDVSCIGAECFSGRKRSVHGNSSDPESGSKKQPISFSGPLHHRKRNGDSAHGIASTSSEESDPSLMKKLDRDVMVQRKETDGSSHGSTSRTGGASSHGSKEDKFGVGQLKAFDKEASTGPGRNGLFSQGPLHAAWNNMQDTYNEALKEEICRVLELEADNAVLQQALRSLRQLHHDRAAHSSMRERCKEEKQCECEHKNTSEESVTEDGEDTEDDIAIVHPDVGNEEYFEALEVLNHHEFASRSMSSEEQENLAETMDVDQEPPEEADIGDADFLSEAEGEGVDQPRRRLPAPRPLSRGFTVWTVLKNAVGRDLNHITMPATINEPLSVLQKCAEELQYRDLLEQAVRKTDSLERLLLATAFTCASYYGSIHRDAKPFNPLLGETYEYQDNHCWFLAEQVSHHPPILAFQSESKSETYQICGEIEIKNKFWGKSIEVLCNGGVHLKIPKYGDHIVWNRATLCIHNVVVGKAWIDNYGEVSVVNHTTGEVGRVRFHKATSREQCRISGKIYDAKGAAHYTIFGNYMEAIYSCPETCTNFDVNGPDVRLLWKAPEQIEDYRQQYCFTRYALALNELNQKLSDALPPTDSRLRPDQRALEDGNLEVATPEKLRLEEKQRIARRVRKEQGIEWQTMWFTQREPGSSEVKSVENGVTEPSWVYKNTYWDAREKRDWENCPDIM

>XP_024380725.1_oxysterolbinding_protein_homolog_2like_isoform_X1_[Physcomitrella_patens]
MEAMAHHQQRRRRRSTASKELAHGNRKIYDPRRWHKRTNSGSEIGGQPPAGWVLIWAGRFKRWRRRWFVANPPGLLLHYKNSNQIGRHGCISLLGATVVPTPGKERQFKIMKGSMVYYLRTIRRDYRQPWLDAIHDSLRVFHDSLERAQGGAGGGTSLLPQHSVPSHKREDWEAQEKELKRRVRERLRDLEPTRKAFLDQLQTLQHSLSTISGVLGFADTPEVPQKSTTSALPALPRLPETNWRSNGLFMTEHEALDSDVPQQHNGSPATGDDRISSPEMGASNSRQNHSAPISPRTSQLHDNDPNSRSASRSFLKWKSDPDTLTLTDSTIDLSCIRSQKSVPVFETLIDKKFRGDRRRSLSFSMDDPDCFPQDMSCIGAECFPVRKRGGHGNASDTESSSKKQPVRFSSPLHQRKKNVESVYNFTPNSSQELDPSLMKKLEKDVFVQSKESEALLHGSASKTSGVSSHCSKEVRFGVGQLRAIDNGGSTGPGRNELFSQGPLHAAWNNMQDTYTEALKEEIYRVLELEAENAILQQAMRSLPQLQQDRAALYRLKERNKKQCECGRKNISEEEIEEDGEDTEEEIAIVHPDVGNEEYFEALEVLNHHEFAARSISPDEQGILAETADGNQEPPEEAETGDADFLSEVEGEEIDMPRIRLPAPRPLSRGFTVWTVLKNAVGRDLNHITMPATINEPLSVLQKCAEELQYRHLLEQAVQKENSLERLLLASAFACASYYGSIHRDAKPFNPLLGETYEYQDNRCWFLAEQVSHHPPILAFQSEDIGGGYQIYGEIEIKNKFWGRSIEVLCNGAVHLKIPKYEDHITWNRATLCIHNVLVGKAWIDNYGEVSVINHTTGDVGRIRFHKASSREQCRITGKMYDSKGVAHYTIFGNYMEAVYSCPESCTNFDINGPDVRLLWKAPEQIEDYRQQYCFTRYSLALNELTPKLSYALPPTDSRFRPDQRALEDGDLDKATPEKLRLEDKQRIARRVRKEQGVEWQTMWFTQRDPEVSEVKTIEEGNVEPSWVYKGTYWDAREKLDWENCPDIM

>XP_024360842.1_oxysterolbinding_proteinrelated_protein_3like_isoform_X2_[Physcomitrella_patens]
MRGSMVYYLRTINRDYRQPWLDAIYESIRVYRDSAQTAQGGGYYGTALLPQPSVPSHAREDWEIQEKELKRRVRERLRDLEPTRKAFLDQLQTLQQSLSTISGVLGFADHGEVPQNSTTNGFPTLPRLQETNWRSNGLFITENEVSNLDVSRQQNGTPSTGDDKLSSPDMGASNSFQNHSGPTSPRMNQYHENEPYSRSGLRSLVKFKSDSEALMPKKSTKDINGSRSHKSMPVSDVTADEKFGKGRRRSLSLSVFEHLEDDTESFSQDVSCIGAECFPVRKRIVHGNASDTESGSRKPLKFSGPLHHQKKNGDSVYNFTPSSSQELDPNLMKKLEKEVFVPNKENEMSSGSASRSGGGSNHGSKEVRFGAAQLRAVDKEGSGGPGRNGLFSQGPLHAAWNHMQDMYTEVLKEEIYRVLELEAENAVLQQAMRSLPQLQQDRAALLSLKERHKKQCECGRKLTSEEEVEEYGEDTEEEIAIVHPDVGNEEYFEALEVLNHHEFASRSISPDEQGILGEPADGNQEPPEEAETGDADFLSEAEGEEIDQPRRRLPAPRPLSRGFTVWTVLKNAVGRDLNHITMPATINEPLSVLQKCAEELQYRHLLEQAVQKKGSLERLLLASAFTCASYYGSIHRDAKPFNPLLGETYEYQDYHCWFLAEQVSHHPPILAFQSEDTGGRYQIYGEIEIKNKFWGRSIEVLCNGAVHLKIPKYGDHITWNRATLCIHNVLVGKAWIDNYGEVSVVNHSTGDVGRIRFHKATSREQCRITGKIYDSKGVPHYTIFGNYMEAIYSCPDSCTNFDVNGPDVRMLWKAPEQIEDYRQQYCFTRYALALNELTPKLSYGLPPTDSRFRPDQRALEDGDLEKATPEKLRLEDKQRIARRVRKEQGIEWQNMWFTQRESGVSEVKTIEEGNAEPSWVYKGTYWDAREKQNWEGCPDIM

>XP_024360828.1_uncharacterized_protein_LOC112275066_isoform_X1_[Physcomitrella_patens]
MQPAMEAMGPHQQRRRRRSSVSKELAPGNRKIYDPRRWHKRTNSNSDVGGQPPAGWVLIWAGRFKRWRRRWFVANPPGLLLHYKNPDQIGRRGCISLIGATVVLTPGKERQFKIMRGSMVYYLRTINRDYRQPWLDAIYESIRVYRDSAQTAQGGGYYGTALLPQPSVPSHAREDWEIQEKELKRRVRERLRDLEPTRKAFLDQLQTLQQSLSTISGVLGFADHGEVPQNSTTNGFPTLPRLQETNWRSNGLFITENEVSNLDVSRQQNGTPSTGDDKLSSPDMGASNSFQNHSGPTSPRMNQYHENEPYSRSGLRSLVKFKSDSEALMPKKSTKDINGSRSHKSMPVSDVTADEKFGKGRRRSLSLSVFEHLEDDTESFSQDVSCIGAECFPVRKRIVHGNASDTESGSRKPLKFSGPLHHQKKNGDSVYNFTPSSSQELDPNLMKKLEKEVFVPNKENEMSSGSASRSGGGSNHGSKEVRFGAAQLRAVDKEGSGGPGRNGLFSQGPLHAAWNHMQDMYTEVLKEEIYRVLELEAENAVLQQAMRSLPQLQQDRAALLSLKERHKKQCECGRKLTSEEEVEEYGEDTEEEIAIVHPDVGNEEYFEALEVLNHHEFASRSISPDEQGILGEPADGNQEPPEEAETGDADFLSEAEGEEIDQPRRRLPAPRPLSRGFTVWTVLKNAVGRDLNHITMPATINEPLSVLQKCAEELQYRHLLEQAVQKKGSLERLLLASAFTCASYYGSIHRDAKPFNPLLGETYEYQDYHCWFLAEQVSHHPPILAFQSEDTGGRYQIYGEIEIKNKFWGRSIEVLCNGAVHLKIPKYGDHITWNRATLCIHNVLVGKAWIDNYGEVSVVNHSTGDVGRIRFHKATSREQCRITGKIYDSKGVPHYTIFGNYMEAIYSCPDSCTNFDVNGPDVRMLWKAPEQIEDYRQQYCFTRYALALNELTPKLSYGLPPTDSRFRPDQRALEDGDLEKATPEKLRLEDKQRIARRVRKEQGIEWQNMWFTQRESGVSEVKTIEEGNAEPSWVYKGTYWDAREKQNWEGCPDIM

>NP_595710.1_putative_sterol_binding_ankyrin_repeat_protein_[Schizosaccharomyces_pombe]
MEHPSPDSVSSTSSSDHKKAELSDSLKQLQLLQAFQAGDIKQVDNLLHNKSKDECTHALFISIQCANVQMVKHILSVFDVDVNAYDKNKNTPLHLAAMAGRQDIVEALLLHPDINYNLVNANNKKAYQVATSPQLMDFMKGFYVTYTKETAREFKKAFKERNLESMDYLMRHNEFNDAIDLNEVDIKTGQTYLHVATKAKDAELVKWLLDNGADPYRRDKFGKLPTDYTKDENMRSLLRSYSGNRDSSSAPAVPQHMSGYLKKWTNYKSGYKLRWFTLNNGVLSYYKNQDDASSACRGSINLKLARLVHDPKQPTVFQVIGKGSVRYSVKANSPVEAKKWIAAISSAIENDEEANKPNVTADNASFGTHDLAPAAHKFTQSNASGNSGWDDNESDIDRAQLPSRENFEFNVNIAKLQVETLHKLIDSAMQTEKVKKDPSLSQVFDGISNSFNTLHKTVLEMLDLQRQAEHYYKRKLDNAKAINALWAENLKTVVEEQDQIEERYHRSEAHRRRTKRAFRRLAASLKKRPSDKDNKLHIHYDDGAMSSTSYSTDFTDDEEETNTKDEFFDVDAHDNNHANKAEPSQTANNVHEIREPSFSSEHKPQPSLKTTTDVSSPETKQNIADIRKTTLTDQTEEFTERRDNNGSIPSKQPSDEQHLGKESLPSQQSTVSNHHRKESIPSKQPTEGQHARQESLPSQQTTETKHLRKESTPSKQPTEGQHTRQESLPSQQTTETKHLRKESIPSKQPTEGQHARQESLPSQQTTETKHLRKESIPSKQPSGGQQLRQESLPSQQSSESKQSTQHQQPVEVQKSIQSDVSAPKAKEVSEKPVSHQAKPSNASQLSRNTDDTQAKEAPKEASIPDNASTASTKVSNDSHLKPDADKKSVSSELTHASKPSLDEKTMQLAKQIAVSFHGYEAPTRENLDVNDDRPKISLWGILKGMIGKDMTKMTLPVSFNEPTSLLQRVAEDMEYTELLDQASHNKDPYQRILYVAAFAASEYASTLNRVAKPFNPLLGETYEFCHPQRGFRFIVEQVSHHPPVGAAYSESANWKYYGESSVKSKFYGKSFDISPLGTWFLELRHPSGEVELYTWKKVTSSVVGIILGSPSVDNYGQMHIVNHSSGINCVLDFKPRGWRGTNAHEVKGSVQSTDDTPKWMVNGHWNDKIFGQQPNGNKILLWQNHERPPRPFNLTPFAISLNALTPQLKPWLPPTDTRLRPDQRAMENGQYDLAASEKNRLEEKQRKKRRMREQGEMPPWSPRWFSAAKHPVTGEDYWQFNNEYWKIREEAGEAHLAGKEFEWPNVDDIF

>XP_004349793.2_hypothetical_protein_CAOG_01273_[Capsaspora_owczarzaki_ATCC_30864]
MASEQAASTDGSHSYGQQLLAGARSNNVELVRMLLQRPGIDVNVRGQGMGTGGLTPLQMASFFGHTAVVDLLLQNGADPNLQDKEGETPLHRAAMSDRREILQLLLKHNADVTIRNGMGMTAQALARNEDVRRLLRAADDAQRLDIETKFLTAARDGNTTLVAHLIDGTSPPNLNCRDRNGNTALHCAANRGHKAIVILLLQHGVDTAILNNQQKTAQLLAKDDQTRDLLLVSPVSARHRLESARIEGALSKSSFRGWKLRWFVLDNCTLSYYNSASEARSGKGRVLDSVHLGTAVVSPDASDPLVFRIKGNSWAYQLRTEKADDRLRWLTDMRDQQTYFSLAVPVTESSVQQSSSRASSQPLPFSGRLKSDLDDATLPRLGPLAESLEAAARDREALEKQLDGVETAVDAAAQQVAALSKSSPMQGAAAEVVKNADDIVRTLKQSRETSRALWRTLSHCLNIMSHHEHVWTKRFELEKERRRVLEESISKLAAEHDQLERSVISISSRRSSHLDLASMGENECFFDASDGDFDEHGLPVDSDDDDAFTDSAYESNAPPHARVATAAAAKLSSSAAASSASLSSTDSSSTLPAGTFGENALATSRTSVVNGKRVHRTTLAQYMVDRKNVSLWAFLKQCMGKDLSKITMPVLFNEPVSFLQRLCEDLEYASLLDTAAQHPDPLMRIQYVMAFAASGYAATANRLGKPFNPLLGETFELERDLENGSVMRALCEQVSHHPPISALVCESPHFVFHEYNDVRIKFWGKSIEIVPTGNEHVRLRIGDSGSEDEEFTWSKVTTCVHNIIVGKLWLDQYGKMEMVNHTNNVRCVLEFKPRSLWFSPNSGCELEGYVLDAAGNRTHLLAGWWNDSLYSISLKDYYASPAGAAAAAAAATGSKKKAVAPTIAAEALRVHPAAKRLWVRNPLPEISSKMYNMTTYAMALNEVDSELAKSVAPTDSRLRPDQRALENGLVDLASSEKNRLEEKQRLTRKVRARQNQEHVPMWFTEREDAYNGMNGWLYRGGYWEAREKGQFDACPDIYGDAPQSG

>XP_004989237.1_uncharacterized_protein_PTSG_09883_[Salpingoeca_rosetta]
MEKYALYSKPKDETDLDDTLKQWHGEVRETIPLPRPKAGSGFWAALKSAIGKDITHVSMPVHFNEPISFLQRLTEDLASSDVLDNAAKQTDSLKRLAYVAAFSCSMYASSGTGFRNYKPFNPLLGETYECVRPDLGFRCICEQVSHHPPISAMHAESASGWVVKQEYQGVVKFRNVMRVIPHGIASVEFPEDNERYTFTKQTLVVHNIMFGRMWVDHEGTVTITNHRTGETCDMVWSPYSSVGKRYFNLHGYVKDAEGRVQYTINGRWDEGLVLIPGEVQWAHLRDSTQLKDDSFERLWTAPPIPPDCKEKYGMTTFSMSLNNKEDNVCPTDSRLRPDQRLLEDGDMQTASDTKRALEEKQRAARKAREAEKEQHTPRWFQLVEDPETDRTWFTYKGSYWDDKAQGKFANKADYPDIYV

>XP_002110893.1_hypothetical_protein_TRIADDRAFT_22947,_partial_[Trichoplax_adhaerens]
NRTSLPAPMMSREDITIWSILKHSIGKDLSRITMPVYFNEPLSFLQRLAEYMEYDQLLDIAAESQDPLIRIQYVAAFAVSSSASNWNRIGKPFNPLLGETYELVTHRFQLVTEQVSHHPPISAFHCRSLNNNYSLSLSVQPKLKFWGKGVEVIPKGVAILEFPKLGEIYTWSQVTTYIHNVITGKLWIEQYGNLDVINHTNGYKCSINFKPSGWFGKDLNRLQGFVTDANKEKAYSLEGKWTEELHSNLLNPALIKTRKSSKTSLPTSKDADEDLENDGKSSLNPSQSTANSLAVPYQNTSKTSSNNDLTDKPMYGMTAFSFMLNELTTTLEKYLPRTDSRFRPDIRYLELGSTDKAASEKLRLEEKQRAARRERAKNKTEYQPKWFYQTTNKFIGAQVWEFNGKYWNGDYEDCPHIYEDK

>XP_005536178.1_oxysterol_binding_protein_[Cyanidioschyzon_merolae_strain_10D]
MERDPFLGQEQHALDANARERTLTKENLAQLTPVHRAAQSTLVPAPASNAVDDNKGLFVTSGGAPDAECGASRKSPKMDDEKAKRETCSVPGAEVASETDPGTAVQPSTAQEASIEPTETTLVTEHAVPQSLLPAADKDEYKPASRRLKSTKTDRLPFRGVPRMEGHLYKWTNYLKGWQRRLFVLENGVLSYYVERTAHAGAADEAHALSATSNAAASGNPNAPGVASLLSPRRLFGSWNAPESPEVERACKGRINLQLAVITRHDTELSRLIIDTGTQIYHLRAESNDLCQQWLDALLRSKSYFERLARRAAARRLKAVGDTPGDANPSAGDHPPSEHAHHSSRSEPGANGQPSKRSPTPGVVVAASRESAPGSRGELEADRTATDEDDDEEDEDARLEREFGEEDEATLQARQAREELLAELVRFQGHVREAVTQLSPPDLLHVLVKGLWNEEPSTESAGGTHDVVAVLSALLELLTWCIHVLQSDGALWRHRLVAERARALRAEAEGAALQRQLDALLRELERIEWFSQASPEWETNDRSRSPSQHVASVADTDDGTGDTDEFFDAGSGSVVSTPWSSPSTATATEATGVEAGISATSLTPGSSAIRPSWVPTSSESLAERTWRVLERLRRASTEARRRSPNLCEANLLTQPPASADNQLQSSTSSAVTETSSSCASAVVVPQNETFVTIPREPRRRLPISDSETPPKPSLWSILKDAVGKDLSRISIPVVFNEPISFLQRLVEDVEGAALLDRAAATVDPALRLLLVAAFAVSHYASTLGRTGKPFNPLLGETFEFVTPEPSSIRVLCEQVSHHPPVSASYAVGRDKRWVYHTTCEVRNKFWGKSIEVFPYGKCHVHIPEFDDHITYRKATTCVHNILVGKMWIDNYGEMVLVNHRNGYRCVVKLTKTGAFWGSRDTYGSVSGRVFDADGRECPLRLAGSWLSALRVEFLQEPLGDQPRVLRAETVWTRPVEPPPGASGPFHMTQFAIALNELTEELRVVLPPTDSRFRPDQRFLENADYSKATAEKLRLEEKQRAARKAREQAGKPWKPLWFEPERDPQSGDIEWSFNGRYWSARQRYDWSQCPDIF

>XP_001746379.1_uncharacterized_protein_MONBRDRAFT_32711_[Monosiga_brevicollis_MX1]
MAAAGAESTAATAAADGSEVTATGASAYGRDATTLQESFETVRDVAERTILENPRPTNGSGVWGALRAAIGKDLSRIAMPVHFNEPTSFTQRLVEDLEYSSVLDRAAAESDSLRRLAIVSAFANAMYASSAPGIRTYKAFNPLLGETYELIRPDDGYRVVTEQVSHHPPVTALHAESERGWVYRQHYACDLKFRGTLRLDPYGIAVVEFPNGDRFSWVKPTTVVHNILLGRLWVEQVRNLLACAMALLQRRDCSSNIQALFVILFCFPAGYVKDADGVIRYTLHGRWDEGLVLLPGEVPLKKLPAGLKVLQDTHADHVWSANPLPASHKPFYGMTTFAMGLNQKLVCNDHMSTSEAAHGDNVCPTDSRLRPDQRLLEDGDFMRSTAEKERLEVKQRAARAAREEQQAEWQPRWFSKVMDPQLGRELWSYQGGYWDAKADGSFKDASRFPDIF

>XP_011269972.1_hypothetical_protein_CAOG_08402_[Capsaspora_owczarzaki_ATCC_30864]
MADDDNDEIFEDAEDNAGIISDADRVDDEAQPAMEESPNSIAINPSANDLNDLNAFQAETAESQTTLMLEAAGVEGFLEKYKKTRKQRRSELPMADIKVSPSFWSVMKNSIGKDLSKIAMPIDFNEPLSLLQRLVEDFEYASMLDRASASDNPFERLAFVAAFSLTAYATSEGRTGKPFNPLLGETYECVREDRGRGWRYLSEQVSHHPPISACHCDAPEWECWQEYRLGSKFRGQYLKVNPEGPVHLKLKMHGEHYSWTKPVTTIHNMIVGKLWIDHEGEITVRNHLTGDRAVLTIQPWHVVGKDFKNVRGGVFDHRGNKVMTISGTWDGSLVASPVDQPKRTIELWKVVPRRSNSIRSYFGFTDFSMQLNELEPGLCPTDSRLRPDQRLMEVGDLANGTQEKLRLEEKQRAARRQREVAQQPWIPKWFTRRADRDTKEVLWVYRGGYWDAKQSGQFGATPNIF

>NP_611865.1_uncharacterized_protein_Dmel_CG3860,_isoform_A_[Drosophila_melanogaster]
MAEGDYAEHVERTELPATMISRKEVSIWAILKNCIGKDLSKITMPVMLNEPLSFLQRLCEYMEYAQLLTEAAQQEHPADRMKYVAAFAVSALASNWERLGKPFNPLLGETYELQKGDYRIVCEQVSHHPPVSAFHAESKDFKFHGTISPKIKFWGKSVEVNPKGTVTVEFPKWNESYSWTNVNCCVHNIIVGRLWIEQYGKMEITNHATGHVASLTFKSAGSGAKNLHRVEGFVKDASETNLYFLYGKWTEFIKCCSAESYVQFLKQGTRKNDDYDGSPNGTPKKMFSKLNSFKLNSFRSLSIQDSDSYPPMEQEGDIPKSDSAYSLDIPDSTTLWSCKPRPSNCSEYYQFTHFALQLNAMDSNMKPPLTLCPTDSRLRPDILHLEEGNLDGASKEKTRLEEKQRHTRKQRKSTNSDDWSPRWFKYATNPHTKIDDWLYSGGYWDRKYDNTDTIF

>XP_002587982.1_hypothetical_protein_BRAFLDRAFT_88961_[Branchiostoma_floridae]
MAARQTEEQVWTHSDVDMMGPKDMLLHCARNGKIELVEDLLKSRYEGKLQLDLNCKAAENSQQLQVEAQLLSAAREGHLEQLAHLLTGTRSLNINCTDISGNTPLHCAAYRNQKEAAVILLQHGADPTLRNSGDQTPLDLVRTAQMRQLLDVKPIKDIQKHVQRFEGLLLRRWVNALHDHITFSNHYTQQPQMSDDDDELNTQPLGNMENALQTAHAHQQILEKQISDMTAVLEGVDINMQGPVTQKLNQLRTTSRDMYTAMTHCLSLLTQQEEVRKVRLQQEIEKSRVLQDALHVLATEHHQLESSLSSTSRPRQLPASFCDASDDEFYDAFSGSGGSPRSFVSLEEDNSPTSSSPQYGACRHTCKQEQQKLDSAAQIVEMSASASTTYRNCLPAPAFDKDDFSVWTILKQCIGKELSKITMPVVFNEPLSFLQRLCEYMDYSYLLDKASASEDSLVRLQYVTAFAVSACSSNEHRLSKPFNPLLGETYELDRPDLGFRIVAEQVSHHPPISAFYAEGKQWLFHGSVHPKLKFWGKSVEIQPKGMITVELPSHGEVYTWQNVNSCVHNIIVGKLWIEQYGEMEVKNHNTAERVILNFRPSGWFGKELHKIDGYVYDKEKNKRRGLYGRWTENMYSVDVELFEDMKRKAKEKKKGKKETSPSPTKLFRRNGTSSNPPQDSADGAVGEEEVRLPVSPSEEADQHSPDEENMKEMLDHPDSSQLWQVVPRPDHSKQYFHFTNFAMTLNELLEGMDEQLPSTDCRFRPDIRLLESGDLDKAAQEKNRLEEKQRAARKLRIKQKQQWTPR

>XP_032236661.1_oxysterolbinding_proteinrelated_protein_1_[Nematostella_vectensis]
MSASKKSDREEKLLQAARRGELQTVNGLLKDKSGSPSGIDVNCRGKSKANNGWTPVLLASYFGHKDVVEILIKAGADINAQNGMGYTALHLASFTGRTAVVLLLLENNADVTIINGEGKTPSQVANKDEIKQLILAAEKSHQLALQEQLLTAARDGNTNEIKRLVSLPDPPDINCRDSMGNTPLHCAAYRGHKEVAVTLLQNASDTSLKNNSGQTALQLTRDSRMKKLLDVQPLQVTKKNNCIRQFSSRKKKTINKIVPRHEGILLKRSRFFGVKKYWVVLERGVLSYFHKRADAASGHKRQGFKYLDHAKFSVTPFLPHHLPREILGYLLFYPIIYRAKFLVKLLFYPIIYYAKFLVNLLFYPIIYRVKFLVNLLFDPIIYHAKFSVPKEEKHKIKIQYSDNTVHIWSVSPNDPAPQVQRQRWLNSLHEHCAYSTHYTTQPTLLVDEYDQNFLPLGDIQTSIKEAQAHQQSLEQQVSAASKLISNFDSTSSKGGHLSLLNIKTALDEIVLSSKEMCAVLGHCINVLAQQEEVRSHHMEEEVEKRQMLKCASMSLLLYFRYGVFTWRINEKCSIGINEMLHTSKLSLVSDSDEFFDAVSDIACSLPDEMPSDSDEESEVYVPADITDPASDQESTTTLRKCDSGQNLNRSLPPGLTRSSSDTTLPRREPSNLVVEGLQKSKSESKDMEREYEERGRKMSEKQENVEENGAEASVPRHRTRLPTHMLSRNEFSVWTVLKQCIGKDLSRITMPVIFNEPLTFLQRITEYMEYSELLHTAASQDDPTRRLQYVAGKWTTSSNLDRVGKPFNPLLGETYELVRPGFRLVAEQVSHHPPITALQCESDDFIFHVTVQPKLKFWGKGVEVQPKGMVTLKFPKHNEVYTWNNVNSCVHNIIVGQLWIEQYGQIEISSLSSGDRATIHFKPAGWFGKELNKVEATIHCAQDKKKRYTLKGDWTDKITCYRSETHVTRKQSKRGKQDFEIASTSSSETSLELHSPVTLWTCSHRPPHSKESKLHSLVTLWTLSHRPPHSKEVSTNSQELHLPVTLWTCSHRPPHSKEMYNFTSFAMQLNELLPRDKETLPPTDSRLRPDCRALENGDLDRATAEKIRLEEKQRAARRERQKSDQEWAPRWFKEEMNPYTGQMDWLYSGGYWDRDWQECPDIF

>XP_001620532.1_oxysterolbinding_proteinrelated_protein_2_[Nematostella_vectensis]
MYNFTSFAMQLNELLPRDKETLPPTDSRLRPDCRALENGDLDRATAEKIRLEEKQRAARRERQKSDQEWAPRWFKEEMNPYTGQMDWLYSGGYWDRDWQECPDIF

>XP_021322307.1_oxysterolbinding_proteinrelated_protein_1like_isoform_X2_[Danio_rerio]
MLSSANTHTHTHSLTHAPVLHFTHLQPQIQEQQRRRSHRGRSENSVAPEADVMSGDSSQGDQTQRNGVKNHRSALPAAMFSRNNISMWSVLKKCIGMELSKITMPVIFNEPLSFLQRLTEYMEHTYLIHRANASQDSIHRMKCVAAFAVSAVASQWERTGKPFNPLLGETYELVREDLGFRWISEQVSHHPPISAFHAEGIKKDFMFHGSIYPKLKFWGKSVEAEPRGIISLELPGHSEAYTWTNPTCCVHNIIMGQLWIEQYGNVEIINHNKKKVCALYGKWTECLYSVDPAAFEAHRKSDVKRPEKSSTPSSHAEEEPDEMPPPEAETVQLIPGSELIWRISPRPDNSGKYYAFTTFALQLNELDVEMEKVLPPTDCRLRPDIRALENGNIDIASAEKNRLEEKQRTARKDRSKSNEEWKIRWFHQGSNPHTGAPDWLYNDNYWSRNYSQLPDIY

>XP_021329132.1_oxysterolbinding_proteinrelated_protein_1_isoform_X1_[Danio_rerio]
MEELDPEEQFLRDARNGNLEGIQRLLMCKIKEEANIDINCKGKSKSNHGWTPLHLACYFGHRDVVEALLKAGADANLPNNVGDTPLHKAAFTGRKEVVMLLLQHDACASVINGMAQIPKDITQSAEIKSMLEATERTEERKLEEQLLEAAREGAVSTLTRLLNLKKPPNINCTDLLGNTPLHCAAYRGQKQCAVKLLQHKANPNVKNKNDQTVFDLTNDAEMKQIIAGNVVKGMTRHVKMFEGPLWKSSRFFGWRSYWVVLQDGVLSWYPKQTDADSNTRRQGCKPLTQAHCMIKAKDNCYFTVKCFDDSVHHFKVTQKNNPEESRKMWLEAIEEHSAFSTHYCSQEPDSEEEEDNAVSVNELSESLQRAESCHQRLEKEVLSLLSMVKEDGLAEKIPVTVIQKLKDVCEASSESCSSLHRCLELFSRQEGARSVKLEQEVEKNKILSEALQTLATEHHELEQSVVKGSSPRSVLSDDEFYDALSDSDSEPVLSGFQTDGHSHEDHDDFTSELYCSIPGQHSGRMSQEERRGEEEDDEEVANVNGLRKHRTSLPAPMFSRNDFSIWSILRKCIGMELSKITMPVIFNEPLSFLQRLTEYMEHTYLIHQANSSENSIERMKCVAAFAVSAVASQWERTGKPFNPLLGETYELVRDDLDFRLISEQVSHHPPISAFHAEGLQKNFVFHGSIYPKLKFWGKSVEAEPKGIITLELPKHNEAYTWTNPTCCVHNIIVGQLWIEQYGNVEVINHRTGEKCCLNFKPCGLFGKELHKVEGYILDKSKKKVCVLYGKWTECMYLVDPATFETHKKNDKKASEEKKSSKQSQSSDSEETPQPGGDSLEVIPGSQLLWRIAPRPANSAQMYSFTSFALQLNELDKEIESVIPKTDSRLRPDIRAMENGDIDMASEEKKRLEEKQRAARKNRSKSDDEWKARNIASGPRWFHQGPNPHNGSQDWLFSNSYWDRDYSQVPDIY

>XP_017950540.1_oxysterolbinding_proteinrelated_protein_1_isoform_X1_[Xenopus_tropicalis]
MRSAMNSEADEQLLHDARNGNLEEVRELLESNRKGQTVVNIDCKGKSKSNLGWTPLHLTCYFGHGQVVKDLLMAGAAVNVQNDMGDTPLHRAAFTGRKDIVMLLLEYGADTTVINGEGQTAKDMTHDKEIKTMLEAAQRTQEIKLEEMLLAAAREGNILRLSELLNKPKPPNINCTDQMGNTPLHCAAYRGLKHCALKLLKCGADVNARNKTNQRPIDLAQQLEIKQVLQSRVVKHVLRNLQRFDGALCKSSRFFGWRVFWVVLEHGVISWYQKQADAINNTYRQGCKHLTQAVCTLKSTDRYSFSVKCFDDSIHYFKILPKNLKHTREYDAQQQSSFTTKHCDWLTAIEEHSAYSTHYCSQDQLSDDEDEELVLVGDLKQSLENAQTSLQRLNKEVSQFAGGLTKWEGAKDIDPIILQQLTEVSEASQDTYKALNNCLLLFTKQEAVRNLKLEHEQEKNKILSEALQTLATEHHELEKSLVKGTPPLHTILSEDEFYDAVSDSDSDHSLSGFETVTSSSPDGSLNLSYNQQVSMSEEKKHGGGGGGSTSNGIKKHRTSLPSPMFSRNDFSIWSILRKCIGMELSKITMPVIFNEPLSFLQRLSEYMEHTYLIHKANQCSDTVERMQCVAAFAVSAVASQWERTGKPFNPLLGETYELVREDLGFRLISEQVSHHPPVSAFHAEGINNDFVFHGSIYPKLKFWGKSVEAEPKGIITLELLKHKEAYTWTNPTCCVHNIIVGKLWIEQYGNMEITNHKTGEKCILNFKPSRLFDKELHKVEGYIQDKSKKKLCSLYGKWTECLYTTDPATFDAFKKNDKKEVEEKQVKVKQAGNAEEPDEMPLPDSESVQVIPGSTQLWRIAPRPPNSAQMYNFTNFALALNEFDKDMEGTIPKTDCRLRPDIRAMENGEIDSASEEKKRLEEKQRAARKSRSKTDEEWKTRWFRQGPNPYNGSQDWLYSGNYWDRNYSNLPDIY

>XP_015133467.1_oxysterolbinding_proteinrelated_protein_1_isoform_X1_[Gallus_gallus]
MSTEAEQQLLHDARNGNAEEVKQLLDTMSKGEIIFDINCKGRSKSNMGWTPLHLACYFGHAVVVEDLLKAGADVNVLNDMGDTPLHRAAFTGRKEVVMLLLQYNADTSIVNGSGETAKEVTHDKDIRNMLEAVERTQERKLEEELLGAARDGETGKLSALLNKPKPPDINCVDQMGNTPLHCAAYRAHKHCALKLLKNGADPKIRNKNDQTPLDLAQGAEMKLILGSKTGKVINKPLRRYEGLLWKSSRFFGWRLYWIVLEHGVLSWYRRQADAVNNEHRQGCKHLTQAVCTVKSTDSCFFSVRCFDDTVHRFKIPKNNLPSHTRESWLEAIEDHSAYSTHYCTQEQLSSDDEEDDTVSVTDLQETLKKAQACQQRLSKEISDFLAMVKSLDVTKGISSPLLQKVDVVSEVSQETCEALADCLNLFTKQEGVRNLKLEHEQEKNKILSEALETLATEHHELEQSLVKGSPPLSIISEEQFYDAVSDSESEKSLSGFETTTAYSLEDSMDSKDTITSSVAEEKVCGSGESMSNGIKKHRTSLPSPMFSRNDFSIWSILRKCIGMELSKITMPVIFNEPLSFLQRLTEYMEHTYLIHKASSLSSTTERMQCVAAFAVSAVASQWERTGKPFNPLLGETYELIRDDLGFRLLSEQVSHHPPISAFYAEGLNNDFVFHGSIYPKLKFWGKSVEAEPKGTMTLELLEHNEAYTWTNPTCCVHNIIVGKLWIEQYGNVEITNHKTGEKCVLSFKPCGLFGKELHKVEGYIQDKSKKKLCALYGKWTECLYSVDPATFEAYKKNDKKNAEEKKSSKQVSNTEEPDEMPLPDSESVYVIPGSILLWKITPRPPNSAQMYNFTSFAMALNELDKEMESVIPKTDCRLRPDIRAMENGEIDLASEEKKRLEEKQRTARKNRSKSEEDWKTSHPSSQSPRWFHQGPNPHTGTQDWLYSGNYWDRNYFNLPDIY

>XP_001362440.2_PREDICTED:_oxysterolbinding_proteinrelated_protein_1_isoform_X1_[Monodelphis_domestica]
MTGEMSTEAEQQLLHNSRNGNTEEVRKLLGSLERKEVVANINCKGRSKSNLGWTPLHLACYFGHRQVVQDLLKAGAEVNVLNDMGDTPLHRAAFTGRKELVMLLLEHNADAVVVNGSGQTAKEVTHDKEIRSMLEAVERTQQRKFEELLLAAAREGNTAGLTTLLNRPNPPNVNCSDQMGNTPLHCAAYRAHKHCALKLLKSGADPSLKNKNDQRPLDLAQGLEMKHALGGNKVVYKVLKRYEGPLWKSSRFFGWRLCWVVLEHGVLSWYRKQLDAISNAHRQGCKHLTQATCTVKPTDNCLFFVKCFDDSMLGFRVPKNNLHQSRESWLEAIEEHSAYSTHYCSQDQLSDDEEEDDAFSTINLRESLQKAQECQQRLDREISNFFTMIKECDMAKEILPSFLQKVEAVSEASGETCAALNDCLNLFTKQEGVRNLKLEQEQEKNKILSEALETLATEHHELEQSLVKGSPPLSILSEEEFYDALSDSESEQSISRLETVTARSFEERRELLNNRKSRMSEGKDCGGGDSLSNGIKKHRTSLPSPMFSRNDFSIWSILRKCIGMELSKITMPVIFNEPLSFLQRLTEYMEHTYLIHKASAFSDAVERMQCVAAFAVSAVASQWERTGKPFNPLLGETYELVRDDLGFRLISEQVSHHPPVSAFHAEGLNNDFIFHGSIYPKLKFWGKSVEAEPKGTITLELLEHNEAYTWTNPTCCVHNIIVGKLWIEQYGNMEITNHKTGDKCILNFKPCGLFGKELHKVEGYIQDKSKKKLRALYGKWTECLYSVDPATFEACKKNDKKNADEKKSSKQMGTSEEPDEMPLPDSESVHVIPGSVLLWRIAPRPPNSAQMYNFTSFAMVLNEVDKEMESVIPKTDCRLRPDIRAMENGEIDQASEEKKRLEEKQRAARKNRSKSEEDWKTRWFHQGPNPYNGAQDWLYSGSYWDRNYFNLPDIY

>XP_006526204.1_oxysterolbinding_proteinrelated_protein_1_isoform_X1_[Mus_musculus]
MNTEAEQQLLHHARNGNAEEVRKLLAAMARMEVVADIDCKGRSKSNLGWTPLHLACYFGHKQVVEDLLKAGAKVNMLNDMGDTPLHRAAFTGRKELVLLLLEYDADSTVVNGSGQTAKEATHDKEIRNMLEAVERTQQRKLEELLLGAAREGRTAEVSALLSRPNPPDVNCSDQLGNTPLHCAAYRAHKQCVLKLLRSGADPSLKNKNDQKPLDLAQGAEMKHILVGNKVVHKALKRYEGPLWKSSRFFGWKLFWVVLEHGVLSWYRKQPDAVHNSYRQGCKHLTQAVCTVKPTDSCLFSIRCFDDTVHCFRVPKNSVQQSREKWLEAIEEHSAYSTHYCSQDQVTDDEEEDVVSAMDLKESLARAQTCQQRLDREIYNFLKMIKECDVAKDMLPSFLQKADIVSEASRETCVALNDCLNLFTKQEGVRNFKLEQEQEKNKILSEALETLATEHHELERSLVEGSPPVSILSEEEFYDALSGSESEGSLTCLEAVTAHSFEENEVPGSSGKHRMSEGKDCGGGDALSNGIKKHRTSLPSPMFSRNDFSIWSILRKCIGMELSKITMPVIFNEPLSFLQRLTEYMEHTYLIHKASSLSDPVERMQCVAAFAVSAVASQWERTGKPFNPLLGETYELVRDDLGFRLISEQVSHHPPISAFHAEGLNNDFIFHGSIYPKLKFWGKSVEAEPKGTITLELLDHNEAYTWTNPTCCVHNIIVGKLWIEQYGNVEIINHKTGDKCVLNFKPCGLFGKELHKVEGYIQDKSKKKLCALYGKWTECLYSVDPATFDAYKKNDKKNTEEKKNSKQTSSSEESDEMPVPDSESVFIIPGSVLLWRIAPRPPNSAQMYNFTSFAMVLNEVDKEMESVIPKTDCRLRPDIRAMENGEIDLASEEKKRLEEKQRAARKNRSKSEEDWKTRWFHQGPNPYSGAQDWIYSGSYWDRNYFNLPDIY

>XP_016881019.1_ORP1_Homo_sapiens
MLVPHASPTRSSAACLLEMNTEAEQQLLHHARNGNAEEVRQLLETMARNEVIADINCKGRSKSNLGWTPLHLACYFGHRQVVQDLLKAGAEVNVLNDMGDTPLHRAAFTGRKELVMLLLEYNADTTIVNGSGQTAKEVTHAEEIRSMLEAVERTQQRKLEELLLAAAREGKTTELTALLNRPNPPDVNCSDQLGNTPLHCAAYRAHKQCALKLLRSGADPNLKNKNDQKPLDLAQGAEMKHILVGNKVIYKALKRYEGPLWKSSRFFGWRLFWVVLEHGVLSWYRKQPDAVHNIYRQGCKHLTQAVCTVKSTDSCLFFIKCFDDTIHGFRVPKNSLQQSREDWLEAIEEHSAYSTHYCSQDQLTDEEEEDTVSAADLKKSLEKAQSCQQRLDREISNFLKMIKECDMAKEMLPSFLQKVEVVSEASRETCVALTDCLNLFTKQEGVRNFKLEQEQEKNKILSEALETLATEHHELEQSLVKGSPPASILSEDEFYDALSDSESERSLSRLEAVTARSFEEEGEHLGSRKHRMSEEKDCGGGDALSNGIKKHRTSLPSPMFSRNDFSIWSILRKCIGMELSKITMPVIFNEPLSFLQRLTEYMEHTYLIHKASSLSDPVERMQCVAAFAVSAVASQWERTGKPFNPLLGETYELVRDDLGFRLISEQVSHHPPISAFHAEGLNNDFIFHGSIYPKLKFWGKSVEAEPKGTITLELLEHNEAYTWTNPTCCVHNIIVGKLWIEQYGNVEIINHKTGDKCVLNFKPCGLFGKELHKVEGYIQDKSKKKLCALYGKWTECLYSVDPATFDAYKKNDKKNTEEKKNSKQMSTSEELDEMPVPDSESVFIIPGSVLLWRIAPRPPNSAQMYNFTSFAMVLNEVDKDMESVIPKTDCRLRPDIRAMENGEIDQASEEKKRLEEKQRAARKNRSKSEEDWKTRWFHQGPNPYNGAQDWIYSGSYWDRNYFNLPDIY

>XP_005162397.1_oxysterolbinding_proteinrelated_protein_2_isoform_X1_[Danio_rerio]
MNSEEEFYDAETGLESDDSCEVSFKDACVYANKQTANGKVPSENGVWERRTTLPAPMFSRNDFSVWGFLKKCIGMELSKITMPIVFNEPLSFLQRITEYMEHTYLIHKACTLSDSIERMQFVAAFAVSAVASQWDRTGKPFNPLLGETFELTREDEGYRMISEQVSHHPPISAFYAESLNQDFSFHGSIYPKLKFWGKSVEAEPKGTMTLELSKHREAYTWTNPMCCVHNVILGKLWIEQYGTVEIVNHSTGDKCVLNFKPCGMFGKELHRVEGHIQDKSKKKHWVMYGKWTECMYSIEPKVYEANKKAEKKSGGESKKHKQDQGTGGEDADEMPDVQETVTMIPGSKLLWRVAPRPPQSTEMYNFTNFAMTLNELEPGMTEVLAPTDCRLRPDIRAMENGDIDSASREKERLEEKQRAARRERAKDEEDWSTRWFQQGNNPYTGTADWIYKGGYFDRRYSELPDIY

>NP_001008448.1_oxysterolbinding_proteinrelated_protein_2_[Gallus_gallus]
MNSEEEFYDAVTGFDSDNSSGEFSEANHKVAEMLDLDPHQSSRTGKHNGETEIQENGIKRHRTSLPAPMFSRSDFSVWSILKKCIGLELSKITMPIVFNEPLSFLQRITEYMEHIYLINKACSHADPLERMQAVAAFAVSAVASQWERTGKPFNPLLGETYELTREDLGFRFISEQVSHHPPISAFYSEGLNKDFIFHGSIYPKLKFWGKSIEAEPRGTITLELLKHNEAYTWTNPTCCVHNVIIGKLWLEQYGTVEIVNHSTGDKCVLNFKPCGLFGKELHRVEGYIQDKNRKKLCVIYGKWTECLWCTDPTTYETYKKNEKRGGEQKKLKPSEDVIKSENDEADDMPEVQDTVQFIPGSKLLWRINCRPPNSSQMYNFTSFAVSLNELEKGMEAILAPTDCRLRPDIRNMENGNMDVASKEKERLEEKQRAARKERAKDEVEWQTRWFHQGTNPYTGTSDWLYSGGYFDRNFSDCPDIY

>XP_007475674.1_PREDICTED:_oxysterolbinding_proteinrelated_protein_2_[Monodelphis_domestica]
MNNEEEFFDAVTGFDSDNSPGEFSETNQKVTGMIDLDTSKNKNSTEENEENPPQENGIKKHRTSLPAPMFNRSDFSVWSILKKCIGLELSKITMPVVFNEPLSFLQRITEYMEHIYLIHKASSQTQSLERMAAVAAFAVSAVASQWERTGKPFNPLLGETYELIRDDLGFRFISEQVSHHPPVSAFYSEGINQDFIFHGSIYPKLKFWGKSVEAEPRGTITLELLKHGEAYTWTNPTCCVHNIIIGKLWIEQYGTVEILNHRTGDKCILNFKPCGLFGKELHKIEGYIQDKSKKKLFMIYGKWTECLWGIDAVSYEFYKKHERKGDYQRKSKLEDEPKTFEGDETDNVPDSQDTVQVIPGSELLWRINTRPPNSSEMYNFTRFTVTLNELEKGMEKILPPTDCRLRPDIRSMENGDMDLASQEKERLEEKQRQSRKDRDKDEEEWNTRWFYQGVNPHTGTADWLYSGRYFDRNFSDCPDIY

>NP_055650.1_ORP4_isoform_1_Homo_sapiens
MNGEEEFFDAVTEANQKVTGMIDLDTSKNNRIGKTGERPSQENGIQKHRTSLPAPMFSRSDFSVWTILKKCVGLELSKITMPIAFNEPLSFLQRITEYMEHVYLIHRASCQPQPLERMQSVAAFAVSAVASQWERTGKPFNPLLGETYELIREDLGFRFISEQVSHHPPISAFHSEGLNHDFLFHGSIYPKLKFWGKSVEAEPRGTITLELLKHNEAYTWTNPTCCVHNVIIGKLWIEQYGTVEILNHRTGHKCVLHFKPCGLFGKELHKVEGHIQDKNKKKLFMIYGKWTECLWGIDPVSYESFKKQERRGDHLRKAKLDEDSGKADSDVADDVPVAQETVQVIPGSKLLWRINTRPPNSAQMYNFTSFTVSLNELETGMEKTLPPTDCRLRPDIRGMENGNMDLASQEKERLEEKQREARRERAKEEAEWQTRWFYPGNNPYTGTPDWLYAGDYFERNFSDCPDIY
